# Supplementary material
Source: publisher figshare collection journal article supplement (https://gsapubs.figshare.com/ndownloader/files/23307221)
Supplement: Supplementary file 1 [file 23307221]

## Sheet: Ivrea
					Units - micro watts m-3					heat production lower bound									heat production upper bound											heat production	1 sigma error
Sample	K2O (wt%)	Th (ppm)	U (ppm)	∆Time (Ma)	heat from U at nominated time	heat from Th at time	heat from K at time	total heat production at time (micro watts m-3)		K2O (wt%)	Th (ppm)	U (ppm)	∆Time (Ma)	heat from U at nominated time	heat from Th at time	heat from K at time	total heat production at time (micro watts m-3)		K2O (wt%)	Th (ppm)	U (ppm)	∆Time (Ma)	heat from U at nominated time	heat from Th at time	heat from K at time	total heat production at time (micro watts m-3)
Subsolidus	3.6	18.3	1.93724	0	0.507953	1.32913	0.354586	2.19167		3.33658	16.0231	0.847679	0	0.222265	1.16376	0.32864	1.71466		3.86342	20.5769	3.0268	0	0.793641	1.4945	0.380532	2.66867				2.19167	0.477005
Subsolidus	3.5	19.5	2.67524	0	0.701459	1.41629	0.344736	2.46248		3.2385	17.1226	1.53354	0	0.4021	1.24362	0.318979	1.9647		3.7615	21.8774	3.81694	0	1.00082	1.58895	0.370493	2.96026				2.46248	0.497784
Subsolidus	3.8	22.5	2.30624	0	0.604706	1.63417	0.374285	2.61317		3.52266	19.8779	1.07944	0	0.283033	1.44373	0.346968	2.07373		4.07734	25.1221	3.53304	0	0.926379	1.82462	0.401601	3.1526				2.61317	0.539433
Subsolidus	3.5	19.2	2.49074	0	0.653083	1.3945	0.344736	2.39231		3.23902	16.8476	1.36229	0	0.357199	1.22364	0.319031	1.89987		3.76098	21.5524	3.61918	0	0.948966	1.56535	0.370441	2.88476				2.39231	0.492442
Subsolidus	3.9	24.8	2.49074	0	0.653083	1.80122	0.384134	2.83844		3.61546	21.9963	1.19132	0	0.312369	1.59759	0.356109	2.26607		4.18454	27.6037	3.79015	0	0.993796	2.00486	0.41216	3.41081				2.83844	0.57237
Subsolidus	4	23.5	2.67524	0	0.701459	1.70681	0.393984	2.80225		3.71346	20.7983	1.40953	0	0.369584	1.51058	0.365761	2.24592		4.28654	26.2017	3.94095	0	1.03333	1.90303	0.422207	3.35857				2.80225	0.556324
Subsolidus	4.4	24.7	2.39849	0	0.628894	1.79396	0.433382	2.85624		4.0973	21.9041	1.09964	0	0.288331	1.59089	0.403568	2.28279		4.7027	27.4959	3.69733	0	0.969458	1.99703	0.463197	3.42968				2.85624	0.573446
Subsolidus	3.9	21.6	2.67524	0	0.701459	1.56881	0.384134	2.6544		3.61989	19.0503	1.46678	0	0.384597	1.38363	0.356545	2.12477		4.18011	24.1497	3.88369	0	1.01832	1.75399	0.411724	3.18403				2.6544	0.529633
Subsolidus	4.2	23.5	2.49074	0	0.653083	1.70681	0.413683	2.77357		3.90614	20.7983	1.22705	0	0.321739	1.51058	0.384739	2.21706		4.49386	26.2017	3.75442	0	0.984426	1.90303	0.442628	3.33009				2.77357	0.556515
Subsolidus	4.2	23.4	2.95198	0	0.774024	1.69954	0.413683	2.88725		3.90604	20.7062	1.68181	0	0.440978	1.50389	0.384729	2.3296		4.49396	26.0938	4.22216	0	1.10707	1.8952	0.442637	3.4449				2.88725	0.557653
Subsolidus	2.1	13.2	1.24537	0	0.326541	0.958716	0.206842	1.4921		1.90945	11.3661	0.347286	0	0.0910598	0.825521	0.188074	1.10465		2.29055	15.0339	2.14345	0	0.562023	1.09191	0.22561	1.87954				1.4921	0.387445
Subsolidus	3.6	9.4	1.66049	0	0.435388	0.682722	0.354586	1.4727		3.34743	7.91269	0.853359	0	0.223754	0.574699	0.329708	1.12816		3.85257	10.8873	2.46762	0	0.647022	0.790745	0.379463	1.81723				1.4727	0.344534
Subsolidus	5	15.7	2.30624	0	0.604706	1.14029	0.49248	2.23748		4.68723	13.6454	1.27359	0	0.333941	0.991067	0.461674	1.78668		5.31277	17.7546	3.33889	0	0.875471	1.28952	0.523286	2.68827				2.23748	0.450796
Subsolidus	2.9	9.8	1.33762	0	0.35073	0.711774	0.285638	1.34814		2.67752	8.27564	0.536218	0	0.140599	0.60106	0.263725	1.00538		3.12248	11.3244	2.13902	0	0.56086	0.822488	0.307552	1.6909				1.34814	0.342758
Subsolidus	4	9.2	1.98336	0	0.520047	0.668196	0.393984	1.58223		3.73108	7.73125	1.16763	0	0.306157	0.561521	0.367496	1.23517		4.26892	10.6687	2.7991	0	0.733938	0.774871	0.420472	1.92928				1.58223	0.347053
Subsolidus	4	19	2.99811	0	0.786118	1.37997	0.393984	2.56007		3.71939	16.6642	1.85939	0	0.487541	1.21032	0.366345	2.06421		4.28061	21.3358	4.13683	0	1.08469	1.54962	0.421623	3.05593				2.56007	0.495862
Subsolidus	3	17.8	2.16786	0	0.568424	1.29281	0.295488	2.15673		2.76187	15.5654	1.09431	0	0.286934	1.13051	0.272033	1.68948		3.23813	20.0346	3.24141	0	0.849913	1.45511	0.318943	2.62397				2.15673	0.467244
Subsolidus	3.1	15.9	2.39849	0	0.628894	1.15482	0.305338	2.08905		2.86022	13.8283	1.3772	0	0.361107	1.00435	0.28172	1.64717		3.33978	17.9717	3.41978	0	0.896682	1.30529	0.328955	2.53092				2.08905	0.441876
Subsolidus	4.1	18.3	2.76749	0	0.725647	1.32913	0.403834	2.45861		3.81659	16.023	1.65427	0	0.433756	1.16375	0.375919	1.97343		4.38341	20.577	3.8807	0	1.01754	1.49451	0.431748	2.94379				2.45861	0.485185
Subsolidus	4.1	19.2	2.76749	0	0.725647	1.3945	0.403834	2.52398		3.81544	16.8475	1.62714	0	0.426645	1.22364	0.375806	2.02609		4.38456	21.5525	3.90783	0	1.02465	1.56535	0.431861	3.02187				2.52398	0.497889
Subsolidus	2.8	17.4	2.49074	0	0.653083	1.26376	0.275789	2.19263		2.57078	15.1994	1.42387	0	0.373346	1.10393	0.253211	1.73049		3.02922	19.6006	3.5576	0	0.932819	1.42359	0.298366	2.65478				2.19263	0.462145
Subsolidus	1.8	19	3.04423	0	0.798212	1.37997	0.177293	2.35547		1.61124	16.6644	1.92352	0	0.504355	1.21034	0.158701	1.87339		1.98876	21.3356	4.16495	0	1.09207	1.5496	0.195884	2.83756				2.35547	0.482082
Subsolidus	1.9	17.9	1.79887	0	0.471671	1.30008	0.187142	1.95889		1.70992	15.657	0.740134	0	0.194067	1.13717	0.168421	1.49966		2.09008	20.143	2.8576	0	0.749275	1.46298	0.205864	2.41812				1.95889	0.459232
Subsolidus	2.4	25.7	2.62911	0	0.689365	1.86659	0.23639	2.79235		2.17346	22.8268	1.31225	0	0.344079	1.65791	0.214077	2.21607		2.62654	28.5732	3.94597	0	1.03465	2.07527	0.258704	3.36862				2.79235	0.576278
Subsolidus	2.8	25.2	2.95198	0	0.774024	1.83028	0.275789	2.88009		2.55779	22.3653	1.64043	0	0.430128	1.6244	0.251932	2.30645		3.04221	28.0347	4.26354	0	1.11792	2.03616	0.299646	3.45372				2.88009	0.573634
Subsolidus	3.5	23.5	2.21399	0	0.580518	1.70681	0.344736	2.63206		3.23292	20.7983	0.961732	0	0.252171	1.51058	0.318429	2.08118		3.76708	26.2017	3.46624	0	0.908865	1.90303	0.371043	3.18293				2.63206	0.550876
Subsolidus	2.9	21.6	2.81361	0	0.737741	1.56881	0.285638	2.59219		2.65975	19.0504	1.6108	0	0.422358	1.38363	0.261975	2.06796		3.14025	24.1496	4.01643	0	1.05313	1.75398	0.309302	3.11641				2.59219	0.524224
Subsolidus	4.3	28.1	3.32098	0	0.870777	2.0409	0.423533	3.33521		3.9957	25.045	1.9075	0	0.500156	1.81902	0.39356	2.71274		4.6043	31.155	4.73446	0	1.2414	2.26279	0.453505	3.95769				3.33521	0.622477
Subsolidus	4.3	27.3	4.88922	0	1.28198	1.9828	0.423533	3.68831		3.99617	24.3048	3.46559	0	0.908693	1.76526	0.393607	3.06756		4.60383	30.2952	6.31286	0	1.65526	2.20034	0.453459	4.30906				3.68831	0.620747
Subsolidus	3.3	28.9	3.73611	0	0.979624	2.09901	0.325037	3.40367		3.03141	25.7858	2.29954	0	0.602951	1.87282	0.298582	2.77435		3.56859	32.0142	5.17267	0	1.3563	2.32519	0.351492	4.03298				3.40367	0.629314
Subsolidus	4.2	25.1	3.27486	0	0.858683	1.82301	0.413683	3.09538		3.90354	22.273	1.94854	0	0.510916	1.61769	0.384483	2.51308		4.49646	27.927	4.60118	0	1.20645	2.02834	0.442884	3.67767				3.09538	0.582294
Subsolidus	4.3	31.4	2.85974	0	0.749836	2.28058	0.423533	3.45395		3.99118	28.1047	1.36317	0	0.35743	2.04124	0.393116	2.79179		4.60882	34.6953	4.3563	0	1.14224	2.51992	0.45395	4.11611				3.45395	0.662164
Subsolidus	2.4	25.8	3.18261	0	0.834494	1.87385	0.23639	2.94474		2.17292	22.9191	1.85181	0	0.485552	1.66461	0.214024	2.36419		2.62708	28.6809	4.51341	0	1.18344	2.08309	0.258757	3.52529				2.94474	0.580549
Subsolidus	4.1	20.4	2.58299	0	0.677271	1.48165	0.403834	2.56276		3.81397	17.9482	1.41067	0	0.369884	1.30358	0.375661	2.04912		4.38603	22.8518	3.7553	0	0.984658	1.65972	0.432006	3.07639				2.56276	0.513632
Subsolidus	3.1	23.9	1.89112	0	0.495859	1.73586	0.305338	2.53705		2.84843	21.1668	0.636436	0	0.166876	1.53735	0.280559	1.98478		3.35157	26.6332	3.14579	0	0.824842	1.93437	0.330116	3.08932				2.53705	0.552271
Subsolidus	3.7	21.6	2.35236	0	0.6168	1.56881	0.364435	2.55004		3.42779	19.0504	1.15248	0	0.302187	1.38363	0.337624	2.02344		3.97221	24.1496	3.55224	0	0.931414	1.75399	0.391247	3.07665				2.55004	0.526604
Subsolidus	3.8	16.3	2.26011	0	0.592612	1.18387	0.374285	2.15077		3.53103	14.1936	1.22276	0	0.320612	1.03088	0.347793	1.69929		4.06897	18.4064	3.29747	0	0.864612	1.33686	0.400777	2.60225				2.15077	0.451479
Subsolidus	4.4	24	2.35236	0	0.6168	1.74312	0.433382	2.7933		4.09827	21.2588	1.07497	0	0.281862	1.54403	0.403663	2.22955		4.70173	26.7412	3.62976	0	0.951739	1.94221	0.463101	3.35705				2.7933	0.563748
Subsolidus	2.5	16.1	2.49074	0	0.653083	1.16934	0.24624	2.06867		2.28585	14.011	1.46676	0	0.384592	1.01762	0.225147	1.62736		2.71415	18.189	3.51471	0	0.921574	1.32107	0.267333	2.50997				2.06867	0.441309
Subsolidus	3.5	22.7	1.89112	0	0.495859	1.6487	0.344736	2.4893		3.2343	20.0619	0.66914	0	0.175452	1.4571	0.318566	1.95112		3.7657	25.3381	3.11309	0	0.816266	1.8403	0.370906	3.02748				2.4893	0.53818
Subsolidus	3.6	21.2	2.44461	0	0.640988	1.53976	0.354586	2.53533		3.33223	18.6829	1.25572	0	0.329256	1.35694	0.328211	2.0144		3.86777	23.7171	3.6335	0	0.952721	1.72258	0.38096	3.05626				2.53533	0.520927
Subsolidus	3.8	20.6	2.30624	0	0.604706	1.49618	0.374285	2.47517		3.52533	18.1319	1.13659	0	0.29802	1.31692	0.347231	1.96217		4.07467	23.0681	3.47588	0	0.911393	1.67544	0.401339	2.98817				2.47517	0.513002
Subsolidus	3.5	19.6	2.49074	0	0.653083	1.42355	0.344736	2.42137		3.23846	17.2143	1.35014	0	0.354012	1.25028	0.318975	1.92327		3.76154	21.9857	3.63134	0	0.952153	1.59682	0.370497	2.91947				2.42137	0.498101
Subsolidus	3.3	19.6	2.58299	0	0.677271	1.42355	0.325037	2.42586		3.0465	17.2144	1.44216	0	0.37814	1.25028	0.300068	1.92849		3.5535	21.9856	3.72382	0	0.976401	1.59682	0.350006	2.92322				2.42586	0.497368
Subsolidus	3.9	22.1	2.67524	0	0.701459	1.60512	0.384134	2.69072		3.6192	19.51	1.45187	0	0.380688	1.41701	0.356477	2.15417		4.1808	24.69	3.8986	0	1.02223	1.79324	0.411792	3.22726				2.69072	0.536542
Subsolidus	3.2	21.2	2.62911	0	0.689365	1.53976	0.315187	2.54431		2.94816	18.6829	1.43978	0	0.377516	1.35694	0.290382	2.02484		3.45184	23.7171	3.81845	0	1.00121	1.72257	0.339992	3.06378				2.54431	0.519473
Subsolidus	4.2	16.2	2.26011	0	0.592612	1.17661	0.413683	2.1829		3.91564	14.1022	1.22168	0	0.320331	1.02424	0.385674	1.73025		4.48436	18.2978	3.29854	0	0.864893	1.32897	0.441692	2.63555				2.1829	0.452653
Subsolidus	2.7	18.6	2.02949	0	0.532141	1.35092	0.265939	2.149		2.47351	16.2979	0.937033	0	0.245694	1.18372	0.243631	1.67304		2.92649	20.9021	3.12195	0	0.818588	1.51812	0.288248	2.62495				2.149	0.475955
Subsolidus	3	1.76	2.58299	0	0.677271	0.127829	0.295488	1.10059		2.77943	1.01306	1.96121	0	0.514238	0.0735789	0.273763	0.86158		3.22057	2.50694	3.20476	0	0.840303	0.182079	0.317213	1.3396				1.10059	0.239008
Subsolidus	4.2	14.8	2.81361	0	0.737741	1.07492	0.413683	2.22635		3.91697	12.824	1.80398	0	0.473011	0.931411	0.385806	1.79023		4.48303	16.776	3.82324	0	1.00247	1.21844	0.441561	2.66247				2.22635	0.436121
Subsolidus	3.6	15.7	1.93724	0	0.507953	1.14029	0.354586	2.00283		3.34001	13.6456	0.928144	0	0.243364	0.991079	0.328977	1.56342		3.85999	17.7544	2.94634	0	0.772543	1.2895	0.380194	2.44224				2.00283	0.439409
Subsolidus	3.4	23.9	3.22873	0	0.846589	1.73586	0.334886	2.91733		3.13568	21.1667	1.94476	0	0.509925	1.53734	0.308852	2.35612		3.66432	26.6333	4.51271	0	1.18325	1.93437	0.360921	3.47855				2.91733	0.561215
Subsolidus	3	13.3	1.98336	0	0.520047	0.965979	0.295488	1.78151		2.7683	11.457	1.05419	0	0.276412	0.832124	0.272667	1.3812		3.2317	15.143	2.91254	0	0.763682	1.09983	0.318309	2.18183				1.78151	0.400312
Subsolidus	2.5	17.6	2.49074	0	0.653083	1.27829	0.24624	2.17761		2.28345	15.3824	1.42042	0	0.372441	1.11722	0.224911	1.71458		2.71655	19.8176	3.56105	0	0.933724	1.43935	0.267569	2.64065				2.17761	0.463036
Subsolidus	3.3	22.6	2.26011	0	0.592612	1.64144	0.325037	2.55909		3.0422	19.9699	1.03554	0	0.271523	1.45042	0.299644	2.02158		3.5578	25.2301	3.48469	0	0.913701	1.83246	0.350429	3.09659				2.55909	0.537503
Subsolidus	3.1	19.1	2.39849	0	0.628894	1.38723	0.305338	2.32146		2.85559	16.756	1.27884	0	0.335318	1.21699	0.281264	1.83357		3.34441	21.444	3.51814	0	0.922471	1.55748	0.329411	2.80936				2.32146	0.487895
Subsolidus	3.9	22.5	1.93724	0	0.507953	1.63417	0.384134	2.52626		3.61904	19.8779	0.716911	0	0.187977	1.44373	0.356461	1.98817		4.18096	25.1221	3.15757	0	0.827929	1.82462	0.411808	3.06435				2.52626	0.538092
Subsolidus	3.3	20.5	1.98336	0	0.520047	1.48891	0.325037	2.334		3.04553	18.0401	0.828064	0	0.217122	1.31025	0.299973	1.82735		3.55447	22.9599	3.13867	0	0.822972	1.66758	0.350101	2.84065				2.334	0.50665
Subsolidus	2.9	17.4	2.49074	0	0.653083	1.26376	0.285638	2.20248		2.6665	15.1994	1.42295	0	0.373103	1.10393	0.262639	1.73967		3.1335	19.6006	3.55853	0	0.933062	1.42359	0.308637	2.66529				2.20248	0.46281
Subsolidus	3.5	15.3	2.39849	0	0.628894	1.11124	0.344736	2.08487		3.24432	13.2804	1.39159	0	0.36488	0.964555	0.319553	1.64899		3.75568	17.3196	3.40539	0	0.892908	1.25792	0.369919	2.52075				2.08487	0.435881
Subsolidus	3.8	17.4	3.18261	0	0.834494	1.26376	0.374285	2.47254		3.52913	15.1992	2.08941	0	0.547853	1.10392	0.347605	1.99938		4.07087	19.6008	4.27581	0	1.12114	1.4236	0.400965	2.9457				2.47254	0.473163
Subsolidus	3.4	17.3	3.22873	0	0.846589	1.2565	0.334886	2.43797		3.14529	15.1078	2.14126	0	0.561449	1.09728	0.309799	1.96853		3.65471	19.4922	4.3162	0	1.13173	1.41572	0.359974	2.90742				2.43797	0.469446
Subsolidus	3.1	16	2.33391	0	0.611963	1.16208	0.305338	2.07938		2.86012	13.9196	1.31111	0	0.34378	1.01098	0.28171	1.63647		3.33988	18.0804	3.35671	0	0.880145	1.31318	0.328965	2.52229				2.07938	0.44291
Subsolidus	4.3	18.4	2.62911	0	0.689365	1.33639	0.423533	2.44929		4.00902	16.1146	1.51415	0	0.397016	1.1704	0.394873	1.96229		4.59098	20.6854	3.74408	0	0.981714	1.50238	0.452193	2.93629				2.44929	0.487
Subsolidus	4.2	18.5	2.12174	0	0.55633	1.34366	0.413683	2.31367		3.9129	16.2062	1.01614	0	0.266437	1.17706	0.385405	1.8289		4.4871	20.7938	3.22733	0	0.846222	1.51025	0.441961	2.79844				2.31367	0.48477
Subsolidus	3.7	20.4	2.85974	0	0.749836	1.48165	0.364435	2.59592		3.4292	17.9482	1.68495	0	0.441803	1.30358	0.337762	2.08315		3.9708	22.8518	4.03452	0	1.05787	1.65972	0.391108	3.1087				2.59592	0.512777
Suprasolidus	3.1	13.7	2.44461	0	0.640988	0.995031	0.305338	1.94136		2.86316	11.8213	1.48994	0	0.390668	0.858584	0.28201	1.53126		3.33684	15.5787	3.39929	0	0.891309	1.13148	0.328666	2.35145				1.94136	0.410095
Suprasolidus	3.6	19	1.89112	0	0.495859	1.37997	0.354586	2.23041		3.33565	16.6643	0.780992	0	0.20478	1.21033	0.328548	1.74366		3.86435	21.3357	3.00124	0	0.786938	1.54961	0.380623	2.71717				2.23041	0.486756
Suprasolidus	3	15.4	1.75274	0	0.459577	1.1185	0.295488	1.87357		2.7656	13.3718	0.763571	0	0.200212	0.971192	0.272401	1.4438		3.2344	17.4282	2.74191	0	0.718941	1.26581	0.318575	2.30333				1.87357	0.429762
Suprasolidus	3.2	19.3	1.93724	0	0.507953	1.40176	0.315187	2.2249		2.95144	16.9393	0.820637	0	0.215175	1.2303	0.290705	1.73618		3.44856	21.6607	3.05384	0	0.800732	1.57321	0.33967	2.71361				2.2249	0.488715
Suprasolidus	3.4	20.4	2.12174	0	0.55633	1.48165	0.334886	2.37287		3.14155	17.9483	0.965697	0	0.25321	1.30359	0.30943	1.86623		3.65845	22.8517	3.27778	0	0.859449	1.65972	0.360343	2.87951				2.37287	0.506642
Suprasolidus	3.3	21.9	1.84499	0	0.483765	1.5906	0.325037	2.3994		3.04351	19.3262	0.649842	0	0.170391	1.40366	0.299774	1.87383		3.55649	24.4738	3.04014	0	0.797138	1.77753	0.3503	2.92497				2.3994	0.525572
Suprasolidus	3.1	17.4	2.30624	0	0.604706	1.26376	0.305338	2.17381		2.85815	15.1994	1.2409	0	0.325369	1.10393	0.281516	1.71082		3.34185	19.6006	3.37158	0	0.884043	1.42359	0.329159	2.6368				2.17381	0.46299
Suprasolidus	3.1	17.2	2.58299	0	0.677271	1.24924	0.305338	2.23184		2.85826	15.0164	1.51725	0	0.397829	1.09064	0.281527	1.77		3.34174	19.3836	3.64872	0	0.956712	1.40783	0.329148	2.69369				2.23184	0.461846
Suprasolidus	3.4	15.6	2.85974	0	0.749836	1.13303	0.334886	2.21775		3.14778	13.5542	1.83305	0	0.480634	0.984444	0.310044	1.77512		3.65222	17.6458	3.88642	0	1.01904	1.28161	0.359729	2.66038				2.21775	0.442628
Suprasolidus	3.6	18.2	2.81361	0	0.737741	1.32187	0.354586	2.41419		3.33621	15.9315	1.70714	0	0.44762	1.1571	0.328603	1.93333		3.86379	20.4685	3.92008	0	1.02786	1.48663	0.380568	2.89506				2.41419	0.480867
Suprasolidus	4.3	20.4	3.59773	0	0.943342	1.48165	0.423533	2.84853		4.00603	17.9481	2.4006	0	0.629447	1.30357	0.394578	2.3276		4.59397	22.8519	4.79487	0	1.25724	1.65973	0.452488	3.36945				2.84853	0.520927
Suprasolidus	3.5	22.7	2.58299	0	0.677271	1.6487	0.344736	2.67071		3.2339	20.0619	1.34713	0	0.353224	1.4571	0.318526	2.12885		3.7661	25.3381	3.81884	0	1.00132	1.84031	0.370946	3.21257				2.67071	0.541861
Suprasolidus	4	18.2	2.67524	0	0.701459	1.32187	0.393984	2.41731		3.72059	15.9314	1.56816	0	0.411179	1.1571	0.366463	1.93474		4.27941	20.4686	3.78231	0	0.991739	1.48663	0.421505	2.89988				2.41731	0.482566
Suprasolidus	3.5	19.1	2.26011	0	0.592612	1.38723	0.344736	2.32458		3.2393	16.756	1.13985	0	0.298874	1.21699	0.319058	1.83492		3.7607	21.444	3.38038	0	0.88635	1.55748	0.370414	2.81424				2.32458	0.489663
Suprasolidus	3.1	20.6	2.21399	0	0.580518	1.49618	0.305338	2.38203		2.85343	18.1319	1.05257	0	0.275989	1.31692	0.281051	1.87396		3.34657	23.0681	3.37541	0	0.885047	1.67543	0.329624	2.89011				2.38203	0.508072
Suprasolidus	3	18.7	2.07561	0	0.544235	1.35818	0.295488	2.1979		2.76058	16.3895	0.97634	0	0.256001	1.19037	0.271906	1.71828		3.23942	21.0105	3.17489	0	0.83247	1.52599	0.31907	2.67753				2.1979	0.479628
Suprasolidus	3.2	19	2.21399	0	0.580518	1.37997	0.315187	2.27568		2.95171	16.6644	1.10059	0	0.28858	1.21033	0.290731	1.78964		3.44829	21.3356	3.32738	0	0.872455	1.54961	0.339643	2.76171				2.27568	0.486031
Suprasolidus	3.9	19.3	2.35236	0	0.6168	1.40176	0.384134	2.40269		3.62319	16.9393	1.2202	0	0.319943	1.2303	0.356869	1.90711		4.17681	21.6607	3.48452	0	0.913658	1.57322	0.411399	2.89828				2.40269	0.495583
Suprasolidus	2.6	17.6	2.35236	0	0.6168	1.27829	0.25609	2.15118		2.37919	15.3824	1.28441	0	0.336778	1.11722	0.234341	1.68834		2.82081	19.8176	3.42032	0	0.896822	1.43935	0.277838	2.61401				2.15118	0.462835
Suprasolidus	2.5	14.9	1.98336	0	0.520047	1.08219	0.24624	1.84847		2.28807	12.9155	1.00929	0	0.264641	0.938054	0.225365	1.42806		2.71193	16.8845	2.95744	0	0.775454	1.22632	0.267115	2.26889				1.84847	0.420414
Suprasolidus	4.5	21.9	3.04423	0	0.798212	1.5906	0.443232	2.83204		4.19711	19.326	1.81363	0	0.475541	1.40365	0.413399	2.29259		4.80289	24.474	4.27484	0	1.12088	1.77755	0.473065	3.37149				2.83204	0.539452
Suprasolidus	4.6	26.2	3.09036	0	0.810306	1.90291	0.453082	3.16629		4.2879	23.2883	1.73294	0	0.454386	1.69143	0.422341	2.56816		4.9121	29.1117	4.44777	0	1.16623	2.11438	0.483822	3.76443				3.16629	0.598136
Suprasolidus	3.8	22.9	2.62911	0	0.689365	1.66323	0.374285	2.72688		3.52192	20.2459	1.3838	0	0.362838	1.47046	0.346895	2.18019		4.07808	25.5541	3.87442	0	1.01589	1.85599	0.401675	3.27356				2.72688	0.546682
Suprasolidus	5.3	28	2.53686	0	0.665177	2.03364	0.522029	3.22085		4.96263	24.9524	1.13328	0	0.29715	1.81229	0.488799	2.59824		5.63737	31.0476	3.94045	0	1.0332	2.25499	0.555258	3.84345				3.22085	0.622601
Suprasolidus	3.3	21.9	2.81361	0	0.737741	1.5906	0.325037	2.65338		3.04294	19.3261	1.59845	0	0.419122	1.40366	0.299717	2.1225		3.55706	24.4739	4.02877	0	1.05636	1.77754	0.350356	3.18425				2.65338	0.530879
Suprasolidus	4.1	17.5	2.44461	0	0.640988	1.27102	0.403834	2.31585		3.81776	15.2908	1.36318	0	0.357431	1.11057	0.376034	1.84403		4.38224	19.7092	3.52605	0	0.924546	1.43148	0.431633	2.78766				2.31585	0.471814
Suprasolidus	3.7	20.8	2.39849	0	0.628894	1.5107	0.364435	2.50403		3.4289	18.3155	1.22174	0	0.320347	1.33025	0.337732	1.98833		3.9711	23.2845	3.57523	0	0.937442	1.69115	0.391138	3.01973				2.50403	0.515701
Suprasolidus	3	17.4	2.02949	0	0.532141	1.26376	0.295488	2.09139		2.76255	15.1994	0.971482	0	0.254727	1.10393	0.2721	1.63076		3.23745	19.6006	3.0875	0	0.809556	1.42359	0.318876	2.55202				2.09139	0.460632
Suprasolidus	3.1	14.2	1.98336	0	0.520047	1.03135	0.305338	1.85673		2.8628	12.2771	1.02507	0	0.268778	0.891684	0.281974	1.44244		3.3372	16.1229	2.94166	0	0.771316	1.17101	0.328701	2.27103				1.85673	0.414294
Suprasolidus	3.2	16.6	2.53686	0	0.665177	1.20566	0.315187	2.18602		2.95494	14.4678	1.48967	0	0.390598	1.0508	0.29105	1.73245		3.44506	18.7322	3.58405	0	0.939755	1.36052	0.339324	2.6396				2.18602	0.453577
Suprasolidus	4.1	19.5	2.02949	0	0.532141	1.41629	0.403834	2.35226		3.81545	17.1226	0.89634	0	0.235024	1.24362	0.375806	1.85445		4.38455	21.8774	3.16264	0	0.829258	1.58895	0.431861	2.85007				2.35226	0.497813
Suprasolidus	4.1	19	2.02949	0	0.532141	1.37997	0.403834	2.31594		3.81609	16.6643	0.911602	0	0.239026	1.21033	0.37587	1.82522		4.38391	21.3357	3.14738	0	0.825257	1.54961	0.431797	2.80667				2.31594	0.490721
Suprasolidus	3.6	22	2.39849	0	0.628894	1.59786	0.354586	2.58134		3.3311	19.4181	1.18652	0	0.31111	1.41033	0.3281	2.04954		3.8689	24.5819	3.61046	0	0.946679	1.78539	0.381071	3.11314				2.58134	0.531796
Suprasolidus	4	20.5	2.44461	0	0.640988	1.48891	0.393984	2.52389		3.7177	18.04	1.2732	0	0.333839	1.31025	0.366179	2.01026		4.2823	22.96	3.61603	0	0.948138	1.66758	0.421789	3.03751				2.52389	0.513623
Suprasolidus	3.9	24.8	2.49074	0	0.653083	1.80122	0.384134	2.83844		3.61546	21.9963	1.19132	0	0.312369	1.59759	0.356109	2.26607		4.18454	27.6037	3.79015	0	0.993796	2.00486	0.41216	3.41081				2.83844	0.57237
Suprasolidus	4	23.5	2.67524	0	0.701459	1.70681	0.393984	2.80225		3.71346	20.7983	1.40953	0	0.369584	1.51058	0.365761	2.24592		4.28654	26.2017	3.94095	0	1.03333	1.90303	0.422207	3.35857				2.80225	0.556324
Suprasolidus	4.4	24.7	2.39849	0	0.628894	1.79396	0.433382	2.85624		4.0973	21.9041	1.09964	0	0.288331	1.59089	0.403568	2.28279		4.7027	27.4959	3.69733	0	0.969458	1.99703	0.463197	3.42968				2.85624	0.573446
Suprasolidus	3.9	21.6	2.67524	0	0.701459	1.56881	0.384134	2.6544		3.61989	19.0503	1.46678	0	0.384597	1.38363	0.356545	2.12477		4.18011	24.1497	3.88369	0	1.01832	1.75399	0.411724	3.18403				2.6544	0.529633
Suprasolidus	4.2	23.5	2.49074	0	0.653083	1.70681	0.413683	2.77357		3.90614	20.7983	1.22705	0	0.321739	1.51058	0.384739	2.21706		4.49386	26.2017	3.75442	0	0.984426	1.90303	0.442628	3.33009				2.77357	0.556515
Suprasolidus	4.2	23.4	2.95198	0	0.774024	1.69954	0.413683	2.88725		3.90604	20.7062	1.68181	0	0.440978	1.50389	0.384729	2.3296		4.49396	26.0938	4.22216	0	1.10707	1.8952	0.442637	3.4449				2.88725	0.557653
Suprasolidus	2.3	28.3	1.33762	0	0.35073	2.05543	0.226541	2.6327		2.07353	25.2304	-0.0314146	0	-0.00823706	1.83248	0.204235	2.02848		2.52647	31.3696	2.70665	0	0.709696	2.27838	0.248847	3.23692				2.6327	0.604221
Suprasolidus	2	20.5	1.47599	0	0.387012	1.48891	0.196992	2.07292		1.8009	18.0403	0.341926	0	0.0896545	1.31026	0.177382	1.5773		2.1991	22.9597	2.61006	0	0.684369	1.66757	0.216602	2.56854				2.07292	0.495619
Suprasolidus	2.4	30.5	1.52212	0	0.399106	2.21522	0.23639	2.85071		2.16523	27.2693	0.0863053	0	0.0226296	1.98057	0.213267	2.21647		2.63477	33.7307	2.95793	0	0.775582	2.44986	0.259514	3.48496				2.85071	0.634245
Suprasolidus	1.9	26.2	1.24537	0	0.326541	1.90291	0.187142	2.41659		1.69403	23.2886	-0.0576645	0	-0.0151199	1.69145	0.166855	1.84319		2.10597	29.1114	2.5484	0	0.668202	2.11436	0.20743	2.98999				2.41659	0.573403
Suprasolidus	1.7	22.8	1.33762	0	0.35073	1.65596	0.167443	2.17414		1.50928	20.1541	0.137203	0	0.0359752	1.46379	0.148658	1.64843		1.89072	25.4459	2.53803	0	0.665484	1.84813	0.186229	2.69985				2.17414	0.52571
Suprasolidus	2.9	32.7	1.89112	0	0.495859	2.375	0.285638	3.1565		2.64145	29.3131	0.384827	0	0.100903	2.12901	0.260172	2.49009		3.15855	36.0869	3.3974	0	0.890815	2.62099	0.311105	3.82291				3.1565	0.666413
Suprasolidus	2.5	25.5	1.24537	0	0.326541	1.85207	0.24624	2.42485		2.27065	22.6423	-0.0409224	0	-0.0107301	1.64451	0.22365	1.85743		2.72935	28.3577	2.53166	0	0.663813	2.05962	0.26883	2.99226				2.42485	0.567417
Suprasolidus	2.6	27.3	1.61437	0	0.423294	1.9828	0.25609	2.66218		2.36307	24.3051	0.267812	0	0.0702216	1.76528	0.232753	2.06825		2.83693	30.2949	2.96092	0	0.776367	2.20032	0.279427	3.25611				2.66218	0.593928
Suprasolidus	2.2	22.5	1.42987	0	0.374918	1.63417	0.216691	2.22578		1.98859	19.8781	0.23338	0	0.0611932	1.44374	0.195868	1.70081		2.41141	25.1219	2.62636	0	0.688642	1.82461	0.237514	2.75076				2.22578	0.524979
Suprasolidus	3.2	25.4	2.07561	0	0.544235	1.8448	0.315187	2.70422		2.9419	22.5499	0.772118	0	0.202453	1.6378	0.289765	2.13002		3.4581	28.2501	3.37911	0	0.886018	2.0518	0.340609	3.27843				2.70422	0.574207
Suprasolidus	2.4	21	1.56824	0	0.4112	1.52523	0.23639	2.17282		2.18267	18.4993	0.413698	0	0.108473	1.3436	0.214985	1.66706		2.61733	23.5007	2.72279	0	0.713927	1.70686	0.257796	2.67858				2.17282	0.505758
Suprasolidus	3.1	20.1	1.10699	0	0.290259	1.45986	0.305338	2.05546		2.8549	17.6731	-0.0166132	0	-0.00435605	1.2836	0.281196	1.56044		3.3451	22.5269	2.2306	0	0.584874	1.63613	0.329479	2.55048				2.05546	0.495022
Suprasolidus	2.5	18	1.10699	0	0.290259	1.30734	0.24624	1.84384		2.28379	15.7486	0.054807	0	0.0143706	1.14382	0.224944	1.38313		2.71621	20.2514	2.15918	0	0.566147	1.47086	0.267536	2.30454				1.84384	0.460705
Suprasolidus	3.5	21	1.52212	0	0.399106	1.52523	0.344736	2.26907		3.23702	18.4992	0.359015	0	0.0941353	1.3436	0.318834	1.75657		3.76298	23.5008	2.68522	0	0.704077	1.70686	0.370638	2.78158				2.26907	0.512505
Suprasolidus	2.9	21.9	2.26011	0	0.592612	1.5906	0.285638	2.46885		2.65961	19.3262	1.05998	0	0.277931	1.40366	0.261961	1.94355		3.14039	24.4738	3.46025	0	0.907293	1.77753	0.309315	2.99414				2.46885	0.525293
Suprasolidus	2.6	20.5	2.21399	0	0.580518	1.48891	0.25609	2.32552		2.37455	18.0402	1.0599	0	0.277909	1.31026	0.233883	1.82205		2.82545	22.9598	3.36808	0	0.883126	1.66757	0.278296	2.829				2.32552	0.503473
Suprasolidus	1.8	8.6	1.01474	0	0.266071	0.624618	0.177293	1.06798		1.63092	7.18785	0.273392	0	0.0716847	0.522053	0.160639	0.754377		1.96908	10.0122	1.7561	0	0.460457	0.727183	0.193947	1.38159				1.06798	0.313604
Suprasolidus	3.3	21.3	1.79887	0	0.471671	1.54702	0.325037	2.34373		3.04445	18.7748	0.622896	0	0.163326	1.36361	0.299866	1.8268		3.55555	23.8252	2.97484	0	0.780015	1.73043	0.350207	2.86065				2.34373	0.516922
Suprasolidus	2.8	25.6	1.61437	0	0.423294	1.85933	0.275789	2.55841		2.55795	22.7345	0.316426	0	0.0829684	1.65121	0.251947	1.98613		3.04205	28.4655	2.91231	0	0.76362	2.06745	0.29963	3.1307				2.55841	0.572286
Suprasolidus	3	18.6	1.66049	0	0.435388	1.35092	0.295488	2.08179		2.761	16.2979	0.573309	0	0.150324	1.18372	0.271947	1.60599		3.239	20.9021	2.74767	0	0.720452	1.51812	0.319029	2.5576				2.08179	0.475804
Suprasolidus	2.7	22.5	1.38374	0	0.362824	1.63417	0.265939	2.26294		2.46752	19.878	0.18421	0	0.0483007	1.44374	0.243041	1.73508		2.93248	25.122	2.58328	0	0.677347	1.82461	0.288838	2.79079				2.26294	0.527855
Suprasolidus	3.4	17.2	1.10699	0	0.290259	1.24924	0.334886	1.87438		3.1467	15.0165	0.0714918	0	0.0187455	1.09065	0.309938	1.41933		3.6533	19.3835	2.1425	0	0.561772	1.40782	0.359835	2.32943				1.87438	0.455051
Suprasolidus	3.8	15.7	1.33762	0	0.35073	1.14029	0.374285	1.86531		3.53232	13.6456	0.340195	0	0.0892008	0.991081	0.347919	1.4282		4.06768	17.7544	2.33504	0	0.612258	1.2895	0.40065	2.30241				1.86531	0.437104
Suprasolidus	2.8	24.2	1.33762	0	0.35073	1.75765	0.275789	2.38416		2.56052	21.4433	0.0864846	0	0.0226766	1.55743	0.252201	1.83231		3.03948	26.9567	2.58875	0	0.678782	1.95786	0.299377	2.93602				2.38416	0.551858
Suprasolidus	2.8	21.9	1.75274	0	0.459577	1.5906	0.275789	2.32596		2.5641	19.3262	0.56365	0	0.147792	1.40366	0.252554	1.80401		3.0359	24.4738	2.94183	0	0.771362	1.77753	0.299024	2.84792				2.32596	0.521953
Suprasolidus	2.8	24.5	1.98336	0	0.520047	1.77944	0.275789	2.57527		2.55959	21.7198	0.711396	0	0.186531	1.57751	0.252109	2.01615		3.04041	27.2802	3.25533	0	0.853563	1.98136	0.299468	3.13439				2.57527	0.559121
Suprasolidus	2.4	24.5	1.75274	0	0.459577	1.77944	0.23639	2.4754		2.17626	21.7199	0.488101	0	0.127982	1.57751	0.214353	1.91985		2.62374	27.2801	3.01738	0	0.791171	1.98136	0.258428	3.03096				2.4754	0.555554
Suprasolidus	3.4	27.1	1.33762	0	0.35073	1.96827	0.334886	2.65389		3.13176	24.1202	-0.00440305	0	-0.0011545	1.75185	0.308466	2.05916		3.66824	30.0798	2.67964	0	0.702614	2.1847	0.361307	3.24862				2.65389	0.594731
Suprasolidus	1.9	16.4	1.24537	0	0.326541	1.19113	0.187142	1.70482		1.71314	14.2852	0.246432	0	0.0646156	1.03754	0.168738	1.27089		2.08686	18.5148	2.24431	0	0.588467	1.34473	0.205547	2.13874				1.70482	0.433926
Suprasolidus	1.8	15.5	1.66049	0	0.435388	1.12577	0.177293	1.73845		1.61896	13.4632	0.681626	0	0.178725	0.977831	0.159461	1.31602		1.98104	17.5368	2.63936	0	0.692051	1.2737	0.195124	2.16088				1.73845	0.422429
Suprasolidus	2.4	19.6	1.70662	0	0.447483	1.42355	0.23639	2.10742		2.18501	17.2145	0.592646	0	0.155395	1.25029	0.215215	1.6209		2.61499	21.9855	2.82059	0	0.739571	1.59681	0.257566	2.59394				2.10742	0.486523
Suprasolidus	2.7	23.2	1.79887	0	0.471671	1.68502	0.265939	2.42263		2.46605	20.5222	0.570204	0	0.14951	1.49053	0.242896	1.88293		2.93395	25.8778	3.02753	0	0.793831	1.87951	0.288982	2.96232				2.42263	0.539693
Suprasolidus	2.6	27.2	2.21399	0	0.580518	1.97554	0.25609	2.81214		2.36285	24.2126	0.859777	0	0.225437	1.75856	0.232732	2.21673		2.83715	30.1874	3.5682	0	0.935598	2.19251	0.279448	3.40756				2.81214	0.595412
Suprasolidus	2.7	24.3	1.66049	0	0.435388	1.76491	0.265939	2.46624		2.46425	21.5355	0.401289	0	0.10522	1.56412	0.242719	1.91206		2.93575	27.0645	2.91969	0	0.765557	1.9657	0.28916	3.02041				2.46624	0.554176
Suprasolidus	3.1	18.4	1.56824	0	0.4112	1.33639	0.305338	2.05293		2.85716	16.1147	0.488316	0	0.128039	1.17041	0.281419	1.57987		3.34284	20.6853	2.64817	0	0.694362	1.50237	0.329257	2.52599				2.05293	0.473059
Suprasolidus	2.8	18.2	1.61437	0	0.423294	1.32187	0.275789	2.02095		2.57013	15.9316	0.542492	0	0.142244	1.15711	0.253148	1.55251		3.02987	20.4684	2.68624	0	0.704345	1.48662	0.29843	2.48939				2.02095	0.468444
Suprasolidus	2.2	14.6	1.61437	0	0.423294	1.0604	0.216691	1.70038		2.00232	12.6419	0.661632	0	0.173483	0.918183	0.197221	1.28889		2.39768	16.5581	2.5671	0	0.673106	1.20261	0.236161	2.11188				1.70038	0.411497
Suprasolidus	2.8	17	1.42987	0	0.374918	1.23471	0.275789	1.88542		2.5721	14.8336	0.39967	0	0.104795	1.07737	0.253342	1.4355		3.0279	19.1664	2.46007	0	0.64504	1.39205	0.298236	2.33533				1.88542	0.449914
Suprasolidus	3.3	25.4	1.89112	0	0.495859	1.8448	0.325037	2.6657		3.03805	22.5499	0.590227	0	0.15476	1.6378	0.299236	2.0918		3.56195	28.2501	3.192	0	0.836958	2.0518	0.350838	3.2396				2.6657	0.573902
Suprasolidus	3.5	27	2.02949	0	0.532141	1.96101	0.344736	2.83789		3.22765	24.0277	0.677693	0	0.177694	1.74513	0.317911	2.24073		3.77235	29.9723	3.38129	0	0.886589	2.17689	0.371561	3.43504				2.83789	0.597153
Suprasolidus	3.7	25.5	1.66049	0	0.435388	1.85207	0.364435	2.65189		3.42248	22.6422	0.357581	0	0.0937593	1.6445	0.3371	2.07536		3.97752	28.3578	2.9634	0	0.777017	2.05963	0.39177	3.22842				2.65189	0.576528
Suprasolidus	4.2	24.1	1.75274	0	0.459577	1.75038	0.413683	2.62364		3.9057	21.351	0.485478	0	0.127294	1.55073	0.384696	2.06272		4.4943	26.849	3.02	0	0.791859	1.95004	0.442671	3.18457				2.62364	0.560927
Suprasolidus	3.2	29.9	1.66049	0	0.435388	2.17164	0.315187	2.92221		2.93478	26.7127	0.233979	0	0.0613505	1.94014	0.289064	2.29056		3.46522	33.0873	3.087	0	0.809426	2.40313	0.34131	3.55387				2.92221	0.631655
Suprasolidus	2.9	24.7	2.12174	0	0.55633	1.79396	0.285638	2.63593		2.65508	21.9042	0.840426	0	0.220364	1.5909	0.261515	2.07278		3.14492	27.4958	3.40305	0	0.892296	1.99702	0.309762	3.19908				2.63593	0.563148
Suprasolidus	3.4	21.3	2.07561	0	0.544235	1.54702	0.334886	2.42614		3.14025	18.7748	0.893162	0	0.234191	1.36361	0.309302	1.9071		3.65975	23.8252	3.25807	0	0.85428	1.73043	0.36047	2.94518				2.42614	0.519037
Suprasolidus	4.2	26.9	1.98336	0	0.520047	1.95375	0.413683	2.88748		3.90165	23.9352	0.629765	0	0.165127	1.73841	0.384297	2.28784		4.49835	29.8648	3.33696	0	0.874967	2.16908	0.443069	3.48712				2.88748	0.599641
Suprasolidus	3	21.9	1.38374	0	0.362824	1.5906	0.295488	2.24891		2.75604	19.3262	0.200092	0	0.052465	1.40366	0.271459	1.72759		3.24396	24.4738	2.56739	0	0.673182	1.77753	0.319517	2.77023				2.24891	0.521319
Suprasolidus	3.1	19.5	1.42987	0	0.374918	1.41629	0.305338	2.09654		2.8556	17.1228	0.318556	0	0.0835267	1.24363	0.281265	1.60842		3.3444	21.8772	2.54118	0	0.666309	1.58894	0.32941	2.58466				2.09654	0.488123
Suprasolidus	3.2	22.8	1.47599	0	0.387012	1.65596	0.315187	2.35816		2.94639	20.154	0.261452	0	0.0685539	1.46379	0.290208	1.82255		3.45361	25.446	2.69053	0	0.70547	1.84814	0.340167	2.89378				2.35816	0.535616
Suprasolidus	3.1	21.5	1.42987	0	0.374918	1.56155	0.305338	2.2418		2.85253	18.9586	0.256752	0	0.0673214	1.37696	0.280963	1.72525		3.34747	24.0414	2.60298	0	0.682514	1.74613	0.329712	2.75835				2.2418	0.516554
Suprasolidus	1.7	38.8	1.42987	0	0.374918	2.81804	0.167443	3.3604		1.47527	35.0054	-0.224783	0	-0.058939	2.54244	0.145308	2.62881		1.92473	42.5946	3.08452	0	0.808775	3.09364	0.189578	4.092				3.3604	0.731592
Suprasolidus	1.6	22.1	1.01474	0	0.266071	1.60512	0.157594	2.02879		1.41524	19.5102	-0.157432	0	-0.0412795	1.41703	0.139395	1.51515		1.78476	24.6898	2.18692	0	0.573421	1.79322	0.175792	2.54243				2.02879	0.513642
Suprasolidus	2.5	19.6	1.24537	0	0.326541	1.42355	0.24624	1.99633		2.28102	17.2145	0.139963	0	0.036699	1.25029	0.224672	1.51166		2.71898	21.9855	2.35077	0	0.616384	1.59681	0.267808	2.481				1.99633	0.484668
Suprasolidus	2	20	0.784121	0	0.2056	1.4526	0.196992	1.85519		1.8024	17.5815	-0.32085	0	-0.0841282	1.27694	0.177529	1.37034		2.1976	22.4185	1.88909	0	0.495328	1.62826	0.216455	2.34004				1.85519	0.48485
Suprasolidus	3.4	27.1	1.10699	0	0.290259	1.96827	0.334886	2.59342		3.1319	24.1202	-0.231249	0	-0.0606345	1.75185	0.308479	1.99969		3.6681	30.0798	2.44524	0	0.641152	2.1847	0.361293	3.18714				2.59342	0.593726
Suprasolidus	2.5	26.4	1.84499	0	0.483765	1.91743	0.24624	2.64744		2.26861	23.4733	0.521517	0	0.136744	1.70486	0.223449	2.06506		2.73139	29.3267	3.16846	0	0.830786	2.13	0.269031	3.22982				2.64744	0.58238
Suprasolidus	3.6	30.2	1.29149	0	0.338635	2.19343	0.354586	2.88665		3.31924	26.9909	-0.140593	0	-0.0368642	1.96035	0.326932	2.25042		3.88076	33.4091	2.72358	0	0.714135	2.4265	0.382239	3.52288				2.88665	0.636228
Suprasolidus	4.3	31.9	1.75274	0	0.459577	2.3169	0.423533	3.20001		3.99101	28.5692	0.260836	0	0.0683923	2.07498	0.393098	2.53647		4.60899	35.2308	3.24465	0	0.850761	2.55881	0.453967	3.86354				3.20001	0.663532
Suprasolidus	2.3	26.4	1.70662	0	0.447483	1.91743	0.226541	2.59146		2.07689	23.4733	0.387004	0	0.101474	1.70487	0.204565	2.0109		2.52311	29.3267	3.02623	0	0.793491	2.13	0.248517	3.17201				2.59146	0.58055
Suprasolidus	3	28.4	1.56824	0	0.4112	2.06269	0.295488	2.76938		2.74517	25.3229	0.187617	0	0.0491941	1.8392	0.270388	2.15878		3.25483	31.4771	2.94887	0	0.773206	2.28618	0.320588	3.37998				2.76938	0.610597
Suprasolidus	3.6	29.1	1.47599	0	0.387012	2.11353	0.354586	2.85513		3.32087	25.9712	0.0723067	0	0.0189591	1.88628	0.327092	2.23234		3.87913	32.2288	2.87968	0	0.755065	2.34078	0.382079	3.47793				2.85513	0.622795
Suprasolidus	2.2	13	1.24537	0	0.326541	0.94419	0.216691	1.48742		2.00515	11.184	0.352711	0	0.0924823	0.812294	0.197499	1.10228		2.39485	14.816	2.13803	0	0.5606	1.07609	0.235883	1.87257				1.48742	0.385147
Suprasolidus	3.7	24.3	1.47599	0	0.387012	1.76491	0.364435	2.51636		3.42437	21.5354	0.21203	0	0.0555953	1.56412	0.337286	1.957		3.97563	27.0646	2.73995	0	0.718429	1.9657	0.391584	3.07571				2.51636	0.559357
Suprasolidus	3.8	25.7	1.19924	0	0.314447	1.86659	0.374285	2.55532		3.51863	22.8268	-0.102426	0	-0.0268565	1.65791	0.346571	1.97762		4.08137	28.5732	2.50091	0	0.655751	2.07527	0.401999	3.13302				2.55532	0.577698
Suprasolidus	3.5	30.3	1.70662	0	0.447483	2.20069	0.344736	2.99291		3.22262	27.0837	0.265877	0	0.069714	1.96709	0.317415	2.35422		3.77738	33.5163	3.14736	0	0.825251	2.43429	0.372057	3.6316				2.99291	0.63869
Suprasolidus	2.6	22.1	1.01474	0	0.266071	1.60512	0.25609	2.12728		2.37265	19.5102	-0.164894	0	-0.0432361	1.41702	0.233697	1.60749		2.82735	24.6898	2.19438	0	0.575377	1.79322	0.278482	2.64708				2.12728	0.519798
Suprasolidus	1.6	17.5	1.47599	0	0.387012	1.27102	0.157594	1.81563		1.42432	15.291	0.439335	0	0.115196	1.11059	0.14029	1.36607		1.77568	19.709	2.51265	0	0.658828	1.43146	0.174897	2.26519				1.81563	0.449557
Suprasolidus	2.6	22.7	1.33762	0	0.35073	1.6487	0.25609	2.25552		2.3714	20.062	0.133629	0	0.0350381	1.45711	0.233573	1.72572		2.8286	25.338	2.54161	0	0.666421	1.8403	0.278606	2.78532				2.25552	0.529803
Suprasolidus	3.1	22.9	1.79887	0	0.471671	1.66323	0.305338	2.44024		2.85009	20.246	0.576022	0	0.151036	1.47047	0.280722	1.90223		3.34991	25.554	3.02171	0	0.792306	1.85599	0.329953	2.97824				2.44024	0.538009
Suprasolidus	1.9	19.9	0.922495	0	0.241882	1.44534	0.187142	1.87436		1.70684	17.4897	-0.181167	0	-0.0475028	1.27028	0.168117	1.39089		2.09316	22.3103	2.02616	0	0.531268	1.62039	0.206167	2.35783				1.87436	0.483468
Suprasolidus	3.4	27.2	1.84499	0	0.483765	1.97554	0.334886	2.79419		3.13131	24.2126	0.491415	0	0.128851	1.75856	0.308421	2.19583		3.66869	30.1874	3.19857	0	0.838678	2.19251	0.361352	3.39254				2.79419	0.598355
Suprasolidus	3.6	22.7	1.66049	0	0.435388	1.6487	0.354586	2.43867		3.3305	20.0619	0.442084	0	0.115917	1.4571	0.328041	1.90106		3.8695	25.3381	2.8789	0	0.75486	1.8403	0.38113	2.97629				2.43867	0.537618
Suprasolidus	2.2	16.1	0.876371	0	0.229788	1.16934	0.216691	1.61582		2.00043	14.0111	-0.10757	0	-0.0282053	1.01763	0.197035	1.18646		2.39957	18.1889	1.86031	0	0.487782	1.32106	0.236348	2.04519				1.61582	0.429364
Suprasolidus	3.1	26.8	1.19924	0	0.314447	1.94648	0.305338	2.56627		2.84412	23.8429	-0.129368	0	-0.0339208	1.73171	0.280135	1.97792		3.35588	29.7571	2.52786	0	0.662815	2.16126	0.330541	3.15462				2.56627	0.588347
Suprasolidus	4.2	29.5	1.56824	0	0.4112	2.14259	0.413683	2.96747		3.89813	26.3418	0.147133	0	0.038579	1.9132	0.38395	2.33573		4.50187	32.6582	2.98935	0	0.783821	2.37197	0.443417	3.5992				2.96747	0.631735
Suprasolidus	4	20.4	2.16786	0	0.568424	1.48165	0.393984	2.44406		3.71798	17.9483	1.00536	0	0.263611	1.30358	0.366207	1.9334		4.28202	22.8517	3.33036	0	0.873237	1.65972	0.421761	2.95472				2.44406	0.51066
Suprasolidus	3.2	14.1	2.35236	0	0.6168	1.02408	0.315187	1.95607		2.95843	12.1859	1.38672	0	0.363604	0.88506	0.291393	1.54006		3.44157	16.0141	3.31801	0	0.869997	1.16311	0.338981	2.37208				1.95607	0.416013
Suprasolidus	4.3	19.3	2.26011	0	0.592612	1.40176	0.423533	2.4179		4.00809	16.9392	1.12617	0	0.295288	1.2303	0.394781	1.92037		4.59191	21.6608	3.39405	0	0.889936	1.57322	0.452284	2.91544				2.4179	0.497538
Suprasolidus	4.1	21.9	2.39849	0	0.628894	1.5906	0.403834	2.62332		3.81207	19.3261	1.18511	0	0.310741	1.40365	0.375473	2.08987		4.38793	24.4739	3.61187	0	0.947048	1.77754	0.432194	3.15678				2.62332	0.533457
Suprasolidus	2.5	14.6	1.66049	0	0.435388	1.0604	0.24624	1.74203		2.28876	12.6419	0.703745	0	0.184525	0.918181	0.225434	1.32814		2.71124	16.5581	2.61724	0	0.686252	1.20262	0.267046	2.15591				1.74203	0.413887
Suprasolidus	3.5	18.9	1.98336	0	0.520047	1.37271	0.344736	2.23749		3.23974	16.5727	0.875281	0	0.229503	1.20368	0.319102	1.75228		3.76026	21.2273	3.09145	0	0.810592	1.54174	0.37037	2.7227				2.23749	0.48521
Suprasolidus	3.1	16.3	2.16786	0	0.568424	1.18387	0.305338	2.05763		2.8598	14.1937	1.13978	0	0.298856	1.03089	0.281679	1.61142		3.3402	18.4063	3.19595	0	0.837991	1.33685	0.328996	2.50384				2.05763	0.446208
Suprasolidus	3.1	15.9	1.66049	0	0.435388	1.15482	0.305338	1.89554		2.86069	13.8283	0.656773	0	0.172209	1.00435	0.281767	1.45833		3.33931	17.9717	2.66421	0	0.698568	1.30528	0.328908	2.33276				1.89554	0.437217
Suprasolidus	3.2	18.2	2.35236	0	0.6168	1.32187	0.315187	2.25385		2.95279	15.9315	1.26041	0	0.330484	1.15711	0.290838	1.77843		3.44721	20.4685	3.44432	0	0.903116	1.48662	0.339537	2.72928				2.25385	0.475424
Suprasolidus	3.7	24.8	2.02949	0	0.532141	1.80122	0.364435	2.6978		3.42331	21.9964	0.740528	0	0.19417	1.5976	0.337183	2.12895		3.97669	27.6036	3.31845	0	0.870113	2.00485	0.391688	3.26665				2.6978	0.568852
Suprasolidus	2.6	14.9	2.30624	0	0.604706	1.08219	0.25609	1.94298		2.38339	12.9155	1.32314	0	0.346932	0.938052	0.234755	1.51974		2.81661	16.8845	3.28934	0	0.86248	1.22632	0.277425	2.36623				1.94298	0.423244
Suprasolidus	3.1	20.5	2.39849	0	0.628894	1.48891	0.305338	2.42315		2.85347	18.0401	1.23617	0	0.324129	1.31025	0.281055	1.91544		3.34653	22.9599	3.56081	0	0.93366	1.66758	0.32962	2.93086				2.42315	0.50771
Suprasolidus	3.2	16	2.30624	0	0.604706	1.16208	0.315187	2.08197		2.95592	13.9196	1.28311	0	0.336438	1.01098	0.291146	1.63856		3.44408	18.0804	3.32936	0	0.872974	1.31318	0.339229	2.52538				2.08197	0.443409
Suprasolidus	3.2	17.5	2.62911	0	0.689365	1.27102	0.315187	2.27558		2.95362	15.2908	1.55214	0	0.406977	1.11057	0.29092	1.80847		3.44638	19.7092	3.70609	0	0.971753	1.43148	0.339455	2.74268				2.27558	0.467108
Suprasolidus	3.6	20.2	2.90586	0	0.76193	1.46713	0.354586	2.58364		3.33339	17.7647	1.73695	0	0.455435	1.29025	0.328326	2.07401		3.86661	22.6353	4.07477	0	1.06842	1.644	0.380845	3.09327				2.58364	0.50963
Suprasolidus	3.1	20.1	2.49074	0	0.653083	1.45986	0.305338	2.41828		2.85402	17.673	1.33856	0	0.350976	1.28359	0.28111	1.91568		3.34598	22.527	3.64291	0	0.955189	1.63613	0.329565	2.92089				2.41828	0.502606
Suprasolidus	4	23.2	2.90586	0	0.76193	1.68502	0.393984	2.84093		3.71376	20.522	1.64423	0	0.431124	1.49051	0.365791	2.28743		4.28624	25.878	4.16749	0	1.09274	1.87952	0.422177	3.39443				2.84093	0.5535
Suprasolidus	3.2	19.8	2.49074	0	0.653083	1.43807	0.315187	2.40634		2.95035	17.3978	1.34679	0	0.353134	1.2636	0.290598	1.90733		3.44965	22.2022	3.63469	0	0.953031	1.61255	0.339776	2.90535				2.40634	0.49901
Suprasolidus	5.1	14.8	2.62911	0	0.689365	1.07492	0.50233	2.26662		4.7846	12.824	1.6146	0	0.423356	0.931405	0.471264	1.82602		5.4154	16.776	3.64362	0	0.955373	1.21844	0.533396	2.70721				2.26662	0.440594
Suprasolidus	4.1	20.9	2.58299	0	0.677271	1.51797	0.403834	2.59907		3.81331	18.4073	1.39566	0	0.365949	1.33692	0.375596	2.07846		4.38669	23.3927	3.77031	0	0.988593	1.69901	0.432071	3.11968				2.59907	0.520607
Suprasolidus	4	18.7	2.81361	0	0.737741	1.35818	0.393984	2.48991		3.71987	16.3894	1.68821	0	0.442657	1.19036	0.366393	1.99941		4.28013	21.0106	3.93901	0	1.03283	1.526	0.421575	2.9804				2.48991	0.490497
Suprasolidus	3.1	14.7	3.18261	0	0.834494	1.06766	0.305338	2.20749		2.86137	12.7329	2.17776	0	0.571019	0.924792	0.281834	1.77765		3.33863	16.6671	4.18745	0	1.09797	1.21053	0.328841	2.63734				2.20749	0.429848
Suprasolidus	4.3	23.1	2.26011	0	0.592612	1.67775	0.423533	2.6939		4.00314	20.43	1.01201	0	0.265354	1.48383	0.394293	2.14348		4.59686	25.77	3.50822	0	0.91987	1.87168	0.452772	3.24432				2.6939	0.550421
Suprasolidus	3.5	18.4	2.35236	0	0.6168	1.33639	0.344736	2.29793		3.24022	16.1147	1.25144	0	0.328133	1.17041	0.319149	1.81769		3.75978	20.6853	3.45329	0	0.905468	1.50238	0.370323	2.77817				2.29793	0.480239
Suprasolidus	3.3	21.6	2.58299	0	0.677271	1.56881	0.325037	2.57112		3.04353	19.0504	1.38175	0	0.362301	1.38363	0.299775	2.04571		3.55647	24.1496	3.78422	0	0.99224	1.75399	0.350298	3.09652				2.57112	0.525409
Suprasolidus	3.1	21.6	2.72136	0	0.713553	1.56881	0.305338	2.5877		2.85157	19.0504	1.51887	0	0.398254	1.38363	0.280868	2.06275		3.34843	24.1496	3.92385	0	1.02885	1.75399	0.329807	3.11264				2.5877	0.524945
Suprasolidus	4.4	23.5	2.21399	0	0.580518	1.70681	0.433382	2.72071		4.09901	20.7983	0.954065	0	0.25016	1.51058	0.403736	2.16447		4.70099	26.2017	3.47391	0	0.910875	1.90303	0.463029	3.27694				2.72071	0.556231
Suprasolidus	2.6	28.4	2.72136	0	0.713553	2.06269	0.25609	3.03233		2.36037	25.3228	1.32331	0	0.346978	1.8392	0.232487	2.41866		2.83963	31.4772	4.11941	0	1.08013	2.28619	0.279692	3.64601				3.03233	0.613672
Suprasolidus	3.4	33.7	3.41323	0	0.894965	2.44763	0.334886	3.67748		3.11997	30.2436	1.85105	0	0.485355	2.19659	0.307305	2.98925		3.68003	37.1564	4.97541	0	1.30458	2.69867	0.362468	4.36571				3.67748	0.68823
Suprasolidus	3.8	29.1	3.45936	0	0.907059	2.11353	0.374285	3.39488		3.51233	25.971	2.01897	0	0.529384	1.88628	0.34595	2.76161		4.08767	32.229	4.89974	0	1.28473	2.34079	0.40262	4.02814				3.39488	0.633266
Suprasolidus	2.9	15	2.16786	0	0.568424	1.08945	0.285638	1.94351		2.6702	13.0067	1.18214	0	0.309962	0.944677	0.263004	1.51764		3.1298	16.9933	3.15359	0	0.826885	1.23422	0.308273	2.36938				1.94351	0.425869
Suprasolidus	3.8	23.8	2.58299	0	0.677271	1.72859	0.374285	2.78015		3.52065	21.0746	1.31198	0	0.344008	1.53065	0.34677	2.22143		4.07935	26.5254	3.85399	0	1.01053	1.92654	0.4018	3.33887				2.78015	0.558723
Suprasolidus	4.1	23.3	3.09036	0	0.810306	1.69228	0.403834	2.90642		3.8098	20.6141	1.82106	0	0.47749	1.4972	0.37525	2.34994		4.3902	25.9859	4.35966	0	1.14312	1.88736	0.432417	3.4629				2.90642	0.556479
Suprasolidus	3.7	26.5	3.09036	0	0.810306	1.9247	0.364435	3.09944		3.42019	23.5655	1.73148	0	0.454002	1.71156	0.336875	2.50244		3.97981	29.4345	4.44924	0	1.16661	2.13783	0.391995	3.69643				3.09944	0.596996
Suprasolidus	2.4	24	2.62911	0	0.689365	1.74312	0.23639	2.66888		2.17657	21.259	1.3624	0	0.357229	1.54404	0.214383	2.11565		2.62343	26.741	3.89582	0	1.0215	1.9422	0.258398	3.2221				2.66888	0.553224
Suprasolidus	3.4	29.1	3.09036	0	0.810306	2.11353	0.334886	3.25873		3.12758	25.9711	1.65994	0	0.435244	1.88628	0.308054	2.62958		3.67242	32.2289	4.52078	0	1.18537	2.34079	0.361718	3.88787				3.25873	0.629148
Suprasolidus	4.7	28.3	2.72136	0	0.713553	2.05543	0.462931	3.23191		4.3818	25.2301	1.31051	0	0.343622	1.83246	0.43159	2.60768		5.0182	31.3699	4.13221	0	1.08348	2.27839	0.494272	3.85615				3.23191	0.624237
Suprasolidus	3.5	38.8	3.04423	0	0.798212	2.81804	0.344736	3.96099		3.20824	35.0053	1.35558	0	0.355438	2.54243	0.315999	3.21387		3.79176	42.5947	4.73289	0	1.24099	3.09366	0.373473	4.70811				3.96099	0.747123
Suprasolidus	2.9	34	2.99811	0	0.786118	2.46942	0.285638	3.54118		2.63853	30.523	1.43841	0	0.377159	2.21689	0.259885	2.85393		3.16147	37.477	4.5578	0	1.19508	2.72195	0.311392	4.22842				3.54118	0.687246
Suprasolidus	3.2	38.2	3.32098	0	0.870777	2.77447	0.315187	3.96043		2.91998	34.4437	1.64483	0	0.431282	2.50165	0.287606	3.22054		3.48002	41.9563	4.99714	0	1.31027	3.04728	0.342768	4.70032				3.96043	0.739895
Suprasolidus	3.1	31.2	2.85974	0	0.749836	2.26606	0.305338	3.32123		2.83577	27.919	1.37718	0	0.361104	2.02776	0.279312	2.66817		3.36423	34.481	4.34229	0	1.13857	2.50436	0.331364	3.97429				3.32123	0.653057
Suprasolidus	4	25.7	2.72136	0	0.713553	1.86659	0.393984	2.97413		3.71031	22.8267	1.39041	0	0.364571	1.6579	0.365451	2.38792		4.28969	28.5733	4.05232	0	1.06254	2.07528	0.422517	3.56033				2.97413	0.586204
Suprasolidus	3.6	22.9	2.67524	0	0.701459	1.66323	0.354586	2.71927		3.32963	20.2459	1.43067	0	0.375129	1.47046	0.327955	2.17355		3.87037	25.5541	3.9198	0	1.02779	1.85599	0.381216	3.265				2.71927	0.545725
Suprasolidus	3.5	18.8	2.21399	0	0.580518	1.36544	0.344736	2.2907		3.23975	16.4811	1.10392	0	0.289454	1.19702	0.319102	1.80558		3.76025	21.1189	3.32405	0	0.871582	1.53387	0.37037	2.77582				2.2907	0.485122
Suprasolidus	4.5	29.6	2.49074	0	0.653083	2.14985	0.443232	3.24616		4.18697	26.4344	1.04901	0	0.275055	1.91993	0.4124	2.60739		4.81303	32.7656	3.93247	0	1.03111	2.37976	0.474064	3.88494				3.24616	0.638776
Suprasolidus	3.5	20.6	2.49074	0	0.653083	1.49618	0.344736	2.494		3.23703	18.1319	1.31985	0	0.346071	1.31692	0.318835	1.98182		3.76297	23.0681	3.66162	0	0.960094	1.67544	0.370637	3.00617				2.494	0.512174
Suprasolidus	4.2	25.2	2.07561	0	0.544235	1.83028	0.413683	2.78819		3.904	22.3653	0.769887	0	0.201868	1.62439	0.384528	2.21079		4.496	28.0347	3.38134	0	0.886603	2.03616	0.442838	3.3656				2.78819	0.577407
Suprasolidus	4	29.1	2.35236	0	0.6168	2.11353	0.393984	3.12432		3.70553	25.9711	0.930891	0	0.244084	1.88628	0.36498	2.49534		4.29447	32.2289	3.77383	0	0.989517	2.34079	0.422988	3.75329				3.12432	0.628974
Suprasolidus	4.1	24.7	2.49074	0	0.653083	1.79396	0.403834	2.85088		3.80815	21.9041	1.1926	0	0.312704	1.59089	0.375088	2.27869		4.39185	27.4959	3.78888	0	0.993461	1.99703	0.432579	3.42307				2.85088	0.572191
Suprasolidus	3.9	26.6	2.67524	0	0.701459	1.93196	0.384134	3.01755		3.61274	23.6579	1.31996	0	0.3461	1.71827	0.355841	2.42022		4.18726	29.5421	4.03051	0	1.05682	2.14564	0.412428	3.61489				3.01755	0.597336
Suprasolidus	3.3	25.5	2.30624	0	0.604706	1.85207	0.325037	2.78181		3.03765	22.6422	0.994687	0	0.260811	1.6445	0.299196	2.20451		3.56235	28.3578	3.61779	0	0.948601	2.05963	0.350878	3.35911				2.78181	0.5773
Suprasolidus	3.5	26	2.95198	0	0.774024	1.88838	0.344736	3.00714		3.22869	23.1037	1.6118	0	0.422622	1.67802	0.318013	2.41866		3.77131	28.8963	4.29217	0	1.12543	2.09874	0.371459	3.59562				3.00714	0.588483
Suprasolidus	1.9	25.3	2.30624	0	0.604706	1.83754	0.187142	2.62939		1.69505	22.4577	1.01081	0	0.265038	1.6311	0.166956	2.0631		2.10495	28.1423	3.60167	0	0.944374	2.04397	0.207329	3.19568				2.62939	0.56629
Suprasolidus	2.6	27.1	2.81361	0	0.737741	1.96827	0.25609	2.9621		2.36265	24.1201	1.45109	0	0.380483	1.75185	0.232712	2.36504		2.83735	30.0799	4.17613	0	1.095	2.1847	0.279467	3.55917				2.9621	0.597064
Suprasolidus	3.4	23.7	1.89112	0	0.495859	1.72133	0.334886	2.55208		3.13674	20.9826	0.639957	0	0.1678	1.52396	0.308957	2.00072		3.66326	26.4174	3.14227	0	0.823918	1.9187	0.360816	3.10343				2.55208	0.551356
Suprasolidus	3.5	18.7	2.21399	0	0.580518	1.35818	0.344736	2.28343		3.23988	16.3895	1.10699	0	0.290257	1.19037	0.319116	1.79974		3.76012	21.0105	3.32099	0	0.870779	1.526	0.370356	2.76713				2.28343	0.483696
Suprasolidus	3.8	21.8	2.35236	0	0.6168	1.58333	0.374285	2.57442		3.52363	19.2342	1.14559	0	0.300379	1.39698	0.347063	2.04442		4.07637	24.3658	3.55913	0	0.933221	1.76969	0.401506	3.10442				2.57442	0.529997
Suprasolidus	3.8	20.4	1.66049	0	0.435388	1.48165	0.374285	2.29133		3.52597	17.9483	0.510287	0	0.1338	1.30359	0.347294	1.78468		4.07403	22.8517	2.8107	0	0.736977	1.65972	0.401276	2.79797				2.29133	0.506646
Suprasolidus	3.6	21.9	2.53686	0	0.665177	1.5906	0.354586	2.61036		3.33117	19.3261	1.325	0	0.347422	1.40366	0.328107	2.07918		3.86883	24.4739	3.74872	0	0.982932	1.77754	0.381064	3.14153				2.61036	0.531174
Suprasolidus	3.3	17.6	2.53686	0	0.665177	1.27829	0.325037	2.2685		3.04939	15.3823	1.45806	0	0.38231	1.11722	0.300353	1.79988		3.55061	19.8177	3.61566	0	0.948044	1.43936	0.349721	2.73712				2.2685	0.468621
Suprasolidus	4	22.8	2.39849	0	0.628894	1.65596	0.393984	2.67884		3.71459	20.1539	1.15913	0	0.30393	1.46378	0.365872	2.13358		4.28541	25.4461	3.63784	0	0.953858	1.84815	0.422096	3.22411				2.67884	0.545263
Suprasolidus	4.3	22.5	2.85974	0	0.749836	1.63417	0.423533	2.80754		4.00364	19.8778	1.61713	0	0.424018	1.44373	0.394342	2.26209		4.59636	25.1222	4.10234	0	1.07565	1.82462	0.452723	3.353				2.80754	0.545457
Suprasolidus	3.8	21.7	1.89112	0	0.495859	1.57607	0.374285	2.44621		3.52403	19.1423	0.696714	0	0.182682	1.39031	0.347103	1.92009		4.07597	24.2577	3.08552	0	0.809036	1.76184	0.401467	2.97234				2.44621	0.526125
Suprasolidus	3	17.6	2.62911	0	0.689365	1.27829	0.295488	2.26314		2.76187	15.3823	1.55096	0	0.406669	1.11722	0.272033	1.79592		3.23813	19.8177	3.70726	0	0.97206	1.43936	0.318943	2.73036				2.26314	0.467219
Suprasolidus	3.7	18.7	2.76749	0	0.725647	1.35818	0.364435	2.44826		3.43158	16.3894	1.64601	0	0.431592	1.19036	0.337997	1.95995		3.96842	21.0106	3.88896	0	1.0197	1.526	0.390873	2.93658				2.44826	0.488312
Suprasolidus	2.7	18.6	1.56824	0	0.4112	1.35092	0.265939	2.02806		2.47383	16.298	0.485753	0	0.127367	1.18372	0.243662	1.55475		2.92617	20.902	2.65073	0	0.695034	1.51812	0.288216	2.50137				2.02806	0.473308
Suprasolidus	3.1	22.2	2.39849	0	0.628894	1.61239	0.305338	2.54662		2.85083	19.602	1.18479	0	0.310656	1.42369	0.280795	2.01515		3.34917	24.798	3.61219	0	0.947132	1.80108	0.32988	3.07809				2.54662	0.531472
Suprasolidus	4.7	26.1	2.58299	0	0.677271	1.89564	0.462931	3.03585		4.38483	23.196	1.23748	0	0.324473	1.68472	0.431888	2.44109		5.01517	29.004	3.92849	0	1.03007	2.10656	0.493974	3.6306				3.03585	0.59476
Suprasolidus	4.6	22.9	2.76749	0	0.725647	1.66323	0.453082	2.84196		4.29241	20.2458	1.51242	0	0.396563	1.47046	0.422786	2.2898		4.90759	25.5542	4.02255	0	1.05473	1.856	0.483378	3.39411				2.84196	0.552152
Suprasolidus	4.4	24.1	2.49074	0	0.653083	1.75038	0.433382	2.83685		4.09807	21.351	1.20769	0	0.316661	1.55072	0.403643	2.27103		4.70193	26.849	3.77379	0	0.989505	1.95004	0.463122	3.40267				2.83685	0.565823
Suprasolidus	3.8	22.1	2.76749	0	0.725647	1.60512	0.374285	2.70506		3.52298	19.51	1.54304	0	0.404593	1.41701	0.346999	2.1686		4.07702	24.69	3.99193	0	1.0467	1.79324	0.40157	3.24151				2.70506	0.536453
Suprasolidus	3.9	20.3	2.76749	0	0.725647	1.47439	0.384134	2.58417		3.62162	17.8565	1.59594	0	0.418464	1.29691	0.356715	2.07209		4.17838	22.7435	3.93903	0	1.03283	1.65186	0.411554	3.09625				2.58417	0.512078
Suprasolidus	4	23.8	2.12174	0	0.55633	1.72859	0.393984	2.67891		3.71333	21.0746	0.85813	0	0.225006	1.53065	0.365748	2.1214		4.28667	26.5254	3.38535	0	0.887654	1.92654	0.42222	3.23641				2.67891	0.557504
Suprasolidus	4.1	24	1.98336	0	0.520047	1.74312	0.403834	2.667		3.8094	21.2589	0.715613	0	0.187637	1.54403	0.375211	2.10688		4.3906	26.7411	3.25112	0	0.852457	1.94221	0.432456	3.22712				2.667	0.56012
Suprasolidus	4.1	22.8	2.39849	0	0.628894	1.65596	0.403834	2.68869		3.81084	20.1539	1.15827	0	0.303703	1.46378	0.375353	2.14283		4.38916	25.4461	3.63871	0	0.954086	1.84815	0.432315	3.23455				2.68869	0.54586
Suprasolidus	3.8	17.6	3.13648	0	0.8224	1.27829	0.374285	2.47497		3.52889	15.3822	2.03841	0	0.534481	1.11721	0.347582	1.99927		4.07111	19.8178	4.23455	0	1.11032	1.43936	0.400988	2.95067				2.47497	0.475699
Suprasolidus	3.8	19.9	2.72136	0	0.713553	1.44534	0.374285	2.53318		3.52606	17.4895	1.56379	0	0.410032	1.27026	0.347303	2.02759		4.07394	22.3105	3.87893	0	1.01707	1.62041	0.401267	3.03876				2.53318	0.505581
Suprasolidus	3.4	19.4	2.67524	0	0.701459	1.40902	0.334886	2.44537		3.14267	17.031	1.53748	0	0.403135	1.23696	0.30954	1.94963		3.65733	21.769	3.81299	0	0.999783	1.58109	0.360233	2.9411				2.44537	0.495734
Suprasolidus	4.4	20.8	3.41323	0	0.894965	1.5107	0.433382	2.83905		4.10195	18.3154	2.2077	0	0.578869	1.33024	0.404026	2.31314		4.69805	23.2846	4.61876	0	1.21106	1.69116	0.462739	3.36496				2.83905	0.525912
Suprasolidus	3.8	18.7	2.58299	0	0.677271	1.35818	0.374285	2.40974		3.52775	16.3894	1.46481	0	0.384081	1.19036	0.347469	1.92191		4.07225	21.0106	3.70116	0	0.970461	1.526	0.401101	2.89756				2.40974	0.487825
Suprasolidus	3	15.8	1.93724	0	0.507953	1.14755	0.295488	1.951		2.76492	13.737	0.931185	0	0.244161	0.997716	0.272333	1.51421		3.23508	17.863	2.9433	0	0.771745	1.29739	0.318643	2.38778				1.951	0.436785
Suprasolidus	4.6	24.3	2.44461	0	0.640988	1.76491	0.453082	2.85898		4.29074	21.5353	1.15492	0	0.302824	1.56411	0.422621	2.28955		4.90926	27.0647	3.73431	0	0.979153	1.96571	0.483542	3.4284				2.85898	0.569426
Suprasolidus	4.4	24.4	2.07561	0	0.544235	1.77217	0.433382	2.74979		4.09787	21.6275	0.791748	0	0.2076	1.57081	0.403624	2.18203		4.70213	27.1725	3.35948	0	0.880871	1.97354	0.463141	3.31755				2.74979	0.567761
Suprasolidus	5	18.2	2.67524	0	0.701459	1.32187	0.49248	2.51581		4.68431	15.9313	1.55845	0	0.408634	1.15709	0.461386	2.02711		5.31569	20.4687	3.79202	0	0.994284	1.48664	0.523574	3.0045				2.51581	0.488692
Suprasolidus	5.7	17.7	1.98336	0	0.520047	1.28555	0.561427	2.36703		5.36248	15.4736	0.890534	0	0.233502	1.12385	0.528183	1.88554		6.03752	19.9264	3.0762	0	0.806592	1.44725	0.594672	2.84852				2.36703	0.48149
Suprasolidus	3.3	11.9	1.75274	0	0.459577	0.864297	0.325037	1.64891		3.05729	10.183	0.869787	0	0.228062	0.739588	0.301131	1.26878		3.54271	13.617	2.63569	0	0.691091	0.989006	0.348943	2.02904				1.64891	0.380129
Suprasolidus	4.4	21.6	2.35236	0	0.6168	1.56881	0.433382	2.61899		4.10144	19.0503	1.14623	0	0.300548	1.38362	0.403976	2.08815		4.69856	24.1497	3.55849	0	0.933053	1.75399	0.462789	3.14983				2.61899	0.530843
Suprasolidus	4.1	21.4	1.89112	0	0.495859	1.55428	0.403834	2.45397		3.81301	18.8666	0.703093	0	0.184354	1.37028	0.375567	1.9302		4.38699	23.9334	3.07914	0	0.807364	1.73828	0.432101	2.97775				2.45397	0.523774
Suprasolidus	4.2	22.7	2.21399	0	0.580518	1.6487	0.413683	2.6429		3.90737	20.0619	0.979578	0	0.25685	1.45709	0.38486	2.0988		4.49263	25.3381	3.4484	0	0.904186	1.84031	0.442506	3.187				2.6429	0.544099
Suprasolidus	4.3	25.4	2.62911	0	0.689365	1.8448	0.423533	2.9577		3.99982	22.5498	1.30622	0	0.342496	1.63779	0.393966	2.37425		4.60018	28.2502	3.95201	0	1.03623	2.05181	0.4531	3.54115				2.9577	0.583447
Suprasolidus	2.8	18.6	1.79887	0	0.471671	1.35092	0.275789	2.09838		2.56939	16.2979	0.710548	0	0.186309	1.18372	0.253074	1.6231		3.03061	20.9021	2.88718	0	0.757033	1.51812	0.298503	2.57365				2.09838	0.475275
Suprasolidus	3.5	22.7	2.07561	0	0.544235	1.6487	0.344736	2.53767		3.23419	20.0619	0.850023	0	0.22288	1.4571	0.318555	1.99853		3.76581	25.3381	3.30121	0	0.865591	1.8403	0.370917	3.07681				2.53767	0.539139
Suprasolidus	2.8	21.5	1.89112	0	0.495859	1.56155	0.275789	2.33319		2.56467	18.9586	0.711482	0	0.186554	1.37696	0.25261	1.81613		3.03533	24.0414	3.07075	0	0.805164	1.74613	0.298968	2.85026				2.33319	0.517068
Suprasolidus	3.6	21.5	2.62911	0	0.689365	1.56155	0.354586	2.6055		3.3317	18.9585	1.42728	0	0.37424	1.37695	0.328159	2.07935		3.8683	24.0415	3.83094	0	1.00449	1.74614	0.381013	3.13164				2.6055	0.526143
Suprasolidus	3.4	20.1	2.39849	0	0.628894	1.45986	0.334886	2.42364		3.14182	17.673	1.24565	0	0.326614	1.28359	0.309457	1.91966		3.65818	22.527	3.55133	0	0.931175	1.63614	0.360316	2.92763				2.42364	0.503983
Suprasolidus	3.1	19	1.84499	0	0.483765	1.37997	0.305338	2.16907		2.85609	16.6644	0.740539	0	0.194173	1.21033	0.281313	1.68582		3.34391	21.3356	2.94944	0	0.773357	1.54961	0.329362	2.65232				2.16907	0.483252
Suprasolidus	3.2	22.5	1.98336	0	0.520047	1.63417	0.315187	2.46941		2.94655	19.878	0.768171	0	0.201418	1.44374	0.290223	1.93538		3.45345	25.122	3.19856	0	0.838677	1.82461	0.340151	3.00344				2.46941	0.534032
Suprasolidus	2.9	20.6	1.75274	0	0.459577	1.49618	0.285638	2.24139		2.66203	18.132	0.602638	0	0.158015	1.31692	0.2622	1.73714		3.13797	23.068	2.90284	0	0.761139	1.67543	0.309077	2.74565				2.24139	0.504255
Suprasolidus	3.3	21.4	2.16786	0	0.568424	1.55428	0.325037	2.44774		3.04408	18.8666	0.98136	0	0.257317	1.37028	0.299829	1.92743		3.55592	23.9334	3.35437	0	0.879531	1.73828	0.350244	2.96805				2.44774	0.520312
Suprasolidus	4.1	30.2	2.44461	0	0.640988	2.19343	0.403834	3.23825		3.80023	26.9908	0.98991	0	0.259559	1.96034	0.374308	2.59421		4.39977	33.4092	3.89932	0	1.02242	2.42651	0.433359	3.88228				3.23825	0.644037
Suprasolidus	3.9	23.8	2.39849	0	0.628894	1.72859	0.384134	2.74162		3.61695	21.0746	1.13032	0	0.296376	1.53065	0.356255	2.18328		4.18305	26.5254	3.66665	0	0.961413	1.92654	0.412014	3.29997				2.74162	0.558343
Suprasolidus	3.8	26.3	2.90586	0	0.76193	1.91017	0.374285	3.04638		3.51681	23.3808	1.55557	0	0.407877	1.69814	0.346392	2.45241		4.08319	29.2192	4.25615	0	1.11598	2.12219	0.402178	3.64035				3.04638	0.59397
Suprasolidus	4	20.6	2.12174	0	0.55633	1.49618	0.393984	2.44649		3.71774	18.1318	0.954145	0	0.250181	1.31692	0.366183	1.93328		4.28226	23.0682	3.28933	0	0.862478	1.67544	0.421785	2.9597				2.44649	0.513212
Suprasolidus	3.4	19.3	2.02949	0	0.532141	1.40176	0.334886	2.26879		3.14319	16.9393	0.909058	0	0.238359	1.2303	0.309592	1.77825		3.65681	21.6607	3.14992	0	0.825924	1.57321	0.360181	2.75932				2.26879	0.490532
Suprasolidus	3.6	22.9	2.44461	0	0.640988	1.66323	0.354586	2.6588		3.32976	20.2459	1.20478	0	0.3159	1.47046	0.327968	2.11433		3.87024	25.5541	3.68444	0	0.966077	1.85599	0.381203	3.20327				2.6588	0.54447
Suprasolidus	3	18.7	2.81361	0	0.737741	1.35818	0.295488	2.39141		2.76011	16.3895	1.69755	0	0.445105	1.19037	0.27186	1.90733		3.23989	21.0105	3.92967	0	1.03038	1.526	0.319116	2.87549				2.39141	0.484079
Suprasolidus	3.5	23.5	2.53686	0	0.665177	1.70681	0.344736	2.71672		3.23273	20.7983	1.27817	0	0.335142	1.51058	0.318411	2.16414		3.76727	26.2017	3.79555	0	0.995211	1.90303	0.371061	3.2693				2.71672	0.552582
Suprasolidus	4.2	22.6	2.58299	0	0.677271	1.64144	0.413683	2.73239		3.90731	19.9698	1.34407	0	0.352421	1.45041	0.384855	2.18768		4.49269	25.2302	3.82191	0	1.00212	1.83247	0.442512	3.2771				2.73239	0.544707
Suprasolidus	3.4	22.7	2.35236	0	0.6168	1.6487	0.334886	2.60039		3.138	20.0619	1.12208	0	0.294214	1.4571	0.30908	2.06039		3.662	25.3381	3.58265	0	0.939386	1.8403	0.360693	3.14038				2.60039	0.539996
Suprasolidus	4.6	28.6	2.12174	0	0.55633	2.07722	0.453082	3.08663		4.28509	25.5079	0.713862	0	0.187178	1.85264	0.422065	2.46188		4.91491	31.6921	3.52962	0	0.925481	2.3018	0.484099	3.71138				3.08663	0.624746
Suprasolidus	3.3	29.6	2.95198	0	0.774024	2.14985	0.325037	3.24891		3.03068	26.4345	1.51084	0	0.39615	1.91994	0.29851	2.6146		3.56932	32.7655	4.39313	0	1.1519	2.37976	0.351564	3.88322				3.24891	0.634313
Suprasolidus	4.4	26.7	2.53686	0	0.665177	1.93922	0.433382	3.03778		4.09449	23.7503	1.17735	0	0.308707	1.72498	0.403291	2.43698		4.70551	29.6497	3.89637	0	1.02165	2.15346	0.463474	3.63858				3.03778	0.600798
Suprasolidus	4	23.4	2.62911	0	0.689365	1.69954	0.393984	2.78289		3.71363	20.7062	1.36729	0	0.35851	1.50389	0.365777	2.22818		4.28637	26.0938	3.89093	0	1.02022	1.89519	0.422191	3.3376				2.78289	0.554713
Suprasolidus	2.1	14.9	4.79698	0	1.25779	1.08219	0.206842	2.54682		1.90409	12.9154	3.74975	0	0.983201	0.938043	0.187545	2.10879		2.29591	16.8846	5.8442	0	1.53238	1.22633	0.226138	2.98485				2.54682	0.438029
Suprasolidus	3.2	19.7	3.68998	0	0.96753	1.43081	0.315187	2.71353		2.94981	17.306	2.52119	0	0.661069	1.25694	0.290545	2.20855		3.45019	22.094	4.85877	0	1.27399	1.60469	0.33983	3.21851				2.71353	0.504979
Suprasolidus	3.4	28.1	2.30624	0	0.604706	2.0409	0.334886	2.9805		3.12961	25.0451	0.918552	0	0.240848	1.81903	0.308254	2.36813		3.67039	31.1549	3.69392	0	0.968564	2.26278	0.361519	3.59286				2.9805	0.612366
Suprasolidus	3.1	22.1	2.35236	0	0.6168	1.60512	0.305338	2.52726		2.85101	19.5101	1.14262	0	0.299601	1.41702	0.280813	1.99743		3.34899	24.6899	3.5621	0	0.934	1.79323	0.329862	3.05709				2.52726	0.529831
Suprasolidus	3.4	15.7	1.61437	0	0.423294	1.14029	0.334886	1.89847		3.14841	13.6456	0.614896	0	0.161229	0.991083	0.310105	1.46242		3.65159	17.7544	2.61384	0	0.68536	1.2895	0.359667	2.33453				1.89847	0.436055
Suprasolidus	3.2	18.7	2.16786	0	0.568424	1.35818	0.315187	2.24179		2.95217	16.3895	1.0647	0	0.27917	1.19037	0.290777	1.76032		3.44783	21.0105	3.27102	0	0.857677	1.52599	0.339597	2.72327				2.24179	0.481476
Suprasolidus	3.5	20.3	2.12174	0	0.55633	1.47439	0.344736	2.37545		3.23768	17.8565	0.967839	0	0.253772	1.29692	0.318898	1.86959		3.76232	22.7435	3.27564	0	0.858888	1.65186	0.370574	2.88132				2.37545	0.505865
Suprasolidus	4.5	25	2.16786	0	0.568424	1.81575	0.443232	2.82741		4.19346	22.1808	0.863792	0	0.22649	1.61099	0.413039	2.25052		4.80654	27.8192	3.47194	0	0.910357	2.02051	0.473425	3.40429				2.82741	0.576888
Suprasolidus	3.2	18.8	2.39849	0	0.628894	1.36544	0.315187	2.30953		2.95189	16.4811	1.2871	0	0.337483	1.19702	0.290749	1.82525		3.44811	21.1189	3.50988	0	0.920305	1.53387	0.339625	2.7938				2.30953	0.484272
Suprasolidus	3.5	17.6	2.12174	0	0.55633	1.27829	0.344736	2.17935		3.24145	15.3823	1.05061	0	0.275475	1.11722	0.31927	1.71196		3.75855	19.8177	3.19287	0	0.837184	1.43936	0.370202	2.64674				2.17935	0.46739
Suprasolidus	3.3	18.7	2.16786	0	0.568424	1.35818	0.325037	2.25164		3.04805	16.3895	1.06377	0	0.278925	1.19037	0.300221	1.76951		3.55195	21.0105	3.27196	0	0.857922	1.52599	0.349853	2.73377				2.25164	0.482128
Suprasolidus	5.7	29.5	3.22873	0	0.846589	2.14259	0.561427	3.5506		5.34824	26.3416	1.7676	0	0.463473	1.91319	0.52678	2.90344		6.05176	32.6584	4.68986	0	1.2297	2.37198	0.596075	4.19776				3.5506	0.647156
Suprasolidus	3.4	17.6	1.75274	0	0.459577	1.27829	0.334886	2.07275		3.14575	15.3824	0.690852	0	0.181145	1.11722	0.309844	1.60821		3.65425	19.8176	2.81463	0	0.738009	1.43935	0.359929	2.53729				2.07275	0.464541
Suprasolidus	4.1	30.2	2.58299	0	0.677271	2.19343	0.403834	3.27453		3.80017	26.9908	1.12587	0	0.295209	1.96034	0.374301	2.62985		4.39983	33.4092	4.0401	0	1.05933	2.42651	0.433366	3.91921				3.27453	0.644677
Suprasolidus	3.8	25.5	1.84499	0	0.483765	1.85207	0.374285	2.71011		3.51857	22.6422	0.537959	0	0.141055	1.6445	0.346565	2.13212		4.08143	28.3578	3.15202	0	0.826474	2.05963	0.402005	3.28811				2.71011	0.577994
Suprasolidus	3	17.5	2.67524	0	0.701459	1.27102	0.295488	2.26797		2.76198	15.2908	1.59905	0	0.419277	1.11057	0.272044	1.8019		3.23802	19.7092	3.75143	0	0.983641	1.43148	0.318932	2.73405				2.26797	0.466077
Suprasolidus	3.5	26.8	2.76749	0	0.725647	1.94648	0.344736	3.01687		3.22755	23.8428	1.40782	0	0.369137	1.7317	0.317901	2.41874		3.77245	29.7572	4.12715	0	1.08216	2.16127	0.371571	3.615				3.01687	0.59813
Suprasolidus	3.7	22.6	2.53686	0	0.665177	1.64144	0.364435	2.67105		3.42625	19.9699	1.30323	0	0.341712	1.45041	0.337472	2.1296		3.97375	25.2301	3.7705	0	0.988641	1.83246	0.391398	3.2125				2.67105	0.541452
Suprasolidus	3.6	25.8	2.53686	0	0.665177	1.87385	0.354586	2.89362		3.32537	22.9191	1.20977	0	0.317208	1.66461	0.327535	2.30935		3.87463	28.6809	3.86395	0	1.01315	2.0831	0.381636	3.47788				2.89362	0.584262
Suprasolidus	3.7	29.2	2.58299	0	0.677271	2.1208	0.364435	3.1625		3.41634	26.0637	1.15685	0	0.303332	1.89301	0.336496	2.53284		3.98366	32.3363	4.00912	0	1.05121	2.34858	0.392374	3.79217				3.1625	0.629664
Suprasolidus	1.9	29.4	1.79887	0	0.471671	2.13532	0.187142	2.79414		1.68706	26.2492	0.393012	0	0.10305	1.90648	0.166168	2.1757		2.11294	32.5508	3.20472	0	0.840292	2.36416	0.208117	3.41257				2.79414	0.618435
Suprasolidus	1.6	16.2	1.47599	0	0.387012	1.17661	0.157594	1.72121		1.42688	14.1025	0.480731	0	0.12605	1.02426	0.140542	1.29086		1.77312	18.2975	2.47125	0	0.647974	1.32895	0.174645	2.15157				1.72121	0.430355
Suprasolidus	1.9	25.9	1.84499	0	0.483765	1.88112	0.187142	2.55202		1.69418	23.0115	0.540379	0	0.14169	1.67133	0.16687	1.97989		2.10582	28.7885	3.1496	0	0.82584	2.09091	0.207414	3.12416				2.55202	0.572136
Suprasolidus	1.8	35.6	1.89112	0	0.495859	2.58563	0.177293	3.25878		1.57797	32.0147	0.312953	0	0.0820577	2.32522	0.155424	2.56271		2.02203	39.1853	3.46928	0	0.90966	2.84603	0.199162	3.95485				3.25878	0.696074
Suprasolidus	1.5	11.8	1.01474	0	0.266071	0.857034	0.147744	1.27085		1.34021	10.0923	0.173319	0	0.045445	0.733003	0.132006	0.910454		1.65979	13.5077	1.85617	0	0.486696	0.981065	0.163482	1.63124				1.27085	0.360395
Suprasolidus	0.5	5.5	0.876371	0	0.229788	0.399465	0.049248	0.678501		0.401009	4.38408	0.249701	0	0.0654727	0.318416	0.0394977	0.423386		0.598991	6.61592	1.50304	0	0.394104	0.480514	0.0589983	0.933616				0.678501	0.255115
Suprasolidus	1.3	8.7	1.06087	0	0.278165	0.631881	0.128045	1.03809		1.15526	7.27851	0.320191	0	0.0839554	0.528638	0.113789	0.726382		1.44474	10.1215	1.80155	0	0.472374	0.735124	0.142301	1.3498				1.03809	0.311708
Suprasolidus	2.6	22.8	1.56824	0	0.4112	1.65596	0.25609	2.32325		2.37106	20.154	0.35689	0	0.0935782	1.46379	0.23354	1.79091		2.82894	25.446	2.77959	0	0.728822	1.84814	0.278639	2.8556				2.32325	0.532347
Suprasolidus	2.9	23.8	1.15312	0	0.302353	1.72859	0.285638	2.31659		2.65721	21.0748	-0.0834463	0	-0.02188	1.53066	0.261724	1.7705		3.14279	26.5252	2.38968	0	0.626586	1.92653	0.309553	2.86267				2.31659	0.546081
Suprasolidus	0.8	9.4	1.47599	0	0.387012	0.682722	0.0787968	1.14853		0.677701	7.91305	0.705123	0	0.184886	0.574725	0.0667509	0.826362		0.922299	10.887	2.24686	0	0.589137	0.790719	0.0908427	1.4707				1.14853	0.322169
Suprasolidus	1.5	16.8	1.19924	0	0.314447	1.22018	0.147744	1.68238		1.33045	14.6509	0.191708	0	0.0502666	1.06409	0.131044	1.2454		1.66955	18.9491	2.20678	0	0.578628	1.37628	0.164444	2.11935				1.68238	0.436972
Suprasolidus	1.2	14.3	1.29149	0	0.338635	1.03861	0.118195	1.49544		1.04907	12.3685	0.36464	0	0.0956103	0.898322	0.103329	1.09726		1.35093	16.2315	2.21835	0	0.58166	1.1789	0.133061	1.89362				1.49544	0.398178
Suprasolidus	2.4	16.5	1.15312	0	0.302353	1.1984	0.23639	1.73714		2.19061	14.3766	0.148568	0	0.0389552	1.04417	0.215767	1.29889		2.60939	18.6234	2.15767	0	0.565751	1.35262	0.257014	2.17538				1.73714	0.438245
Suprasolidus	2.3	18.5	1.19924	0	0.314447	1.34366	0.226541	1.88464		2.09164	16.2064	0.131094	0	0.0343733	1.17707	0.206018	1.41746		2.50836	20.7936	2.26739	0	0.594521	1.51024	0.247063	2.35182				1.88464	0.467179
Suprasolidus	1.3	14.1	1.19924	0	0.314447	1.02408	0.128045	1.46657		1.145	12.1861	0.280304	0	0.0734969	0.88508	0.112778	1.07135		1.455	16.0139	2.11818	0	0.555397	1.16309	0.143312	1.8618				1.46657	0.39522
Suprasolidus	1.3	11.5	0.922495	0	0.241882	0.835245	0.128045	1.20517		1.15038	9.8196	0.094953	0	0.0248971	0.713198	0.113308	0.851403		1.44962	13.1804	1.75004	0	0.458868	0.957292	0.142782	1.55894				1.20517	0.35377
Suprasolidus	1.6	18.3	1.01474	0	0.266071	1.32913	0.157594	1.75279		1.42312	16.0233	-0.0376638	0	-0.00987562	1.16377	0.140172	1.29407		1.77688	20.5767	2.06715	0	0.542017	1.49448	0.175015	2.21152				1.75279	0.458723
Suprasolidus	1.6	14.5	0.96862	0	0.253977	1.05314	0.157594	1.46471		1.4306	12.5508	0.0396662	0	0.0104007	0.911567	0.140909	1.06288		1.7694	16.4492	1.89757	0	0.497552	1.1947	0.174278	1.86653				1.46471	0.401829
Suprasolidus	1.3	14.9	1.24537	0	0.326541	1.08219	0.128045	1.53677		1.14332	12.9157	0.299469	0	0.078522	0.938066	0.112612	1.1292		1.45668	16.8843	2.19127	0	0.574561	1.22631	0.143478	1.94435				1.53677	0.407573
Suprasolidus	1.7	20.1	1.19924	0	0.314447	1.45986	0.167443	1.94175		1.51494	17.6732	0.0853973	0	0.0223915	1.28361	0.149215	1.45521		1.88506	22.5268	2.31309	0	0.606503	1.63612	0.185671	2.42829				1.94175	0.486542
Suprasolidus	2.3	19.1	1.01474	0	0.266071	1.38723	0.226541	1.87984		2.09074	16.7562	-0.0686562	0	-0.018002	1.217	0.205929	1.40493		2.50926	21.4438	2.09815	0	0.550143	1.55747	0.247152	2.35476				1.87984	0.474917
Suprasolidus	2.7	27.9	0.737996	0	0.193506	2.02638	0.265939	2.48582		2.45853	24.8602	-0.612669	0	-0.160645	1.80559	0.242155	1.8871		2.94147	30.9398	2.08866	0	0.547656	2.24716	0.289723	3.08454				2.48582	0.598718
Suprasolidus	1.7	14.6	0.96862	0	0.253977	1.0604	0.167443	1.48182		1.5258	12.642	0.0355697	0	0.00932655	0.91819	0.150285	1.0778		1.8742	16.558	1.90167	0	0.498627	1.20261	0.184601	1.88583				1.48182	0.404016
Suprasolidus	1.5	18.7	0.876371	0	0.229788	1.35818	0.147744	1.73571		1.32683	16.3897	-0.185307	0	-0.0485884	1.19038	0.130688	1.27248		1.67317	21.0103	1.93805	0	0.508165	1.52598	0.1648	2.19894				1.73571	0.46323
Suprasolidus	2.4	12	1.15312	0	0.302353	0.87156	0.23639	1.4103		2.19751	10.2741	0.292735	0	0.0767563	0.746205	0.216445	1.03941		2.60249	13.7259	2.0135	0	0.52795	0.996915	0.256335	1.7812				1.4103	0.370897
Suprasolidus	3.8	20.7	0.922495	0	0.241882	1.50344	0.374285	2.11961		3.52598	18.2237	-0.222711	0	-0.0583958	1.32359	0.347295	1.61249		4.07402	23.1763	2.0677	0	0.542161	1.68329	0.401275	2.62673				2.11961	0.507119
Suprasolidus	1.3	16	1.10699	0	0.290259	1.16208	0.128045	1.58038		1.14116	13.9198	0.128707	0	0.0337477	1.011	0.1124	1.15715		1.45884	18.0802	2.08528	0	0.54677	1.31316	0.14369	2.00362				1.58038	0.423238
Suprasolidus	3.1	16.5	1.33762	0	0.35073	1.1984	0.305338	1.85446		2.86006	14.3765	0.322277	0	0.0845026	1.04417	0.281705	1.41037		3.33994	18.6235	2.35296	0	0.616957	1.35262	0.328971	2.29855				1.85446	0.444089
Suprasolidus	1.3	22.5	1.52212	0	0.399106	1.63417	0.128045	2.16133		1.12645	19.8781	0.329994	0	0.0865258	1.44375	0.11095	1.64122		1.47355	25.1219	2.71424	0	0.711686	1.8246	0.145139	2.68143				2.16133	0.520102
Suprasolidus	2	47.5	2.44461	0	0.640988	3.44992	0.196992	4.28791		1.74699	43.1882	0.566502	0	0.148539	3.13676	0.172072	3.45737		2.25301	51.8118	4.32272	0	1.13344	3.76309	0.221912	5.11844				4.28791	0.830537
Suprasolidus	1.3	18.6	1.19924	0	0.314447	1.35092	0.128045	1.79341		1.13547	16.2981	0.135623	0	0.035561	1.18373	0.111839	1.33113		1.46453	20.9019	2.26286	0	0.593333	1.51811	0.14425	2.25569				1.79341	0.462279
Suprasolidus	1.7	30.6	1.70662	0	0.447483	2.22248	0.167443	2.8374		1.49245	27.3621	0.269258	0	0.0706005	1.98731	0.147	2.20491		1.90755	33.8379	3.14397	0	0.824364	2.45764	0.187886	3.46989				2.8374	0.632491
Suprasolidus	2	18.8	1.19924	0	0.314447	1.36544	0.196992	1.87688		1.80431	16.4813	0.124099	0	0.0325394	1.19703	0.177718	1.40729		2.19569	21.1187	2.27439	0	0.596355	1.53385	0.216266	2.34648				1.87688	0.469592
Suprasolidus	2	13	1.29149	0	0.338635	0.94419	0.196992	1.47982		1.81437	11.184	0.399668	0	0.104795	0.812295	0.178709	1.0958		2.18563	14.816	2.18332	0	0.572476	1.07609	0.215275	1.86384				1.47982	0.384019
Suprasolidus	2	16	0.96862	0	0.253977	1.16208	0.196992	1.61305		1.80956	13.9198	-0.0122917	0	-0.00322294	1.011	0.178235	1.18601		2.19044	18.0802	1.94953	0	0.511176	1.31316	0.215749	2.04009				1.61305	0.427042
Suprasolidus	2.2	18.8	1.06087	0	0.278165	1.36544	0.216691	1.8603		1.99561	16.4813	-0.0131196	0	-0.00344001	1.19703	0.19656	1.39015		2.40439	21.1187	2.13486	0	0.55977	1.53385	0.236822	2.33045				1.8603	0.470146
Suprasolidus	1.8	14.2	1.15312	0	0.302353	1.03135	0.177293	1.51099		1.62174	12.2773	0.227861	0	0.0597462	0.891698	0.159735	1.11118		1.97826	16.1227	2.07838	0	0.54496	1.17099	0.194851	1.9108				1.51099	0.399813
Suprasolidus	2.2	17.4	1.19924	0	0.314447	1.26376	0.216691	1.7949		1.99796	15.1995	0.166832	0	0.0437442	1.10394	0.196791	1.34448		2.40204	19.6005	2.23166	0	0.58515	1.42358	0.236591	2.24532				1.7949	0.450423
Suprasolidus	2.2	20.1	1.06087	0	0.278165	1.45986	0.216691	1.95472		1.99328	17.6732	-0.0541082	0	-0.0141874	1.2836	0.19633	1.46575		2.40672	22.5268	2.17585	0	0.570517	1.63612	0.237052	2.44369				1.95472	0.488973
Suprasolidus	2	15.3	1.15312	0	0.302353	1.11124	0.196992	1.61058		1.81063	13.2806	0.190643	0	0.0499875	0.964573	0.17834	1.1929		2.18937	17.3194	2.1156	0	0.554719	1.25791	0.215644	2.02827				1.61058	0.417684
Suprasolidus	2.7	17.3	1.06087	0	0.278165	1.2565	0.265939	1.8006		2.47623	15.108	0.0300081	0	0.00786825	1.0973	0.243899	1.34906		2.92377	19.492	2.09173	0	0.548461	1.4157	0.28798	2.25214				1.8006	0.451541
Suprasolidus	3.4	22.1	0.96862	0	0.253977	1.60512	0.334886	2.19399		3.13973	19.5101	-0.216982	0	-0.0568937	1.41702	0.30925	1.66938		3.66027	24.6899	2.15422	0	0.564847	1.79323	0.360522	2.7186				2.19399	0.524609
Suprasolidus	3.4	19.5	1.47599	0	0.387012	1.41629	0.334886	2.13818		3.14324	17.1227	0.360969	0	0.0946478	1.24362	0.309597	1.64787		3.65676	21.8773	2.59102	0	0.679376	1.58895	0.360176	2.6285				2.13818	0.490315
Suprasolidus	2.8	14.9	1.01474	0	0.266071	1.08219	0.275789	1.62405		2.5755	12.9156	0.0604693	0	0.0158553	0.938058	0.253676	1.20759		3.0245	16.8844	1.96902	0	0.516286	1.22632	0.297902	2.0405				1.62405	0.416458
Suprasolidus	3.9	30.6	2.07561	0	0.544235	2.22248	0.384134	3.15085		3.60708	27.362	0.617487	0	0.161908	1.9873	0.355283	2.50449		4.19292	33.838	3.53374	0	0.926563	2.45765	0.412986	3.7972				3.15085	0.646356
Suprasolidus	3.3	26.2	1.29149	0	0.338635	1.90291	0.325037	2.56658		3.03713	23.2885	-0.0225055	0	-0.00590104	1.69144	0.299145	1.98469		3.56287	29.1115	2.60549	0	0.683172	2.11437	0.350928	3.14847				2.56658	0.581889
Suprasolidus	3.9	33	1.66049	0	0.435388	2.39679	0.384134	3.21631		3.60364	29.5921	0.142692	0	0.0374145	2.14928	0.354944	2.54163		4.19636	36.4079	3.17829	0	0.833362	2.6443	0.413325	3.89099				3.21631	0.674679
Suprasolidus	3	32	1.52212	0	0.399106	2.32416	0.295488	3.01875		2.73903	28.6623	0.0402339	0	0.0105495	2.08174	0.269784	2.36207		3.26097	35.3377	3.004	0	0.787663	2.56658	0.321192	3.67543				3.01875	0.65668
Suprasolidus	3.8	29.9	1.84499	0	0.483765	2.17164	0.374285	3.02969		3.51194	26.7126	0.411066	0	0.107783	1.94014	0.345912	2.39384		4.08806	33.0874	3.27892	0	0.859747	2.40313	0.402657	3.66554				3.02969	0.635852
Suprasolidus	3.9	25.5	1.42987	0	0.374918	1.85207	0.384134	2.61112		3.61502	22.6422	0.129363	0	0.0339195	1.6445	0.356065	2.03449		4.18498	28.3578	2.73037	0	0.715916	2.05963	0.412203	3.18775				2.61112	0.576631
Suprasolidus	3.1	26.7	1.52212	0	0.399106	1.93922	0.305338	2.64366		2.84409	23.7504	0.191025	0	0.0500877	1.72499	0.280131	2.05521		3.35591	29.6496	2.85321	0	0.748124	2.15345	0.330544	3.23212				2.64366	0.588451
Suprasolidus	2.8	17.7	1.70662	0	0.447483	1.28555	0.275789	2.00882		2.57084	15.4739	0.648372	0	0.170006	1.12387	0.253218	1.5471		3.02916	19.9261	2.76486	0	0.724959	1.44723	0.29836	2.47055				2.00882	0.461727
Suprasolidus	2.6	23.8	1.42987	0	0.374918	1.72859	0.25609	2.3596		2.36942	21.0748	0.190722	0	0.0500082	1.53066	0.233378	1.81405		2.83058	26.5252	2.66901	0	0.699827	1.92653	0.278801	2.90516				2.3596	0.545555
Suprasolidus	2.6	28.6	1.66049	0	0.435388	2.07722	0.25609	2.7687		2.36069	25.5081	0.275406	0	0.0722127	1.85265	0.232518	2.15738		2.83931	31.6919	3.04558	0	0.798564	2.30178	0.279661	3.38001				2.7687	0.611313
Suprasolidus	3.4	23.2	1.79887	0	0.471671	1.68502	0.334886	2.49157		3.13756	20.5221	0.564463	0	0.148005	1.49052	0.309037	1.94757		3.66244	25.8779	3.03327	0	0.795337	1.87951	0.360735	3.03558				2.49157	0.544008
Suprasolidus	2.9	25.4	1.84499	0	0.483765	1.8448	0.285638	2.61421		2.65408	22.5499	0.548072	0	0.143707	1.6378	0.261416	2.04293		3.14592	28.2501	3.14191	0	0.823823	2.0518	0.30986	3.18549				2.61421	0.57128
Suprasolidus	3	28.2	2.07561	0	0.544235	2.04817	0.295488	2.88789		2.7452	25.1377	0.692102	0	0.181472	1.82575	0.270391	2.27762		3.2548	31.2623	3.45913	0	0.906999	2.27058	0.320585	3.49816				2.88789	0.610274
Suprasolidus	2.5	19.1	1.06087	0	0.278165	1.38723	0.24624	1.91164		2.282	16.7561	-0.0251582	0	-0.00659658	1.217	0.224768	1.43517		2.718	21.4439	2.1469	0	0.562926	1.55747	0.267712	2.38811				1.91164	0.476468
Suprasolidus	2.8	25.3	1.38374	0	0.362824	1.83754	0.275789	2.47615		2.55861	22.4577	0.0987862	0	0.0259022	1.6311	0.252013	1.90902		3.04139	28.1423	2.6687	0	0.699745	2.04398	0.299565	3.04329				2.47615	0.567134
Suprasolidus	2.8	25.6	1.24537	0	0.326541	1.85933	0.275789	2.46166		2.55818	22.7346	-0.0461552	0	-0.0121021	1.65121	0.251971	1.89108		3.04182	28.4654	2.53689	0	0.665185	2.06744	0.299607	3.03224				2.46166	0.570578
Suprasolidus	2.2	29.8	1.75274	0	0.459577	2.16437	0.216691	2.84064		1.97436	26.62	0.334373	0	0.087674	1.93341	0.194467	2.21555		2.42564	32.98	3.17111	0	0.831479	2.39534	0.238916	3.46573				2.84064	0.625089
Suprasolidus	2.7	24.8	1.70662	0	0.447483	1.80122	0.265939	2.51465		2.46335	21.9965	0.431597	0	0.113167	1.5976	0.242631	1.9534		2.93665	27.6035	2.98164	0	0.781798	2.00485	0.289248	3.07589				2.51465	0.561246
Suprasolidus	4.2	25.9	2.53686	0	0.665177	1.88112	0.413683	2.95998		3.90278	23.0113	1.20205	0	0.315183	1.67131	0.384408	2.3709		4.49722	28.7887	3.87168	0	1.01517	2.09092	0.442958	3.54905				2.95998	0.589073
Suprasolidus	3.7	26.5	1.61437	0	0.423294	1.9247	0.364435	2.71242		3.421	23.5656	0.282861	0	0.0741675	1.71157	0.336954	2.12269		3.979	29.4344	2.94587	0	0.772421	2.13782	0.391916	3.30216				2.71242	0.589734
Suprasolidus	1.9	13	1.61437	0	0.423294	0.94419	0.187142	1.55463		1.71875	11.184	0.715355	0	0.187569	0.812294	0.16929	1.16915		2.08125	14.816	2.51338	0	0.659019	1.07609	0.204995	1.9401				1.55463	0.385474
Suprasolidus	3.8	21	2.21399	0	0.580518	1.52523	0.374285	2.48003		3.52482	18.4991	1.03419	0	0.271169	1.34359	0.347181	1.96194		4.07518	23.5009	3.39379	0	0.889867	1.70687	0.401388	2.99812				2.48003	0.51809
Suprasolidus	2.8	23.6	1.66049	0	0.435388	1.71407	0.275789	2.42525		2.56132	20.8905	0.421573	0	0.110538	1.51728	0.25228	1.8801		3.03868	26.3095	2.89941	0	0.760238	1.91086	0.299297	2.97039				2.42525	0.545149
Suprasolidus	2.5	21.1	1.89112	0	0.495859	1.53249	0.24624	2.27459		2.278	18.5911	0.726193	0	0.190411	1.35027	0.224374	1.76506		2.722	23.6089	3.05604	0	0.801307	1.71471	0.268106	2.78413				2.27459	0.509534
Suprasolidus	2.4	23.2	1.98336	0	0.520047	1.68502	0.23639	2.44145		2.17846	20.5222	0.753461	0	0.197561	1.49053	0.214569	1.90266		2.62154	25.8778	3.21327	0	0.842534	1.8795	0.258211	2.98025				2.44145	0.538796
Suprasolidus	2	20.4	1.56824	0	0.4112	1.48165	0.196992	2.08984		1.80102	17.9485	0.435434	0	0.114173	1.3036	0.177393	1.59516		2.19898	22.8515	2.70105	0	0.708227	1.65971	0.216591	2.58453				2.08984	0.494681
Suprasolidus	2.7	22.3	1.89112	0	0.495859	1.61965	0.265939	2.38145		2.46752	19.694	0.687936	0	0.18038	1.43038	0.243041	1.8538		2.93248	24.906	3.09429	0	0.811338	1.80892	0.288838	2.9091				2.38145	0.527649
Suprasolidus	2.7	24.7	1.61437	0	0.423294	1.79396	0.265939	2.48319		2.46359	21.9042	0.344015	0	0.0902022	1.59091	0.242654	1.92376		2.93641	27.4958	2.88472	0	0.756386	1.99702	0.289225	3.04263				2.48319	0.559433
Suprasolidus	3.2	24.8	1.56824	0	0.4112	1.80122	0.315187	2.52761		2.94317	21.9964	0.291805	0	0.0765125	1.5976	0.28989	1.964		3.45683	27.6036	2.84468	0	0.745888	2.00485	0.340484	3.09122				2.52761	0.563608
Suprasolidus	4	19.1	1.93724	0	0.507953	1.38723	0.393984	2.28917		3.71983	16.756	0.819235	0	0.214807	1.21698	0.366388	1.79818		4.28017	21.444	3.05525	0	0.801099	1.55748	0.42158	2.78016				2.28917	0.49099
Suprasolidus	4.6	24.2	1.93724	0	0.507953	1.75765	0.453082	2.71868		4.29113	21.4432	0.660187	0	0.173104	1.55742	0.422659	2.15318		4.90887	26.9568	3.21429	0	0.842802	1.95788	0.483504	3.28418				2.71868	0.565502
Suprasolidus	3.7	31	1.19924	0	0.314447	2.25153	0.364435	2.93041		3.4143	27.7333	-0.254738	0	-0.0667934	2.01427	0.336295	2.28377		3.9857	34.2667	2.65323	0	0.695688	2.48879	0.392575	3.57705				2.93041	0.646639
Suprasolidus	3.6	30.4	1.98336	0	0.520047	2.20795	0.354586	3.08258		3.31854	27.1764	0.53456	0	0.140164	1.97382	0.326863	2.44085		3.88146	33.6236	3.43217	0	0.899931	2.44208	0.382308	3.72432				3.08258	0.641733
Suprasolidus	2.4	20.2	1.33762	0	0.35073	1.46713	0.23639	2.05425		2.18424	17.7649	0.21247	0	0.0557106	1.29026	0.215139	1.56111		2.61576	22.6351	2.46277	0	0.645748	1.64399	0.257642	2.54738				2.05425	0.493131
Suprasolidus	3.3	20.8	1.42987	0	0.374918	1.5107	0.325037	2.21066		3.04543	18.3156	0.276514	0	0.0725031	1.33026	0.299962	1.70273		3.55457	23.2844	2.58322	0	0.677332	1.69115	0.350111	2.71859				2.21066	0.507933
Suprasolidus	3.2	17.1	1.42987	0	0.374918	1.24197	0.315187	1.93208		2.95494	14.925	0.39263	0	0.102949	1.084	0.29105	1.478		3.44506	19.275	2.46711	0	0.646886	1.39994	0.339325	2.38615				1.93208	0.454074
Suprasolidus	2.8	16.2	1.84499	0	0.483765	1.17661	0.275789	1.93616		2.57302	14.1024	0.830568	0	0.217779	1.02425	0.253432	1.49547		3.02698	18.2976	2.85941	0	0.749751	1.32896	0.298146	2.37685				1.93616	0.440694
Suprasolidus	3.1	21.7	1.79887	0	0.471671	1.57607	0.305338	2.35308		2.85198	19.1424	0.612436	0	0.160583	1.39031	0.280909	1.8318		3.34802	24.2576	2.9853	0	0.782758	1.76183	0.329766	2.87436				2.35308	0.521277
Suprasolidus	3.5	20.7	1.52212	0	0.399106	1.50344	0.344736	2.24728		3.23746	18.2237	0.368222	0	0.0965496	1.32359	0.318877	1.73902		3.76254	23.1763	2.67601	0	0.701662	1.68329	0.370595	2.75555				2.24728	0.508267
Suprasolidus	4.9	24.7	1.33762	0	0.35073	1.79396	0.48263	2.62732		4.58046	21.9041	0.0540438	0	0.0141705	1.59089	0.451157	2.05622		5.21954	27.4959	2.62119	0	0.687289	1.99703	0.514103	3.19842				2.62732	0.571099
Suprasolidus	3	15.4	1.29149	0	0.338635	1.1185	0.295488	1.75263		2.76591	13.3718	0.312995	0	0.0820686	0.971195	0.272431	1.32569		3.23409	17.4282	2.26999	0	0.595202	1.26581	0.318545	2.17956				1.75263	0.426931
Suprasolidus	1.3	26.7	1.66049	0	0.435388	1.93922	0.128045	2.50265		1.11669	23.7505	0.339043	0	0.0888986	1.725	0.109989	1.92389		1.48331	29.6495	2.98194	0	0.781878	2.15344	0.1461	3.08142				2.50265	0.578764
Suprasolidus	3.5	19.2	2.76749	0	0.725647	1.3945	0.344736	2.46488		3.23887	16.8476	1.63276	0	0.428118	1.22364	0.319015	1.97077		3.76113	21.5524	3.90221	0	1.02318	1.56535	0.370457	2.95898				2.46488	0.494105
Suprasolidus	3.7	15.2	2.85974	0	0.749836	1.10398	0.364435	2.21825		3.43606	13.1891	1.8421	0	0.483007	0.957922	0.338438	1.77937		3.96394	17.2109	3.87737	0	1.01666	1.25003	0.390432	2.65713				2.21825	0.438879
Suprasolidus	3.1	20.6	2.72136	0	0.713553	1.49618	0.305338	2.51507		2.85312	18.1319	1.54896	0	0.406145	1.31692	0.281021	2.00408		3.34688	23.0681	3.89376	0	1.02096	1.67544	0.329654	3.02605				2.51507	0.510984
Suprasolidus	3.9	20.6	3.22873	0	0.846589	1.49618	0.384134	2.7269		3.62097	18.1318	2.03784	0	0.534331	1.31691	0.356651	2.20789		4.17903	23.0682	4.41963	0	1.15885	1.67544	0.411617	3.24591				2.7269	0.519007
Suprasolidus	4.1	28.1	3.41323	0	0.894965	2.0409	0.403834	3.3397		3.80283	25.045	1.99948	0	0.524273	1.81902	0.374564	2.71786		4.39717	31.155	4.82698	0	1.26566	2.26279	0.433103	3.96155				3.3397	0.621845
Suprasolidus	3.4	24.1	2.81361	0	0.737741	1.75038	0.334886	2.82301		3.1356	21.351	1.53241	0	0.401804	1.55073	0.308844	2.26137		3.6644	26.849	4.09482	0	1.07368	1.95004	0.360929	3.38465				2.82301	0.561637
Suprasolidus	3.1	19.7	2.85974	0	0.749836	1.43081	0.305338	2.48598		2.85441	17.3061	1.71141	0	0.448738	1.25694	0.281148	1.98683		3.34559	22.0939	4.00807	0	1.05093	1.60468	0.329528	2.98514				2.48598	0.499159
Suprasolidus	4.1	27.7	3.36711	0	0.882871	2.01185	0.403834	3.29856		3.80343	24.6749	1.96553	0	0.51537	1.79214	0.374623	2.68213		4.39657	30.7251	4.76869	0	1.25037	2.23156	0.433044	3.91498				3.29856	0.616425
Suprasolidus	4.7	23.4	2.72136	0	0.713553	1.69954	0.462931	2.87603		4.3883	20.7061	1.45169	0	0.380639	1.50389	0.43223	2.31676		5.0117	26.0939	3.99103	0	1.04647	1.8952	0.493633	3.4353				2.87603	0.559271
Suprasolidus	2.4	21.6	2.76749	0	0.725647	1.56881	0.23639	2.53085		2.18077	19.0505	1.56969	0	0.41158	1.38363	0.214797	2.01001		2.61923	24.1495	3.96528	0	1.03971	1.75398	0.257983	3.05168				2.53085	0.520834
Suprasolidus	3.3	22.4	2.95198	0	0.774024	1.62691	0.325037	2.72597		3.0421	19.7859	1.71896	0	0.450719	1.43705	0.299635	2.1874		3.5579	25.0141	4.18501	0	1.09733	1.81677	0.350439	3.26454				2.72597	0.538568
Suprasolidus	4.1	22	2.53686	0	0.665177	1.59786	0.403834	2.66687		3.81186	19.418	1.31762	0	0.345487	1.41033	0.375453	2.13127		4.38814	24.582	3.7561	0	0.984867	1.78539	0.432214	3.20247				2.66687	0.5356
Suprasolidus	4.3	23	2.53686	0	0.665177	1.67049	0.423533	2.7592		4.00313	20.3379	1.28617	0	0.337239	1.47714	0.394293	2.20868		4.59687	25.6621	3.78755	0	0.993114	1.86384	0.452773	3.30972				2.7592	0.550524
Suprasolidus	2.7	18.9	3.32098	0	0.870777	1.37271	0.265939	2.50942		2.47218	16.5727	2.18942	0	0.574075	1.20367	0.2435	2.02125		2.92782	21.2273	4.45255	0	1.16748	1.54174	0.288378	2.9976				2.50942	0.488173
Suprasolidus	2.7	17.9	2.44461	0	0.640988	1.30008	0.265939	2.207		2.47433	15.6569	1.36435	0	0.35774	1.13716	0.243712	1.73861		2.92567	20.1431	3.52487	0	0.924237	1.46299	0.288166	2.67539				2.207	0.46839
Suprasolidus	2.2	17.9	2.90586	0	0.76193	1.30008	0.216691	2.2787		1.9958	15.6569	1.81894	0	0.476935	1.13716	0.196579	1.81068		2.4042	20.1431	3.99278	0	1.04692	1.46299	0.236804	2.74672				2.2787	0.46802
Suprasolidus	3.2	23.5	1.33762	0	0.35073	1.70681	0.315187	2.37272		2.94538	20.7984	0.104395	0	0.0273729	1.51059	0.290108	1.82807		3.45462	26.2016	2.57084	0	0.674086	1.90302	0.340266	2.91737				2.37272	0.544652
Suprasolidus	2.7	16.1	1.42987	0	0.374918	1.16934	0.265939	1.8102		2.47781	14.011	0.429069	0	0.112504	1.01762	0.244054	1.37418		2.92219	18.189	2.43067	0	0.637332	1.32106	0.287824	2.24622				1.8102	0.436019
Suprasolidus	2.6	27.9	1.70662	0	0.447483	2.02638	0.25609	2.72995		2.36192	24.8601	0.341008	0	0.0894138	1.80559	0.23264	2.12764		2.83808	30.9399	3.07222	0	0.805551	2.24716	0.279539	3.33225				2.72995	0.602305
Suprasolidus	1.8	17	1.42987	0	0.374918	1.23471	0.177293	1.78692		1.61638	14.8337	0.408552	0	0.107124	1.07737	0.159207	1.3437		1.98362	19.1663	2.45118	0	0.642711	1.39205	0.195378	2.23014				1.78692	0.443218
Suprasolidus	2.6	22.1	1.42987	0	0.374918	1.60512	0.25609	2.23613		2.37237	19.5102	0.242528	0	0.063592	1.41702	0.233669	1.71428		2.82763	24.6898	2.61721	0	0.686244	1.79322	0.27851	2.75798				2.23613	0.521847
Suprasolidus	2.8	22.9	1.61437	0	0.423294	1.66323	0.275789	2.36231		2.56253	20.2461	0.397502	0	0.104227	1.47047	0.252399	1.8271		3.03747	25.5539	2.83123	0	0.742362	1.85598	0.299179	2.89752				2.36231	0.535213
Suprasolidus	2.7	25	1.42987	0	0.374918	1.81575	0.265939	2.45661		2.46319	22.1809	0.153834	0	0.040336	1.611	0.242614	1.89395		2.93681	27.8191	2.7059	0	0.7095	2.0205	0.289264	3.01926				2.45661	0.562656
Suprasolidus	2.9	19.6	1.75274	0	0.459577	1.42355	0.285638	2.16876		2.66361	17.2144	0.633489	0	0.166104	1.25029	0.262355	1.67874		3.13639	21.9856	2.87199	0	0.75305	1.59681	0.308922	2.65878				2.16876	0.490019
Suprasolidus	3	22.7	1.70662	0	0.447483	1.6487	0.295488	2.39167		2.75455	20.062	0.492426	0	0.129116	1.4571	0.271312	1.85753		3.24545	25.338	2.92081	0	0.765849	1.8403	0.319664	2.92581				2.39167	0.53414
Suprasolidus	3.1	27.1	0.96862	0	0.253977	1.96827	0.305338	2.52759		2.84377	24.1202	-0.365089	0	-0.095728	1.75185	0.2801	1.93622		3.35623	30.0798	2.30233	0	0.603681	2.1847	0.330576	3.11895				2.52759	0.591366
Suprasolidus	2.6	25.3	1.24537	0	0.326541	1.83754	0.25609	2.42017		2.36689	22.4577	-0.0356788	0	-0.00935514	1.6311	0.23313	1.85488		2.83311	28.1423	2.52642	0	0.662438	2.04397	0.27905	2.98546				2.42017	0.565292
Suprasolidus	3.1	22.5	1.47599	0	0.387012	1.63417	0.305338	2.32652		2.85093	19.878	0.27142	0	0.0711676	1.44374	0.280805	1.79571		3.34907	25.122	2.68056	0	0.702856	1.82461	0.32987	2.85734				2.32652	0.530813
Suprasolidus	2.2	22.1	1.38374	0	0.362824	1.60512	0.216691	2.18464		1.98937	19.5102	0.200414	0	0.0525494	1.41702	0.195945	1.66552		2.41063	24.6898	2.56707	0	0.673098	1.79322	0.237438	2.70376				2.18464	0.519119
Suprasolidus	2.6	24	1.06087	0	0.278165	1.74312	0.25609	2.27737		2.36932	21.2591	-0.177783	0	-0.0466155	1.54404	0.233368	1.7308		2.83068	26.7409	2.29952	0	0.602945	1.9422	0.278811	2.82395				2.27737	0.546577
Suprasolidus	2.4	22.5	0.784121	0	0.2056	1.63417	0.23639	2.07617		2.18057	19.8781	-0.402174	0	-0.105452	1.44375	0.214777	1.55307		2.61943	25.1219	1.97042	0	0.516652	1.8246	0.258003	2.59926				2.07617	0.523094
Suprasolidus	1.2	14.3	1.06087	0	0.278165	1.03861	0.118195	1.43497		1.04931	12.3685	0.139464	0	0.036568	0.898324	0.103353	1.03824		1.35069	16.2315	1.98228	0	0.519762	1.17889	0.133038	1.83169				1.43497	0.396725
Suprasolidus	2.7	26.7	1.93724	0	0.507953	1.93922	0.265939	2.71311		2.45988	23.7504	0.601874	0	0.157814	1.72499	0.242288	2.1251		2.94012	29.6496	3.27261	0	0.858092	2.15345	0.28959	3.30113				2.71311	0.588016
Suprasolidus	1.9	19.1	1.29149	0	0.338635	1.38723	0.187142	1.91301		1.70808	16.7562	0.205786	0	0.0539579	1.217	0.168239	1.4392		2.09192	21.4438	2.3772	0	0.623313	1.55747	0.206046	2.38682				1.91301	0.473813
Suprasolidus	3	23.6	1.84499	0	0.483765	1.71407	0.295488	2.49332		2.75301	20.8905	0.600994	0	0.157583	1.51728	0.27116	1.94602		3.24699	26.3095	3.08899	0	0.809947	1.91086	0.319816	3.04062				2.49332	0.547301
Suprasolidus	1.7	16.8	1.38374	0	0.362824	1.22018	0.167443	1.75045		1.5213	14.6508	0.370615	0	0.097177	1.06409	0.149842	1.31111		1.8787	18.9492	2.39687	0	0.62847	1.37628	0.185045	2.18979				1.75045	0.439341
Suprasolidus	1.9	15.4	1.06087	0	0.278165	1.1185	0.187142	1.58381		1.7151	13.3719	0.0981358	0	0.0257316	0.971203	0.16893	1.16586		2.0849	17.4281	2.0236	0	0.530598	1.2658	0.205355	2.00175				1.58381	0.417944
Suprasolidus	2.4	19.5	1.38374	0	0.362824	1.41629	0.23639	2.0155		2.18542	17.1228	0.279536	0	0.0732956	1.24363	0.215255	1.53218		2.61458	21.8772	2.48795	0	0.652352	1.58894	0.257526	2.49882				2.0155	0.483318
Suprasolidus	1.9	22.1	1.93724	0	0.507953	1.60512	0.187142	2.30022		1.70174	19.5102	0.745333	0	0.19543	1.41702	0.167614	1.78007		2.09826	24.6898	3.12915	0	0.820477	1.79322	0.206671	2.82037				2.30022	0.520151
Suprasolidus	2	19.8	1.52212	0	0.399106	1.43807	0.196992	2.03417		1.80219	17.398	0.408951	0	0.107229	1.26361	0.177508	1.54835		2.19781	22.202	2.63528	0	0.690983	1.61253	0.216476	2.51999				2.03417	0.485821
Suprasolidus	2.8	22.2	0.876371	0	0.229788	1.61239	0.275789	2.11796		2.56419	19.6021	-0.305518	0	-0.0801082	1.4237	0.252562	1.59616		3.03581	24.7979	2.05826	0	0.539685	1.80107	0.299015	2.63977				2.11796	0.521807
Suprasolidus	3.4	29.5	1.84499	0	0.483765	2.14259	0.334886	2.96124		3.12763	26.3418	0.425345	0	0.111527	1.91321	0.308059	2.33279		3.67237	32.6582	3.26464	0	0.856002	2.37196	0.361714	3.58968				2.96124	0.628443
Suprasolidus	3.1	21.9	1.75274	0	0.459577	1.5906	0.305338	2.35551		2.8517	19.3262	0.561128	0	0.14713	1.40366	0.280881	1.83167		3.3483	24.4738	2.94435	0	0.772023	1.77753	0.329794	2.87935				2.35551	0.523837
Suprasolidus	2.7	17.7	1.66049	0	0.435388	1.28555	0.265939	1.98688		2.47519	15.4739	0.604184	0	0.15842	1.12387	0.243796	1.52609		2.92481	19.9261	2.7168	0	0.712357	1.44723	0.288083	2.44767				1.98688	0.460791
Suprasolidus	3.1	22.9	1.47599	0	0.387012	1.66323	0.305338	2.35558		2.85029	20.246	0.259256	0	0.067978	1.47047	0.280742	1.81919		3.34971	25.554	2.69273	0	0.706046	1.85598	0.329933	2.89196				2.35558	0.536386
Suprasolidus	2.5	17.2	1.52212	0	0.399106	1.24924	0.24624	1.89458		2.28479	15.0165	0.486393	0	0.127534	1.09065	0.225043	1.44323		2.71521	19.3835	2.55784	0	0.670678	1.40782	0.267437	2.34594				1.89458	0.451354
Suprasolidus	2.5	18.1	1.75274	0	0.459577	1.3146	0.24624	2.02042		2.28316	15.8401	0.683699	0	0.179269	1.15047	0.224882	1.55462		2.71684	20.3599	2.82178	0	0.739884	1.47874	0.267598	2.48622				2.02042	0.465803
Suprasolidus	3.1	18.3	2.21399	0	0.580518	1.32913	0.305338	2.21498		2.85689	16.0231	1.12304	0	0.294465	1.16376	0.281392	1.73962		3.34311	20.5769	3.30494	0	0.866571	1.4945	0.329283	2.69035				2.21498	0.475368
Suprasolidus	3.8	26.5	1.70662	0	0.447483	1.9247	0.374285	2.74646		3.51716	23.5656	0.372711	0	0.0977266	1.71157	0.346426	2.15572		4.08284	29.4344	3.04052	0	0.797238	2.13782	0.402144	3.3372				2.74646	0.590742
Suprasolidus	3.6	24.8	2.30624	0	0.604706	1.80122	0.354586	2.76052		3.32701	21.9964	1.01285	0	0.265574	1.5976	0.327697	2.19087		3.87299	27.6036	3.59963	0	0.943838	2.00485	0.381474	3.33016				2.76052	0.569649
Suprasolidus	3	19.6	2.21399	0	0.580518	1.42355	0.295488	2.29955		2.75912	17.2144	1.08401	0	0.284232	1.25028	0.271762	1.80628		3.24088	21.9856	3.34397	0	0.876804	1.59681	0.319214	2.79283				2.29955	0.493278
Suprasolidus	2.9	19.1	2.12174	0	0.55633	1.38723	0.285638	2.2292		2.66415	16.756	1.01003	0	0.264833	1.21699	0.262408	1.74423		3.13585	21.444	3.23345	0	0.847826	1.55747	0.308869	2.71417				2.2292	0.484969
Suprasolidus	3.1	23.2	2.02949	0	0.532141	1.68502	0.305338	2.52249		2.84947	20.5221	0.793143	0	0.207966	1.49052	0.280661	1.97915		3.35053	25.8779	3.26584	0	0.856317	1.87951	0.330014	3.06584				2.52249	0.543344
Suprasolidus	3.4	22.1	2.26011	0	0.592612	1.60512	0.334886	2.53262		3.13895	19.51	1.04971	0	0.27524	1.41701	0.309174	2.00143		3.66105	24.69	3.47051	0	0.909984	1.79323	0.360599	3.06381				2.53262	0.531193
Suprasolidus	3	21.7	2.21399	0	0.580518	1.57607	0.295488	2.45208		2.75583	19.1423	1.02002	0	0.267454	1.39031	0.271438	1.9292		3.24417	24.2577	3.40796	0	0.893582	1.76183	0.319538	2.97495				2.45208	0.522876
Suprasolidus	3.2	21.8	2.26011	0	0.592612	1.58333	0.315187	2.49113		2.94746	19.2342	1.06047	0	0.278061	1.39698	0.290313	1.96536		3.45254	24.3658	3.45975	0	0.907163	1.76968	0.340061	3.01691				2.49113	0.525776
Suprasolidus	3.3	19.1	2.58299	0	0.677271	1.38723	0.325037	2.38954		3.04723	16.756	1.45735	0	0.382124	1.21699	0.30014	1.89925		3.55277	21.444	3.70862	0	0.972418	1.55748	0.349934	2.87983				2.38954	0.490291
Suprasolidus	3.2	21.1	2.21399	0	0.580518	1.53249	0.315187	2.4282		2.94856	18.591	1.0365	0	0.271774	1.35027	0.290422	1.91246		3.45144	23.609	3.39148	0	0.889262	1.71472	0.339953	2.94393				2.4282	0.515735
Suprasolidus	3.5	24.8	1.98336	0	0.520047	1.80122	0.344736	2.66601		3.23108	21.9964	0.696904	0	0.182731	1.5976	0.318248	2.09858		3.76892	27.6036	3.26983	0	0.857363	2.00485	0.371224	3.23344				2.66601	0.56743
Suprasolidus	3.5	24.2	1.98336	0	0.520047	1.75765	0.344736	2.62243		3.23199	21.4432	0.71471	0	0.1874	1.55742	0.318338	2.06316		3.76801	26.9568	3.25202	0	0.852694	1.95787	0.371134	3.1817				2.62243	0.559269

## Sheet: Mt Stafford
					Units - micro watts m-3					heat production lower bound									heat production upper bound											heat production	1 sigma error
Sample	K2O (wt%)	Th (ppm)	U (ppm)	∆Time (Ma)	heat from U at nominated time	heat from Th at time	heat from K at time	total heat production at time (micro watts m-3)		K2O (wt%)	Th (ppm)	U (ppm)	∆Time (Ma)	heat from U at nominated time	heat from Th at time	heat from K at time	total heat production at time (micro watts m-3)		K2O (wt%)	Th (ppm)	U (ppm)	∆Time (Ma)	heat from U at nominated time	heat from Th at time	heat from K at time	total heat production at time (micro watts m-3)
Subsolidus	3	20.5	1.70662	0	0.447483	1.48891	0.295488	2.23189		2.75805	18.0402	0.559655	0	0.146744	1.31026	0.271657	1.72866		3.24195	22.9598	2.85358	0	0.748221	1.66757	0.319319	2.73511				2.23189	0.503228
Subsolidus	4.2	19.5	2.16786	0	0.568424	1.41629	0.413683	2.39839		3.91161	17.1226	1.0308	0	0.270281	1.24362	0.385278	1.89917		4.48839	21.8774	3.30492	0	0.866566	1.58895	0.442088	2.89761				2.39839	0.499218
Subsolidus	3.9	22.6	2.62911	0	0.689365	1.64144	0.384134	2.71494		3.61852	19.9699	1.39184	0	0.364948	1.45041	0.35641	2.17177		4.18148	25.2301	3.86638	0	1.01378	1.83246	0.411859	3.25811				2.71494	0.543168
Subsolidus	4	20.3	0.96862	0	0.253977	1.47439	0.393984	2.12235		3.71878	17.8566	-0.166938	0	-0.0437718	1.29692	0.366285	1.61944		4.28122	22.7434	2.10418	0	0.551725	1.65186	0.421683	2.62526				2.12235	0.502914
Subsolidus	4.2	20.3	1.06087	0	0.278165	1.47439	0.413683	2.16624		3.91118	17.8565	-0.0783164	0	-0.0205349	1.29692	0.385235	1.66162		4.48882	22.7435	2.20006	0	0.576865	1.65186	0.442131	2.67085				2.16624	0.504616
Subsolidus	4.2	19.2	1.19924	0	0.314447	1.3945	0.413683	2.12263		3.91252	16.8476	0.0913983	0	0.023965	1.22364	0.385367	1.63298		4.48748	21.5524	2.30709	0	0.604929	1.56535	0.441999	2.61228				2.12263	0.48965
Subsolidus	3.7	20	1.15312	0	0.302353	1.4526	0.364435	2.11939		3.43073	17.5813	0.0261788	0	0.0068642	1.27693	0.337913	1.62171		3.96927	22.4187	2.28006	0	0.597842	1.62827	0.390957	2.61707				2.11939	0.497681
Subsolidus	4.3	19.4	1.19924	0	0.314447	1.40902	0.423533	2.147		4.00853	17.031	0.0842372	0	0.0220874	1.23696	0.394825	1.65387		4.59147	21.769	2.31425	0	0.606807	1.58108	0.452241	2.64013				2.147	0.49313
Subsolidus	4	20.4	1.56824	0	0.4112	1.48165	0.393984	2.28684		3.71832	17.9483	0.418022	0	0.109607	1.30358	0.366239	1.77943		4.28168	22.8517	2.71846	0	0.712793	1.65972	0.421729	2.79424				2.28684	0.507405
Subsolidus	2.4	19	1.61437	0	0.423294	1.37997	0.23639	2.03965		2.18611	16.6645	0.521029	0	0.136616	1.21034	0.215323	1.56228		2.61389	21.3355	2.7077	0	0.709972	1.5496	0.257458	2.51703				2.03965	0.477376
Subsolidus	2.4	20.5	1.38374	0	0.362824	1.48891	0.23639	2.08813		2.18368	18.0402	0.248343	0	0.0651166	1.31026	0.215084	1.59046		2.61632	22.9598	2.51914	0	0.660531	1.66757	0.257697	2.5858				2.08813	0.497666
Subsolidus	2.5	22.3	2.12174	0	0.55633	1.61965	0.24624	2.42222		2.27576	19.694	0.915547	0	0.240061	1.43038	0.224153	1.89459		2.72424	24.906	3.32793	0	0.872599	1.80892	0.268327	2.94985				2.42222	0.527627
Subsolidus	2.2	20.5	1.15312	0	0.302353	1.48891	0.216691	2.00796		1.99249	18.0403	0.0238305	0	0.00624847	1.31026	0.196252	1.51276		2.40751	22.9597	2.28241	0	0.598458	1.66757	0.237131	2.50315				2.00796	0.495195
Subsolidus	2.4	20.4	1.56824	0	0.4112	1.48165	0.23639	2.12924		2.18373	17.9484	0.432269	0	0.113343	1.30359	0.215088	1.63203		2.61627	22.8516	2.70421	0	0.709057	1.65971	0.257693	2.62646				2.12924	0.497217
Subsolidus	2.8	17.5	1.89112	0	0.495859	1.27102	0.275789	2.04267		2.57103	15.2909	0.835013	0	0.218944	1.11058	0.253236	1.58276		3.02897	19.7091	2.94722	0	0.772774	1.43147	0.298342	2.50259				2.04267	0.459914
Subsolidus	4.9	21	2.02949	0	0.532141	1.52523	0.48263	2.54		4.58475	18.4991	0.843463	0	0.22116	1.34359	0.45158	2.01633		5.21525	23.5009	3.21552	0	0.843123	1.70687	0.513681	3.06368				2.54	0.523676
Subsolidus	4.2	21.5	1.79887	0	0.471671	1.56155	0.413683	2.4469		3.9092	18.9585	0.608744	0	0.159615	1.37695	0.38504	1.92161		4.4908	24.0415	2.98899	0	0.783726	1.74614	0.442326	2.97219				2.4469	0.525289
Subsolidus	4.3	22.6	1.89112	0	0.495859	1.64144	0.423533	2.56083		4.004	19.9699	0.665161	0	0.174408	1.45041	0.394378	2.0192		4.596	25.2301	3.11707	0	0.81731	1.83246	0.452687	3.10246				2.56083	0.541632
Subsolidus	4.2	20.5	1.79887	0	0.471671	1.48891	0.413683	2.37427		3.91052	18.0401	0.639097	0	0.167574	1.31025	0.38517	1.86299		4.48948	22.9599	2.95863	0	0.775767	1.66758	0.442196	2.88554				2.37427	0.511276
Subsolidus	3.9	21.5	1.84499	0	0.483765	1.56155	0.384134	2.42944		3.62049	18.9585	0.656667	0	0.172181	1.37696	0.356603	1.90574		4.17951	24.0415	3.03331	0	0.795349	1.74613	0.411665	2.95315				2.42944	0.523704
Subsolidus	3.9	21.2	1.24537	0	0.326541	1.53976	0.384134	2.25043		3.62124	18.6829	0.0778091	0	0.0204019	1.35694	0.356677	1.73402		4.17876	23.7171	2.41293	0	0.632681	1.72257	0.411592	2.76685				2.25043	0.516413
Subsolidus	3.7	20.6	1.56824	0	0.4112	1.49618	0.364435	2.27181		3.42965	18.1319	0.414674	0	0.10873	1.31692	0.337807	1.76346		3.97035	23.0681	2.72181	0	0.713671	1.67544	0.391064	2.78017				2.27181	0.508356
Subsolidus	3.9	21.7	1.61437	0	0.423294	1.57607	0.384134	2.3835		3.62034	19.1423	0.424497	0	0.111305	1.39031	0.356589	1.8582		4.17966	24.2577	2.80424	0	0.735284	1.76184	0.41168	2.9088				2.3835	0.5253
Subsolidus	3.9	22.3	1.89112	0	0.495859	1.61965	0.384134	2.49964		3.61935	19.6939	0.677707	0	0.177698	1.43037	0.356491	1.96456		4.18065	24.9061	3.10452	0	0.81402	1.80893	0.411778	3.03472				2.49964	0.535082
Subsolidus	3.7	22.8	2.39849	0	0.628894	1.65596	0.364435	2.64929		3.42604	20.1539	1.16172	0	0.304609	1.46378	0.337451	2.10584		3.97396	25.4461	3.63525	0	0.95318	1.84815	0.391419	3.19275				2.64929	0.543454
Subsolidus	3.4	21.2	1.98336	0	0.520047	1.53976	0.334886	2.39469		3.14046	18.6829	0.805835	0	0.211294	1.35694	0.309322	1.87755		3.65954	23.7171	3.16089	0	0.828801	1.72257	0.36045	2.91182				2.39469	0.517135
Subsolidus	3.9	23.2	2.16786	0	0.568424	1.68502	0.384134	2.63757		3.61793	20.5221	0.922058	0	0.241768	1.49052	0.356351	2.08864		4.18207	25.8779	3.41367	0	0.89508	1.87951	0.411917	3.18651				2.63757	0.548936
Subsolidus	4	21.1	2.58299	0	0.677271	1.53249	0.393984	2.60375		3.71682	18.591	1.39057	0	0.364614	1.35026	0.366092	2.08097		4.28318	23.609	3.7754	0	0.989928	1.71473	0.421876	3.12653				2.60375	0.522781
Subsolidus	4.4	23.8	1.42987	0	0.374918	1.72859	0.433382	2.53689		4.09902	21.0746	0.175712	0	0.0460726	1.53065	0.403737	1.98046		4.70098	26.5254	2.68402	0	0.703763	1.92654	0.463028	3.09333				2.53689	0.556435
Subsolidus	4	21.8	1.47599	0	0.387012	1.58333	0.393984	2.36433		3.71647	19.2342	0.284835	0	0.074685	1.39698	0.366057	1.83772		4.28353	24.3658	2.66715	0	0.699339	1.76969	0.421911	2.89094				2.36433	0.526606
Subsolidus	3.7	22.3	1.61437	0	0.423294	1.61965	0.364435	2.40738		3.42721	19.694	0.408069	0	0.106998	1.43037	0.337566	1.87494		3.97279	24.906	2.82066	0	0.739591	1.80892	0.391304	2.93982				2.40738	0.532441
Subsolidus	3.9	20.7	2.39849	0	0.628894	1.50344	0.384134	2.51647		3.62128	18.2236	1.22295	0	0.320662	1.32358	0.356681	2.00093		4.17872	23.1764	3.57403	0	0.937126	1.6833	0.411587	3.03201				2.51647	0.515543
Subsolidus	4.6	19.9	2.53686	0	0.665177	1.44534	0.453082	2.5636		4.29631	17.4894	1.37594	0	0.360778	1.27026	0.423169	2.0542		4.90369	22.3106	3.69778	0	0.969576	1.62042	0.482994	3.07299				2.5636	0.509393
Subsolidus	2.8	23.7	1.93724	0	0.507953	1.72133	0.275789	2.50507		2.56097	20.9826	0.690079	0	0.180942	1.52397	0.252246	1.95715		3.03903	26.4174	3.1844	0	0.834964	1.9187	0.299332	3.05299				2.50507	0.547919
Subsolidus	3.6	23.6	2.67524	0	0.701459	1.71407	0.354586	2.77011		3.3286	20.8904	1.40994	0	0.369694	1.51727	0.327854	2.21482		3.8714	26.3096	3.94053	0	1.03322	1.91087	0.381318	3.32541				2.77011	0.555296
Subsolidus	2.5	19.3	1.89112	0	0.495859	1.40176	0.24624	2.14386		2.28107	16.9394	0.781715	0	0.204969	1.23031	0.224676	1.65995		2.71893	21.6606	3.00052	0	0.786749	1.57321	0.267804	2.62776				2.14386	0.483903
Subsolidus	4.5	19.2	2.16786	0	0.568424	1.3945	0.443232	2.40615		4.20094	16.8476	1.03705	0	0.27192	1.22364	0.413776	1.90933		4.79906	21.5524	3.29868	0	0.864928	1.56535	0.472688	2.90297				2.40615	0.496818
Subsolidus	4.9	22.1	1.52212	0	0.399106	1.60512	0.48263	2.48686		4.58365	19.51	0.31291	0	0.0820465	1.41701	0.451472	1.95053		5.21635	24.69	2.73132	0	0.716166	1.79324	0.513789	3.02319				2.48686	0.536333
Subsolidus	3.9	21.5	2.72136	0	0.713553	1.56155	0.384134	2.65923		3.62001	18.9584	1.51491	0	0.397215	1.37695	0.356556	2.13072		4.17999	24.0416	3.92782	0	1.02989	1.74614	0.411713	3.18774				2.65923	0.52851
Subsolidus	5.2	22.8	1.70662	0	0.447483	1.65596	0.512179	2.61563		4.87271	20.1538	0.470322	0	0.123321	1.46377	0.479942	2.06704		5.52729	25.4462	2.94291	0	0.771644	1.84816	0.544416	3.16422				2.61563	0.54859
Subsolidus	4.8	24.8	2.07561	0	0.544235	1.80122	0.472781	2.81824		4.48336	21.9963	0.776638	0	0.203638	1.59759	0.441593	2.24282		5.11664	27.6037	3.37459	0	0.884833	2.00486	0.503968	3.39366				2.81824	0.575419
Subsolidus	4.5	22.7	1.79887	0	0.471671	1.6487	0.443232	2.5636		4.1967	20.0619	0.569928	0	0.149438	1.45709	0.413358	2.01989		4.8033	25.3381	3.0278	0	0.793904	1.84031	0.473106	3.10732				2.5636	0.543715
Subsolidus	4.6	21.3	2.58299	0	0.677271	1.54702	0.453082	2.67737		4.29454	18.7746	1.37919	0	0.361629	1.3636	0.422996	2.14823		4.90546	23.8254	3.78679	0	0.992913	1.73044	0.483168	3.20652				2.67737	0.529146
Subsolidus	4.3	20.5	1.79887	0	0.471671	1.48891	0.423533	2.38412		4.00681	18.04	0.638166	0	0.16733	1.31025	0.394655	1.87223		4.59319	22.96	2.95957	0	0.776012	1.66758	0.452411	2.896				2.38412	0.511886
Subsolidus	4.4	21.6	1.84499	0	0.483765	1.56881	0.433382	2.48596		4.1017	19.0503	0.649124	0	0.170203	1.38363	0.404001	1.95783		4.6983	24.1497	3.04086	0	0.797327	1.75399	0.462763	3.01408				2.48596	0.528124
Subsolidus	4.3	20.5	1.98336	0	0.520047	1.48891	0.423533	2.4325		4.00671	18.04	0.818896	0	0.214718	1.31025	0.394645	1.91961		4.59329	22.96	3.14783	0	0.825376	1.66758	0.452421	2.94538				2.4325	0.512884
Subsolidus	4.3	21.7	2.12174	0	0.55633	1.57607	0.423533	2.55593		4.00507	19.1422	0.918229	0	0.240764	1.3903	0.394484	2.02555		4.59493	24.2578	3.32525	0	0.871895	1.76184	0.452582	3.08632				2.55593	0.530384
Subsolidus	4.4	20.9	2.30624	0	0.604706	1.51797	0.433382	2.55606		4.10237	18.4073	1.12206	0	0.29421	1.33692	0.404067	2.0352		4.69763	23.3927	3.49041	0	0.915203	1.69902	0.462698	3.07692				2.55606	0.52086
Subsolidus	4	22.8	1.84499	0	0.483765	1.65596	0.393984	2.53371		3.71488	20.1539	0.616561	0	0.161665	1.46378	0.365901	1.99135		4.28512	25.4461	3.07342	0	0.805865	1.84815	0.422067	3.07608				2.53371	0.542367
Subsolidus	4.7	24.2	2.07561	0	0.544235	1.75765	0.462931	2.76481		4.38758	21.4431	0.795113	0	0.208482	1.55741	0.432159	2.19806		5.01242	26.9569	3.35612	0	0.879989	1.95788	0.493704	3.33157				2.76481	0.566757
Subsolidus	4.5	22	2.02949	0	0.532141	1.59786	0.443232	2.57323		4.19749	19.418	0.817035	0	0.21423	1.41033	0.413436	2.038		4.80251	24.582	3.24194	0	0.850052	1.78539	0.473028	3.10847				2.57323	0.535237
Subsolidus	4.2	22	2.35236	0	0.6168	1.59786	0.413683	2.62834		3.90824	19.418	1.13606	0	0.297879	1.41033	0.384946	2.09316		4.49176	24.582	3.56867	0	0.935721	1.78539	0.442421	3.16353				2.62834	0.535188
Subsolidus	4.3	23	1.93724	0	0.507953	1.67049	0.423533	2.60198		4.00344	20.338	0.698424	0	0.18313	1.47715	0.394323	2.0546		4.59656	25.662	3.17606	0	0.832776	1.86383	0.452742	3.14935				2.60198	0.547377
Subsolidus	4.5	24.2	1.79887	0	0.471671	1.75765	0.443232	2.67255		4.19472	21.4432	0.52523	0	0.137718	1.55742	0.413163	2.1083		4.80528	26.9568	3.0725	0	0.805624	1.95787	0.473301	3.2368				2.67255	0.564251
Subsolidus	4.1	21.1	1.66049	0	0.435388	1.53249	0.403834	2.37171		3.81354	18.591	0.486149	0	0.12747	1.35026	0.375619	1.85335		4.38646	23.609	2.83483	0	0.743306	1.71472	0.432049	2.89008				2.37171	0.518361
Subsolidus	4.6	22.9	1.66049	0	0.435388	1.66323	0.453082	2.5517		4.29296	20.2459	0.427304	0	0.112041	1.47046	0.42284	2.00534		4.90704	25.5541	2.89368	0	0.758736	1.85599	0.483323	3.09805				2.5517	0.546356
Subsolidus	4.9	21.9	2.07561	0	0.544235	1.5906	0.48263	2.61746		4.58363	19.326	0.861673	0	0.225935	1.40365	0.451469	2.08105		5.21637	24.474	3.28956	0	0.862536	1.77754	0.513792	3.15387				2.61746	0.536409
Subsolidus	4.6	22.1	2.02949	0	0.532141	1.60512	0.453082	2.59035		4.29381	19.51	0.813148	0	0.213211	1.41701	0.422923	2.05314		4.90619	24.69	3.24583	0	0.851072	1.79324	0.48324	3.12755				2.59035	0.537204
Subsolidus	4.2	23.1	1.52212	0	0.399106	1.67775	0.413683	2.49054		3.90719	20.43	0.289009	0	0.0757796	1.48383	0.384843	1.94446		4.49281	25.77	2.75522	0	0.722432	1.87167	0.442524	3.03663				2.49054	0.546086
Subsolidus	4.3	20.9	2.49074	0	0.653083	1.51797	0.423533	2.59458		4.00593	18.4072	1.30357	0	0.341802	1.33692	0.394568	2.07329		4.59407	23.3928	3.6779	0	0.964363	1.69902	0.452498	3.11588				2.59458	0.521294
Subsolidus	4	22.3	2.02949	0	0.532141	1.61965	0.393984	2.54577		3.71548	19.6939	0.812475	0	0.213035	1.43037	0.36596	2.00936		4.28452	24.9061	3.2465	0	0.851248	1.80893	0.422008	3.08218				2.54577	0.53641
Subsolidus	4.7	23	2.16786	0	0.568424	1.67049	0.462931	2.70184		4.38908	20.3379	0.921081	0	0.241512	1.47714	0.432307	2.15096		5.01092	25.6621	3.41465	0	0.895336	1.86384	0.493555	3.25273				2.70184	0.550884
Subsolidus	4.6	21.5	2.21399	0	0.580518	1.56155	0.453082	2.59514		4.29448	18.9584	1.0119	0	0.265326	1.37695	0.422989	2.06526		4.90552	24.0416	3.41607	0	0.89571	1.74614	0.483174	3.12502				2.59514	0.529881
Subsolidus	2.8	23.1	2.07561	0	0.544235	1.67775	0.275789	2.49778		2.56189	20.4301	0.843804	0	0.221249	1.48384	0.252336	1.95742		3.03811	25.7699	3.30742	0	0.867222	1.87167	0.299241	3.03813				2.49778	0.540353
Subsolidus	3.5	22.9	1.66049	0	0.435388	1.66323	0.344736	2.44335		3.23414	20.246	0.436905	0	0.114558	1.47047	0.31855	1.90358		3.76586	25.554	2.88408	0	0.756218	1.85599	0.370922	2.98313				2.44335	0.539776
Subsolidus	3.9	20	1.47599	0	0.387012	1.4526	0.384134	2.22375		3.62274	17.5813	0.340829	0	0.0893669	1.27693	0.356826	1.72312		4.17726	22.4187	2.61116	0	0.684657	1.62827	0.411443	2.72437				2.22375	0.500627
Subsolidus	3.7	20.4	1.61437	0	0.423294	1.48165	0.364435	2.26938		3.4299	17.9483	0.466014	0	0.122191	1.30359	0.337832	1.76361		3.9701	22.8517	2.76272	0	0.724398	1.65972	0.391039	2.77515				2.26938	0.505772
Subsolidus	4.9	22.3	1.61437	0	0.423294	1.61965	0.48263	2.52557		4.58336	19.6939	0.397403	0	0.104201	1.43037	0.451443	1.98601		5.21664	24.9061	2.83133	0	0.742388	1.80893	0.513818	3.06514				2.52557	0.539564
Subsolidus	2.3	22.2	1.66049	0	0.435388	1.61239	0.226541	2.27432		2.08472	19.6021	0.468027	0	0.122719	1.4237	0.205337	1.75176		2.51528	24.7979	2.85296	0	0.748058	1.80107	0.247745	2.79687				2.27432	0.522558
Subsolidus	2.4	20.2	1.93724	0	0.507953	1.46713	0.23639	2.21147		2.18381	17.7649	0.799864	0	0.209728	1.29026	0.215096	1.71509		2.61619	22.6351	3.07462	0	0.806178	1.64399	0.257685	2.70785				2.21147	0.496383
Subsolidus	3.3	22.4	1.61437	0	0.423294	1.62691	0.325037	2.37524		3.04289	19.786	0.408513	0	0.107114	1.43706	0.299713	1.84388		3.55711	25.014	2.82022	0	0.739475	1.81677	0.350361	2.9066				2.37524	0.53136
Subsolidus	4.1	24.7	2.12174	0	0.55633	1.79396	0.403834	2.75412		3.80835	21.9041	0.830677	0	0.217807	1.5909	0.375107	2.18381		4.39165	27.4959	3.4128	0	0.894852	1.99703	0.43256	3.32444				2.75412	0.570314
Subsolidus	4.6	21.7	2.26011	0	0.592612	1.57607	0.453082	2.62176		4.2942	19.1422	1.0511	0	0.275603	1.3903	0.422961	2.08886		4.9058	24.2578	3.46913	0	0.909621	1.76184	0.483202	3.15467				2.62176	0.532901
Subsolidus	4.3	24.7	1.79887	0	0.471671	1.79396	0.423533	2.68916		4.00121	21.9041	0.512124	0	0.134281	1.5909	0.394103	2.11928		4.59879	27.4959	3.08561	0	0.80906	1.99703	0.452963	3.25905				2.68916	0.569885
Subsolidus	4.3	24.1	1.79887	0	0.471671	1.75038	0.423533	2.64559		4.00203	21.351	0.529898	0	0.138942	1.55072	0.394184	2.08385		4.59797	26.849	3.06783	0	0.8044	1.95004	0.452882	3.20732				2.64559	0.561736
Subsolidus	4.2	23.8	1.84499	0	0.483765	1.72859	0.413683	2.62604		3.90606	21.0746	0.584936	0	0.153373	1.53065	0.384732	2.06875		4.49394	26.5254	3.10504	0	0.814157	1.92654	0.442635	3.18333				2.62604	0.557288
Subsolidus	4.2	22.7	1.93724	0	0.507953	1.6487	0.413683	2.57034		3.90751	20.0619	0.708274	0	0.185713	1.45709	0.384875	2.02768		4.49249	25.3381	3.16621	0	0.830194	1.84031	0.442492	3.11299				2.57034	0.542655
Subsolidus	4	24.4	2.26011	0	0.592612	1.77217	0.393984	2.75877		3.71241	21.6275	0.976091	0	0.255935	1.57081	0.365658	2.1924		4.28759	27.1725	3.54414	0	0.929289	1.97354	0.42231	3.32514				2.75877	0.566368
Subsolidus	4	23	1.70662	0	0.447483	1.67049	0.393984	2.51196		3.71468	20.338	0.474817	0	0.124499	1.47715	0.365881	1.96753		4.28532	25.662	2.93842	0	0.770466	1.86383	0.422087	3.05638				2.51196	0.544428
Subsolidus	4.3	24.7	2.07561	0	0.544235	1.79396	0.423533	2.76173		4.00106	21.9041	0.783749	0	0.205503	1.59089	0.394089	2.19049		4.59894	27.4959	3.36748	0	0.882968	1.99703	0.452977	3.33297				2.76173	0.571243
Subsolidus	4.7	24.8	1.61437	0	0.423294	1.80122	0.462931	2.68745		4.38702	21.9963	0.324643	0	0.0851228	1.59759	0.432104	2.11482		5.01298	27.6037	2.90409	0	0.761466	2.00486	0.493758	3.26008				2.68745	0.572631
Subsolidus	2.12	15.74	0.945558	0	0.24793	1.1432	0.208812	1.59994		1.9246	13.6823	-0.0275522	0	-0.00722431	0.993748	0.189565	1.17609		2.3154	17.7977	1.91867	0	0.503083	1.29264	0.228058	2.02379				1.59994	0.423848
Subsolidus	1.2	14.32	0.645747	0	0.169318	1.04006	0.118195	1.32757		1.0497	12.3868	-0.266831	0	-0.0699643	0.89965	0.103391	0.933077		1.3503	16.2532	1.55832	0	0.4086	1.18047	0.132999	1.72207				1.32757	0.394497
Subsolidus	2.92	23.02	0.710321	0	0.186249	1.67194	0.287608	2.1458		2.67796	20.3565	-0.494926	0	-0.129772	1.4785	0.263769	1.61249		3.16204	25.6835	1.91557	0	0.502271	1.86539	0.311448	2.67911				2.1458	0.533308
Subsolidus	4.69	23.32	1.54979	0	0.406363	1.69373	0.461946	2.56204		4.37933	20.6325	0.305302	0	0.0800516	1.49854	0.431346	2.00994		5.00067	26.0075	2.79428	0	0.732673	1.88892	0.492546	3.11414				2.56204	0.552102
Subsolidus	1.6	19.39	1.00552	0	0.263652	1.4083	0.157594	1.82954		1.42091	17.022	-0.0813845	0	-0.0213394	1.23631	0.139954	1.35493		1.77909	21.758	2.09242	0	0.548643	1.58028	0.175233	2.30416				1.82954	0.474616
Subsolidus	3.38	21.54	1.57747	0	0.413619	1.56445	0.332916	2.31099		3.121	18.9953	0.397827	0	0.104312	1.37963	0.307406	1.79135		3.639	24.0847	2.75711	0	0.722926	1.74927	0.358427	2.83062				2.31099	0.519638
Subsolidus	5	26.47	1.72968	0	0.45353	1.92252	0.49248	2.86853		4.67465	23.5378	0.386582	0	0.101364	1.70955	0.460435	2.27135		5.32535	29.4022	3.07277	0	0.805695	2.13548	0.524525	3.4657				2.86853	0.597179
Subsolidus	4.92	24.98	1.67433	0	0.439017	1.8143	0.4846	2.73791		4.59927	22.1623	0.376395	0	0.0986925	1.60965	0.453009	2.16135		5.24073	27.7977	2.97226	0	0.779341	2.01895	0.516191	3.31448				2.73791	0.576564
Subsolidus	3.41	22.7	1.42064	0	0.372499	1.6487	0.335871	2.35707		3.14815	20.062	0.208378	0	0.0546377	1.4571	0.31008	1.82182		3.67185	25.338	2.63291	0	0.69036	1.8403	0.361663	2.89232				2.35707	0.535252
Subsolidus	2.12	15.74	0.945558	0	0.24793	1.1432	0.208812	1.59994		1.9246	13.6823	-0.0275522	0	-0.00722431	0.993748	0.189565	1.17609		2.3154	17.7977	1.91867	0	0.503083	1.29264	0.228058	2.02379				1.59994	0.423848
Subsolidus	1.2	14.32	0.645747	0	0.169318	1.04006	0.118195	1.32757		1.0497	12.3868	-0.266831	0	-0.0699643	0.89965	0.103391	0.933077		1.3503	16.2532	1.55832	0	0.4086	1.18047	0.132999	1.72207				1.32757	0.394497
Subsolidus	2.92	23.02	0.710321	0	0.186249	1.67194	0.287608	2.1458		2.67796	20.3565	-0.494926	0	-0.129772	1.4785	0.263769	1.61249		3.16204	25.6835	1.91557	0	0.502271	1.86539	0.311448	2.67911				2.1458	0.533308
Subsolidus	4.69	23.32	1.54979	0	0.406363	1.69373	0.461946	2.56204		4.37933	20.6325	0.305302	0	0.0800516	1.49854	0.431346	2.00994		5.00067	26.0075	2.79428	0	0.732673	1.88892	0.492546	3.11414				2.56204	0.552102
Subsolidus	1.6	19.39	1.00552	0	0.263652	1.4083	0.157594	1.82954		1.42091	17.022	-0.0813845	0	-0.0213394	1.23631	0.139954	1.35493		1.77909	21.758	2.09242	0	0.548643	1.58028	0.175233	2.30416				1.82954	0.474616
Subsolidus	3.38	21.54	1.57747	0	0.413619	1.56445	0.332916	2.31099		3.121	18.9953	0.397827	0	0.104312	1.37963	0.307406	1.79135		3.639	24.0847	2.75711	0	0.722926	1.74927	0.358427	2.83062				2.31099	0.519638
Subsolidus	5	26.47	1.72968	0	0.45353	1.92252	0.49248	2.86853		4.67465	23.5378	0.386582	0	0.101364	1.70955	0.460435	2.27135		5.32535	29.4022	3.07277	0	0.805695	2.13548	0.524525	3.4657				2.86853	0.597179
Subsolidus	4.92	24.98	1.67433	0	0.439017	1.8143	0.4846	2.73791		4.59927	22.1623	0.376395	0	0.0986925	1.60965	0.453009	2.16135		5.24073	27.7977	2.97226	0	0.779341	2.01895	0.516191	3.31448				2.73791	0.576564
Subsolidus	3.41	22.7	1.42064	0	0.372499	1.6487	0.335871	2.35707		3.14815	20.062	0.208378	0	0.0546377	1.4571	0.31008	1.82182		3.67185	25.338	2.63291	0	0.69036	1.8403	0.361663	2.89232				2.35707	0.535252
Subsolidus	3.59	20.93	1.23153	0	0.322913	1.52015	0.353601	2.19666		3.32372	18.4349	0.0753692	0	0.0197622	1.33893	0.327373	1.68606		3.85628	23.4251	2.38769	0	0.626064	1.70136	0.379828	2.70725				2.19666	0.510595
Subsolidus	4.99	25.18	1.94647	0	0.510372	1.82882	0.491495	2.83069		4.66654	22.3468	0.637174	0	0.16707	1.62305	0.459636	2.24975		5.31346	28.0132	3.25576	0	0.853674	2.0346	0.523354	3.41163				2.83069	0.580938
Subsolidus	5.63	25.74	1.80809	0	0.47409	1.8695	0.554532	2.89812		5.28557	22.8636	0.479812	0	0.125809	1.66058	0.520608	2.307		5.97443	28.6164	3.13637	0	0.82237	2.07841	0.588457	3.48924				2.89812	0.591122
Subsolidus	4.13	25.68	1.21308	0	0.318075	1.86514	0.406788	2.59		3.83634	22.8083	-0.0909455	0	-0.0238463	1.65657	0.377864	2.01059		4.42366	28.5517	2.51711	0	0.659997	2.07371	0.435713	3.16942				2.59	0.579417
Subsolidus	5.6	27.02	2.2924	0	0.601078	1.96246	0.551578	3.11512		5.2547	24.046	0.918813	0	0.240917	1.74646	0.517567	2.50494		5.9453	29.994	3.66599	0	0.961239	2.17846	0.585588	3.72529				3.11512	0.610174
Subsolidus	5.17	27.19	1.95569	0	0.512791	1.97481	0.509224	2.99682		4.83807	24.2032	0.586531	0	0.153791	1.75788	0.476531	2.3882		5.50193	30.1768	3.32485	0	0.87179	2.19174	0.541918	3.60545				2.99682	0.608624
Subsolidus	5.43	23.1	1.72507	0	0.45232	1.67775	0.534833	2.66491		5.09496	20.4299	0.477527	0	0.12521	1.48383	0.501834	2.11087		5.76504	25.7701	2.9726	0	0.779431	1.87168	0.567833	3.21894				2.66491	0.554038
Subsolidus	5.21	28.44	2.23244	0	0.585356	2.0656	0.513164	3.16412		4.87505	25.3597	0.82251	0	0.215666	1.84188	0.480173	2.53772		5.54495	31.5203	3.64237	0	0.955045	2.28932	0.546155	3.79052				3.16412	0.626401
Subsolidus	4.02	25.8	1.91879	0	0.503115	1.87385	0.395954	2.77292		3.72985	22.9191	0.599824	0	0.157277	1.66461	0.367375	2.18926		4.31015	28.6809	3.23776	0	0.848954	2.0831	0.424533	3.35658				2.77292	0.583661
Subsolidus	2.42	22.66	1.34223	0	0.351939	1.6458	0.23836	2.2361		2.19904	20.0253	0.140796	0	0.0369173	1.45443	0.216597	1.70795		2.64096	25.2947	2.54367	0	0.666961	1.83716	0.260124	2.76424				2.2361	0.528147
Subsolidus	3.9	24.61	1.63743	0	0.429341	1.78742	0.384134	2.6009		3.6162	21.8212	0.359644	0	0.0943003	1.58487	0.356181	2.03535		4.1838	27.3988	2.91521	0	0.764382	1.98998	0.412087	3.16645				2.6009	0.565547
Subsolidus	4.99	25.76	2.08945	0	0.547864	1.87095	0.491495	2.91031		4.66573	22.882	0.760643	0	0.199444	1.66192	0.459556	2.32092		5.31427	28.638	3.41826	0	0.896283	2.07997	0.523434	3.49969				2.91031	0.589385
Subsolidus	5.61	28.15	2.72597	0	0.714763	2.04453	0.552563	3.31186		5.26281	25.0912	1.31239	0	0.344115	1.82238	0.518366	2.68486		5.95719	31.2088	4.13956	0	1.08541	2.26669	0.586759	3.93886				3.31186	0.627004
Subsolidus	4.4	24.42	1.54979	0	0.406363	1.77362	0.433382	2.61337		4.09812	21.646	0.275008	0	0.0721083	1.57215	0.403648	2.0479		4.70188	27.194	2.82458	0	0.740617	1.9751	0.463117	3.17884				2.61337	0.565466
Subsolidus	5.02	26.44	2.11713	0	0.55512	1.92034	0.49445	2.96991		4.69385	23.51	0.76788	0	0.201342	1.70753	0.462325	2.3712		5.34615	29.37	3.46637	0	0.908899	2.13314	0.526575	3.56861				2.96991	0.598707
Subsolidus	4.51	25.57	1.65127	0	0.43297	1.85715	0.444217	2.73434		4.2026	22.7067	0.339795	0	0.0890959	1.64919	0.413939	2.15222		4.8174	28.4333	2.96274	0	0.776843	2.06511	0.474494	3.31645				2.73434	0.582111
Subsolidus	4.96	27.03	2.15403	0	0.564796	1.96319	0.48854	3.01652		4.63504	24.0553	0.787603	0	0.206513	1.74714	0.456533	2.41018		5.28496	30.0047	3.52045	0	0.923078	2.17924	0.520547	3.62287				3.01652	0.606343
Subsolidus	5.66	27.09	2.61066	0	0.684527	1.96755	0.557487	3.20956		5.31267	24.1107	1.2288	0	0.322197	1.75116	0.523276	2.59663		6.00733	30.0693	3.99252	0	1.04686	2.18393	0.591698	3.82249				3.20956	0.612929
Subsolidus	4.05	24.78	1.67433	0	0.439017	1.79977	0.398909	2.6377		3.76032	21.9779	0.389577	0	0.102149	1.59626	0.370377	2.06878		4.33968	27.5821	2.95908	0	0.775885	2.00329	0.427441	3.20661				2.6377	0.568915
Subsolidus	4.86	26.04	2.14019	0	0.561167	1.89129	0.478691	2.93114		4.53968	23.1406	0.803378	0	0.210649	1.6807	0.447141	2.33849		5.18032	28.9394	3.477	0	0.911685	2.10187	0.510241	3.5238				2.93114	0.592652
Subsolidus	5.38	26.94	2.59682	0	0.680899	1.95665	0.529908	3.16746		5.04144	23.972	1.22162	0	0.320315	1.74109	0.496561	2.55797		5.71856	29.908	3.97203	0	1.04148	2.17222	0.563256	3.77695				3.16746	0.609494
Subsolidus	4.8	26.01	2.05255	0	0.538188	1.88911	0.472781	2.90008		4.48179	23.1129	0.71869	0	0.188444	1.67869	0.441439	2.30857		5.11821	28.9071	3.38641	0	0.887933	2.09952	0.504123	3.49158				2.90008	0.591504
Subsolidus	5.67	27.49	1.96491	0	0.51521	1.9966	0.558472	3.07028		5.32216	24.4806	0.583166	0	0.152909	1.77803	0.524211	2.45515		6.01784	30.4994	3.34666	0	0.87751	2.21517	0.592733	3.68542				3.07028	0.615135
Subsolidus	3.82	23.22	1.54979	0	0.406363	1.68647	0.376255	2.46909		3.54129	20.5405	0.315871	0	0.0828228	1.49186	0.348803	1.92348		4.09871	25.8995	2.78371	0	0.729902	1.88108	0.403706	3.01469				2.46909	0.545601
Subsolidus	2.02	22.16	1.25921	0	0.33017	1.60948	0.198962	2.13861		1.81703	19.5654	0.0777119	0	0.0203764	1.42103	0.17897	1.62038		2.22297	24.7546	2.4407	0	0.639963	1.79793	0.218954	2.65684				2.13861	0.518232
Subsolidus	4.06	25.44	1.76658	0	0.463205	1.84771	0.399894	2.71081		3.76896	22.5868	0.460593	0	0.120769	1.64048	0.371228	2.13247		4.35104	28.2932	3.07256	0	0.80564	2.05494	0.42856	3.28914				2.71081	0.578331
Subsolidus	3.2	23.25	1.42526	0	0.373708	1.68865	0.315187	2.37754		2.94572	20.5682	0.198006	0	0.0519181	1.49387	0.290141	1.83593		3.45428	25.9318	2.6525	0	0.695499	1.88343	0.340233	2.91916				2.37754	0.541615
Subsolidus	3.04	24.26	1.36529	0	0.357986	1.762	0.299428	2.41942		2.79061	21.4986	0.109949	0	0.028829	1.56144	0.274864	1.86514		3.28939	27.0214	2.62064	0	0.687143	1.96256	0.323992	2.9737				2.41942	0.554282
Subsolidus	4.45	25.63	1.82654	0	0.478927	1.86151	0.438307	2.77874		4.14455	22.7621	0.51069	0	0.133905	1.65321	0.408222	2.19534		4.75545	28.4979	3.14239	0	0.823949	2.0698	0.468393	3.36214				2.77874	0.583403
Subsolidus	3.25	22.28	1.52212	0	0.399106	1.6182	0.320112	2.33741		2.99515	19.6756	0.322097	0	0.0844553	1.42904	0.29501	1.80851		3.50485	24.8844	2.72214	0	0.713757	1.80735	0.345214	2.86632				2.33741	0.528908
Subsolidus	4.17	23.73	2.24166	0	0.587774	1.72351	0.410728	2.72201		3.87705	21.0101	0.976357	0	0.256005	1.52596	0.381874	2.16384		4.46295	26.4499	3.50697	0	0.919543	1.92105	0.439582	3.28018				2.72201	0.558168
Subsolidus	3.17	25.22	1.43448	0	0.376127	1.83173	0.312232	2.52009		2.91377	22.3839	0.148132	0	0.0388409	1.62574	0.286995	1.95158		3.42623	28.0561	2.72083	0	0.713414	2.03772	0.33747	3.0886				2.52009	0.568513
Subsolidus	2.58	22.09	1.26382	0	0.331379	1.6044	0.25412	2.1899		2.35334	19.501	0.0800699	0	0.0209947	1.41636	0.231795	1.66914		2.80666	24.679	2.44757	0	0.641763	1.79244	0.276444	2.71065				2.1899	0.52075
Subsolidus	2.43	19.8	1.42064	0	0.372499	1.43807	0.239345	2.04992		2.21358	17.3979	0.306063	0	0.0802511	1.26361	0.218029	1.56189		2.64642	22.2021	2.53522	0	0.664747	1.61254	0.260662	2.53795				2.04992	0.488027
Subsolidus	3.35	21.09	1.24076	0	0.325332	1.53177	0.329962	2.18706		3.09308	18.5819	0.0816592	0	0.0214114	1.3496	0.304656	1.67567		3.60692	23.5981	2.39985	0	0.629252	1.71393	0.355267	2.69845				2.18706	0.511389
Subsolidus	3.9	21.44	1.33301	0	0.34952	1.55719	0.384134	2.29084		3.62086	18.9034	0.156442	0	0.0410198	1.37295	0.35664	1.77061		4.17914	23.9766	2.50957	0	0.65802	1.74142	0.411629	2.81107				2.29084	0.520229
Subsolidus	2.68	24.06	1.02858	0	0.269699	1.74748	0.263969	2.28115		2.44592	21.3143	-0.211955	0	-0.0555756	1.54806	0.240913	1.7334		2.91408	26.8057	2.26912	0	0.594973	1.9469	0.287026	2.82889				2.28115	0.547749
Subsolidus	4.52	22.86	1.44371	0	0.378546	1.66032	0.445202	2.48407		4.21596	20.2091	0.216447	0	0.0567534	1.46779	0.415255	1.9398		4.82404	25.5109	2.67096	0	0.700339	1.85286	0.475149	3.02834				2.48407	0.544273
Subsolidus	4.2	22.22	1.27304	0	0.333798	1.61384	0.413683	2.36132		3.90852	19.6204	0.0711153	0	0.0186468	1.42503	0.384973	1.82865		4.49148	24.8196	2.47497	0	0.648949	1.80265	0.442393	2.89399				2.36132	0.532671
Subsolidus	2.87	22.67	1.21769	0	0.319285	1.64652	0.282684	2.24849		2.63027	20.0344	0.014635	0	0.00383736	1.4551	0.259071	1.71801		3.10973	25.3056	2.42075	0	0.634732	1.83794	0.306296	2.77897				2.24849	0.530481
Subsolidus	2.49	22.97	1.30533	0	0.342264	1.66831	0.245255	2.25583		2.26556	20.3105	0.0945496	0	0.0247913	1.47515	0.223149	1.72309		2.71444	25.6295	2.51611	0	0.659736	1.86147	0.267361	2.78857				2.25583	0.532736
Subsolidus	2.95	23.84	1.39297	0	0.365242	1.7315	0.290563	2.3873		2.70494	21.1116	0.150514	0	0.0394656	1.53333	0.266426	1.83923		3.19506	26.5684	2.63542	0	0.691019	1.92966	0.314701	2.93538				2.3873	0.548079
Subsolidus	3.12	22.33	1.86805	0	0.489812	1.62183	0.307308	2.41895		2.87013	19.7216	0.660945	0	0.173303	1.43238	0.282697	1.88838		3.36987	24.9384	3.07516	0	0.806321	1.81128	0.331918	2.94952				2.41895	0.530568
Subsolidus	2.66	23.17	0.880983	0	0.230998	1.68284	0.261999	2.17583		2.42839	20.4946	-0.329689	0	-0.086446	1.48852	0.239186	1.64127		2.89161	25.8454	2.09166	0	0.548441	1.87715	0.284812	2.7104				2.17583	0.534569
Subsolidus	2.57	24.57	1.59592	0	0.418457	1.78452	0.253135	2.45611		2.33919	21.7844	0.330783	0	0.0867328	1.5822	0.230401	1.89933		2.80081	27.3556	2.86105	0	0.75018	1.98684	0.275869	3.01289				2.45611	0.556777
Subsolidus	4.18	26.16	2.04794	0	0.536979	1.9	0.411713	2.84869		3.88339	23.2515	0.714826	0	0.187431	1.68875	0.382499	2.25868		4.47661	29.0685	3.38105	0	0.886528	2.11125	0.440928	3.4387				2.84869	0.59001
Subsolidus	4.18	23.42	1.72968	0	0.45353	1.70099	0.411713	2.56624		3.88738	20.7246	0.483293	0	0.126722	1.50523	0.382892	2.01484		4.47262	26.1154	2.97606	0	0.780338	1.89676	0.440535	3.11763				2.56624	0.551394
Subsolidus	2.4	23.09	1.07932	0	0.283002	1.67703	0.23639	2.19642		2.1793	20.421	-0.130352	0	-0.0341789	1.48318	0.214652	1.66365		2.6207	25.759	2.28899	0	0.600184	1.87088	0.258129	2.72919				2.19642	0.53277
Subsolidus	2.17	22.93	1.19924	0	0.314447	1.66541	0.213736	2.19359		1.95923	20.2737	-0.00594358	0	-0.00155843	1.47248	0.192976	1.6639		2.38077	25.5863	2.40443	0	0.630453	1.85833	0.234497	2.72328				2.19359	0.52969
Subsolidus	3.93	23.49	1.66972	0	0.437807	1.70608	0.387089	2.53098		3.64665	20.7891	0.424512	0	0.111309	1.50991	0.359181	1.9804		4.21335	26.1909	2.91492	0	0.764306	1.90224	0.414998	3.08155				2.53098	0.550571
Subsolidus	3.22	21.67	1.6282	0	0.426923	1.57389	0.317157	2.31797		2.96724	19.1148	0.445007	0	0.116683	1.38831	0.292261	1.79725		3.47276	24.2252	2.8114	0	0.737162	1.75948	0.342053	2.83869				2.31797	0.52072
Subsolidus	2.33	22.36	1.42526	0	0.373708	1.62401	0.229496	2.22721		2.11333	19.7493	0.232159	0	0.060873	1.43439	0.208155	1.70342		2.54667	24.9707	2.61835	0	0.686544	1.81362	0.250837	2.751				2.22721	0.523793
Subsolidus	1.81	24.18	1.60514	0	0.420875	1.75619	0.178278	2.35535		1.6116	21.4249	0.356993	0	0.0936052	1.55609	0.158736	1.80843		2.0084	26.9351	2.85329	0	0.748146	1.95629	0.197819	2.90226				2.35535	0.546912
Subsolidus	3.59	20.93	1.23153	0	0.322913	1.52015	0.353601	2.19666		3.32372	18.4349	0.0753692	0	0.0197622	1.33893	0.327373	1.68606		3.85628	23.4251	2.38769	0	0.626064	1.70136	0.379828	2.70725				2.19666	0.510595
Subsolidus	5.63	25.74	1.80809	0	0.47409	1.8695	0.554532	2.89812		5.28557	22.8636	0.479812	0	0.125809	1.66058	0.520608	2.307		5.97443	28.6164	3.13637	0	0.82237	2.07841	0.588457	3.48924				2.89812	0.591122
Subsolidus	4.99	25.18	1.94647	0	0.510372	1.82882	0.491495	2.83069		4.66654	22.3468	0.637174	0	0.16707	1.62305	0.459636	2.24975		5.31346	28.0132	3.25576	0	0.853674	2.0346	0.523354	3.41163				2.83069	0.580938
Subsolidus	4.13	25.68	1.21308	0	0.318075	1.86514	0.406788	2.59		3.83634	22.8083	-0.0909455	0	-0.0238463	1.65657	0.377864	2.01059		4.42366	28.5517	2.51711	0	0.659997	2.07371	0.435713	3.16942				2.59	0.579417
Subsolidus	5.6	27.02	2.2924	0	0.601078	1.96246	0.551578	3.11512		5.2547	24.046	0.918813	0	0.240917	1.74646	0.517567	2.50494		5.9453	29.994	3.66599	0	0.961239	2.17846	0.585588	3.72529				3.11512	0.610174
Subsolidus	5.17	27.19	1.95569	0	0.512791	1.97481	0.509224	2.99682		4.83807	24.2032	0.586531	0	0.153791	1.75788	0.476531	2.3882		5.50193	30.1768	3.32485	0	0.87179	2.19174	0.541918	3.60545				2.99682	0.608624
Subsolidus	5.43	23.1	1.72507	0	0.45232	1.67775	0.534833	2.66491		5.09496	20.4299	0.477527	0	0.12521	1.48383	0.501834	2.11087		5.76504	25.7701	2.9726	0	0.779431	1.87168	0.567833	3.21894				2.66491	0.554038
Subsolidus	5.21	28.44	2.23244	0	0.585356	2.0656	0.513164	3.16412		4.87505	25.3597	0.82251	0	0.215666	1.84188	0.480173	2.53772		5.54495	31.5203	3.64237	0	0.955045	2.28932	0.546155	3.79052				3.16412	0.626401
Subsolidus	4.02	25.8	1.91879	0	0.503115	1.87385	0.395954	2.77292		3.72985	22.9191	0.599824	0	0.157277	1.66461	0.367375	2.18926		4.31015	28.6809	3.23776	0	0.848954	2.0831	0.424533	3.35658				2.77292	0.583661
Subsolidus	2.42	22.66	1.34223	0	0.351939	1.6458	0.23836	2.2361		2.19904	20.0253	0.140796	0	0.0369173	1.45443	0.216597	1.70795		2.64096	25.2947	2.54367	0	0.666961	1.83716	0.260124	2.76424				2.2361	0.528147
Subsolidus	3.9	24.61	1.63743	0	0.429341	1.78742	0.384134	2.6009		3.6162	21.8212	0.359644	0	0.0943003	1.58487	0.356181	2.03535		4.1838	27.3988	2.91521	0	0.764382	1.98998	0.412087	3.16645				2.6009	0.565547
Subsolidus	4.99	25.76	2.08945	0	0.547864	1.87095	0.491495	2.91031		4.66573	22.882	0.760643	0	0.199444	1.66192	0.459556	2.32092		5.31427	28.638	3.41826	0	0.896283	2.07997	0.523434	3.49969				2.91031	0.589385
Subsolidus	5.61	28.15	2.72597	0	0.714763	2.04453	0.552563	3.31186		5.26281	25.0912	1.31239	0	0.344115	1.82238	0.518366	2.68486		5.95719	31.2088	4.13956	0	1.08541	2.26669	0.586759	3.93886				3.31186	0.627004
Subsolidus	4.4	24.42	1.54979	0	0.406363	1.77362	0.433382	2.61337		4.09812	21.646	0.275008	0	0.0721083	1.57215	0.403648	2.0479		4.70188	27.194	2.82458	0	0.740617	1.9751	0.463117	3.17884				2.61337	0.565466
Subsolidus	3.1	19.2	2.21399	0	0.580518	1.3945	0.305338	2.28035		2.85555	16.8477	1.09537	0	0.287212	1.22365	0.281261	1.79212		3.34445	21.5523	3.33261	0	0.873824	1.56535	0.329414	2.76858				2.28035	0.488233
Subsolidus	2.9	23	1.98336	0	0.520047	1.67049	0.285638	2.47618		2.65799	20.3381	0.755571	0	0.198114	1.47715	0.261802	1.93707		3.14201	25.6619	3.21116	0	0.84198	1.86383	0.309475	3.01528				2.47618	0.539106
Subsolidus	4.9	20.4	2.53686	0	0.665177	1.48165	0.48263	2.62946		4.58523	17.9482	1.35819	0	0.356124	1.30357	0.451626	2.11133		5.21477	22.8518	3.71553	0	0.974229	1.65973	0.513634	3.14759				2.62946	0.518134
Subsolidus	4.6	24.3	2.44461	0	0.640988	1.76491	0.453082	2.85898		4.29074	21.5353	1.15492	0	0.302824	1.56411	0.422621	2.28955		4.90926	27.0647	3.73431	0	0.979153	1.96571	0.483542	3.4284				2.85898	0.569426
Subsolidus	2.8	20.8	2.07561	0	0.544235	1.5107	0.275789	2.33073		2.56569	18.3156	0.913586	0	0.239546	1.33026	0.25271	1.82252		3.03431	23.2844	3.23764	0	0.848925	1.69115	0.298867	2.83894				2.33073	0.508211
Subsolidus	3	19.8	2.21399	0	0.580518	1.43807	0.295488	2.31408		2.75881	17.3978	1.07788	0	0.282625	1.2636	0.271732	1.81796		3.24119	22.2022	3.3501	0	0.87841	1.61254	0.319244	2.8102				2.31408	0.496118
Subsolidus	5.02	26.44	2.11713	0	0.55512	1.92034	0.49445	2.96991		4.69385	23.51	0.76788	0	0.201342	1.70753	0.462325	2.3712		5.34615	29.37	3.46637	0	0.908899	2.13314	0.526575	3.56861				2.96991	0.598707
Subsolidus	3	20.8	1.93724	0	0.507953	1.5107	0.295488	2.31415		2.75743	18.3156	0.776363	0	0.203566	1.33026	0.271596	1.80542		3.24257	23.2844	3.09812	0	0.81234	1.69115	0.31938	2.82287				2.31415	0.508724
Subsolidus	3.2	21.3	1.84499	0	0.483765	1.54702	0.315187	2.34597		2.94848	18.7748	0.668972	0	0.175408	1.36361	0.290414	1.82943		3.45152	23.8252	3.02101	0	0.792122	1.73043	0.33996	2.86251				2.34597	0.516537
Subsolidus	2.7	21.2	1.66049	0	0.435388	1.53976	0.265939	2.24108		2.46952	18.683	0.495493	0	0.129921	1.35694	0.243238	1.7301		2.93048	23.717	2.82549	0	0.740856	1.72257	0.288641	2.75206				2.24108	0.510981
Subsolidus	2.8	20.2	1.75274	0	0.459577	1.46713	0.275789	2.20249		2.56688	17.7648	0.615827	0	0.161473	1.29026	0.252827	1.70456		3.03312	22.6352	2.88965	0	0.757681	1.64399	0.298751	2.70042				2.20249	0.497931
Subsolidus	4.8	26.3	2.90586	0	0.76193	1.91017	0.472781	3.14488		4.481	23.3807	1.54761	0	0.40579	1.69814	0.441361	2.54529		5.119	29.2193	4.26411	0	1.11807	2.1222	0.504201	3.74447				3.14488	0.59959
Subsolidus	4.9	25.4	2.58299	0	0.677271	1.8448	0.48263	3.0047		4.57896	22.5498	1.25609	0	0.329352	1.63779	0.451009	2.41815		5.22104	28.2502	3.90989	0	1.02519	2.05182	0.514251	3.59126				3.0047	0.586554
Subsolidus	3.8	23.3	2.30624	0	0.604706	1.69228	0.374285	2.67127		3.52152	20.6141	1.05558	0	0.276777	1.49721	0.346856	2.12084		4.07848	25.9859	3.5569	0	0.932635	1.88735	0.401714	3.2217				2.67127	0.550432
Subsolidus	4.6	25.9	2.81361	0	0.737741	1.88112	0.453082	3.07194		4.28844	23.0113	1.47024	0	0.385503	1.67131	0.422394	2.47921		4.91156	28.7887	4.15698	0	1.08998	2.09092	0.483769	3.66467				3.07194	0.592733
Subsolidus	3.7	25.3	2.85974	0	0.749836	1.83754	0.364435	2.95181		3.42212	22.4576	1.54008	0	0.403817	1.63109	0.337065	2.37197		3.97788	28.1424	4.17939	0	1.09585	2.04399	0.391806	3.53165				2.95181	0.579836
Subsolidus	3.3	25.5	2.21399	0	0.580518	1.85207	0.325037	2.75762		3.0377	22.6422	0.904177	0	0.237079	1.6445	0.299201	2.18078		3.5623	28.3578	3.5238	0	0.923956	2.05963	0.350872	3.33446				2.75762	0.576838
Subsolidus	4.1	25.7	2.67524	0	0.701459	1.86659	0.403834	2.97188		3.80664	22.8267	1.34437	0	0.3525	1.6579	0.374939	2.38534		4.39336	28.5733	4.0061	0	1.05042	2.07528	0.432728	3.55843				2.97188	0.586542
Subsolidus	3.3	23.1	2.12174	0	0.55633	1.67775	0.325037	2.55912		3.04151	20.4301	0.884927	0	0.232032	1.48384	0.299577	2.01544		3.55849	25.7699	3.35855	0	0.880627	1.87167	0.350497	3.10279				2.55912	0.543675
Subsolidus	4.6	24.2	2.81361	0	0.737741	1.75765	0.453082	2.94847		4.2907	21.4431	1.5195	0	0.398421	1.55741	0.422616	2.37845		4.9093	26.9569	4.10772	0	1.07706	1.95788	0.483547	3.51849				2.94847	0.570019
Subsolidus	3.6	26.4	2.26011	0	0.592612	1.91743	0.354586	2.86463		3.32461	23.4732	0.920777	0	0.241432	1.70486	0.32746	2.27375		3.87539	29.3268	3.59945	0	0.943792	2.13001	0.381711	3.45551				2.86463	0.59088
Subsolidus	5.6	25.2	3.18261	0	0.834494	1.83028	0.551578	3.21635		5.25653	22.3651	1.84404	0	0.483515	1.62438	0.517747	2.62564		5.94347	28.0349	4.52118	0	1.18547	2.03617	0.585408	3.80705				3.21635	0.590707
Subsolidus	5.3	25	2.30624	0	0.604706	1.81575	0.522029	2.94248		4.96651	22.1807	0.992985	0	0.260365	1.61098	0.489181	2.36053		5.63349	27.8193	3.61949	0	0.949047	2.02052	0.554876	3.52444				2.94248	0.581955
Subsolidus	3.1	24.6	2.44461	0	0.640988	1.7867	0.305338	2.73302		2.84697	21.812	1.15846	0	0.303753	1.5842	0.280415	2.16837		3.35303	27.388	3.73076	0	0.978223	1.98919	0.33026	3.29768				2.73302	0.564653
Subsolidus	4.2	21.6	1.79887	0	0.471671	1.56881	0.413683	2.45416		3.90906	19.0504	0.605718	0	0.158822	1.38363	0.385027	1.92748		4.49094	24.1496	2.99201	0	0.784519	1.75399	0.442339	2.98085				2.45416	0.526684
Subsolidus	4.5	23.7	2.62911	0	0.689365	1.72133	0.443232	2.85393		4.19497	20.9824	1.3542	0	0.355078	1.52395	0.413187	2.29222		4.80503	26.4176	3.90402	0	1.02365	1.91871	0.473277	3.41564				2.85393	0.561708
Subsolidus	2.7	22.2	2.30624	0	0.604706	1.61239	0.265939	2.48303		2.46741	19.602	1.09772	0	0.287828	1.4237	0.24303	1.95456		2.93259	24.798	3.51475	0	0.921584	1.80108	0.288848	3.01151				2.48303	0.528476
Subsolidus	2.7	20.4	1.56824	0	0.4112	1.48165	0.265939	2.15879		2.47091	17.9484	0.429759	0	0.112685	1.30359	0.243374	1.65965		2.92909	22.8516	2.70672	0	0.709715	1.65971	0.288504	2.65793				2.15879	0.499139
Subsolidus	3.8	23.7	1.61437	0	0.423294	1.72133	0.374285	2.51891		3.52133	20.9825	0.365007	0	0.0957066	1.52396	0.346837	1.96651		4.07867	26.4175	2.86373	0	0.750882	1.9187	0.401733	3.07131				2.51891	0.552404
Subsolidus	2.9	23.5	1.79887	0	0.471671	1.70681	0.285638	2.46411		2.65729	20.7984	0.559559	0	0.146719	1.51059	0.261732	1.91904		3.14271	26.2016	3.03817	0	0.796623	1.90302	0.309545	3.00919				2.46411	0.545075
Subsolidus	4.5	23.5	2.76749	0	0.725647	1.70681	0.443232	2.87568		4.19516	20.7982	1.49564	0	0.392163	1.51058	0.413207	2.31595		4.80484	26.2018	4.03933	0	1.05913	1.90303	0.473257	3.43542				2.87568	0.559739
Subsolidus	3.6	19.5	2.16786	0	0.568424	1.41629	0.354586	2.33929		3.33479	17.1227	1.03646	0	0.271764	1.24362	0.328464	1.84385		3.86521	21.8773	3.29927	0	0.865083	1.58895	0.380708	2.83474				2.33929	0.495447
Subsolidus	4.4	23.7	2.44461	0	0.640988	1.72133	0.433382	2.7957		4.09863	20.9825	1.17424	0	0.307891	1.52396	0.403698	2.23555		4.70137	26.4175	3.71498	0	0.974086	1.91871	0.463066	3.35586				2.7957	0.560156
Subsolidus	3.5	21.1	2.21399	0	0.580518	1.53249	0.344736	2.45775		3.23647	18.591	1.03385	0	0.271081	1.35027	0.318779	1.94013		3.76353	23.609	3.39412	0	0.889955	1.71472	0.370693	2.97537				2.45775	0.517621
Subsolidus	3.4	22.4	1.98336	0	0.520047	1.62691	0.334886	2.48185		3.13866	19.786	0.769486	0	0.201763	1.43705	0.309146	1.94796		3.66134	25.014	3.19724	0	0.838332	1.81677	0.360627	3.01573				2.48185	0.533883
Subsolidus	3.5	22.7	2.12174	0	0.55633	1.6487	0.344736	2.54977		3.23417	20.0619	0.895233	0	0.234734	1.4571	0.318553	2.01038		3.76583	25.3381	3.34824	0	0.877925	1.8403	0.370919	3.08915				2.54977	0.539382
Subsolidus	4	23.3	1.75274	0	0.459577	1.69228	0.393984	2.54584		3.71424	20.6142	0.511072	0	0.134005	1.49721	0.365837	1.99705		4.28576	25.9858	2.99441	0	0.785148	1.88735	0.422131	3.09463				2.54584	0.54879
Subsolidus	3.8	24.7	2.53686	0	0.665177	1.79396	0.374285	2.83342		3.51936	21.9041	1.2403	0	0.325212	1.5909	0.346643	2.26275		4.08064	27.4959	3.83343	0	1.00514	1.99703	0.401926	3.40409				2.83342	0.570672
Subsolidus	4.4	24.3	2.62911	0	0.689365	1.76491	0.433382	2.88766		4.09773	21.5353	1.33746	0	0.350687	1.56411	0.40361	2.31841		4.70227	27.0647	3.92077	0	1.02804	1.96571	0.463155	3.45691				2.88766	0.569251
Subsolidus	3.8	21.7	2.39849	0	0.628894	1.57607	0.374285	2.57925		3.52374	19.1423	1.19376	0	0.313009	1.3903	0.347075	2.05039		4.07626	24.2577	3.60322	0	0.944779	1.76184	0.401495	3.10811				2.57925	0.528863
Subsolidus	3.7	22.5	1.98336	0	0.520047	1.63417	0.364435	2.51866		3.42671	19.8779	0.763878	0	0.200292	1.44373	0.337517	1.98154		3.97329	25.1221	3.20285	0	0.839802	1.82462	0.391353	3.05577				2.51866	0.537115
Subsolidus	4.4	20.7	2.39849	0	0.628894	1.50344	0.433382	2.56572		4.10258	18.2236	1.21837	0	0.319463	1.32358	0.404087	2.04713		4.69742	23.1764	3.5786	0	0.938326	1.6833	0.462677	3.0843				2.56572	0.518587
Subsolidus	2.4	21.7	1.93724	0	0.507953	1.57607	0.23639	2.32041		2.18117	19.1424	0.753813	0	0.197653	1.39031	0.214837	1.8028		2.61883	24.2576	3.12067	0	0.818253	1.76183	0.257944	2.83803				2.32041	0.517611
Subsolidus	3.7	22.4	2.26011	0	0.592612	1.62691	0.364435	2.58396		3.4267	19.7859	1.03811	0	0.272197	1.43705	0.337516	2.04676		3.9733	25.0141	3.48212	0	0.913027	1.81677	0.391354	3.12115				2.58396	0.537195
Subsolidus	4.6	24.5	2.72136	0	0.713553	1.77944	0.453082	2.94607		4.29034	21.7196	1.42036	0	0.372425	1.5775	0.422582	2.3725		4.90966	27.2804	4.02236	0	1.05468	1.98137	0.483581	3.51964				2.94607	0.573566
Subsolidus	4.4	23.6	2.30624	0	0.604706	1.71407	0.433382	2.75216		4.09883	20.8904	1.04155	0	0.273099	1.51727	0.403718	2.19408		4.70117	26.3096	3.57093	0	0.936313	1.91087	0.463046	3.31023				2.75216	0.558072
Subsolidus	3	19.4	2.07561	0	0.544235	1.40902	0.295488	2.24875		2.75951	17.031	0.954775	0	0.250346	1.23696	0.271801	1.75911		3.24049	21.769	3.19645	0	0.838125	1.58108	0.319175	2.73838				2.24875	0.489634
Subsolidus	3.1	20.6	2.02949	0	0.532141	1.49618	0.305338	2.33366		2.85354	18.1319	0.871947	0	0.228628	1.31692	0.281063	1.82661		3.34646	23.0681	3.18703	0	0.835654	1.67543	0.329612	2.8407				2.33366	0.507044
Subsolidus	3.2	18.9	1.84499	0	0.483765	1.37271	0.315187	2.17166		2.95208	16.5727	0.742706	0	0.194741	1.20368	0.290768	1.68919		3.44792	21.2273	2.94728	0	0.772789	1.54174	0.339606	2.65413				2.17166	0.482471
Subsolidus	4.51	25.57	1.65127	0	0.43297	1.85715	0.444217	2.73434		4.2026	22.7067	0.339795	0	0.0890959	1.64919	0.413939	2.15222		4.8174	28.4333	2.96274	0	0.776843	2.06511	0.474494	3.31645				2.73434	0.582111
Subsolidus	2.8	16.8	2.26011	0	0.592612	1.22018	0.275789	2.08858		2.57184	14.6507	1.21725	0	0.319168	1.06408	0.253316	1.63656		3.02816	18.9493	3.30298	0	0.866056	1.37629	0.298262	2.54061				2.08858	0.452022
Subsolidus	2.9	19.2	1.98336	0	0.520047	1.3945	0.285638	2.20018		2.66408	16.8477	0.871577	0	0.228531	1.22365	0.262402	1.71458		3.13592	21.5523	3.09515	0	0.811563	1.56534	0.308875	2.68578				2.20018	0.4856
Subsolidus	4.3	21.7	2.58299	0	0.677271	1.57607	0.423533	2.67687		4.00484	19.1422	1.36995	0	0.359207	1.3903	0.39446	2.14397		4.59516	24.2578	3.79602	0	0.995335	1.76184	0.452605	3.20978				2.67687	0.532908
Subsolidus	3.8	22.7	2.35236	0	0.6168	1.6487	0.374285	2.63979		3.52235	20.0619	1.11865	0	0.293316	1.4571	0.346938	2.09735		4.07765	25.3381	3.58607	0	0.940284	1.84031	0.401632	3.18222				2.63979	0.542437
Subsolidus	4.96	27.03	2.15403	0	0.564796	1.96319	0.48854	3.01652		4.63504	24.0553	0.787603	0	0.206513	1.74714	0.456533	2.41018		5.28496	30.0047	3.52045	0	0.923078	2.17924	0.520547	3.62287				3.01652	0.606343
Subsolidus	3.7	18.2	2.16786	0	0.568424	1.32187	0.364435	2.25472		3.43259	15.9315	1.0753	0	0.281948	1.1571	0.338096	1.77715		3.96741	20.4685	3.26043	0	0.854899	1.48663	0.390774	2.7323				2.25472	0.477575
Subsolidus	3.6	22.3	2.39849	0	0.628894	1.61965	0.354586	2.60313		3.33067	19.6939	1.17752	0	0.308752	1.43037	0.328057	2.06718		3.86933	24.9061	3.61945	0	0.949036	1.80893	0.381114	3.13908				2.60313	0.535949
Subsolidus	5.66	27.09	2.61066	0	0.684527	1.96755	0.557487	3.20956		5.31267	24.1107	1.2288	0	0.322197	1.75116	0.523276	2.59663		6.00733	30.0693	3.99252	0	1.04686	2.18393	0.591698	3.82249				3.20956	0.612929
Subsolidus	3.7	24.2	2.44461	0	0.640988	1.75765	0.364435	2.76307		3.42397	21.4432	1.1654	0	0.305572	1.55742	0.337247	2.20024		3.97603	26.9568	3.72383	0	0.976405	1.95787	0.391623	3.3259				2.76307	0.562831
Subsolidus	3.2	22	1.98336	0	0.520047	1.59786	0.315187	2.43309		2.94732	19.4181	0.783292	0	0.205383	1.41034	0.2903	1.90602		3.45268	24.5819	3.18344	0	0.834712	1.78538	0.340075	2.96017				2.43309	0.527074
Subsolidus	4.1	22.5	2.95198	0	0.774024	1.63417	0.403834	2.81203		3.81097	19.8778	1.70915	0	0.448148	1.44373	0.375365	2.26724		4.38903	25.1222	4.19482	0	1.0999	1.82462	0.432302	3.35683				2.81203	0.544793
Subsolidus	4.7	24.5	2.67524	0	0.701459	1.77944	0.462931	2.94383		4.38689	21.7196	1.37432	0	0.360353	1.5775	0.432092	2.36994		5.01311	27.2804	3.97615	0	1.04257	1.98137	0.493771	3.51771				2.94383	0.573884
Subsolidus	4.6	23.4	1.93724	0	0.507953	1.69954	0.453082	2.66058		4.29218	20.7062	0.683899	0	0.179321	1.50389	0.422762	2.10597		4.90782	26.0938	3.19058	0	0.836585	1.89519	0.483401	3.21518				2.66058	0.554603
Subsolidus	4.2	19	2.12174	0	0.55633	1.37997	0.413683	2.34998		3.91227	16.6643	1.00089	0	0.262438	1.21033	0.385343	1.85811		4.48773	21.3357	3.24259	0	0.850221	1.54961	0.442023	2.84186				2.34998	0.491875
Subsolidus	3.1	22	1.79887	0	0.471671	1.59786	0.305338	2.37487		2.85151	19.4181	0.603304	0	0.158189	1.41034	0.280863	1.84939		3.34849	24.5819	2.99443	0	0.785153	1.78538	0.329813	2.90035				2.37487	0.525477
Subsolidus	2.7	20.4	2.44461	0	0.640988	1.48165	0.265939	2.38858		2.47032	17.9484	1.28777	0	0.337658	1.30359	0.243316	1.88456		2.92968	22.8516	3.60146	0	0.944319	1.65972	0.288562	2.8926				2.38858	0.504016
Subsolidus	2.9	25.9	2.90586	0	0.76193	1.88112	0.285638	2.92869		2.65258	23.0114	1.57409	0	0.412733	1.67132	0.261269	2.34532		3.14742	28.7886	4.23763	0	1.11113	2.09091	0.310008	3.51205				2.92869	0.583364
Subsolidus	2.6	30.1	2.72136	0	0.713553	2.18616	0.25609	3.15581		2.35729	26.8982	1.27525	0	0.334375	1.95361	0.232183	2.52017		2.84271	33.3018	4.16748	0	1.09273	2.41871	0.279996	3.79144				3.15581	0.635634
Subsolidus	4.05	24.78	1.67433	0	0.439017	1.79977	0.398909	2.6377		3.76032	21.9779	0.389577	0	0.102149	1.59626	0.370377	2.06878		4.33968	27.5821	2.95908	0	0.775885	2.00329	0.427441	3.20661				2.6377	0.568915
Subsolidus	4.86	26.04	2.14019	0	0.561167	1.89129	0.478691	2.93114		4.53968	23.1406	0.803378	0	0.210649	1.6807	0.447141	2.33849		5.18032	28.9394	3.477	0	0.911685	2.10187	0.510241	3.5238				2.93114	0.592652
Subsolidus	5.38	26.94	2.59682	0	0.680899	1.95665	0.529908	3.16746		5.04144	23.972	1.22162	0	0.320315	1.74109	0.496561	2.55797		5.71856	29.908	3.97203	0	1.04148	2.17222	0.563256	3.77695				3.16746	0.609494
Subsolidus	4.06	25.44	1.76658	0	0.463205	1.84771	0.399894	2.71081		3.76896	22.5868	0.460593	0	0.120769	1.64048	0.371228	2.13247		4.35104	28.2932	3.07256	0	0.80564	2.05494	0.42856	3.28914				2.71081	0.578331
Subsolidus	3.2	23.25	1.42526	0	0.373708	1.68865	0.315187	2.37754		2.94572	20.5682	0.198006	0	0.0519181	1.49387	0.290141	1.83593		3.45428	25.9318	2.6525	0	0.695499	1.88343	0.340233	2.91916				2.37754	0.541615
Subsolidus	4.8	26.01	2.05255	0	0.538188	1.88911	0.472781	2.90008		4.48179	23.1129	0.71869	0	0.188444	1.67869	0.441439	2.30857		5.11821	28.9071	3.38641	0	0.887933	2.09952	0.504123	3.49158				2.90008	0.591504
Subsolidus	5	26.6	3.32098	0	0.870777	1.93196	0.49248	3.29521		4.67375	23.6578	1.94444	0	0.509841	1.71827	0.460346	2.68845		5.32625	29.5422	4.69753	0	1.23171	2.14565	0.524614	3.90198				3.29521	0.606762
Subsolidus	5.67	27.49	1.96491	0	0.51521	1.9966	0.558472	3.07028		5.32216	24.4806	0.583166	0	0.152909	1.77803	0.524211	2.45515		6.01784	30.4994	3.34666	0	0.87751	2.21517	0.592733	3.68542				3.07028	0.615135
Subsolidus	5	24.1	3.04423	0	0.798212	1.75038	0.49248	3.04108		4.67707	21.3509	1.74501	0	0.457548	1.55072	0.460672	2.46894		5.32293	26.8491	4.34346	0	1.13888	1.95005	0.524288	3.61321				3.04108	0.572138
Subsolidus	3.9	22.8	2.72136	0	0.713553	1.65596	0.384134	2.75365		3.61819	20.1539	1.47624	0	0.387078	1.46378	0.356378	2.20723		4.18181	25.4461	3.96648	0	1.04003	1.84815	0.411891	3.30007				2.75365	0.54642
Subsolidus	4.8	23.3	2.90586	0	0.76193	1.69228	0.472781	2.92699		4.48489	20.614	1.63447	0	0.428566	1.4972	0.441744	2.36751		5.11511	25.986	4.17725	0	1.09529	1.88736	0.503818	3.48647				2.92699	0.559483
Subsolidus	5.3	23.1	3.36711	0	0.882871	1.67775	0.522029	3.08265		4.96836	20.4298	2.08759	0	0.547375	1.48382	0.489363	2.52056		5.63164	25.7702	4.64663	0	1.21837	1.87169	0.554694	3.64475				3.08265	0.562095
Subsolidus	5.5	23.1	3.04423	0	0.798212	1.67775	0.541728	3.01769		5.16218	20.4298	1.76992	0	0.464081	1.48382	0.508454	2.45635		5.83782	25.7702	4.31855	0	1.13234	1.87169	0.575002	3.57903				3.01769	0.561339
Subsolidus	4.9	23.4	2.85974	0	0.749836	1.69954	0.48263	2.93201		4.58139	20.7061	1.58553	0	0.415733	1.50388	0.451248	2.37087		5.21861	26.0939	4.13394	0	1.08394	1.8952	0.514013	3.49315				2.93201	0.561143
Subsolidus	5.2	22.9	3.36711	0	0.882871	1.66323	0.512179	3.05828		4.87183	20.2458	2.09422	0	0.549114	1.47045	0.479855	2.49942		5.52817	25.5542	4.64	0	1.21663	1.856	0.544503	3.61713				3.05828	0.558858
Subsolidus	5.6	26.1	3.45936	0	0.907059	1.89564	0.551578	3.35428		5.25533	23.1959	2.08956	0	0.547892	1.68472	0.517629	2.75024		5.94467	29.0041	4.82916	0	1.26623	2.10657	0.585526	3.95832				3.35428	0.604043
Subsolidus	5.4	23.4	2.99811	0	0.786118	1.69954	0.531878	3.01754		5.06498	20.7061	1.71686	0	0.450168	1.50388	0.49888	2.45293		5.73502	26.0939	4.27936	0	1.12207	1.8952	0.564877	3.58215				3.01754	0.56461
Subsolidus	4.1	23.6	2.62911	0	0.689365	1.71407	0.403834	2.80727		3.80962	20.8904	1.36054	0	0.35674	1.51727	0.375232	2.24924		4.39038	26.3096	3.89768	0	1.02199	1.91087	0.432435	3.36529				2.80727	0.558027
Subsolidus	5.6	22.8	3.45936	0	0.907059	1.65596	0.551578	3.1146		5.25926	20.1537	2.18404	0	0.572666	1.46376	0.518016	2.55445		5.94074	25.4463	4.73467	0	1.24145	1.84816	0.585139	3.67476				3.1146	0.560154
Subsolidus	3.2	23.6	2.44461	0	0.640988	1.71407	0.315187	2.67024		2.94455	20.8904	1.18729	0	0.311312	1.51727	0.290026	2.11861		3.45545	26.3096	3.70194	0	0.970665	1.91086	0.340348	3.22188				2.67024	0.551633
Subsolidus	2.3	19.8	1.70662	0	0.447483	1.43807	0.226541	2.1121		2.08899	17.3979	0.587257	0	0.153981	1.26361	0.205757	1.62335		2.51101	22.2021	2.82598	0	0.740984	1.61254	0.247324	2.60084				2.1121	0.488747
Subsolidus	4.7	25.4	2.62911	0	0.689365	1.8448	0.462931	2.9971		4.38573	22.5498	1.30295	0	0.341639	1.63779	0.431977	2.41141		5.01427	28.2502	3.95527	0	1.03709	2.05181	0.493885	3.58279				2.9971	0.585692
Subsolidus	3.8	23.1	1.89112	0	0.495859	1.67775	0.374285	2.5479		3.52204	20.43	0.654536	0	0.171622	1.48383	0.346907	2.00236		4.07796	25.77	3.12769	0	0.820096	1.87167	0.401663	3.09343				2.5479	0.545534
Subsolidus	3.6	23.8	1.66049	0	0.435388	1.72859	0.354586	2.51857		3.32888	21.0747	0.408982	0	0.107237	1.53065	0.327881	1.96577		3.87112	26.5253	2.912	0	0.76354	1.92653	0.38129	3.07136				2.51857	0.552796
Subsolidus	4.1	26.8	2.21399	0	0.580518	1.94648	0.403834	2.93084		3.80531	23.8427	0.859939	0	0.22548	1.7317	0.374808	2.33199		4.39469	29.7573	3.56804	0	0.935556	2.16127	0.432859	3.52968				2.93084	0.598849
Subsolidus	4.9	25.8	2.58299	0	0.677271	1.87385	0.48263	3.03376		4.57844	22.919	1.24453	0	0.32632	1.6646	0.450958	2.44188		5.22156	28.681	3.92145	0	1.02822	2.0831	0.514303	3.62563				3.03376	0.591873
Subsolidus	4.9	22.7	2.44461	0	0.640988	1.6487	0.48263	2.77232		4.58246	20.0618	1.19947	0	0.314506	1.45709	0.451354	2.22295		5.21754	25.3382	3.68976	0	0.967471	1.84031	0.513907	3.32169				2.77232	0.549372
Subsolidus	4.3	22.7	2.67524	0	0.701459	1.6487	0.423533	2.77369		4.00346	20.0618	1.43058	0	0.375104	1.45709	0.394325	2.22652		4.59654	25.3382	3.91989	0	1.02781	1.84031	0.45274	3.32087				2.77369	0.547173
Subsolidus	4.6	22.5	2.44461	0	0.640988	1.63417	0.453082	2.72825		4.29309	19.8778	1.208	0	0.316744	1.44373	0.422852	2.18332		4.90691	25.1222	3.68122	0	0.965233	1.82462	0.483311	3.27317				2.72825	0.544923
Subsolidus	4.6	25.3	2.02949	0	0.532141	1.83754	0.453082	2.82276		4.28962	22.4575	0.718379	0	0.188362	1.63109	0.422511	2.24196		4.91038	28.1425	3.3406	0	0.87592	2.04399	0.483653	3.40356				2.82276	0.580799
Subsolidus	4.9	25.8	3.50548	0	0.919153	1.87385	0.48263	3.27564		4.57803	22.9189	2.14872	0	0.563405	1.6646	0.450917	2.67892		5.22197	28.6811	4.86224	0	1.2749	2.08311	0.514343	3.87235				3.27564	0.596715
Subsolidus	4.1	25.9	2.58299	0	0.677271	1.88112	0.403834	2.96222		3.80641	23.0113	1.2481	0	0.327257	1.67131	0.374916	2.37349		4.39359	28.7887	3.91787	0	1.02728	2.09092	0.432751	3.55096				2.96222	0.588734
Subsolidus	4.8	27	3.13648	0	0.8224	1.96101	0.472781	3.25619		4.47997	24.0275	1.75379	0	0.459853	1.74512	0.441259	2.64623		5.12003	29.9725	4.51917	0	1.18495	2.1769	0.504302	3.86615				3.25619	0.609961
Subsolidus	4.6	25.2	2.26011	0	0.592612	1.83028	0.453082	2.87597		4.28964	22.3652	0.947633	0	0.248474	1.62439	0.422512	2.29537		4.91036	28.0348	3.57259	0	0.93675	2.03616	0.483651	3.45657				2.87597	0.580596
Subsolidus	4.9	28.7	2.49074	0	0.653083	2.08448	0.48263	3.22019		4.57466	25.6005	1.07126	0	0.280889	1.85936	0.450586	2.59084		5.22534	31.7995	3.91022	0	1.02528	2.3096	0.514675	3.84955				3.22019	0.629356
Subsolidus	5.4	25.1	2.95198	0	0.774024	1.82301	0.531878	3.12892		5.06294	22.2729	1.62249	0	0.425424	1.61768	0.498679	2.54178		5.73706	27.9271	4.28148	0	1.12262	2.02835	0.565078	3.71605				3.12892	0.587132
Subsolidus	5.1	28	2.39849	0	0.628894	2.03364	0.50233	3.16486		4.76908	24.9524	0.998919	0	0.261921	1.8123	0.469735	2.54395		5.43092	31.0476	3.79806	0	0.995868	2.25498	0.534924	3.78578				3.16486	0.620911
Subsolidus	4.8	26.5	3.18261	0	0.834494	1.9247	0.472781	3.23197		4.48062	23.5654	1.81322	0	0.475435	1.71156	0.441323	2.62831		5.11938	29.4346	4.552	0	1.19355	2.13783	0.504239	3.83563				3.23197	0.603655
Subsolidus	4.5	25.1	2.90586	0	0.76193	1.82301	0.443232	3.02817		4.19296	22.273	1.58458	0	0.415483	1.61769	0.41299	2.44616		4.80704	27.927	4.22714	0	1.10838	2.02834	0.473474	3.61019				3.02817	0.582016
Subsolidus	4.5	25.7	2.16786	0	0.568424	1.86659	0.443232	2.87825		4.19252	22.8267	0.843347	0	0.221129	1.6579	0.412946	2.29198		4.80748	28.5733	3.49238	0	0.915718	2.07528	0.473518	3.46452				2.87825	0.586268
Subsolidus	4.6	24.7	2.76749	0	0.725647	1.79396	0.453082	2.97269		4.29006	21.904	1.45974	0	0.382752	1.59089	0.422554	2.3962		4.90994	27.496	4.07523	0	1.06854	1.99703	0.48361	3.54918				2.97269	0.576494
Subsolidus	4.7	25.7	2.39849	0	0.628894	1.86659	0.462931	2.95842		4.38545	22.8267	1.06804	0	0.280044	1.6579	0.431949	2.36989		5.01455	28.5733	3.72894	0	0.977745	2.07528	0.493913	3.54694				2.95842	0.588523
Subsolidus	3.2	21.8	2.44461	0	0.640988	1.58333	0.315187	2.53951		2.94735	19.2342	1.24114	0	0.325432	1.39698	0.290302	2.01272		3.45265	24.3658	3.64809	0	0.956545	1.76969	0.340072	3.0663				2.53951	0.526792
Subsolidus	3.04	24.26	1.36529	0	0.357986	1.762	0.299428	2.41942		2.79061	21.4986	0.109949	0	0.028829	1.56144	0.274864	1.86514		3.28939	27.0214	2.62064	0	0.687143	1.96256	0.323992	2.9737				2.41942	0.554282
Subsolidus	3.82	23.22	1.54979	0	0.406363	1.68647	0.376255	2.46909		3.54129	20.5405	0.315871	0	0.0828228	1.49186	0.348803	1.92348		4.09871	25.8995	2.78371	0	0.729902	1.88108	0.403706	3.01469				2.46909	0.545601
Subsolidus	4.45	25.63	1.82654	0	0.478927	1.86151	0.438307	2.77874		4.14455	22.7621	0.51069	0	0.133905	1.65321	0.408222	2.19534		4.75545	28.4979	3.14239	0	0.823949	2.0698	0.468393	3.36214				2.77874	0.583403
Subsolidus	3.25	22.28	1.52212	0	0.399106	1.6182	0.320112	2.33741		2.99515	19.6756	0.322097	0	0.0844553	1.42904	0.29501	1.80851		3.50485	24.8844	2.72214	0	0.713757	1.80735	0.345214	2.86632				2.33741	0.528908
Subsolidus	2.02	22.16	1.25921	0	0.33017	1.60948	0.198962	2.13861		1.81703	19.5654	0.0777119	0	0.0203764	1.42103	0.17897	1.62038		2.22297	24.7546	2.4407	0	0.639963	1.79793	0.218954	2.65684				2.13861	0.518232
Subsolidus	4.17	23.73	2.24166	0	0.587774	1.72351	0.410728	2.72201		3.87705	21.0101	0.976357	0	0.256005	1.52596	0.381874	2.16384		4.46295	26.4499	3.50697	0	0.919543	1.92105	0.439582	3.28018				2.72201	0.558168
Subsolidus	3.17	25.22	1.43448	0	0.376127	1.83173	0.312232	2.52009		2.91377	22.3839	0.148132	0	0.0388409	1.62574	0.286995	1.95158		3.42623	28.0561	2.72083	0	0.713414	2.03772	0.33747	3.0886				2.52009	0.568513
Subsolidus	2.58	22.09	1.26382	0	0.331379	1.6044	0.25412	2.1899		2.35334	19.501	0.0800699	0	0.0209947	1.41636	0.231795	1.66914		2.80666	24.679	2.44757	0	0.641763	1.79244	0.276444	2.71065				2.1899	0.52075
Subsolidus	2.43	19.8	1.42064	0	0.372499	1.43807	0.239345	2.04992		2.21358	17.3979	0.306063	0	0.0802511	1.26361	0.218029	1.56189		2.64642	22.2021	2.53522	0	0.664747	1.61254	0.260662	2.53795				2.04992	0.488027
Subsolidus	4.3	23.1	2.67524	0	0.701459	1.67775	0.423533	2.80274		4.00293	20.43	1.41876	0	0.372006	1.48383	0.394272	2.25011		4.59707	25.77	3.93171	0	1.03091	1.87168	0.452793	3.35538				2.80274	0.552639
Subsolidus	5.2	28.7	3.22873	0	0.846589	2.08448	0.512179	3.44325		4.8646	25.6004	1.79342	0	0.470243	1.85936	0.479143	2.80875		5.5354	31.7996	4.66405	0	1.22293	2.3096	0.545215	4.07775				3.44325	0.634503
Subsolidus	4	26.5	3.55161	0	0.931247	1.9247	0.393984	3.24993		3.70874	23.5655	2.18111	0	0.571896	1.71156	0.365296	2.64875		4.29126	29.4345	4.92211	0	1.2906	2.13783	0.422672	3.8511				3.24993	0.601174
Subsolidus	4.4	22.5	2.85974	0	0.749836	1.63417	0.433382	2.81739		4.10001	19.8778	1.61626	0	0.42379	1.44373	0.403835	2.27135		4.69999	25.1222	4.10321	0	1.07588	1.82462	0.46293	3.36344				2.81739	0.546043
Subsolidus	4.3	25.1	2.44461	0	0.640988	1.82301	0.423533	2.88753		4.00032	22.273	1.13401	0	0.297344	1.61769	0.394016	2.30905		4.59968	27.927	3.75521	0	0.984633	2.02834	0.45305	3.46602				2.88753	0.578487
Subsolidus	3.1	20.6	2.53686	0	0.665177	1.49618	0.305338	2.46669		2.85323	18.1319	1.36851	0	0.35883	1.31692	0.281032	1.95678		3.34677	23.0681	3.70521	0	0.971524	1.67544	0.329643	2.9766				2.46669	0.509911
Subsolidus	3.7	27.7	2.58299	0	0.677271	2.01185	0.364435	3.05356		3.41864	24.675	1.19943	0	0.314497	1.79214	0.336722	2.44336		3.98136	30.725	3.96654	0	1.04004	2.23156	0.392148	3.66375				3.05356	0.610196
Subsolidus	4.6	26.4	2.30624	0	0.604706	1.91743	0.453082	2.97522		4.28801	23.4731	0.958058	0	0.251207	1.70485	0.422352	2.37841		4.91199	29.3269	3.65442	0	0.958205	2.13001	0.483812	3.57203				2.97522	0.59681
Subsolidus	5	21	1.93724	0	0.507953	1.52523	0.49248	2.52566		4.6814	18.4991	0.752173	0	0.197223	1.34359	0.461099	2.00191		5.3186	23.5009	3.12231	0	0.818683	1.70687	0.523861	3.04942				2.52566	0.523754
Subsolidus	4.1	22.7	1.93724	0	0.507953	1.6487	0.403834	2.56049		3.81122	20.0619	0.709152	0	0.185943	1.4571	0.37539	2.01843		4.38878	25.3381	3.16533	0	0.829963	1.84031	0.432277	3.10255				2.56049	0.542059
Subsolidus	4.1	22.8	2.67524	0	0.701459	1.65596	0.403834	2.76126		3.8107	20.1539	1.42935	0	0.374783	1.46378	0.375338	2.2139		4.3893	25.4461	3.92112	0	1.02814	1.84815	0.432329	3.30862				2.76126	0.54736
Subsolidus	4	21	1.84499	0	0.483765	1.52523	0.393984	2.40298		3.71735	18.4992	0.670931	0	0.175921	1.34359	0.366145	1.88566		4.28265	23.5008	3.01905	0	0.791609	1.70687	0.421823	2.9203				2.40298	0.51732
Subsolidus	3.8	19.8	1.38374	0	0.362824	1.43807	0.374285	2.17518		3.52695	17.3978	0.257527	0	0.0675247	1.2636	0.34739	1.67852		4.07305	22.2022	2.50996	0	0.658123	1.61254	0.401179	2.67185				2.17518	0.496664
Subsolidus	2.4	21.6	1.33762	0	0.35073	1.56881	0.23639	2.15593		2.18178	19.0505	0.169025	0	0.0443191	1.38364	0.214897	1.64286		2.61822	24.1495	2.50621	0	0.65714	1.75398	0.257884	2.669				2.15593	0.513071
Subsolidus	4.9	23.8	2.49074	0	0.653083	1.72859	0.48263	2.86431		4.58105	21.0745	1.21227	0	0.317863	1.53064	0.451215	2.29972		5.21895	26.5255	3.7692	0	0.988302	1.92654	0.514045	3.42889				2.86431	0.564585
Subsolidus	3.6	20	2.39849	0	0.628894	1.4526	0.354586	2.43608		3.33396	17.5812	1.24686	0	0.326932	1.27692	0.328382	1.93224		3.86604	22.4188	3.55011	0	0.930856	1.62828	0.38079	2.93992				2.43608	0.503841
Subsolidus	4.6	26.7	2.58299	0	0.677271	1.93922	0.453082	3.06957		4.28747	23.7503	1.22102	0	0.320158	1.72498	0.422298	2.46744		4.91253	29.6497	3.94495	0	1.03438	2.15346	0.483865	3.67171				3.06957	0.602134
Subsolidus	3.1	19.9	2.26011	0	0.592612	1.44534	0.305338	2.34329		2.85447	17.4895	1.11906	0	0.293423	1.27027	0.281154	1.84484		3.34553	22.3105	3.40117	0	0.891801	1.62041	0.329521	2.84173				2.34329	0.498444
Subsolidus	3.5	21.8	1.89112	0	0.495859	1.58333	0.344736	2.42393		3.23563	19.2342	0.696342	0	0.182584	1.39698	0.318697	1.89826		3.76437	24.3658	3.08589	0	0.809134	1.76968	0.370775	2.94959				2.42393	0.525665
Subsolidus	4.8	23.2	2.35236	0	0.6168	1.68502	0.472781	2.7746		4.48528	20.522	1.09515	0	0.287154	1.49051	0.441782	2.21945		5.11472	25.878	3.60957	0	0.946446	1.87952	0.503779	3.32975				2.7746	0.555148
Subsolidus	4.3	24.4	2.02949	0	0.532141	1.77217	0.423533	2.72785		4.0015	21.6275	0.747335	0	0.195955	1.57081	0.394131	2.16089		4.5985	27.1725	3.31164	0	0.868328	1.97354	0.452934	3.2948				2.72785	0.566954
Subsolidus	4.2	22.6	1.75274	0	0.459577	1.64144	0.413683	2.5147		3.90775	19.9699	0.530332	0	0.139056	1.45041	0.384898	1.97437		4.49225	25.2301	2.97515	0	0.780098	1.83246	0.442469	3.05503				2.5147	0.540332
Subsolidus	2.7	23	1.84499	0	0.483765	1.67049	0.265939	2.42019		2.46636	20.3381	0.62149	0	0.162957	1.47716	0.242927	1.88304		2.93364	25.6619	3.06849	0	0.804572	1.86382	0.288952	2.95735				2.42019	0.537155
Subsolidus	4.8	23.2	1.38374	0	0.362824	1.68502	0.472781	2.52062		4.48576	20.5221	0.144913	0	0.0379967	1.49052	0.44183	1.97034		5.11424	25.8779	2.62257	0	0.687651	1.87952	0.503732	3.0709				2.52062	0.550278
Subsolidus	4.8	25.1	2.76749	0	0.725647	1.82301	0.472781	3.02144		4.48264	22.2729	1.44649	0	0.379277	1.61768	0.441522	2.43848		5.11736	27.9271	4.08848	0	1.07202	2.02834	0.504039	3.6044				3.02144	0.582957
Subsolidus	3.2	21.5	1.98336	0	0.520047	1.56155	0.315187	2.39678		2.94809	18.9585	0.798465	0	0.209361	1.37696	0.290375	1.8767		3.45191	24.0415	3.16826	0	0.830733	1.74613	0.339999	2.91686				2.39678	0.520084
Subsolidus	5	47.5	2.26011	0	0.592612	3.44992	0.49248	4.53502		4.64603	43.188	0.368175	0	0.0965371	3.13675	0.457615	3.6909		5.35397	51.812	4.15205	0	1.08869	3.7631	0.527345	5.37913				4.53502	0.844117
Subsolidus	4.2	21.1	2.26011	0	0.592612	1.53249	0.413683	2.53879		3.90948	18.591	1.07271	0	0.281269	1.35026	0.385068	2.0166		4.49052	23.609	3.44752	0	0.903955	1.71472	0.442298	3.06098				2.53879	0.52219
Subsolidus	4.4	23.4	2.39849	0	0.628894	1.69954	0.433382	2.76182		4.09905	20.7062	1.13789	0	0.298359	1.50389	0.40374	2.20599		4.70095	26.0938	3.65909	0	0.959429	1.8952	0.463025	3.31765				2.76182	0.55583
Subsolidus	3.7	19.5	1.98336	0	0.520047	1.41629	0.364435	2.30077		3.43094	17.1227	0.854981	0	0.22418	1.24362	0.337933	1.80573		3.96906	21.8773	3.11175	0	0.815915	1.58895	0.390937	2.7958				2.30077	0.495035
Subsolidus	3.2	23.5	1.98336	0	0.520047	1.70681	0.315187	2.54204		2.94498	20.7984	0.738089	0	0.19353	1.51059	0.290069	1.99418		3.45502	26.2016	3.22864	0	0.846564	1.90302	0.340305	3.08989				2.54204	0.547855
Subsolidus	3.1	21.6	2.12174	0	0.55633	1.56881	0.305338	2.43048		2.85194	19.0504	0.931847	0	0.244334	1.38363	0.280904	1.90887		3.34806	24.1496	3.31163	0	0.868325	1.75398	0.329771	2.95208				2.43048	0.521603
Subsolidus	4.7	26.3	3.09036	0	0.810306	1.91017	0.462931	3.18341		4.38432	23.3807	1.72929	0	0.453428	1.69814	0.431838	2.5834		5.01568	29.2193	4.45143	0	1.16718	2.1222	0.494024	3.78341				3.18341	0.600002
Subsolidus	5.8	29.7	2.58299	0	0.677271	2.15711	0.571277	3.40566		5.44532	26.527	1.12729	0	0.295582	1.92666	0.536343	2.75858		6.15468	32.873	4.03868	0	1.05896	2.38756	0.606211	4.05273				3.40566	0.647076
Subsolidus	4.9	21.7	2.30624	0	0.604706	1.57607	0.48263	2.66341		4.58376	19.1422	1.0936	0	0.286748	1.3903	0.451482	2.12853		5.21624	24.2578	3.51887	0	0.922664	1.76185	0.513779	3.19829				2.66341	0.534881
Subsolidus	4.5	22.2	2.62911	0	0.689365	1.61239	0.443232	2.74498		4.19693	19.6019	1.39847	0	0.366686	1.42368	0.413381	2.20375		4.80307	24.7981	3.85975	0	1.01204	1.80109	0.473083	3.28621				2.74498	0.541231
Subsolidus	4.3	18.5	1.98336	0	0.520047	1.34366	0.423533	2.28724		4.00924	16.2062	0.879819	0	0.230693	1.17706	0.394894	1.80264		4.59076	20.7938	3.08691	0	0.809402	1.51025	0.452172	2.77183				2.28724	0.484593
Subsolidus	2.8	21.4	1.75274	0	0.459577	1.55428	0.275789	2.28965		2.56492	18.8667	0.578936	0	0.1518	1.37029	0.252635	1.77472		3.03508	23.9333	2.92655	0	0.767354	1.73828	0.298943	2.80457				2.28965	0.514924
Subsolidus	4.3	21.5	2.76749	0	0.725647	1.56155	0.423533	2.71073		4.00501	18.9584	1.55648	0	0.408115	1.37695	0.394477	2.17954		4.59499	24.0416	3.97849	0	1.04318	1.74614	0.452589	3.24191				2.71073	0.531184
Subsolidus	4.3	20.9	2.30624	0	0.604706	1.51797	0.423533	2.54621		4.00602	18.4073	1.12298	0	0.294449	1.33692	0.394577	2.02595		4.59398	23.3927	3.4895	0	0.914963	1.69901	0.452488	3.06647				2.54621	0.52026
Subsolidus	3.9	21.44	1.33301	0	0.34952	1.55719	0.384134	2.29084		3.62086	18.9034	0.156442	0	0.0410198	1.37295	0.35664	1.77061		4.17914	23.9766	2.50957	0	0.65802	1.74142	0.411629	2.81107				2.29084	0.520229
Subsolidus	3.35	21.09	1.24076	0	0.325332	1.53177	0.329962	2.18706		3.09308	18.5819	0.0816592	0	0.0214114	1.3496	0.304656	1.67567		3.60692	23.5981	2.39985	0	0.629252	1.71393	0.355267	2.69845				2.18706	0.511389
Subsolidus	2.68	24.06	1.02858	0	0.269699	1.74748	0.263969	2.28115		2.44592	21.3143	-0.211955	0	-0.0555756	1.54806	0.240913	1.7334		2.91408	26.8057	2.26912	0	0.594973	1.9469	0.287026	2.82889				2.28115	0.547749
Subsolidus	4.52	22.86	1.44371	0	0.378546	1.66032	0.445202	2.48407		4.21596	20.2091	0.216447	0	0.0567534	1.46779	0.415255	1.9398		4.82404	25.5109	2.67096	0	0.700339	1.85286	0.475149	3.02834				2.48407	0.544273
Subsolidus	4.2	22.22	1.27304	0	0.333798	1.61384	0.413683	2.36132		3.90852	19.6204	0.0711153	0	0.0186468	1.42503	0.384973	1.82865		4.49148	24.8196	2.47497	0	0.648949	1.80265	0.442393	2.89399				2.36132	0.532671
Subsolidus	2.87	22.67	1.21769	0	0.319285	1.64652	0.282684	2.24849		2.63027	20.0344	0.014635	0	0.00383736	1.4551	0.259071	1.71801		3.10973	25.3056	2.42075	0	0.634732	1.83794	0.306296	2.77897				2.24849	0.530481
Subsolidus	2.49	22.97	1.30533	0	0.342264	1.66831	0.245255	2.25583		2.26556	20.3105	0.0945496	0	0.0247913	1.47515	0.223149	1.72309		2.71444	25.6295	2.51611	0	0.659736	1.86147	0.267361	2.78857				2.25583	0.532736
Subsolidus	3.1	24	2.30624	0	0.604706	1.74312	0.305338	2.65316		2.84802	21.2589	1.04057	0	0.272843	1.54404	0.280518	2.0974		3.35198	26.7411	3.5719	0	0.936569	1.9422	0.330157	3.20893				2.65316	0.555765
Subsolidus	3.4	23	2.67524	0	0.701459	1.67049	0.334886	2.70684		3.13736	20.338	1.42939	0	0.374793	1.47715	0.309017	2.16096		3.66264	25.662	3.92108	0	1.02813	1.86383	0.360756	3.25271				2.70684	0.545878
Subsolidus	5.1	20.1	2.07561	0	0.544235	1.45986	0.50233	2.50643		4.77904	17.6729	0.913901	0	0.239629	1.28358	0.470717	1.99393		5.42096	22.5271	3.23733	0	0.848842	1.63615	0.533942	3.01893				2.50643	0.512502
Subsolidus	3.9	19.5	1.66049	0	0.435388	1.41629	0.384134	2.23581		3.62331	17.1227	0.536971	0	0.140796	1.24362	0.356881	1.7413		4.17669	21.8773	2.78401	0	0.729981	1.58895	0.411388	2.73032				2.23581	0.494511
Subsolidus	3.1	24.1	1.93724	0	0.507953	1.75038	0.305338	2.56367		2.84808	21.3511	0.675707	0	0.177174	1.55073	0.280525	2.00843		3.35192	26.8489	3.19877	0	0.838733	1.95003	0.33015	3.11892				2.56367	0.555244
Subsolidus	3.7	23.6	2.02949	0	0.532141	1.71407	0.364435	2.61064		3.42508	20.8904	0.776154	0	0.203511	1.51727	0.337357	2.05814		3.97492	26.3096	3.28283	0	0.860772	1.91086	0.391513	3.16315				2.61064	0.552505
Subsolidus	3.6	22.1	1.79887	0	0.471671	1.60512	0.354586	2.43138		3.3313	19.5101	0.595943	0	0.156259	1.41702	0.32812	1.90139		3.8687	24.6899	3.00179	0	0.787083	1.79323	0.381051	2.96136				2.43138	0.529986
Subsolidus	4.2	23.3	2.12174	0	0.55633	1.69228	0.413683	2.66229		3.9066	20.6141	0.871273	0	0.228452	1.4972	0.384785	2.11044		4.4934	25.9859	3.3722	0	0.884207	1.88735	0.442582	3.21414				2.66229	0.551852
Subsolidus	4.7	21.7	2.30624	0	0.604706	1.57607	0.462931	2.64371		4.39066	19.1422	1.09539	0	0.287215	1.3903	0.432463	2.10998		5.00934	24.2578	3.51709	0	0.922197	1.76184	0.4934	3.17744				2.64371	0.533733
Subsolidus	4.9	26.2	2.35236	0	0.6168	1.90291	0.48263	3.00234		4.57803	23.2883	1.0067	0	0.263961	1.69143	0.450918	2.40631		5.22197	29.1117	3.69803	0	0.96964	2.11438	0.514343	3.59836				3.00234	0.596026
Subsolidus	4.5	27.3	2.02949	0	0.532141	1.9828	0.443232	2.95817		4.1904	24.305	0.661148	0	0.173356	1.76527	0.412737	2.35136		4.8096	30.295	3.39783	0	0.890927	2.20033	0.473727	3.56498				2.95817	0.60681
Subsolidus	4.1	24.3	2.16786	0	0.568424	1.76491	0.403834	2.73717		3.80888	21.5353	0.887722	0	0.232765	1.56411	0.37516	2.17204		4.39112	27.0647	3.44801	0	0.904083	1.96571	0.432507	3.3023				2.73717	0.56513
Subsolidus	1.9	20.4	2.02949	0	0.532141	1.48165	0.187142	2.20094		1.70499	17.9484	0.887901	0	0.232812	1.3036	0.167934	1.70434		2.09501	22.8516	3.17108	0	0.831471	1.65971	0.206351	2.69753				2.20094	0.496595
Subsolidus	1.2	25.3	1.24537	0	0.326541	1.83754	0.118195	2.28228		1.02422	22.4578	-0.0264977	0	-0.00694782	1.63111	0.100881	1.72504		1.37578	28.1422	2.51723	0	0.66003	2.04397	0.135509	2.83951				2.28228	0.557232
Subsolidus	3.6	23.2	1.98336	0	0.520047	1.68502	0.354586	2.55965		3.32958	20.5221	0.743724	0	0.195008	1.49052	0.32795	2.01348		3.87042	25.8779	3.22301	0	0.845087	1.87951	0.381221	3.10582				2.55965	0.54617
Subsolidus	2.6	20.9	2.30624	0	0.604706	1.51797	0.25609	2.37876		2.37381	18.4074	1.13797	0	0.298381	1.33693	0.233811	1.86912		2.82619	23.3926	3.47451	0	0.911031	1.699	0.278368	2.8884				2.37876	0.509641
Subsolidus	5.3	43.9	3.41323	0	0.894965	3.18846	0.522029	4.60545		4.94131	39.7928	1.58483	0	0.41555	2.89015	0.486699	3.7924		5.65869	48.0072	5.24163	0	1.37438	3.48676	0.557359	5.4185				4.60545	0.81305
Subsolidus	4.2	38.6	3.36711	0	0.882871	2.80352	0.413683	4.10007		3.88383	34.818	1.67386	0	0.438894	2.52883	0.382542	3.35027		4.51617	42.382	5.06035	0	1.32685	3.07821	0.444825	4.84988				4.10007	0.749806
Subsolidus	2.8	17.7	2.16786	0	0.568424	1.28555	0.275789	2.12976		2.57053	15.4739	1.09927	0	0.288233	1.12387	0.253187	1.66529		3.02947	19.9261	3.23646	0	0.848615	1.44723	0.29839	2.59424				2.12976	0.464474
Subsolidus	3.4	23	2.53686	0	0.665177	1.67049	0.334886	2.67055		3.13743	20.338	1.29386	0	0.339257	1.47715	0.309025	2.12543		3.66257	25.662	3.77986	0	0.991096	1.86383	0.360748	3.21568				2.67055	0.545123
Subsolidus	5.1	23.7	2.39849	0	0.628894	1.72133	0.50233	2.85255		4.77455	20.9824	1.12309	0	0.29448	1.52395	0.470274	2.28871		5.42545	26.4176	3.67388	0	0.963308	1.91871	0.534385	3.4164				2.85255	0.563848
Subsolidus	2.6	23.1	2.12174	0	0.55633	1.67775	0.25609	2.49017		2.37017	20.4301	0.890597	0	0.233519	1.48384	0.233452	1.95081		2.82983	25.7699	3.35288	0	0.879141	1.87167	0.278727	3.02953				2.49017	0.539362
Subsolidus	3.6	23.7	2.16786	0	0.568424	1.72133	0.354586	2.64434		3.32873	20.9825	0.909714	0	0.238531	1.52396	0.327867	2.09036		3.87127	26.4175	3.42601	0	0.898316	1.9187	0.381304	3.19832				2.64434	0.553981
Subsolidus	3	23.8	2.39849	0	0.628894	1.72859	0.295488	2.65298		2.75233	21.0747	1.13775	0	0.298323	1.53065	0.271094	2.10007		3.24767	26.5253	3.65923	0	0.959466	1.92653	0.319882	3.20588				2.65298	0.552905
Subsolidus	5.4	26.1	2.58299	0	0.677271	1.89564	0.531878	3.10479		5.06186	23.1959	1.23192	0	0.323015	1.68472	0.498573	2.50631		5.73814	29.0041	3.93406	0	1.03153	2.10657	0.565183	3.70328				3.10479	0.598484
Subsolidus	3.9	24.2	2.49074	0	0.653083	1.75765	0.384134	2.79486		3.61633	21.4432	1.20895	0	0.316991	1.55742	0.356194	2.2306		4.18367	26.9568	3.77253	0	0.989174	1.95787	0.412075	3.35912				2.79486	0.56426
Subsolidus	4.8	22.8	2.72136	0	0.713553	1.65596	0.472781	2.8423		4.48561	20.1538	1.46847	0	0.385039	1.46377	0.441815	2.29062		5.11439	25.4462	3.97425	0	1.04207	1.84816	0.503747	3.39397				2.8423	0.551673
Subsolidus	2.1	27.8	2.21399	0	0.580518	2.01911	0.206842	2.80647		1.88197	24.7676	0.845768	0	0.221764	1.79887	0.185367	2.206		2.31803	30.8324	3.58221	0	0.939272	2.23936	0.228317	3.40695				2.80647	0.600472
Subsolidus	1.3	21.7	1.42987	0	0.374918	1.57607	0.128045	2.07903		1.12834	19.1425	0.264233	0	0.069283	1.39032	0.111137	1.57074		1.47166	24.2575	2.5955	0	0.680553	1.76182	0.144952	2.58733				2.07903	0.508293
Subsolidus	3.9	21.8	2.39849	0	0.628894	1.58333	0.384134	2.59636		3.61977	19.2342	1.18988	0	0.311991	1.39698	0.356532	2.0655		4.18023	24.3658	3.6071	0	0.945798	1.76969	0.411736	3.12722				2.59636	0.530861
Subsolidus	2.8	20.5	2.07561	0	0.544235	1.48891	0.275789	2.30894		2.56618	18.0402	0.922765	0	0.241953	1.31026	0.252758	1.80497		3.03382	22.9598	3.22846	0	0.846518	1.66757	0.298819	2.81291				2.30894	0.503972
Subsolidus	4.5	35.1	3.78223	0	0.991718	2.54931	0.443232	3.98426		4.17858	31.548	2.16927	0	0.568794	2.29133	0.411573	3.2717		4.82142	38.652	5.39519	0	1.41464	2.80729	0.474891	4.69682				3.98426	0.712562
Subsolidus	4.9	35	3.87448	0	1.01591	2.54205	0.48263	4.04059		4.5655	31.4548	2.2598	0	0.592531	2.28456	0.449684	3.32677		5.2345	38.5452	5.48916	0	1.43928	2.79954	0.515577	4.7544				4.04059	0.713812
Subsolidus	4.2	20.9	1.98336	0	0.520047	1.51797	0.413683	2.4517		3.90989	18.4073	0.807701	0	0.211783	1.33692	0.385109	1.93381		4.49011	23.3927	3.15903	0	0.828312	1.69901	0.442258	2.96958				2.4517	0.517884
Subsolidus	2.4	22.9	2.07561	0	0.544235	1.66323	0.23639	2.44385		2.17893	20.2461	0.852959	0	0.22365	1.47047	0.214616	1.90874		2.62107	25.5539	3.29827	0	0.864821	1.85598	0.258165	2.97897				2.44385	0.535116
Subsolidus	2.7	19.5	2.39849	0	0.628894	1.41629	0.265939	2.31112		2.47181	17.1227	1.27014	0	0.333037	1.24362	0.243464	1.82012		2.92819	21.8773	3.52683	0	0.924752	1.58895	0.288415	2.80211				2.31112	0.490995
Subsolidus	2.9	22.2	2.02949	0	0.532141	1.61239	0.285638	2.43017		2.65927	19.602	0.824959	0	0.216308	1.4237	0.261928	1.90193		3.14073	24.798	3.23402	0	0.847975	1.80108	0.309349	2.9584				2.43017	0.528233
Subsolidus	3.4	22.2	2.26011	0	0.592612	1.61239	0.334886	2.53988		3.1388	19.602	1.0467	0	0.274451	1.42369	0.309159	2.0073		3.6612	24.798	3.47352	0	0.910773	1.80108	0.360613	3.07247				2.53988	0.532581
Subsolidus	3.4	21.3	2.26011	0	0.592612	1.54702	0.334886	2.47452		3.14014	18.7747	1.07385	0	0.281568	1.36361	0.309292	1.95447		3.65986	23.8253	3.44638	0	0.903656	1.73043	0.360481	2.99457				2.47452	0.520048
Subsolidus	4.3	22.1	2.12174	0	0.55633	1.60512	0.423533	2.58499		4.00455	19.51	0.906228	0	0.237617	1.41701	0.394432	2.04906		4.59545	24.69	3.33725	0	0.875042	1.79324	0.452634	3.12091				2.58499	0.535927
Subsolidus	1.9	22.9	1.47599	0	0.387012	1.66323	0.187142	2.23738		1.70051	20.2461	0.268561	0	0.070418	1.47048	0.167494	1.70839		2.09949	25.5539	2.68342	0	0.703606	1.85598	0.206791	2.76637				2.23738	0.528993
Subsolidus	3.9	28	1.93724	0	0.507953	2.03364	0.384134	2.92573		3.61106	24.9526	0.555091	0	0.145547	1.8123	0.355675	2.31353		4.18894	31.0474	3.31939	0	0.870359	2.25498	0.412594	3.53793				2.92573	0.612202
Subsolidus	3.3	27.9	1.70662	0	0.447483	2.02638	0.325037	2.7989		3.03415	24.8601	0.335893	0	0.0880728	1.80559	0.298852	2.19251		3.56585	30.9399	3.07734	0	0.806892	2.24717	0.351222	3.40528				2.7989	0.606385
Subsolidus	1.7	31.9	2.07561	0	0.544235	2.3169	0.167443	3.02858		1.4894	28.5694	0.595773	0	0.156214	2.07499	0.1467	2.37791		1.9106	35.2306	3.55546	0	0.932257	2.5588	0.188187	3.67924				3.02858	0.650668
Subsolidus	1.4	20.3	0.96862	0	0.253977	1.47439	0.137894	1.86626		1.22766	17.8568	-0.144982	0	-0.0380149	1.29694	0.12092	1.37984		1.57234	22.7432	2.08222	0	0.545968	1.65184	0.154869	2.35268				1.86626	0.486418
Subsolidus	2.1	21.5	1.89112	0	0.495859	1.56155	0.206842	2.26425		1.89438	18.9586	0.717048	0	0.188013	1.37697	0.186589	1.75157		2.30562	24.0414	3.06518	0	0.803705	1.74612	0.227094	2.77692				2.26425	0.512678
Subsolidus	1.7	20.4	1.52212	0	0.399106	1.48165	0.167443	2.0482		1.51406	17.9485	0.392452	0	0.102903	1.3036	0.149128	1.55563		1.88594	22.8515	2.65178	0	0.695309	1.65971	0.185758	2.54077				2.0482	0.492572
Subsolidus	4.3	23.7	2.90586	0	0.76193	1.72133	0.423533	2.90679		4.00201	20.9824	1.627	0	0.426608	1.52395	0.394182	2.34474		4.59799	26.4176	4.18472	0	1.09725	1.91871	0.452884	3.46884				2.90679	0.56205
Subsolidus	3.2	19.7	2.58299	0	0.677271	1.43081	0.315187	2.42327		2.95045	17.3061	1.44002	0	0.377581	1.25694	0.290607	1.92513		3.44955	22.0939	3.72595	0	0.976961	1.60468	0.339767	2.92141				2.42327	0.498141
Subsolidus	3.9	22.4	2.49074	0	0.653083	1.62691	0.384134	2.66413		3.61888	19.7859	1.26228	0	0.330976	1.43705	0.356445	2.12447		4.18112	25.0141	3.71919	0	0.975189	1.81678	0.411824	3.20379				2.66413	0.539659
Subsolidus	4.9	22.9	2.81361	0	0.737741	1.66323	0.48263	2.8836		4.58203	20.2458	1.55501	0	0.40773	1.47045	0.451312	2.3295		5.21797	25.5542	4.07221	0	1.06775	1.856	0.513949	3.4377				2.8836	0.554103
Subsolidus	3.9	24.9	2.53686	0	0.665177	1.80849	0.384134	2.8578		3.61529	22.0885	1.23362	0	0.32346	1.60429	0.356092	2.28384		4.18471	27.7115	3.84011	0	1.00689	2.01268	0.412177	3.43175				2.8578	0.573955
Subsolidus	3.1	21.8	2.21399	0	0.580518	1.58333	0.305338	2.46919		2.85157	19.2343	1.01615	0	0.266439	1.39698	0.280868	1.94429		3.34843	24.3657	3.41183	0	0.894597	1.76968	0.329807	2.99409				2.46919	0.524899
Subsolidus	4.8	21.3	1.98336	0	0.520047	1.54702	0.472781	2.53985		4.48784	18.7746	0.790156	0	0.207182	1.3636	0.442035	2.01282		5.11216	23.8254	3.17657	0	0.832912	1.73044	0.503527	3.06687				2.53985	0.527027
Subsolidus	3.5	21.1	2.12174	0	0.55633	1.53249	0.344736	2.43356		3.23652	18.591	0.943519	0	0.247395	1.35027	0.318785	1.91645		3.76348	23.609	3.29996	0	0.865264	1.71472	0.370687	2.95067				2.43356	0.517113
Subsolidus	2.4	24.3	1.98336	0	0.520047	1.76491	0.23639	2.52135		2.17646	21.5355	0.720393	0	0.18889	1.56412	0.214373	1.96739		2.62354	27.0645	3.24634	0	0.851204	1.9657	0.258408	3.07531				2.52135	0.553962
Subsolidus	1.4	21	2.30624	0	0.604706	1.52523	0.137894	2.26783		1.22493	18.4993	1.14375	0	0.299895	1.34361	0.120651	1.76415		1.57507	23.5007	3.46873	0	0.909517	1.70685	0.155138	2.77151				2.26783	0.503678
Subsolidus	3.8	23.3	2.76749	0	0.725647	1.69228	0.374285	2.79221		3.52127	20.6141	1.50748	0	0.395268	1.4972	0.346831	2.2393		4.07873	25.9859	4.02749	0	1.05603	1.88735	0.401738	3.34512				2.79221	0.552909
Subsolidus	2.8	24.3	1.79887	0	0.471671	1.76491	0.275789	2.51237		2.56005	21.5355	0.536328	0	0.140628	1.56412	0.252155	1.9569		3.03995	27.0645	3.0614	0	0.802714	1.9657	0.299423	3.06783				2.51237	0.555466
Subsolidus	3.5	23.6	2.30624	0	0.604706	1.71407	0.344736	2.66351		3.23271	20.8904	1.04919	0	0.275102	1.51727	0.318409	2.11078		3.76729	26.3096	3.56329	0	0.93431	1.91086	0.371063	3.21624				2.66351	0.552727
Subsolidus	3.2	23.1	2.02949	0	0.532141	1.67775	0.315187	2.52508		2.94558	20.4301	0.79532	0	0.208537	1.48384	0.290128	1.9825		3.45442	25.7699	3.26366	0	0.855746	1.87167	0.340246	3.06766				2.52508	0.54258
Subsolidus	2.95	23.84	1.39297	0	0.365242	1.7315	0.290563	2.3873		2.70494	21.1116	0.150514	0	0.0394656	1.53333	0.266426	1.83923		3.19506	26.5684	2.63542	0	0.691019	1.92966	0.314701	2.93538				2.3873	0.548079
Subsolidus	3	21.1	1.84499	0	0.483765	1.53249	0.295488	2.31175		2.75702	18.5911	0.676816	0	0.177464	1.35027	0.271555	1.79929		3.24298	23.6089	3.01316	0	0.790066	1.71472	0.319421	2.8242				2.31175	0.512456
Subsolidus	4.5	21.5	3.13648	0	0.8224	1.56155	0.443232	2.82718		4.19758	18.9584	1.91565	0	0.502293	1.37695	0.413445	2.29268		4.80242	24.0416	4.35731	0	1.14251	1.74614	0.473019	3.36167				2.82718	0.534493
Subsolidus	3.12	22.33	1.86805	0	0.489812	1.62183	0.307308	2.41895		2.87013	19.7216	0.660945	0	0.173303	1.43238	0.282697	1.88838		3.36987	24.9384	3.07516	0	0.806321	1.81128	0.331918	2.94952				2.41895	0.530568
Subsolidus	2.66	23.17	0.880983	0	0.230998	1.68284	0.261999	2.17583		2.42839	20.4946	-0.329689	0	-0.086446	1.48852	0.239186	1.64127		2.89161	25.8454	2.09166	0	0.548441	1.87715	0.284812	2.7104				2.17583	0.534569
Subsolidus	4	20.2	2.76749	0	0.725647	1.46713	0.393984	2.58676		3.71793	17.7647	1.59803	0	0.41901	1.29025	0.366201	2.07546		4.28207	22.6353	3.93694	0	1.03228	1.644	0.421767	3.09805				2.58676	0.511298
Subsolidus	5.2	27	2.44461	0	0.640988	1.96101	0.512179	3.11418		4.86713	24.0275	1.0719	0	0.281058	1.74512	0.479393	2.50557		5.53287	29.9725	3.81732	0	1.00092	2.1769	0.544966	3.72279				3.11418	0.608608
Subsolidus	4.9	27	3.41323	0	0.894965	1.96101	0.48263	3.33861		4.5765	24.0275	2.02431	0	0.530783	1.74512	0.450767	2.72667		5.2235	29.9725	4.80216	0	1.25915	2.1769	0.514494	3.95054				3.33861	0.611939
Subsolidus	3	22.5	1.61437	0	0.423294	1.63417	0.295488	2.35296		2.75493	19.878	0.408014	0	0.106983	1.44374	0.27135	1.82207		3.24507	25.122	2.82072	0	0.739606	1.82461	0.319626	2.88384				2.35296	0.530885
Subsolidus	4.8	22.7	2.49074	0	0.653083	1.6487	0.472781	2.77456		4.48585	20.0618	1.24552	0	0.326582	1.45709	0.441838	2.22551		5.11415	25.3382	3.73595	0	0.979583	1.84031	0.503723	3.32362				2.77456	0.549055
Subsolidus	3.8	22.9	2.39849	0	0.628894	1.66323	0.374285	2.66641		3.52204	20.2459	1.15788	0	0.303602	1.47046	0.346907	2.12097		4.07796	25.5541	3.63909	0	0.954186	1.85599	0.401662	3.21184				2.66641	0.545435
Subsolidus	3.7	22.3	2.35236	0	0.6168	1.61965	0.364435	2.60088		3.42679	19.6939	1.13148	0	0.296679	1.43037	0.337525	2.06457		3.97321	24.9061	3.57325	0	0.936922	1.80893	0.391345	3.13719				2.60088	0.53631
Subsolidus	4.2	23.6	2.39849	0	0.628894	1.71407	0.413683	2.75665		3.90605	20.8904	1.13369	0	0.297258	1.51727	0.38473	2.19926		4.49395	26.3096	3.66329	0	0.960531	1.91087	0.442636	3.31404				2.75665	0.55739
Subsolidus	2.7	28.9	1.75274	0	0.459577	2.09901	0.265939	2.82452		2.45609	25.7859	0.356787	0	0.0935511	1.87283	0.241915	2.2083		2.94391	32.0141	3.1487	0	0.825602	2.32518	0.289963	3.44075				2.82452	0.616225
Subsolidus	4.8	25.1	2.90586	0	0.76193	1.82301	0.472781	3.05772		4.48258	22.2729	1.58212	0	0.41484	1.61768	0.441516	2.47404		5.11742	27.9271	4.2296	0	1.10902	2.02834	0.504046	3.64141				3.05772	0.583683
Subsolidus	3.5	20.1	2.58299	0	0.677271	1.45986	0.344736	2.48187		3.2377	17.673	1.4252	0	0.373693	1.28359	0.3189	1.97618		3.7623	22.527	3.74078	0	0.980848	1.63614	0.370572	2.98756				2.48187	0.505688
Subsolidus	3.3	20.4	2.58299	0	0.677271	1.48165	0.325037	2.48396		3.04532	17.9483	1.41792	0	0.371785	1.30358	0.299952	1.97532		3.55468	22.8517	3.74805	0	0.982756	1.65972	0.350122	2.9926				2.48396	0.508638
Subsolidus	4.9	25	2.76749	0	0.725647	1.81575	0.48263	3.02403		4.57939	22.1807	1.44857	0	0.379822	1.61098	0.451052	2.44186		5.22061	27.8193	4.0864	0	1.07147	2.02052	0.514209	3.6062				3.02403	0.58217
Subsolidus	4.4	24	2.44461	0	0.640988	1.74312	0.433382	2.81749		4.09822	21.2588	1.16541	0	0.305575	1.54403	0.403659	2.25326		4.70178	26.7412	3.72382	0	0.976401	1.94221	0.463106	3.38172				2.81749	0.564228
Subsolidus	4	20.6	2.26011	0	0.592612	1.49618	0.393984	2.48277		3.71767	18.1318	1.08961	0	0.285702	1.31692	0.366175	1.96879		4.28233	23.0682	3.43061	0	0.899522	1.67544	0.421793	2.99676				2.48277	0.513981
Subsolidus	4.2	22.7	2.07561	0	0.544235	1.6487	0.413683	2.60662		3.90744	20.0619	0.843944	0	0.221286	1.45709	0.384867	2.06325		4.49256	25.3381	3.30729	0	0.867185	1.84031	0.442499	3.14999				2.60662	0.543373
Subsolidus	4.4	25	2.85974	0	0.749836	1.81575	0.433382	2.99897		4.09667	22.1807	1.54309	0	0.404606	1.61099	0.403505	2.4191		4.70333	27.8193	4.17638	0	1.09507	2.02051	0.463259	3.57884				2.99897	0.579871
Subsolidus	4.7	25.2	2.49074	0	0.653083	1.83028	0.462931	2.94629		4.38606	22.3652	1.17305	0	0.307578	1.62439	0.43201	2.36397		5.01394	28.0348	3.80843	0	0.998587	2.03617	0.493853	3.52861				2.94629	0.582315
Subsolidus	4.1	20.2	2.58299	0	0.677271	1.46713	0.403834	2.54823		3.81424	17.7647	1.41668	0	0.37146	1.29025	0.375687	2.0374		4.38576	22.6353	3.74929	0	0.983081	1.644	0.43198	3.05906				2.54823	0.510834
Subsolidus	3	21.5	1.98336	0	0.520047	1.56155	0.295488	2.37708		2.7563	18.9586	0.800182	0	0.209811	1.37696	0.271484	1.85826		3.2437	24.0414	3.16655	0	0.830283	1.74613	0.319492	2.8959				2.37708	0.518825
Subsolidus	5.4	24.3	2.21399	0	0.580518	1.76491	0.531878	2.87731		5.06424	21.5352	0.922092	0	0.241777	1.5641	0.498807	2.30469		5.73576	27.0648	3.50589	0	0.919259	1.96571	0.564949	3.44992				2.87731	0.572617
Subsolidus	3.5	22.4	1.93724	0	0.507953	1.62691	0.344736	2.4796		3.23472	19.786	0.723409	0	0.189681	1.43705	0.318607	1.94534		3.76528	25.014	3.15107	0	0.826225	1.81677	0.370865	3.01386				2.4796	0.534259
Subsolidus	5	23.5	2.95198	0	0.774024	1.70681	0.49248	2.97331		4.67786	20.7982	1.67211	0	0.438435	1.51057	0.46075	2.40976		5.32214	26.2018	4.23186	0	1.10961	1.90304	0.52421	3.53686				2.97331	0.563552
Subsolidus	4.5	23.3	2.53686	0	0.665177	1.69228	0.443232	2.80069		4.19554	20.6141	1.27558	0	0.334464	1.4972	0.413244	2.24491		4.80446	25.9859	3.79814	0	0.995889	1.88736	0.47322	3.35647				2.80069	0.55578
Subsolidus	4.8	20.9	2.39849	0	0.628894	1.51797	0.472781	2.61964		4.48813	18.4072	1.20873	0	0.316934	1.33692	0.442063	2.09591		5.11187	23.3928	3.58825	0	0.940855	1.69902	0.503499	3.14337				2.61964	0.52373
Subsolidus	5	24.4	3.22873	0	0.846589	1.77217	0.49248	3.11124		4.67661	21.6274	1.91701	0	0.50265	1.5708	0.460627	2.53407		5.32339	27.1726	4.54045	0	1.19053	1.97355	0.524333	3.68841				3.11124	0.577166
Subsolidus	3.4	23.5	1.98336	0	0.520047	1.70681	0.334886	2.56174		3.137	20.7984	0.736429	0	0.193095	1.51058	0.308982	2.01266		3.663	26.2016	3.2303	0	0.846999	1.90303	0.360791	3.11082				2.56174	0.549077
Subsolidus	3.1	22.1	1.52212	0	0.399106	1.60512	0.305338	2.30957		2.85153	19.5101	0.328868	0	0.0862307	1.41702	0.280864	1.78411		3.34847	24.6899	2.71537	0	0.711981	1.79323	0.329811	2.83502				2.30957	0.525452
Subsolidus	4.4	22.6	2.58299	0	0.677271	1.64144	0.433382	2.75209		4.10002	19.9698	1.34232	0	0.351964	1.45041	0.403835	2.20621		4.69998	25.2302	3.82365	0	1.00258	1.83247	0.462929	3.29798				2.75209	0.545884
Subsolidus	4.1	22.4	2.35236	0	0.6168	1.62691	0.403834	2.64755		3.81141	19.7859	1.12499	0	0.294978	1.43705	0.375409	2.10744		4.38859	25.0141	3.57973	0	0.938622	1.81678	0.432258	3.18766				2.64755	0.540111
Subsolidus	2.7	22.1	2.21399	0	0.580518	1.60512	0.265939	2.45158		2.46764	19.5101	1.01039	0	0.264928	1.41702	0.243053	1.925		2.93236	24.6899	3.41759	0	0.896107	1.79323	0.288826	2.97816				2.45158	0.526581
Subsolidus	5.3	23.9	2.58299	0	0.677271	1.73586	0.522029	2.93516		4.96773	21.1666	1.29643	0	0.339929	1.53733	0.489302	2.36656		5.63227	26.6334	3.86955	0	1.01461	1.93438	0.554756	3.50375				2.93516	0.568594
Suprasolidus	3.4	25.1	2.44461	0	0.640988	1.82301	0.334886	2.79889		3.13426	22.2731	1.14136	0	0.299269	1.61769	0.308712	2.22567		3.66574	27.9269	3.74787	0	0.982708	2.02833	0.361061	3.3721				2.79889	0.573214
Suprasolidus	4.1	39.9	5.2121	0	1.36664	2.89794	0.403834	4.66841		3.78459	36.0356	3.45563	0	0.906081	2.61726	0.372767	3.89611		4.41541	43.7644	6.96857	0	1.82719	3.17861	0.4349	5.4407				4.66841	0.772294
Suprasolidus	4.2	37.2	3.22873	0	0.846589	2.70184	0.413683	3.96211		3.88596	33.5086	1.57313	0	0.412481	2.43373	0.382752	3.22896		4.51404	40.8914	4.88434	0	1.2807	2.96995	0.444614	4.69526				3.96211	0.733148
Suprasolidus	3.9	25.3	3.04423	0	0.798212	1.83754	0.384134	3.01989		3.61445	22.4575	1.71927	0	0.450801	1.63109	0.356009	2.4379		4.18555	28.1425	4.3692	0	1.14562	2.04399	0.41226	3.60187				3.01989	0.581985
Suprasolidus	2.8	22.9	2.44461	0	0.640988	1.66323	0.275789	2.58		2.56199	20.246	1.21141	0	0.317637	1.47047	0.252346	2.04045		3.03801	25.554	3.67782	0	0.96434	1.85599	0.299232	3.11956				2.58	0.539554
Suprasolidus	2.6	23	2.53686	0	0.665177	1.67049	0.25609	2.59176		2.37007	20.3381	1.30035	0	0.340957	1.47715	0.233442	2.05155		2.82993	25.6619	3.77338	0	0.989397	1.86383	0.278737	3.13196				2.59176	0.540205
Suprasolidus	3.5	20.9	2.85974	0	0.749836	1.51797	0.344736	2.61254		3.23639	18.4073	1.67175	0	0.438341	1.33692	0.318771	2.09403		3.76361	23.3927	4.04772	0	1.06133	1.69901	0.370701	3.13104				2.61254	0.518504
Suprasolidus	1.8	19.3	2.21399	0	0.580518	1.40176	0.177293	2.15957		1.61132	16.9394	1.10316	0	0.289253	1.23031	0.158709	1.67827		1.98868	21.6606	3.32482	0	0.871783	1.57321	0.195877	2.64087				2.15957	0.481296
Suprasolidus	2.1	17.3	2.67524	0	0.701459	1.2565	0.206842	2.1648		1.90144	15.108	1.61318	0	0.422982	1.09729	0.187284	1.70756		2.29856	19.492	3.73729	0	0.979936	1.41571	0.226399	2.62204				2.1648	0.457242
Suprasolidus	3.5	25.8	3.45936	0	0.907059	1.87385	0.344736	3.12565		3.22873	22.919	2.11468	0	0.554478	1.66461	0.318017	2.5371		3.77127	28.681	4.80404	0	1.25964	2.0831	0.371455	3.71419				3.12565	0.588546
Suprasolidus	2.4	21.2	2.02949	0	0.532141	1.53976	0.23639	2.30829		2.18199	18.683	0.85947	0	0.225357	1.35694	0.214917	1.79722		2.61801	23.717	3.19951	0	0.838926	1.72257	0.257863	2.81936				2.30829	0.511069
Suprasolidus	3.5	23.7	3.32098	0	0.870777	1.72133	0.344736	2.93684		3.232	20.9825	2.04008	0	0.534918	1.52396	0.318339	2.37721		3.768	26.4175	4.60189	0	1.20664	1.9187	0.371133	3.49647				2.93684	0.559629
Suprasolidus	3.1	21.3	2.16786	0	0.568424	1.54702	0.305338	2.42078		2.85238	18.7748	0.986125	0	0.258566	1.36361	0.280948	1.90313		3.34762	23.8252	3.3496	0	0.878281	1.73043	0.329728	2.93843				2.42078	0.517654
Suprasolidus	3.2	21.9	2.72136	0	0.713553	1.5906	0.315187	2.61934		2.94703	19.3261	1.50903	0	0.395675	1.40366	0.290271	2.0896		3.45297	24.4739	3.93369	0	1.03143	1.77754	0.340103	3.14907				2.61934	0.529734
Suprasolidus	3.2	27.6	2.67524	0	0.701459	2.00459	0.315187	3.02123		2.93798	24.5825	1.29661	0	0.339978	1.78543	0.289379	2.41478		3.46202	30.6175	4.05386	0	1.06294	2.22375	0.340995	3.62769				3.02123	0.606452
Suprasolidus	4.1	27.2	2.72136	0	0.713553	1.97554	0.403834	3.09292		3.80447	24.2125	1.34642	0	0.353038	1.75855	0.374725	2.48632		4.39553	30.1875	4.0963	0	1.07407	2.19252	0.432942	3.69953				3.09292	0.606607
Suprasolidus	2.3	25	2.62911	0	0.689365	1.81575	0.226541	2.73166		2.07888	22.1809	1.33353	0	0.349658	1.611	0.204761	2.16542		2.52112	27.8191	3.92469	0	1.02907	2.0205	0.248321	3.29789				2.73166	0.566238
Suprasolidus	2.8	25.2	2.85974	0	0.749836	1.83028	0.275789	2.8559		2.55784	22.3653	1.55003	0	0.406426	1.6244	0.251937	2.28276		3.04216	28.0347	4.16944	0	1.09324	2.03616	0.29964	3.42904				2.8559	0.573141
Suprasolidus	2.9	26.7	2.58299	0	0.677271	1.93922	0.285638	2.90213		2.65142	23.7504	1.23426	0	0.323629	1.72499	0.261154	2.30977		3.14858	29.6496	3.93171	0	1.03091	2.15345	0.310123	3.49449				2.90213	0.592355
Suprasolidus	3.8	26.8	2.67524	0	0.701459	1.94648	0.374285	3.02223		3.51619	23.8427	1.31499	0	0.344797	1.7317	0.34633	2.42283		4.08381	29.7573	4.03548	0	1.05812	2.16127	0.402239	3.62163				3.02223	0.599402
Suprasolidus	3.4	23.3	2.99811	0	0.786118	1.69228	0.334886	2.81328		3.13672	20.6141	1.73664	0	0.455354	1.4972	0.308954	2.26151		3.66328	25.9859	4.25958	0	1.11688	1.88735	0.360819	3.36505				2.81328	0.551771
Suprasolidus	3.1	23.8	2.26011	0	0.592612	1.72859	0.305338	2.62654		2.84837	21.0747	1.00131	0	0.262547	1.53065	0.280553	2.07375		3.35163	26.5253	3.51892	0	0.922677	1.92653	0.330122	3.17933				2.62654	0.55279
Suprasolidus	2.8	22.5	2.62911	0	0.689365	1.63417	0.275789	2.59933		2.56254	19.878	1.40407	0	0.368154	1.44374	0.2524	2.06429		3.03746	25.122	3.85415	0	1.01058	1.82461	0.299178	3.13437				2.59933	0.535039
Suprasolidus	3.5	28.1	2.35236	0	0.6168	2.0409	0.344736	3.00244		3.22575	25.0451	0.963096	0	0.252528	1.81903	0.317723	2.38928		3.77425	31.1549	3.74163	0	0.981072	2.26278	0.371749	3.6156				3.00244	0.613162
Suprasolidus	4.1	26.5	3.22873	0	0.846589	1.9247	0.403834	3.17512		3.80523	23.5655	1.86396	0	0.48874	1.71156	0.3748	2.5751		4.39477	29.4345	4.5935	0	1.20444	2.13783	0.432867	3.77513				3.17512	0.600017
Suprasolidus	2.4	25.2	2.26011	0	0.592612	1.83028	0.23639	2.65928		2.17463	22.3654	0.965094	0	0.253052	1.6244	0.214192	2.09164		2.62537	28.0346	3.55513	0	0.932172	2.03615	0.258589	3.22691				2.65928	0.567635
Suprasolidus	4.3	29.9	2.90586	0	0.76193	2.17164	0.423533	3.3571		3.99333	26.7126	1.44985	0	0.380158	1.94013	0.393327	2.71362		4.60667	33.0874	4.36187	0	1.1437	2.40314	0.453739	4.00058				3.3571	0.643482
Suprasolidus	2.7	21.1	2.58299	0	0.677271	1.53249	0.265939	2.4757		2.46907	18.5911	1.40189	0	0.367581	1.35027	0.243193	1.96104		2.93093	23.6089	3.76409	0	0.98696	1.71472	0.288685	2.99036				2.4757	0.514659
Suprasolidus	4.1	25.8	2.90586	0	0.76193	1.87385	0.403834	3.03962		3.80639	22.919	1.56759	0	0.41103	1.66461	0.374914	2.45055		4.39361	28.681	4.24413	0	1.11283	2.0831	0.432753	3.62868				3.03962	0.589067
Suprasolidus	2.8	18.5	2.35236	0	0.6168	1.34366	0.275789	2.23624		2.56917	16.2063	1.25487	0	0.329031	1.17706	0.253053	1.75915		3.03083	20.7937	3.44986	0	0.904569	1.51025	0.298524	2.71334				2.23624	0.477096
Suprasolidus	3.8	26.9	3.09036	0	0.810306	1.95375	0.374285	3.13834		3.51582	23.9352	1.71925	0	0.450794	1.73841	0.346294	2.5355		4.08418	29.8648	4.46147	0	1.16982	2.16908	0.402275	3.74118				3.13834	0.602839
Suprasolidus	3.8	24.5	2.85974	0	0.749836	1.77944	0.374285	2.90356		3.51949	21.7197	1.56259	0	0.409718	1.5775	0.346655	2.33387		4.08051	27.2803	4.15688	0	1.08995	1.98137	0.401914	3.47324				2.90356	0.569681
Suprasolidus	2.8	20.6	3.09036	0	0.810306	1.49618	0.275789	2.58227		2.56536	18.1319	1.91223	0	0.501396	1.31692	0.252678	2.07099		3.03464	23.0681	4.26849	0	1.11922	1.67544	0.298899	3.09355				2.58227	0.51128
Suprasolidus	4.4	27.5	2.99811	0	0.786118	1.99732	0.433382	3.21683		4.09316	24.4899	1.60703	0	0.421369	1.7787	0.40316	2.60323		4.70684	30.5101	4.38919	0	1.15087	2.21595	0.463605	3.83042				3.21683	0.613596
Suprasolidus	3.6	26	2.81361	0	0.737741	1.88838	0.354586	2.98071		3.32491	23.1037	1.47536	0	0.386846	1.67802	0.327491	2.39236		3.87509	28.8963	4.15186	0	1.08864	2.09874	0.381681	3.56905				2.98071	0.588348
Suprasolidus	3.4	25.5	2.35236	0	0.6168	1.85207	0.334886	2.80375		3.13369	22.6422	1.03915	0	0.272469	1.6445	0.308656	2.22562		3.66631	28.3578	3.66558	0	0.961132	2.05963	0.361117	3.38188				2.80375	0.578127
Suprasolidus	4.5	27.2	3.09036	0	0.810306	1.97554	0.443232	3.22907		4.19002	24.2124	1.70523	0	0.44712	1.75855	0.4127	2.61837		4.80998	30.1876	4.47549	0	1.17349	2.19252	0.473764	3.83978				3.22907	0.610704
Suprasolidus	3.1	23.1	2.44461	0	0.640988	1.67775	0.305338	2.62408		2.84937	20.4301	1.203	0	0.315432	1.48384	0.280652	2.07992		3.35063	25.7699	3.68622	0	0.966545	1.87167	0.330023	3.16824				2.62408	0.544159
Suprasolidus	4.1	28.7	3.27486	0	0.858683	2.08448	0.403834	3.347		3.80203	25.6005	1.84695	0	0.484279	1.85936	0.374484	2.71813		4.39797	31.7995	4.70276	0	1.23309	2.3096	0.433183	3.97587				3.347	0.628869
Suprasolidus	4	28.1	3.82836	0	1.00381	2.0409	0.393984	3.4387		3.70628	25.045	2.40711	0	0.631155	1.81902	0.365054	2.81523		4.29372	31.155	5.2496	0	1.37647	2.26279	0.422914	4.06217				3.4387	0.623471
Suprasolidus	4.6	29.1	3.73611	0	0.979624	2.11353	0.453082	3.54624		4.28366	25.971	2.28438	0	0.598975	1.88627	0.421923	2.90717		4.91634	32.229	5.18783	0	1.36027	2.34079	0.48424	4.18531				3.54624	0.639068
Suprasolidus	4.7	25.4	4.05898	0	1.06428	1.8448	0.462931	3.37202		4.3851	22.5497	2.70351	0	0.708872	1.63778	0.431914	2.77857		5.0149	28.2503	5.41445	0	1.41969	2.05182	0.493948	3.96546				3.37202	0.593445
Suprasolidus	3.7	34.8	3.22873	0	0.846589	2.52752	0.364435	3.73855		3.40728	31.2684	1.63863	0	0.429657	2.27102	0.335604	3.03629		3.99272	38.3316	4.81883	0	1.26352	2.78402	0.393266	4.44081				3.73855	0.702262
Suprasolidus	3.7	38.1	2.76749	0	0.725647	2.7672	0.364435	3.85729		3.40233	34.3502	1.09959	0	0.288317	2.49485	0.335116	3.11829		3.99767	41.8498	4.43538	0	1.16298	3.03955	0.393754	4.59629				3.85729	0.739
Suprasolidus	3.6	32.7	2.99811	0	0.786118	2.375	0.354586	3.5157		3.31437	29.313	1.4687	0	0.385101	2.129	0.326452	2.84056		3.88563	36.087	4.52751	0	1.18713	2.621	0.382719	4.19085				3.5157	0.675149
Suprasolidus	4.1	36.4	3.04423	0	0.798212	2.64373	0.403834	3.84578		3.7907	32.7612	1.41285	0	0.370455	2.37945	0.373369	3.12327		4.4093	40.0388	4.67562	0	1.22597	2.90802	0.434298	4.56828				3.84578	0.722507
Suprasolidus	3.7	36.8	2.95198	0	0.774024	2.67278	0.364435	3.81124		3.40428	33.1348	1.3144	0	0.344642	2.40658	0.335308	3.08653		3.99572	40.4652	4.58957	0	1.20341	2.93898	0.393562	4.53595				3.81124	0.72471
Suprasolidus	3.9	35	4.05898	0	1.06428	2.54205	0.384134	3.99047		3.59941	31.4548	2.44767	0	0.64179	2.28456	0.354527	3.28088		4.20059	38.5452	5.67029	0	1.48678	2.79954	0.413742	4.70005				3.99047	0.709585
Suprasolidus	3.4	35	2.76749	0	0.725647	2.54205	0.334886	3.60258		3.11819	31.4549	1.18183	0	0.309882	2.28457	0.307129	2.90158		3.68181	38.5451	4.35314	0	1.14141	2.79953	0.362644	4.30359				3.60258	0.701003
Suprasolidus	3.6	32.5	2.72136	0	0.713553	2.36048	0.354586	3.42861		3.31483	29.127	1.20215	0	0.315209	2.11549	0.326498	2.7572		3.88517	35.873	4.24057	0	1.1119	2.60546	0.382674	4.10003				3.42861	0.671413
Suprasolidus	3.1	32.6	2.85974	0	0.749836	2.36774	0.305338	3.42291		2.8334	29.22	1.33884	0	0.35105	2.12225	0.279078	2.75238		3.3666	35.98	4.38063	0	1.14862	2.61323	0.331597	4.09344				3.42291	0.670532
Suprasolidus	3.8	42.2	3.13648	0	0.8224	3.06499	0.374285	4.26167		3.49228	38.1941	1.36124	0	0.356922	2.77404	0.343975	3.47494		4.10772	46.2059	4.91173	0	1.28788	3.35593	0.404594	5.04841				4.26167	0.786735
Suprasolidus	3.7	33	3.18261	0	0.834494	2.39679	0.364435	3.59572		3.41013	29.5921	1.6412	0	0.43033	2.14927	0.335884	2.91548		3.98987	36.4079	4.72402	0	1.23866	2.64431	0.392986	4.27595				3.59572	0.680235
Suprasolidus	4.8	46.5	2.90586	0	0.76193	3.37729	0.472781	4.61201		4.45324	42.2436	1.02855	0	0.269691	3.06815	0.438626	3.77647		5.14676	50.7564	4.78317	0	1.25417	3.68644	0.506935	5.44754				4.61201	0.835534
Suprasolidus	5.8	16.1	2.95198	0	0.774024	1.16934	0.571277	2.51464		5.46061	14.0106	1.88352	0	0.493868	1.01759	0.537849	2.04931		6.13939	18.1894	4.02045	0	1.05418	1.32109	0.604705	2.97998				2.51464	0.465335
Suprasolidus	4.7	44.6	2.53686	0	0.665177	3.2393	0.462931	4.36741		4.35914	40.452	0.708517	0	0.185776	2.93803	0.429358	3.55317		5.04086	48.748	4.36521	0	1.14458	3.54057	0.496504	5.18165				4.36741	0.814241
Suprasolidus	4.4	44.9	2.62911	0	0.689365	3.26109	0.433382	4.38383		4.06833	40.7347	0.794331	0	0.208277	2.95856	0.400714	3.56755		4.73167	49.0653	4.46389	0	1.17045	3.56361	0.46605	5.20012				4.38383	0.816282
Suprasolidus	3.1	26.7	1.84499	0	0.483765	1.93922	0.305338	2.72832		2.84389	23.7504	0.508285	0	0.133275	1.72499	0.280112	2.13838		3.35611	29.6496	3.1817	0	0.834255	2.15345	0.330563	3.31827				2.72832	0.589944
Suprasolidus	3.3	21.9	2.02949	0	0.532141	1.5906	0.325037	2.44778		3.0434	19.3262	0.830662	0	0.217803	1.40366	0.299763	1.92123		3.5566	24.4738	3.22832	0	0.846479	1.77753	0.350311	2.97432				2.44778	0.526549
Suprasolidus	4	29.8	2.67524	0	0.701459	2.16437	0.393984	3.25982		3.70432	26.6199	1.22839	0	0.322089	1.9334	0.364861	2.62035		4.29568	32.9801	4.12209	0	1.08083	2.39535	0.423107	3.89928				3.25982	0.639466
Suprasolidus	3.2	24.8	1.84499	0	0.483765	1.80122	0.315187	2.60018		2.943	21.9964	0.563521	0	0.147758	1.5976	0.289874	2.03523		3.457	27.6036	3.12646	0	0.819772	2.00485	0.340501	3.16512				2.60018	0.564945
Suprasolidus	3.5	29.5	2.02949	0	0.532141	2.14259	0.344736	3.01946		3.22371	26.3418	0.606011	0	0.158899	1.91321	0.317523	2.38963		3.77629	32.6582	3.45297	0	0.905384	2.37196	0.371949	3.6493				3.01946	0.629835
Suprasolidus	5.4	31.7	2.95198	0	0.774024	2.30237	0.531878	3.60827		5.05458	28.3833	1.43777	0	0.37699	2.06148	0.497856	2.93632		5.74542	35.0167	4.4662	0	1.17106	2.54327	0.565901	4.28022				3.60827	0.67195
Suprasolidus	3	26.6	1.79887	0	0.471671	1.93196	0.295488	2.69912		2.74807	23.658	0.466659	0	0.12236	1.71828	0.270674	2.11132		3.25193	29.542	3.13107	0	0.820981	2.14563	0.320302	3.28692				2.69912	0.5878
Suprasolidus	2.7	27.9	2.12174	0	0.55633	2.02638	0.265939	2.84865		2.45764	24.8601	0.74821	0	0.196184	1.80559	0.242067	2.24384		2.94236	30.9399	3.49527	0	0.916475	2.24717	0.289811	3.45345				2.84865	0.604806
Suprasolidus	3.2	23.3	2.21399	0	0.580518	1.69228	0.315187	2.58798		2.94516	20.6142	0.970198	0	0.25439	1.49721	0.290086	2.04169		3.45484	25.9858	3.45778	0	0.906645	1.88735	0.340288	3.13428				2.58798	0.546298
Suprasolidus	2.8	29.4	2.72136	0	0.713553	2.13532	0.275789	3.12466		2.55064	26.2491	1.29358	0	0.339181	1.90648	0.251228	2.49688		3.04936	32.5509	4.14915	0	1.08793	2.36417	0.30035	3.75244				3.12466	0.62778
Suprasolidus	3.8	35.7	3.04423	0	0.798212	2.59289	0.374285	3.76539		3.50237	32.1078	1.433	0	0.375739	2.33199	0.344969	3.0527		4.09763	39.2922	4.65547	0	1.22069	2.85379	0.403601	4.47808				3.76539	0.71269
Suprasolidus	4.4	28.8	2.53686	0	0.665177	2.09174	0.433382	3.1903		4.09156	25.6931	1.11755	0	0.293026	1.86609	0.403002	2.56212		4.70844	31.9069	3.95618	0	1.03733	2.3174	0.463763	3.81849				3.1903	0.628183
Suprasolidus	4.1	29.5	2.16786	0	0.568424	2.14259	0.403834	3.11484		3.80141	26.3418	0.73755	0	0.193389	1.9132	0.374423	2.48102		4.39859	32.6582	3.59818	0	0.943458	2.37197	0.433244	3.74867				3.11484	0.633827
Suprasolidus	3.6	32.9	2.21399	0	0.580518	2.38953	0.354586	3.32463		3.31447	29.4991	0.692322	0	0.18153	2.14252	0.326462	2.65051		3.88553	36.3009	3.73566	0	0.979506	2.63654	0.38271	3.99875				3.32463	0.674121
Suprasolidus	2.5	24.7	2.26011	0	0.592612	1.79396	0.24624	2.63281		2.2714	21.9042	0.979183	0	0.256746	1.5909	0.223724	2.07137		2.7286	27.4958	3.54104	0	0.928478	1.99702	0.268756	3.19425				2.63281	0.561439
Suprasolidus	2.8	26.3	1.70662	0	0.447483	1.91017	0.275789	2.63344		2.55668	23.3809	0.38635	0	0.101303	1.69815	0.251823	2.05128		3.04332	29.2191	3.02688	0	0.793662	2.12218	0.299755	3.2156				2.63344	0.582161
Suprasolidus	4.1	33.6	2.30624	0	0.604706	2.44037	0.403834	3.44891		3.79525	30.1505	0.76066	0	0.199449	2.18983	0.373817	2.7631		4.40475	37.0495	3.85182	0	1.00996	2.69091	0.43385	4.13472				3.44891	0.685811
Suprasolidus	2.6	27.5	1.75274	0	0.459577	1.99732	0.25609	2.71299		2.36261	24.4901	0.397974	0	0.10435	1.77871	0.232708	2.11577		2.83739	30.5099	3.10751	0	0.814803	2.21594	0.279471	3.31021				2.71299	0.597219
Suprasolidus	4.3	32.4	2.62911	0	0.689365	2.35321	0.423533	3.46611		3.98984	29.034	1.10925	0	0.29085	2.10874	0.392984	2.79257		4.61016	35.766	4.14898	0	1.08788	2.59769	0.454082	4.13965				3.46611	0.673538
Suprasolidus	3.3	24	1.98336	0	0.520047	1.74312	0.325037	2.5882		3.0402	21.2589	0.722316	0	0.189394	1.54404	0.299447	2.03288		3.5598	26.7411	3.24441	0	0.8507	1.9422	0.350626	3.14353				2.5882	0.555325
Suprasolidus	1.9	21.8	1.61437	0	0.423294	1.58333	0.187142	2.19377		1.70258	19.2344	0.438053	0	0.11486	1.39699	0.167698	1.67955		2.09742	24.3656	2.79068	0	0.731729	1.76967	0.206587	2.70799				2.19377	0.51422
Suprasolidus	2.9	25	1.93724	0	0.507953	1.81575	0.285638	2.60934		2.6547	22.1809	0.650487	0	0.170561	1.611	0.261477	2.04304		3.1453	27.8191	3.22399	0	0.845346	2.0205	0.3098	3.17565				2.60934	0.566306
Suprasolidus	3.2	29.1	2.07561	0	0.544235	2.11353	0.315187	2.97296		2.93586	25.9711	0.664902	0	0.17434	1.88628	0.28917	2.3498		3.46414	32.2289	3.48633	0	0.914131	2.34078	0.341204	3.59612				2.97296	0.62316
Suprasolidus	1.7	21.6	1.75274	0	0.459577	1.56881	0.167443	2.19583		1.51141	19.0506	0.581257	0	0.152408	1.38364	0.148868	1.68492		1.88859	24.1494	2.92422	0	0.766745	1.75397	0.186018	2.70674				2.19583	0.510909
Suprasolidus	2	25.4	2.02949	0	0.532141	1.8448	0.196992	2.57394		1.79094	22.55	0.735667	0	0.192895	1.63781	0.1764	2.0071		2.20906	28.25	3.32331	0	0.871388	2.0518	0.217584	3.14077				2.57394	0.566835
Suprasolidus	3.1	29.6	2.95198	0	0.774024	2.14985	0.305338	3.22921		2.83841	26.4345	1.51227	0	0.396523	1.91994	0.279572	2.59603		3.36159	32.7655	4.3917	0	1.15152	2.37976	0.331103	3.86239				3.22921	0.633177
Suprasolidus	5.3	35.6	2.72136	0	0.713553	2.58563	0.522029	3.82121		4.95261	32.0144	1.10799	0	0.29052	2.32521	0.487812	3.10354		5.64739	39.1856	4.33473	0	1.13659	2.84605	0.556246	4.53888				3.82121	0.71767
Suprasolidus	5.4	34.1	3.18261	0	0.834494	2.47668	0.531878	3.84306		5.05135	30.616	1.60022	0	0.419586	2.22364	0.497538	3.14076		5.74865	37.584	4.76499	0	1.2494	2.72973	0.566219	4.54535				3.84306	0.702292
Suprasolidus	5.2	31.2	3.18261	0	0.834494	2.26606	0.512179	3.61273		4.86135	27.9188	1.67929	0	0.440318	2.02775	0.478823	2.94689		5.53865	34.4812	4.68592	0	1.22867	2.50437	0.545535	4.27857				3.61273	0.665843
Suprasolidus	1.7	25.3	1.70662	0	0.447483	1.83754	0.167443	2.45246		1.50373	22.4577	0.42365	0	0.111083	1.63111	0.148112	1.8903		1.89627	28.1423	2.98958	0	0.783882	2.04397	0.186775	3.01463				2.45246	0.562164
Suprasolidus	5.8	37.5	2.72136	0	0.713553	2.72363	0.571277	4.00846		5.43541	33.7889	1.05594	0	0.276873	2.45409	0.535366	3.26633		6.16459	41.2111	4.38678	0	1.15023	2.99316	0.607188	4.75058				4.00846	0.742127
Suprasolidus	6	35.3	2.49074	0	0.653083	2.56384	0.590976	3.8079		5.63269	31.7345	0.88433	0	0.231875	2.30488	0.554797	3.09155		6.36731	38.8655	4.09714	0	1.07429	2.8228	0.627155	4.52424				3.8079	0.716346
Suprasolidus	6.6	40.7	3.04423	0	0.798212	2.95604	0.650074	4.40433		6.21016	36.7857	1.28984	0	0.338202	2.67174	0.611676	3.62162		6.98984	44.6143	4.79863	0	1.25822	3.24034	0.688471	5.18703				4.40433	0.782703
Suprasolidus	5.4	35.3	2.90586	0	0.76193	2.56384	0.531878	3.85765		5.04989	31.7346	1.29665	0	0.339988	2.30488	0.497394	3.14226		5.75011	38.8654	4.51507	0	1.18387	2.8228	0.566363	4.57303				3.85765	0.715385
Suprasolidus	5.7	34.6	2.76749	0	0.725647	2.513	0.561427	3.80007		5.34197	31.0819	1.1769	0	0.30859	2.25748	0.526162	3.09223		6.05803	38.1181	4.35807	0	1.1427	2.76852	0.596692	4.50792				3.80007	0.707843
Suprasolidus	4.8	34.3	3.22873	0	0.846589	2.49121	0.472781	3.81058		4.46998	30.8024	1.64434	0	0.431154	2.23718	0.440275	3.1086		5.13002	37.7976	4.81313	0	1.26202	2.74524	0.505286	4.51255				3.81058	0.701974
Suprasolidus	4.9	37.2	2.49074	0	0.653083	2.70184	0.48263	3.83755		4.56306	33.5085	0.842285	0	0.220851	2.43373	0.449443	3.10402		5.23694	40.8915	4.13919	0	1.08531	2.96995	0.515818	4.57108				3.83755	0.733529
Suprasolidus	1.9	22.2	1.47599	0	0.387012	1.61239	0.187142	2.18654		1.7019	19.6022	0.29004	0	0.0760499	1.4237	0.167631	1.66738		2.0981	24.7978	2.66194	0	0.697974	1.80107	0.206654	2.7057				2.18654	0.519155
Suprasolidus	2.1	19	1.47599	0	0.387012	1.37997	0.206842	1.97382		1.89933	16.6645	0.388043	0	0.101747	1.21034	0.187076	1.49917		2.30067	21.3355	2.56394	0	0.672277	1.5496	0.226607	2.44848				1.97382	0.474658
Suprasolidus	4	28.9	2.39849	0	0.628894	2.09901	0.393984	3.12189		3.7058	25.7858	0.981856	0	0.257447	1.87282	0.365007	2.49528		4.2942	32.0142	3.81512	0	1.00034	2.32519	0.422961	3.74849				3.12189	0.626609
Suprasolidus	3.2	28.7	2.26011	0	0.592612	2.08448	0.315187	2.99228		2.93641	25.6006	0.857585	0	0.224863	1.85937	0.289225	2.37346		3.46359	31.7994	3.66264	0	0.960361	2.30959	0.34115	3.6111				2.99228	0.61882
Suprasolidus	4	33.1	2.49074	0	0.653083	2.40405	0.393984	3.45112		3.69947	29.6851	0.956337	0	0.250756	2.15603	0.364383	2.77117		4.30053	36.5149	4.02514	0	1.05541	2.65208	0.423585	4.13107				3.45112	0.679951
Suprasolidus	4.5	33	2.44461	0	0.640988	2.39679	0.443232	3.48101		4.18218	29.592	0.910156	0	0.238647	2.14927	0.411928	2.79984		4.81782	36.408	3.97907	0	1.04333	2.64431	0.474536	4.16218				3.48101	0.681166
Suprasolidus	3.4	32.1	2.72136	0	0.713553	2.33142	0.334886	3.37986		3.12294	28.7551	1.21444	0	0.318431	2.08849	0.307597	2.71451		3.67706	35.4449	4.22828	0	1.10868	2.57436	0.362176	4.04521				3.37986	0.665349
Suprasolidus	1.6	29.3	2.72136	0	0.713553	2.12806	0.157594	2.99921		1.39836	26.1565	1.30394	0	0.341899	1.89975	0.137733	2.37938		1.80164	32.4435	4.13878	0	1.08521	2.35637	0.177454	3.61903				2.99921	0.619825
Suprasolidus	5.1	34.5	3.27486	0	0.858683	2.50574	0.50233	3.86675		4.76006	30.9887	1.68238	0	0.441129	2.25071	0.468846	3.16068		5.43994	38.0113	4.86733	0	1.27624	2.76076	0.535813	4.57281				3.86675	0.706063
Suprasolidus	2.7	24.8	2.49074	0	0.653083	1.80122	0.265939	2.72025		2.46284	21.9964	1.20087	0	0.314873	1.5976	0.24258	2.15505		2.93716	27.6036	3.78061	0	0.991293	2.00485	0.289298	3.28544				2.72025	0.565194
Suprasolidus	2.4	22.4	2.12174	0	0.55633	1.62691	0.23639	2.41963		2.1798	19.786	0.913293	0	0.239469	1.43706	0.214701	1.89123		2.6202	25.014	3.33019	0	0.87319	1.81677	0.258079	2.94803				2.41963	0.528402
Suprasolidus	5.2	32.6	2.44461	0	0.640988	2.36774	0.512179	3.52091		4.85981	29.2199	0.916042	0	0.24019	2.12224	0.478672	2.8411		5.54019	35.9801	3.97318	0	1.04179	2.61323	0.545686	4.20071				3.52091	0.679801
Suprasolidus	6.1	37.9	3.09036	0	0.810306	2.75268	0.600826	4.16381		5.72646	34.1629	1.4072	0	0.368973	2.48125	0.564034	3.41426		6.47354	41.6371	4.77352	0	1.25164	3.0241	0.637618	4.91336				4.16381	0.749549
Suprasolidus	5.9	33.9	3.04423	0	0.798212	2.46216	0.581126	3.8415		5.53702	30.4297	1.46618	0	0.38444	2.21011	0.545374	3.13992		6.26298	37.3703	4.62229	0	1.21198	2.7142	0.616879	4.54307				3.8415	0.701572
Suprasolidus	5.6	35	2.44461	0	0.640988	2.54205	0.551578	3.73462		5.24451	31.4548	0.849367	0	0.222708	2.28456	0.516563	3.02383		5.95549	38.5452	4.03986	0	1.05927	2.79954	0.586592	4.4454				3.73462	0.710783
Suprasolidus	2.3	24.4	1.70662	0	0.447483	1.77217	0.226541	2.4462		2.08064	21.6277	0.44656	0	0.11709	1.57082	0.204934	1.89284		2.51936	27.1723	2.96667	0	0.777875	1.97353	0.248147	2.99955				2.4462	0.553353
Suprasolidus	2.9	23.8	2.39849	0	0.628894	1.72859	0.285638	2.64313		2.65641	21.0747	1.13854	0	0.298531	1.53065	0.261646	2.09083		3.14359	26.5253	3.65843	0	0.959258	1.92653	0.309631	3.19542				2.64313	0.552295
Suprasolidus	4.5	33	2.49074	0	0.653083	2.39679	0.443232	3.4931		4.18216	29.592	0.955521	0	0.250542	2.14927	0.411926	2.81174		4.81784	36.408	4.02595	0	1.05562	2.64431	0.474538	4.17447				3.4931	0.681367
Suprasolidus	3	30.6	2.30624	0	0.604706	2.22248	0.295488	3.12267		2.74097	27.362	0.850672	0	0.22305	1.9873	0.269975	2.48033		3.25903	33.838	3.7618	0	0.986362	2.45765	0.321001	3.76501				3.12267	0.642343
Suprasolidus	7.1	41.7	3.18261	0	0.834494	3.02867	0.699322	4.56249		6.69723	37.7243	1.39948	0	0.366951	2.73991	0.65965	3.76652		7.50277	45.6757	4.96573	0	1.30204	3.31743	0.738993	5.35846				4.56249	0.795972
Suprasolidus	3.8	30.6	2.16786	0	0.568424	2.22248	0.374285	3.16519		3.5107	27.362	0.708928	0	0.185884	1.9873	0.34579	2.51898		4.0893	33.838	3.6268	0	0.950963	2.45765	0.40278	3.8114				3.16519	0.646211
Suprasolidus	2.4	24.1	1.61437	0	0.423294	1.75038	0.23639	2.41007		2.17708	21.3512	0.364303	0	0.095522	1.55074	0.214434	1.86069		2.62292	26.8488	2.86443	0	0.751067	1.95003	0.258347	2.95944				2.41007	0.549375
Suprasolidus	2.6	25.6	2.44461	0	0.640988	1.85933	0.25609	2.75641		2.36556	22.7345	1.13282	0	0.297031	1.65121	0.232999	2.18124		2.83444	28.4655	3.7564	0	0.984946	2.06745	0.279181	3.33158				2.75641	0.575169
Suprasolidus	4.4	35.4	2.62911	0	0.689365	2.5711	0.433382	3.69385		4.08204	31.8279	1.02847	0	0.269671	2.31166	0.402065	2.9834		4.71796	38.9721	4.22975	0	1.10906	2.83054	0.4647	4.4043				3.69385	0.710454
Suprasolidus	1.7	26.1	2.35236	0	0.6168	1.89564	0.167443	2.67989		1.50154	23.1962	1.03371	0	0.271042	1.68474	0.147895	2.10368		1.89846	29.0038	3.67102	0	0.962558	2.10655	0.186991	3.2561				2.67989	0.576209
Suprasolidus	2.8	28.8	2.44461	0	0.640988	2.09174	0.275789	3.00852		2.55186	25.6932	1.03882	0	0.272384	1.8661	0.251348	2.38983		3.04814	31.9068	3.8504	0	1.00959	2.31739	0.30023	3.62721				3.00852	0.618689
Suprasolidus	3.7	29.1	2.49074	0	0.653083	2.11353	0.364435	3.13105		3.41654	25.9711	1.06907	0	0.280316	1.88628	0.336516	2.50311		3.98346	32.2289	3.9124	0	1.02585	2.34079	0.392354	3.75899				3.13105	0.627938
Suprasolidus	4.7	28.5	2.21399	0	0.580518	2.06996	0.462931	3.1134		4.38177	25.4153	0.806576	0	0.211488	1.84591	0.431587	2.48899		5.01823	31.5847	3.6214	0	0.949548	2.294	0.494275	3.73782				3.1134	0.624415
Suprasolidus	4.5	27.4	3.13648	0	0.8224	1.99006	0.443232	3.25569		4.18972	24.3974	1.74479	0	0.457492	1.77198	0.412671	2.64215		4.81028	30.4026	4.52818	0	1.18731	2.20814	0.473793	3.86924				3.25569	0.613549
Suprasolidus	2.8	22.5	2.21399	0	0.580518	1.63417	0.275789	2.49048		2.56281	19.878	0.997496	0	0.261548	1.44374	0.252426	1.95771		3.03719	25.122	3.43048	0	0.899488	1.82461	0.299152	3.02325				2.49048	0.53277
Suprasolidus	3.5	25.4	2.58299	0	0.677271	1.8448	0.344736	2.86681		3.22982	22.5499	1.26747	0	0.332335	1.6378	0.318124	2.28826		3.77018	28.2501	3.89851	0	1.02221	2.05181	0.371348	3.44536				2.86681	0.578553
Suprasolidus	6.3	36.7	3.18261	0	0.834494	2.66552	0.620525	4.12054		5.9226	33.0413	1.52713	0	0.40042	2.39979	0.583352	3.38356		6.6774	40.3587	4.83809	0	1.26857	2.93125	0.657697	4.85752				4.12054	0.736981
Suprasolidus	6.5	40.3	3.13648	0	0.8224	2.92699	0.640224	4.38961		6.11309	36.4105	1.39093	0	0.364708	2.6445	0.602115	3.61132		6.88691	44.1895	4.88204	0	1.28009	3.20948	0.678333	5.16791				4.38961	0.778293
Suprasolidus	3.49	26.79	1.79425	0	0.470461	1.94576	0.343751	2.75997		3.2185	23.8336	0.452802	0	0.118727	1.73103	0.317009	2.16677		3.7615	29.7464	3.1357	0	0.822196	2.16048	0.370493	3.35317				2.75997	0.593202
Suprasolidus	4.04	30.97	1.57747	0	0.413619	2.24935	0.397924	3.06089		3.7417	27.7054	0.11602	0	0.030421	2.01225	0.368542	2.41121		4.3383	34.2346	3.03891	0	0.796817	2.48646	0.427305	3.71058				3.06089	0.649684
Suprasolidus	4.44	28.3	2.04794	0	0.536979	2.05543	0.437322	3.02973		4.1311	25.2302	0.651105	0	0.170723	1.83247	0.406897	2.41009		4.7489	31.3698	3.44477	0	0.903235	2.27839	0.467748	3.64937				3.02973	0.619643
Suprasolidus	4.62	29.77	1.5544	0	0.407572	2.1622	0.455052	3.02482		4.30307	26.5921	0.122694	0	0.032171	1.93138	0.423835	2.38739		4.93693	32.9479	2.98611	0	0.782973	2.39301	0.486268	3.66225				3.02482	0.637431
Suprasolidus	4.51	30.98	1.87728	0	0.492231	2.25008	0.444217	3.18653		4.19498	27.7147	0.407322	0	0.106802	2.01292	0.413189	2.53291		4.82502	34.2453	3.34723	0	0.87766	2.48724	0.475245	3.84014				3.18653	0.653618
Suprasolidus	5.38	32.84	2.16325	0	0.567214	2.38517	0.529908	3.48229		5.03405	29.4431	0.631509	0	0.165584	2.13846	0.495833	2.79987		5.72595	36.2369	3.69499	0	0.968844	2.63188	0.563984	4.16471				3.48229	0.682419
Suprasolidus	4.29	29.12	1.70662	0	0.447483	2.11499	0.422548	2.98502		3.9854	25.9896	0.293357	0	0.0769196	1.88763	0.392546	2.35709		4.5946	32.2504	3.11988	0	0.818045	2.34234	0.45255	3.61294				2.98502	0.627924
Suprasolidus	4.15	26.76	0.885595	0	0.232207	1.94358	0.408758	2.58454		3.85424	23.8058	-0.445098	0	-0.116707	1.72902	0.379628	1.99194		4.44576	29.7142	2.21629	0	0.581121	2.15814	0.437889	3.17715				2.58454	0.592605
Suprasolidus	4.44	23.88	1.94185	0	0.509163	1.7344	0.437322	2.68089		4.13721	21.1483	0.675547	0	0.177131	1.536	0.407499	2.12063		4.74279	26.6117	3.20816	0	0.841194	1.93281	0.467146	3.24115				2.68089	0.560258
Suprasolidus	3.13	26.64	1.41142	0	0.37008	1.93486	0.308292	2.61324		2.87306	23.695	0.0837426	0	0.0219577	1.72097	0.282985	2.02591		3.38694	29.585	2.73909	0	0.718203	2.14876	0.3336	3.20056				2.61324	0.587325
Suprasolidus	2.25	25.04	1.82193	0	0.477718	1.81866	0.221616	2.51799		2.03143	22.2178	0.540944	0	0.141838	1.61368	0.200088	1.95561		2.46857	27.8622	3.10291	0	0.813598	2.02363	0.243144	3.08037				2.51799	0.562381
Suprasolidus	2.77	25.13	1.57285	0	0.41241	1.82519	0.272834	2.51044		2.53	22.3008	0.289865	0	0.0760039	1.61971	0.249195	1.94491		3.01	27.9592	2.85584	0	0.748815	2.03067	0.296473	3.07596				2.51044	0.565526
Suprasolidus	2.49	24.72	1.34684	0	0.353148	1.79541	0.245255	2.39382		2.2624	21.9227	0.0822589	0	0.0215687	1.59225	0.222838	1.83665		2.7176	27.5173	2.61143	0	0.684728	1.99858	0.267672	2.95098				2.39382	0.557164
Suprasolidus	2.53	22.81	0.899433	0	0.235835	1.65669	0.249195	2.14172		2.30445	20.1633	-0.299471	0	-0.0785227	1.46446	0.226979	1.61292		2.75555	25.4567	2.09834	0	0.550193	1.84892	0.271411	2.67052				2.14172	0.528804
Suprasolidus	2.75	23.3	1.59592	0	0.418457	1.69228	0.270864	2.3816		2.51394	20.6143	0.367671	0	0.096405	1.49721	0.247613	1.84123		2.98606	25.9857	2.82416	0	0.740508	1.88734	0.294115	2.92197				2.3816	0.540367
Suprasolidus	4.06	25.95	2.2555	0	0.591403	1.88475	0.399894	2.87604		3.76798	23.0575	0.925662	0	0.242713	1.67467	0.371131	2.28851		4.35202	28.8425	3.58534	0	0.940092	2.09483	0.428657	3.46358				2.87604	0.587533
Suprasolidus	3.18	26.26	1.4806	0	0.388221	1.90726	0.313217	2.6087		2.92166	23.3439	0.162555	0	0.0426227	1.69547	0.287772	2.02586		3.43834	29.1761	2.79865	0	0.73382	2.11906	0.338663	3.19154				2.6087	0.582838
Suprasolidus	4.56	43.09	1.32839	0	0.348311	3.12963	0.449142	3.92708		4.2263	39.0308	-0.447646	0	-0.117375	2.83481	0.416274	3.13371		4.8937	47.1492	3.10443	0	0.813996	3.42445	0.48201	4.72045				3.92708	0.793374
Suprasolidus	4.11	28.23	2.02026	0	0.529723	2.05034	0.404819	2.98489		3.81298	25.1654	0.628464	0	0.164786	1.82776	0.375563	2.36811		4.40702	31.2946	3.41207	0	0.894659	2.27293	0.434074	3.60166				2.98489	0.616774
Suprasolidus	3.49	26.79	1.79425	0	0.470461	1.94576	0.343751	2.75997		3.2185	23.8336	0.452802	0	0.118727	1.73103	0.317009	2.16677		3.7615	29.7464	3.1357	0	0.822196	2.16048	0.370493	3.35317				2.75997	0.593202
Suprasolidus	4.04	30.97	1.57747	0	0.413619	2.24935	0.397924	3.06089		3.7417	27.7054	0.11602	0	0.030421	2.01225	0.368542	2.41121		4.3383	34.2346	3.03891	0	0.796817	2.48646	0.427305	3.71058				3.06089	0.649684
Suprasolidus	4.44	28.3	2.04794	0	0.536979	2.05543	0.437322	3.02973		4.1311	25.2302	0.651105	0	0.170723	1.83247	0.406897	2.41009		4.7489	31.3698	3.44477	0	0.903235	2.27839	0.467748	3.64937				3.02973	0.619643
Suprasolidus	4.62	29.77	1.5544	0	0.407572	2.1622	0.455052	3.02482		4.30307	26.5921	0.122694	0	0.032171	1.93138	0.423835	2.38739		4.93693	32.9479	2.98611	0	0.782973	2.39301	0.486268	3.66225				3.02482	0.637431
Suprasolidus	4.51	30.98	1.87728	0	0.492231	2.25008	0.444217	3.18653		4.19498	27.7147	0.407322	0	0.106802	2.01292	0.413189	2.53291		4.82502	34.2453	3.34723	0	0.87766	2.48724	0.475245	3.84014				3.18653	0.653618
Suprasolidus	5.38	32.84	2.16325	0	0.567214	2.38517	0.529908	3.48229		5.03405	29.4431	0.631509	0	0.165584	2.13846	0.495833	2.79987		5.72595	36.2369	3.69499	0	0.968844	2.63188	0.563984	4.16471				3.48229	0.682419
Suprasolidus	4.29	29.12	1.70662	0	0.447483	2.11499	0.422548	2.98502		3.9854	25.9896	0.293357	0	0.0769196	1.88763	0.392546	2.35709		4.5946	32.2504	3.11988	0	0.818045	2.34234	0.45255	3.61294				2.98502	0.627924
Suprasolidus	4.15	26.76	0.885595	0	0.232207	1.94358	0.408758	2.58454		3.85424	23.8058	-0.445098	0	-0.116707	1.72902	0.379628	1.99194		4.44576	29.7142	2.21629	0	0.581121	2.15814	0.437889	3.17715				2.58454	0.592605
Suprasolidus	5.2	23.6	3.09036	0	0.810306	1.71407	0.512179	3.03655		4.87109	20.8903	1.80303	0	0.472763	1.51726	0.479783	2.4698		5.52891	26.3097	4.37769	0	1.14785	1.91088	0.544575	3.6033				3.03655	0.566749
Suprasolidus	3.5	25.4	2.62911	0	0.689365	1.8448	0.344736	2.8789		3.22979	22.5499	1.31269	0	0.344194	1.6378	0.318122	2.30011		3.77021	28.2501	3.94553	0	1.03454	2.05181	0.37135	3.45769				2.8789	0.578791
Suprasolidus	3.2	20.6	2.49074	0	0.653083	1.49618	0.315187	2.46445		2.94915	18.1319	1.32251	0	0.346769	1.31692	0.29048	1.95417		3.45085	23.0681	3.65896	0	0.959396	1.67544	0.339895	2.97473				2.46445	0.51028
Suprasolidus	4.2	22.1	2.26011	0	0.592612	1.60512	0.413683	2.61142		3.90815	19.51	1.0427	0	0.2734	1.41701	0.384937	2.07535		4.49185	24.69	3.47753	0	0.911824	1.79324	0.442429	3.14749				2.61142	0.536071
Suprasolidus	3.8	24	2.02949	0	0.532141	1.74312	0.374285	2.64955		3.52066	21.2589	0.763401	0	0.200167	1.54403	0.346771	2.09097		4.07934	26.7411	3.29558	0	0.864116	1.94221	0.401798	3.20812				2.64955	0.558574
Suprasolidus	4.4	22.9	2.76749	0	0.725647	1.66323	0.433382	2.82226		4.09953	20.2459	1.51414	0	0.397015	1.47046	0.403787	2.27126		4.70047	25.5541	4.02083	0	1.05428	1.856	0.462977	3.37325				2.82226	0.550997
Suprasolidus	2.7	23.2	1.89112	0	0.495859	1.68502	0.265939	2.44681		2.46599	20.5222	0.660681	0	0.173234	1.49053	0.24289	1.90665		2.93401	25.8778	3.12155	0	0.818484	1.87951	0.288988	2.98698				2.44681	0.540164
Suprasolidus	4	21.6	2.95198	0	0.774024	1.56881	0.393984	2.73682		3.71595	19.0503	1.73668	0	0.455364	1.38362	0.366006	2.20499		4.28405	24.1497	4.16729	0	1.09268	1.75399	0.421962	3.26864				2.73682	0.531821
Suprasolidus	4.2	24.9	3.09036	0	0.810306	1.80849	0.413683	3.03248		3.9039	22.0885	1.7736	0	0.465047	1.60429	0.384519	2.45385		4.4961	27.7115	4.40711	0	1.15557	2.01269	0.442847	3.6111				3.03248	0.578623
Suprasolidus	3	21.1	2.44461	0	0.640988	1.53249	0.295488	2.46897		2.75664	18.591	1.26397	0	0.331419	1.35027	0.271518	1.9532		3.24336	23.609	3.62525	0	0.950557	1.71472	0.319458	2.98473				2.46897	0.515765
Suprasolidus	3.2	19.4	2.53686	0	0.665177	1.40902	0.315187	2.38939		2.95092	17.031	1.40405	0	0.368149	1.23696	0.290654	1.89576		3.44908	21.769	3.66967	0	0.962205	1.58108	0.339721	2.88301				2.38939	0.493623
Suprasolidus	2.6	19.2	2.21399	0	0.580518	1.3945	0.25609	2.2311		2.3767	16.8477	1.0998	0	0.288373	1.22365	0.234096	1.74612		2.8233	21.5523	3.32817	0	0.872663	1.56534	0.278083	2.71609				2.2311	0.484985
Suprasolidus	2.7	20.6	2.39849	0	0.628894	1.49618	0.265939	2.39101		2.47002	18.1319	1.23655	0	0.324229	1.31692	0.243287	1.88444		2.92998	23.0681	3.56042	0	0.933559	1.67543	0.288592	2.89758				2.39101	0.506573
Suprasolidus	2.5	23.4	2.02949	0	0.532141	1.69954	0.24624	2.47792		2.27388	20.7063	0.791897	0	0.207639	1.5039	0.223968	1.93551		2.72612	26.0937	3.26708	0	0.856644	1.89518	0.268512	3.02034				2.47792	0.542415
Suprasolidus	1.8	23.2	2.35236	0	0.6168	1.68502	0.177293	2.47911		1.60343	20.5222	1.11941	0	0.293515	1.49053	0.157932	1.94198		1.99657	25.8778	3.58531	0	0.940086	1.8795	0.196654	3.01624				2.47911	0.537133
Suprasolidus	2.5	23.9	2.62911	0	0.689365	1.73586	0.24624	2.67146		2.27259	21.1668	1.36463	0	0.357813	1.53735	0.223841	2.119		2.72741	26.6332	3.89359	0	1.02092	1.93437	0.268639	3.22392				2.67146	0.552461
Suprasolidus	2.7	19.2	2.16786	0	0.568424	1.3945	0.265939	2.22886		2.47245	16.8477	1.05383	0	0.276318	1.22365	0.243527	1.74349		2.92755	21.5523	3.2819	0	0.860529	1.56534	0.288352	2.71422				2.22886	0.485365
Suprasolidus	2.9	21.5	2.26011	0	0.592612	1.56155	0.285638	2.4398		2.66026	18.9586	1.07209	0	0.281107	1.37696	0.262025	1.92009		3.13974	24.0414	3.44814	0	0.904117	1.74613	0.309252	2.9595				2.4398	0.519704
Suprasolidus	2.7	21.7	2.21399	0	0.580518	1.57607	0.265939	2.42253		2.46831	19.1424	1.02251	0	0.268107	1.39031	0.243119	1.90154		2.93169	24.2576	3.40547	0	0.892929	1.76183	0.28876	2.94352				2.42253	0.520992
Suprasolidus	3.1	23.9	2.12174	0	0.55633	1.73586	0.305338	2.59752		2.84829	21.1668	0.862647	0	0.22619	1.53735	0.280545	2.04408		3.35171	26.6332	3.38083	0	0.886469	1.93437	0.33013	3.15097				2.59752	0.553443
Suprasolidus	2.3	18.9	1.56824	0	0.4112	1.37271	0.226541	2.01045		2.09067	16.5728	0.479847	0	0.125818	1.20369	0.205923	1.53543		2.50933	21.2272	2.65664	0	0.696582	1.54173	0.247159	2.48547				2.01045	0.475021
Suprasolidus	4.5	25.5	2.99811	0	0.786118	1.85207	0.443232	3.08141		4.19238	22.642	1.66343	0	0.436159	1.64449	0.412933	2.49358		4.80762	28.358	4.33279	0	1.13608	2.05964	0.473531	3.66925				3.08141	0.587831
Suprasolidus	4.3	21.1	2.90586	0	0.76193	1.53249	0.423533	2.71796		4.00546	18.5909	1.70374	0	0.446728	1.35026	0.394522	2.19151		4.59454	23.6091	4.10798	0	1.07713	1.71473	0.452544	3.2444				2.71796	0.526448
Suprasolidus	3.1	23.9	1.93724	0	0.507953	1.73586	0.305338	2.54915		2.8484	21.1668	0.681686	0	0.178741	1.53735	0.280556	1.99664		3.3516	26.6332	3.19279	0	0.837165	1.93437	0.330119	3.10165				2.54915	0.552503
Suprasolidus	3	23.8	1.52212	0	0.399106	1.72859	0.295488	2.42319		2.75288	21.0747	0.278121	0	0.0729245	1.53066	0.271148	1.87473		3.24712	26.5253	2.76611	0	0.725288	1.92653	0.319828	2.97165				2.42319	0.548458
Suprasolidus	1.7	33.1	2.12174	0	0.55633	2.40405	0.167443	3.12783		1.48681	29.6853	0.608036	0	0.15943	2.15604	0.146444	2.46191		1.91319	36.5147	3.63544	0	0.95323	2.65207	0.188442	3.79374				3.12783	0.665911
Suprasolidus	3.1	26.3	1.79887	0	0.471671	1.91017	0.305338	2.68718		2.84458	23.3809	0.474697	0	0.124468	1.69815	0.28018	2.1028		3.35542	29.2191	3.12303	0	0.818874	2.12219	0.330495	3.27156				2.68718	0.584378
Suprasolidus	2.8	21.5	1.61437	0	0.423294	1.56155	0.275789	2.26063		2.56485	18.9586	0.440231	0	0.115431	1.37696	0.252628	1.74502		3.03515	24.0414	2.7885	0	0.731158	1.74613	0.29895	2.77623				2.26063	0.515607
Suprasolidus	4.2	20.8	2.67524	0	0.701459	1.5107	0.413683	2.62585		3.90966	18.3154	1.488	0	0.390161	1.33025	0.385086	2.1055		4.49034	23.2846	3.86247	0	1.01276	1.69116	0.442281	3.1462				2.62585	0.52035
Suprasolidus	4.1	23.4	2.16786	0	0.568424	1.69954	0.403834	2.6718		3.81014	20.7062	0.914386	0	0.239756	1.50389	0.375283	2.11893		4.38986	26.0938	3.42134	0	0.897091	1.89519	0.432384	3.22467				2.6718	0.552868
Suprasolidus	3.7	23.1	3.18261	0	0.834494	1.67775	0.364435	2.87668		3.42518	20.43	1.92059	0	0.503588	1.48383	0.337367	2.32478		3.97482	25.77	4.44462	0	1.1654	1.87168	0.391503	3.42858				2.87668	0.551898
Suprasolidus	3.5	20.5	2.02949	0	0.532141	1.48891	0.344736	2.36579		3.23744	18.0401	0.871428	0	0.228492	1.31025	0.318875	1.85762		3.76256	22.9599	3.18755	0	0.83579	1.66758	0.370597	2.87396				2.36579	0.508172
Suprasolidus	2.7	21.8	2.12174	0	0.55633	1.58333	0.265939	2.4056		2.46821	19.2343	0.929119	0	0.243619	1.39699	0.243108	1.88371		2.93179	24.3657	3.31436	0	0.86904	1.76968	0.28877	2.92749				2.4056	0.521889
Suprasolidus	2.7	21.3	1.98336	0	0.520047	1.54702	0.265939	2.33301		2.46913	18.7748	0.808799	0	0.212071	1.36362	0.2432	1.81889		2.93087	23.8252	3.15793	0	0.828024	1.73042	0.288679	2.84713				2.33301	0.51412
Suprasolidus	3.6	21.7	1.79887	0	0.471671	1.57607	0.354586	2.40233		3.33188	19.1423	0.608071	0	0.159439	1.39031	0.328177	1.87792		3.86812	24.2577	2.98966	0	0.783902	1.76183	0.380994	2.92673				2.40233	0.524404
Suprasolidus	2.5	23.5	1.70662	0	0.447483	1.70681	0.24624	2.40053		2.27392	20.7984	0.472194	0	0.123811	1.51059	0.223972	1.85837		2.72608	26.2016	2.94104	0	0.771154	1.90302	0.268508	2.94268				2.40053	0.542153
Suprasolidus	2.8	24.4	1.66049	0	0.435388	1.77217	0.275789	2.48335		2.55997	21.6276	0.397514	0	0.10423	1.57082	0.252147	1.92719		3.04003	27.1724	2.92347	0	0.766547	1.97353	0.299431	3.03951				2.48335	0.556157
Suprasolidus	3.8	21.8	2.07561	0	0.544235	1.58333	0.374285	2.50185		3.52378	19.2342	0.874497	0	0.229297	1.39698	0.347079	1.97336		4.07622	24.3658	3.27673	0	0.859174	1.76969	0.401491	3.03035				2.50185	0.528498
Suprasolidus	1.8	19.4	1.42987	0	0.374918	1.40902	0.177293	1.96123		1.61177	17.0312	0.332651	0	0.0872225	1.23697	0.158753	1.48295		1.98823	21.7688	2.52708	0	0.662613	1.58107	0.195832	2.43952				1.96123	0.478283
Suprasolidus	2.2	28.1	2.16786	0	0.568424	2.0409	0.216691	2.82602		1.97738	25.0452	0.791149	0	0.207443	1.81903	0.194764	2.22124		2.42262	31.1548	3.54458	0	0.929405	2.26277	0.238618	3.4308				2.82602	0.604778
Suprasolidus	2.6	21.5	2.07561	0	0.544235	1.56155	0.25609	2.36187		2.37295	18.9586	0.893878	0	0.234379	1.37696	0.233726	1.84507		2.82705	24.0414	3.25735	0	0.854092	1.74613	0.278453	2.87867				2.36187	0.516803
Suprasolidus	2.2	23.8	2.02949	0	0.532141	1.72859	0.216691	2.47743		1.98571	21.0748	0.782089	0	0.205067	1.53066	0.195585	1.93131		2.41429	26.5252	3.27689	0	0.859215	1.92653	0.237798	3.02354				2.47743	0.546115
Suprasolidus	2.4	22	1.93724	0	0.507953	1.59786	0.23639	2.3422		2.18064	19.4182	0.744657	0	0.195253	1.41034	0.214784	1.82038		2.61936	24.5818	3.12982	0	0.820654	1.78538	0.257996	2.86403				2.3422	0.521823
Suprasolidus	2.5	20.4	1.93724	0	0.507953	1.48165	0.24624	2.23585		2.27917	17.9484	0.792879	0	0.207897	1.30359	0.224489	1.73598		2.72083	22.8516	3.0816	0	0.80801	1.65971	0.267991	2.73571				2.23585	0.499867
Suprasolidus	2.3	22.3	1.79887	0	0.471671	1.61965	0.226541	2.31786		2.08444	19.6941	0.600647	0	0.157492	1.43038	0.205309	1.79318		2.51556	24.9059	2.99708	0	0.785849	1.80892	0.247772	2.84254				2.31786	0.524678
Suprasolidus	2.7	23.7	2.30624	0	0.604706	1.72133	0.265939	2.59198		2.46486	20.9826	1.05267	0	0.276016	1.52397	0.242779	2.04276		2.93514	26.4174	3.5598	0	0.933397	1.9187	0.2891	3.14119				2.59198	0.549216
Suprasolidus	2.4	23.4	1.98336	0	0.520047	1.69954	0.23639	2.45598		2.1781	20.7063	0.747427	0	0.195979	1.5039	0.214534	1.91441		2.6219	26.0937	3.2193	0	0.844116	1.89518	0.258247	2.99754				2.45598	0.541565
Suprasolidus	2.7	22.3	2.30624	0	0.604706	1.61965	0.265939	2.49029		2.46724	19.694	1.09471	0	0.287037	1.43038	0.243013	1.96043		2.93276	24.906	3.51777	0	0.922375	1.80892	0.288865	3.02016				2.49029	0.529868
Suprasolidus	4.2	29.8	2.85974	0	0.749836	2.16437	0.413683	3.32789		3.89704	26.6198	1.40809	0	0.369207	1.9334	0.383843	2.68645		4.50296	32.9802	4.31138	0	1.13046	2.39535	0.443524	3.96934				3.32789	0.641444
Suprasolidus	3	22.8	2.21399	0	0.580518	1.65596	0.295488	2.53197		2.75407	20.154	0.986834	0	0.258752	1.46378	0.271265	1.9938		3.24593	25.446	3.44114	0	0.902283	1.84814	0.319711	3.07014				2.53197	0.538169
Suprasolidus	2.7	23.6	1.98336	0	0.520047	1.71407	0.265939	2.50005		2.46524	20.8905	0.739107	0	0.193797	1.51728	0.242817	1.95389		2.93476	26.3095	3.22762	0	0.846297	1.91086	0.289062	3.04622				2.50005	0.546163
Suprasolidus	4.1	22.9	2.81361	0	0.737741	1.66323	0.403834	2.8048		3.81049	20.2459	1.56189	0	0.409535	1.47046	0.375318	2.25531		4.38951	25.5541	4.06533	0	1.06595	1.856	0.432349	3.35429				2.8048	0.54949
Suprasolidus	4	22.4	2.35236	0	0.6168	1.62691	0.393984	2.6377		3.71516	19.7859	1.12587	0	0.295208	1.43705	0.365929	2.09819		4.28484	25.0141	3.57886	0	0.938392	1.81678	0.422039	3.17721				2.6377	0.539511
Suprasolidus	4.4	21	2.35236	0	0.6168	1.52523	0.433382	2.57541		4.10222	18.4991	1.16421	0	0.305262	1.34359	0.404052	2.0529		4.69778	23.5009	3.54051	0	0.928338	1.70687	0.462713	3.09792				2.57541	0.52251
Suprasolidus	3.3	22	1.93724	0	0.507953	1.59786	0.325037	2.43085		3.04331	19.4181	0.737229	0	0.193305	1.41034	0.299754	1.9034		3.55669	24.5819	3.13725	0	0.822601	1.78538	0.35032	2.9583				2.43085	0.527454
Suprasolidus	3.1	27.1	1.89112	0	0.495859	1.96827	0.305338	2.76947		2.8432	24.1201	0.541926	0	0.142095	1.75185	0.280044	2.17399		3.3568	30.0799	3.2403	0	0.849623	2.1847	0.330631	3.36495				2.76947	0.595484
Suprasolidus	2.2	21.9	2.12174	0	0.55633	1.5906	0.216691	2.36362		1.98919	19.3263	0.930006	0	0.243852	1.40367	0.195927	1.84345		2.41081	24.4737	3.31347	0	0.868808	1.77753	0.237455	2.88379				2.36362	0.520173
Suprasolidus	4.6	23.3	2.72136	0	0.713553	1.69228	0.453082	2.85891		4.29192	20.6141	1.45548	0	0.381633	1.4972	0.422737	2.30157		4.90808	25.9859	3.98724	0	1.04547	1.88736	0.483427	3.41626				2.85891	0.557345
Suprasolidus	3.6	22.4	1.98336	0	0.520047	1.62691	0.354586	2.50154		3.33076	19.7859	0.767758	0	0.20131	1.43705	0.328066	1.96643		3.86924	25.0141	3.19897	0	0.838785	1.81677	0.381105	3.03666				2.50154	0.535116
Suprasolidus	2.9	23.9	1.93724	0	0.507953	1.73586	0.285638	2.52945		2.65654	21.1668	0.68329	0	0.179162	1.53735	0.261658	1.97817		3.14346	26.6332	3.19119	0	0.836745	1.93437	0.309619	3.08073				2.52945	0.551281
Suprasolidus	2.8	21.8	2.26011	0	0.592612	1.58333	0.275789	2.45173		2.56393	19.2343	1.06383	0	0.278941	1.39699	0.252537	1.92846		3.03607	24.3657	3.4564	0	0.906283	1.76968	0.29904	2.97501				2.45173	0.523271
Suprasolidus	2.2	25.5	2.21399	0	0.580518	1.85207	0.216691	2.64927		1.98235	22.6423	0.912383	0	0.239231	1.64451	0.195254	2.07899		2.41765	28.3577	3.51559	0	0.921805	2.05962	0.238129	3.21956				2.64927	0.570283
Suprasolidus	2.5	24.1	2.26011	0	0.592612	1.75038	0.24624	2.58923		2.27248	21.3511	0.997039	0	0.261428	1.55073	0.22383	2.03599		2.72752	26.8489	3.52319	0	0.923796	1.95003	0.26865	3.14248				2.58923	0.553244
Suprasolidus	2.5	21.7	1.98336	0	0.520047	1.57607	0.24624	2.34236		2.2769	19.1424	0.798214	0	0.209295	1.39031	0.224265	1.82387		2.7231	24.2576	3.16852	0	0.830799	1.76183	0.268215	2.86084				2.34236	0.518485
Suprasolidus	3.1	21.6	2.02949	0	0.532141	1.56881	0.305338	2.40629		2.852	19.0504	0.841477	0	0.220639	1.38363	0.28091	1.88518		3.348	24.1496	3.2175	0	0.843644	1.75398	0.329765	2.92739				2.40629	0.521104
Suprasolidus	2.6	23.1	1.79887	0	0.471671	1.67775	0.25609	2.40551		2.37039	20.4301	0.574016	0	0.150509	1.48384	0.233474	1.86782		2.82961	25.7699	3.02372	0	0.792832	1.87166	0.278706	2.9432				2.40551	0.537689
Suprasolidus	4.4	22.8	2.58299	0	0.677271	1.65596	0.433382	2.76662		4.09975	20.1538	1.3364	0	0.350411	1.46377	0.403809	2.21799		4.70025	25.4462	3.82957	0	1.00413	1.84815	0.462955	3.31524				2.76662	0.548623
Suprasolidus	2.8	23.6	1.98336	0	0.520047	1.71407	0.275789	2.5099		2.56111	20.8905	0.738321	0	0.193591	1.51728	0.252259	1.96313		3.03889	26.3095	3.22841	0	0.846503	1.91086	0.299318	3.05668				2.5099	0.546777
Suprasolidus	4.1	22.1	2.58299	0	0.677271	1.60512	0.403834	2.68623		3.8117	19.51	1.3598	0	0.356547	1.41701	0.375437	2.14899		4.3883	24.69	3.80617	0	0.997995	1.79324	0.43223	3.22346				2.68623	0.537235
Suprasolidus	5	29.7	2.44461	0	0.640988	2.15711	0.49248	3.29058		4.67007	26.5271	0.99716	0	0.26146	1.92666	0.459983	2.64811		5.32993	32.8729	3.89207	0	1.02052	2.38756	0.524977	3.93305				3.29058	0.642474
Suprasolidus	2.9	26.4	1.75274	0	0.459577	1.91743	0.285638	2.66265		2.65244	23.4733	0.427971	0	0.112216	1.70486	0.261255	2.07833		3.14756	29.3267	3.07751	0	0.806937	2.13	0.310022	3.24696				2.66265	0.584314
Suprasolidus	3.5	24.9	2.26011	0	0.592612	1.80849	0.344736	2.74583		3.23077	22.0886	0.965477	0	0.253152	1.60429	0.318217	2.17566		3.76923	27.7114	3.55475	0	0.932071	2.01268	0.371255	3.31601				2.74583	0.570171
Suprasolidus	2.4	25.8	2.02949	0	0.532141	1.87385	0.23639	2.64239		2.17368	22.9192	0.721065	0	0.189066	1.66462	0.214099	2.06778		2.62632	28.6808	3.33791	0	0.875216	2.08309	0.258682	3.21699				2.64239	0.574602
Suprasolidus	4.7	19.4	2.67524	0	0.701459	1.40902	0.462931	2.57341		4.39331	17.0308	1.52531	0	0.399944	1.23695	0.432723	2.06962		5.00669	21.7692	3.82516	0	1.00297	1.58109	0.493139	3.07721				2.57341	0.503795
Suprasolidus	4.1	22.9	2.16786	0	0.568424	1.66323	0.403834	2.63548		3.81083	20.2459	0.929275	0	0.24366	1.47046	0.375351	2.08947		4.38917	25.5541	3.40645	0	0.893187	1.85599	0.432316	3.1815				2.63548	0.546012
Suprasolidus	4.9	20.8	3.18261	0	0.834494	1.5107	0.48263	2.82783		4.58444	18.3153	1.97783	0	0.518597	1.33024	0.451549	2.30039		5.21556	23.2847	4.38738	0	1.15039	1.69117	0.513711	3.35527				2.82783	0.52744
Suprasolidus	4.9	21.4	2.12174	0	0.55633	1.55428	0.48263	2.59324		4.58422	18.8665	0.921833	0	0.241709	1.37027	0.451527	2.06351		5.21578	23.9335	3.32165	0	0.870951	1.73829	0.513734	3.12297				2.59324	0.529732
Suprasolidus	4.6	20.8	2.62911	0	0.689365	1.5107	0.453082	2.65315		4.29515	18.3154	1.43924	0	0.377375	1.33025	0.423055	2.13068		4.90485	23.2846	3.81899	0	1.00136	1.69116	0.483108	3.17562				2.65315	0.522474
Suprasolidus	2.4	21.8	2.39849	0	0.628894	1.58333	0.23639	2.44862		2.18067	19.2343	1.20253	0	0.315309	1.39699	0.214788	1.92708		2.61933	24.3657	3.59445	0	0.94248	1.76968	0.257993	2.97015				2.44862	0.521535
Suprasolidus	4.6	22.6	2.12174	0	0.55633	1.64144	0.453082	2.65085		4.29312	19.9698	0.888634	0	0.233004	1.45041	0.422855	2.10627		4.90688	25.2302	3.35484	0	0.879655	1.83247	0.483308	3.19543				2.65085	0.544581
Suprasolidus	3.7	20.8	2.49074	0	0.653083	1.5107	0.364435	2.52822		3.42884	18.3155	1.31202	0	0.344017	1.33025	0.337727	2.012		3.97116	23.2845	3.66946	0	0.962148	1.69116	0.391143	3.04445				2.52822	0.516224
Suprasolidus	3	28.4	2.30624	0	0.604706	2.06269	0.295488	2.96289		2.74472	25.3228	0.912915	0	0.23937	1.8392	0.270344	2.34891		3.25528	31.4772	3.69956	0	0.970042	2.28619	0.320632	3.57686				2.96289	0.613974
Suprasolidus	2.5	24.1	2.07561	0	0.544235	1.75038	0.24624	2.54086		2.2726	21.3511	0.81612	0	0.21399	1.55073	0.223842	1.98857		2.7274	26.8489	3.33511	0	0.874481	1.95003	0.268638	3.09315				2.54086	0.552292
Suprasolidus	3.4	23.9	2.26011	0	0.592612	1.73586	0.334886	2.66336		3.13622	21.1668	0.995881	0	0.261125	1.53734	0.308905	2.10737		3.66378	26.6332	3.52435	0	0.924099	1.93437	0.360868	3.21934				2.66336	0.555982
Suprasolidus	4.4	28.1	3.04423	0	0.798212	2.0409	0.433382	3.2725		4.0923	25.045	1.6353	0	0.428783	1.81902	0.403075	2.65088		4.7077	31.155	4.45317	0	1.16764	2.26279	0.46369	3.89412				3.2725	0.62162
Suprasolidus	2.57	24.57	1.59592	0	0.418457	1.78452	0.253135	2.45611		2.33919	21.7844	0.330783	0	0.0867328	1.5822	0.230401	1.89933		2.80081	27.3556	2.86105	0	0.75018	1.98684	0.275869	3.01289				2.45611	0.556777
Suprasolidus	4.18	23.42	1.72968	0	0.45353	1.70099	0.411713	2.56624		3.88738	20.7246	0.483293	0	0.126722	1.50523	0.382892	2.01484		4.47262	26.1154	2.97606	0	0.780338	1.89676	0.440535	3.11763				2.56624	0.551394
Suprasolidus	2.4	23.09	1.07932	0	0.283002	1.67703	0.23639	2.19642		2.1793	20.421	-0.130352	0	-0.0341789	1.48318	0.214652	1.66365		2.6207	25.759	2.28899	0	0.600184	1.87088	0.258129	2.72919				2.19642	0.53277
Suprasolidus	4.6	22.5	2.12174	0	0.55633	1.63417	0.453082	2.64359		4.29325	19.8778	0.891616	0	0.233786	1.44373	0.422868	2.10038		4.90675	25.1222	3.35186	0	0.878874	1.82462	0.483296	3.18679				2.64359	0.543206
Suprasolidus	5.1	27.9	3.04423	0	0.798212	2.02638	0.50233	3.32692		4.76892	24.8599	1.63557	0	0.428855	1.80557	0.46972	2.70415		5.43108	30.9401	4.45289	0	1.16757	2.24718	0.53494	3.94969				3.32692	0.622771
Suprasolidus	4	22.6	3.04423	0	0.798212	1.64144	0.393984	2.83363		3.71453	19.9698	1.79735	0	0.471272	1.45041	0.365866	2.28755		4.28547	25.2302	4.29112	0	1.12515	1.83247	0.422102	3.37972				2.83363	0.546087
Suprasolidus	4.1	23.3	2.90586	0	0.76193	1.69228	0.403834	2.85804		3.80989	20.6141	1.64043	0	0.430129	1.4972	0.375259	2.30259		4.39011	25.9859	4.17129	0	1.09373	1.88736	0.432408	3.41349				2.85804	0.555453
Suprasolidus	4.6	24.8	3.04423	0	0.798212	1.80122	0.453082	3.05252		4.28979	21.9962	1.72803	0	0.453097	1.59759	0.422528	2.47321		4.91021	27.6038	4.36044	0	1.14333	2.00486	0.483636	3.63182				3.05252	0.579307
Suprasolidus	4	25.6	2.62911	0	0.689365	1.85933	0.393984	2.94268		3.7105	22.7344	1.30285	0	0.341613	1.6512	0.36547	2.35828		4.2895	28.4656	3.95537	0	1.03712	2.06746	0.422498	3.52707				2.94268	0.584395
Suprasolidus	3.7	23.7	2.35236	0	0.6168	1.72133	0.364435	2.70257		3.42476	20.9825	1.08976	0	0.285739	1.52396	0.337325	2.14702		3.97524	26.4175	3.61497	0	0.947862	1.9187	0.391546	3.25811				2.70257	0.555543
Suprasolidus	5	22.8	2.67524	0	0.701459	1.65596	0.49248	2.8499		4.67886	20.1538	1.42158	0	0.372744	1.46377	0.460849	2.29736		5.32114	25.4462	3.9289	0	1.03017	1.84816	0.524111	3.40244				2.8499	0.552541
Suprasolidus	4.8	28.6	2.76749	0	0.725647	2.07722	0.472781	3.27565		4.478	25.5079	1.34658	0	0.353079	1.85264	0.441065	2.64678		5.122	31.6921	4.18839	0	1.09822	2.3018	0.504496	3.90451				3.27565	0.628865
Suprasolidus	4.5	21.3	2.62911	0	0.689365	1.54702	0.443232	2.67962		4.19808	18.7746	1.42523	0	0.373701	1.3636	0.413495	2.1508		4.80192	23.8254	3.833	0	1.00503	1.73044	0.472969	3.20843				2.67962	0.528819
Suprasolidus	4	24.6	2.95198	0	0.774024	1.7867	0.393984	2.95471		3.71177	21.8119	1.6484	0	0.432219	1.5842	0.365594	2.38201		4.28823	27.3881	4.25557	0	1.11583	1.9892	0.422374	3.5274				2.95471	0.572697
Suprasolidus	4.1	23.4	3.13648	0	0.8224	1.69954	0.403834	2.92578		3.80964	20.7062	1.86328	0	0.48856	1.50389	0.375234	2.36768		4.39036	26.0938	4.40969	0	1.15624	1.8952	0.432433	3.48387				2.92578	0.558094
Suprasolidus	4.3	23.8	2.90586	0	0.76193	1.72859	0.423533	2.91406		4.00187	21.0746	1.62408	0	0.42584	1.53064	0.394168	2.35065		4.59813	26.5254	4.18764	0	1.09802	1.92654	0.452897	3.47746				2.91406	0.563403
Suprasolidus	4.3	21.8	2.30624	0	0.604706	1.58333	0.423533	2.61157		4.00485	19.2342	1.09597	0	0.287368	1.39698	0.394461	2.07881		4.59515	24.3658	3.51651	0	0.922044	1.76969	0.452604	3.14434				2.61157	0.532767
Suprasolidus	3.8	24.7	2.95198	0	0.774024	1.79396	0.374285	2.94227		3.51914	21.9041	1.64713	0	0.431886	1.59089	0.346622	2.3694		4.08086	27.4959	4.25684	0	1.11616	1.99703	0.401948	3.51514				2.94227	0.572868
Suprasolidus	4.2	19.6	2.72136	0	0.713553	1.42355	0.413683	2.55078		3.91119	17.2143	1.56909	0	0.411424	1.25027	0.385237	2.04693		4.48881	21.9857	3.87363	0	1.01568	1.59682	0.44213	3.05464				2.55078	0.503851
Suprasolidus	4.2	21.6	3.04423	0	0.798212	1.56881	0.413683	2.7807		3.90842	19.0503	1.82514	0	0.47856	1.38362	0.384963	2.24715		4.49158	24.1497	4.26333	0	1.11786	1.75399	0.442403	3.31426				2.7807	0.533557
Suprasolidus	4	21.5	2.53686	0	0.665177	1.56155	0.393984	2.62071		3.7163	18.9584	1.33345	0	0.349636	1.37695	0.366041	2.09263		4.2837	24.0416	3.74028	0	0.980717	1.74614	0.421927	3.14878				2.62071	0.528077
Suprasolidus	5.4	20.8	2.76749	0	0.725647	1.5107	0.531878	2.76823		5.06813	18.3153	1.56744	0	0.410989	1.33024	0.49919	2.24042		5.73187	23.2847	3.96754	0	1.04031	1.69117	0.564567	3.29604				2.76823	0.527809
Suprasolidus	5.5	21.2	3.13648	0	0.8224	1.53976	0.541728	2.90388		5.16435	18.6827	1.9157	0	0.502305	1.35692	0.508668	2.36789		5.83565	23.7173	4.35727	0	1.1425	1.72259	0.574788	3.43988				2.90388	0.535991
Suprasolidus	3.6	19.8	2.26011	0	0.592612	1.43807	0.354586	2.38527		3.33432	17.3978	1.11757	0	0.293031	1.2636	0.328417	1.88505		3.86568	22.2022	3.40266	0	0.892193	1.61255	0.380754	2.88549				2.38527	0.500223
Suprasolidus	3.9	21.2	3.18261	0	0.834494	1.53976	0.384134	2.75838		3.62018	18.6828	1.97495	0	0.517841	1.35693	0.356573	2.23135		4.17982	23.7172	4.39027	0	1.15115	1.72258	0.411696	3.28542				2.75838	0.52704
Suprasolidus	5	24.8	3.36711	0	0.882871	1.80122	0.49248	3.17657		4.67604	21.9962	2.041	0	0.53516	1.59758	0.460571	2.59331		5.32396	27.6038	4.69321	0	1.23058	2.00486	0.524389	3.75984				3.17657	0.583261
Suprasolidus	5	23.5	2.30624	0	0.604706	1.70681	0.49248	2.80399		4.67816	20.7982	1.03938	0	0.272531	1.51057	0.46078	2.24388		5.32184	26.2018	3.57309	0	0.936882	1.90304	0.52418	3.3641				2.80399	0.560106
Suprasolidus	4.2	21.4	3.04423	0	0.798212	1.55428	0.413683	2.76618		3.90868	18.8665	1.83106	0	0.480113	1.37027	0.38499	2.23538		4.49132	23.9335	4.25741	0	1.11631	1.73829	0.442377	3.29698				2.76618	0.5308
Suprasolidus	4.5	23.4	3.27486	0	0.858683	1.69954	0.443232	3.00146		4.19505	20.7061	1.99532	0	0.523183	1.50388	0.413196	2.44026		4.80495	26.0939	4.55439	0	1.19418	1.8952	0.473268	3.56265				3.00146	0.561193
Suprasolidus	4.1	20.1	3.04423	0	0.798212	1.45986	0.403834	2.66191		3.81413	17.6729	1.87062	0	0.490484	1.28358	0.375677	2.14974		4.38587	22.5271	4.21785	0	1.10594	1.63614	0.431991	3.17407				2.66191	0.512165
Suprasolidus	4.5	20.4	3.50548	0	0.919153	1.48165	0.443232	2.84404		4.1988	17.9481	2.3087	0	0.605351	1.30357	0.413565	2.32249		4.8012	22.8519	4.70227	0	1.23296	1.65973	0.472899	3.36559				2.84404	0.521548
Suprasolidus	4.7	23.3	2.95198	0	0.774024	1.69228	0.462931	2.92923		4.38832	20.614	1.68049	0	0.440631	1.4972	0.432232	2.37006		5.01168	25.986	4.22348	0	1.10742	1.88736	0.493631	3.48841				2.92923	0.559174
Suprasolidus	4.6	21.1	3.09036	0	0.810306	1.53249	0.453082	2.79588		4.29455	18.5909	1.88147	0	0.493331	1.35026	0.422996	2.26658		4.90545	23.6091	4.29925	0	1.12728	1.71473	0.483167	3.32518				2.79588	0.529299
Suprasolidus	3.3	19.8	2.07561	0	0.544235	1.43807	0.325037	2.30735		3.04651	17.3978	0.939785	0	0.246416	1.2636	0.300069	1.81009		3.55349	22.2022	3.21144	0	0.842055	1.61254	0.350004	2.8046				2.30735	0.497258
Suprasolidus	5	23.8	2.85974	0	0.749836	1.72859	0.49248	2.97091		4.67753	21.0745	1.57301	0	0.412451	1.53064	0.460718	2.40381		5.32247	26.5255	4.14646	0	1.08722	1.92655	0.524242	3.53801				2.97091	0.5671
Suprasolidus	4	19.4	2.58299	0	0.677271	1.40902	0.393984	2.48028		3.71908	17.0309	1.44173	0	0.378028	1.23696	0.366315	1.9813		4.28092	21.7691	3.72424	0	0.976514	1.58109	0.421653	2.97926				2.48028	0.498979
Suprasolidus	4.5	20.2	2.67524	0	0.701459	1.46713	0.443232	2.61182		4.19945	17.7646	1.50321	0	0.394148	1.29025	0.413629	2.09802		4.80055	22.6354	3.84726	0	1.00877	1.64401	0.472835	3.12561				2.61182	0.513794
Suprasolidus	4.2	21	2.53686	0	0.665177	1.52523	0.413683	2.60409		3.90947	18.4991	1.34662	0	0.35309	1.34359	0.385067	2.08175		4.49053	23.5009	3.7271	0	0.977263	1.70687	0.442299	3.12643				2.60409	0.522343
Suprasolidus	2.8	22.4	2.16786	0	0.568424	1.62691	0.275789	2.47112		2.563	19.786	0.955321	0	0.250489	1.43706	0.252445	1.93999		3.037	25.014	3.38041	0	0.886358	1.81677	0.299132	3.00226				2.47112	0.531133
Suprasolidus	4.4	21.4	2.90586	0	0.76193	1.55428	0.433382	2.74959		4.10142	18.8665	1.69394	0	0.444158	1.37027	0.403974	2.21841		4.69858	23.9335	4.11778	0	1.0797	1.73829	0.462791	3.28078				2.74959	0.531189
Suprasolidus	3.8	21	2.21399	0	0.580518	1.52523	0.374285	2.48003		3.52482	18.4991	1.03419	0	0.271169	1.34359	0.347181	1.96194		4.07518	23.5009	3.39379	0	0.889867	1.70687	0.401388	2.99812				2.48003	0.51809
Suprasolidus	5.1	19.2	2.44461	0	0.640988	1.3945	0.50233	2.53781		4.77991	16.8475	1.30206	0	0.341407	1.22363	0.470802	2.03584		5.42009	21.5525	3.58716	0	0.94057	1.56536	0.533857	3.03979				2.53781	0.501973
Suprasolidus	4.18	26.16	2.04794	0	0.536979	1.9	0.411713	2.84869		3.88339	23.2515	0.714826	0	0.187431	1.68875	0.382499	2.25868		4.47661	29.0685	3.38105	0	0.886528	2.11125	0.440928	3.4387				2.84869	0.59001
Suprasolidus	3.4	26	2.85974	0	0.749836	1.88838	0.334886	2.9731		3.13262	23.1037	1.52215	0	0.399115	1.67802	0.308551	2.38569		3.66738	28.8963	4.19732	0	1.10056	2.09874	0.361222	3.56052				2.9731	0.587413
Suprasolidus	3.3	23.4	2.12174	0	0.55633	1.69954	0.325037	2.58091		3.04105	20.7063	0.875945	0	0.229677	1.5039	0.299531	2.0331		3.55895	26.0937	3.36753	0	0.882983	1.89519	0.350543	3.12871				2.58091	0.547805
Suprasolidus	2.17	22.93	1.19924	0	0.314447	1.66541	0.213736	2.19359		1.95923	20.2737	-0.00594358	0	-0.00155843	1.47248	0.192976	1.6639		2.38077	25.5863	2.40443	0	0.630453	1.85833	0.234497	2.72328				2.19359	0.52969
Suprasolidus	3.93	23.49	1.66972	0	0.437807	1.70608	0.387089	2.53098		3.64665	20.7891	0.424512	0	0.111309	1.50991	0.359181	1.9804		4.21335	26.1909	2.91492	0	0.764306	1.90224	0.414998	3.08155				2.53098	0.550571
Suprasolidus	2.49	24.72	1.34684	0	0.353148	1.79541	0.245255	2.39382		2.2624	21.9227	0.0822589	0	0.0215687	1.59225	0.222838	1.83665		2.7176	27.5173	2.61143	0	0.684728	1.99858	0.267672	2.95098				2.39382	0.557164
Suprasolidus	2.53	22.81	0.899433	0	0.235835	1.65669	0.249195	2.14172		2.30445	20.1633	-0.299471	0	-0.0785227	1.46446	0.226979	1.61292		2.75555	25.4567	2.09834	0	0.550193	1.84892	0.271411	2.67052				2.14172	0.528804
Suprasolidus	3.13	26.64	1.41142	0	0.37008	1.93486	0.308292	2.61324		2.87306	23.695	0.0837426	0	0.0219577	1.72097	0.282985	2.02591		3.38694	29.585	2.73909	0	0.718203	2.14876	0.3336	3.20056				2.61324	0.587325
Suprasolidus	2.25	25.04	1.82193	0	0.477718	1.81866	0.221616	2.51799		2.03143	22.2178	0.540944	0	0.141838	1.61368	0.200088	1.95561		2.46857	27.8622	3.10291	0	0.813598	2.02363	0.243144	3.08037				2.51799	0.562381
Suprasolidus	2.75	23.3	1.59592	0	0.418457	1.69228	0.270864	2.3816		2.51394	20.6143	0.367671	0	0.096405	1.49721	0.247613	1.84123		2.98606	25.9857	2.82416	0	0.740508	1.88734	0.294115	2.92197				2.3816	0.540367
Suprasolidus	2.77	25.13	1.57285	0	0.41241	1.82519	0.272834	2.51044		2.53	22.3008	0.289865	0	0.0760039	1.61971	0.249195	1.94491		3.01	27.9592	2.85584	0	0.748815	2.03067	0.296473	3.07596				2.51044	0.565526
Suprasolidus	4.06	25.95	2.2555	0	0.591403	1.88475	0.399894	2.87604		3.76798	23.0575	0.925662	0	0.242713	1.67467	0.371131	2.28851		4.35202	28.8425	3.58534	0	0.940092	2.09483	0.428657	3.46358				2.87604	0.587533
Suprasolidus	3.18	26.26	1.4806	0	0.388221	1.90726	0.313217	2.6087		2.92166	23.3439	0.162555	0	0.0426227	1.69547	0.287772	2.02586		3.43834	29.1761	2.79865	0	0.73382	2.11906	0.338663	3.19154				2.6087	0.582838
Suprasolidus	1.81	24.18	1.60514	0	0.420875	1.75619	0.178278	2.35535		1.6116	21.4249	0.356993	0	0.0936052	1.55609	0.158736	1.80843		2.0084	26.9351	2.85329	0	0.748146	1.95629	0.197819	2.90226				2.35535	0.546912
Suprasolidus	4.44	23.88	1.94185	0	0.509163	1.7344	0.437322	2.68089		4.13721	21.1483	0.675547	0	0.177131	1.536	0.407499	2.12063		4.74279	26.6117	3.20816	0	0.841194	1.93281	0.467146	3.24115				2.68089	0.560258
Suprasolidus	2.33	22.36	1.42526	0	0.373708	1.62401	0.229496	2.22721		2.11333	19.7493	0.232159	0	0.060873	1.43439	0.208155	1.70342		2.54667	24.9707	2.61835	0	0.686544	1.81362	0.250837	2.751				2.22721	0.523793
Suprasolidus	3.22	21.67	1.6282	0	0.426923	1.57389	0.317157	2.31797		2.96724	19.1148	0.445007	0	0.116683	1.38831	0.292261	1.79725		3.47276	24.2252	2.8114	0	0.737162	1.75948	0.342053	2.83869				2.31797	0.52072
Suprasolidus	4.56	43.09	1.32839	0	0.348311	3.12963	0.449142	3.92708		4.2263	39.0308	-0.447646	0	-0.117375	2.83481	0.416274	3.13371		4.8937	47.1492	3.10443	0	0.813996	3.42445	0.48201	4.72045				3.92708	0.793374
Suprasolidus	4.1	25.5	2.62911	0	0.689365	1.85207	0.403834	2.94526		3.80695	22.6421	1.30494	0	0.342162	1.6445	0.37497	2.36163		4.39305	28.3579	3.95328	0	1.03657	2.05963	0.432698	3.5289				2.94526	0.583637
Suprasolidus	4.2	34.2	2.81361	0	0.737741	2.48395	0.413683	3.63537		3.8906	30.7093	1.243	0	0.325919	2.23041	0.383209	2.93954		4.5094	37.6907	4.38423	0	1.14956	2.73748	0.444158	4.3312				3.63537	0.69583
Suprasolidus	3.7	25.9	1.89112	0	0.495859	1.88112	0.364435	2.74141		3.42175	23.0114	0.57231	0	0.150062	1.67132	0.337028	2.15841		3.97825	28.7886	3.20992	0	0.841656	2.09092	0.391842	3.32441				2.74141	0.583002
Suprasolidus	2.7	21.6	2.16786	0	0.568424	1.56881	0.265939	2.40317		2.46851	19.0505	0.980373	0	0.257058	1.38364	0.243138	1.88383		2.93149	24.1495	3.35535	0	0.879789	1.75398	0.28874	2.92251				2.40317	0.519339
Suprasolidus	3.7	24.3	1.75274	0	0.459577	1.76491	0.364435	2.58892		3.42421	21.5354	0.483751	0	0.126842	1.56412	0.337271	2.02823		3.97579	27.0646	3.02173	0	0.792312	1.9657	0.391599	3.14961				2.58892	0.560692
Suprasolidus	2.1	20.4	1.42987	0	0.374918	1.48165	0.206842	2.06341		1.89679	17.9485	0.299065	0	0.0784162	1.3036	0.186826	1.56884		2.30321	22.8515	2.56067	0	0.671419	1.65971	0.226857	2.55798				2.06341	0.494572
Suprasolidus	3.4	26.4	1.89112	0	0.495859	1.91743	0.334886	2.74818		3.13255	23.4732	0.560047	0	0.146847	1.70486	0.308543	2.16025		3.66745	29.3268	3.22218	0	0.844871	2.13	0.36123	3.33611				2.74818	0.587928
Suprasolidus	3.6	31.1	1.70662	0	0.447483	2.25879	0.354586	3.06086		3.31759	27.8262	0.242708	0	0.0636392	2.02101	0.32677	2.41142		3.88241	34.3738	3.17052	0	0.831326	2.49657	0.382402	3.7103				3.06086	0.649438
Suprasolidus	2.7	25.9	1.75274	0	0.459577	1.88112	0.265939	2.60663		2.4614	23.0115	0.444203	0	0.116472	1.67132	0.242438	2.03023		2.9386	28.7885	3.06128	0	0.802681	2.09091	0.28944	3.18303				2.60663	0.576398
Suprasolidus	4.7	37	2.85974	0	0.749836	2.68731	0.462931	3.90008		4.36964	33.3216	1.21194	0	0.317777	2.42015	0.430392	3.16832		5.03036	40.6784	4.50753	0	1.18189	2.95447	0.49547	4.63183				3.90008	0.731757
Suprasolidus	2.2	23.8	2.12174	0	0.55633	1.72859	0.216691	2.50161		1.98564	21.0748	0.872548	0	0.228786	1.53066	0.195578	1.95502		2.41436	26.5252	3.37093	0	0.883873	1.92653	0.237804	3.04821				2.50161	0.546591
Suprasolidus	4.8	38.4	2.67524	0	0.701459	2.78899	0.472781	3.96323		4.46452	34.6308	0.994107	0	0.260659	2.51523	0.439737	3.21563		5.13548	42.1692	4.35637	0	1.14226	3.06275	0.505825	4.71083				3.96323	0.747601
Suprasolidus	5.6	31.1	3.13648	0	0.8224	2.25879	0.551578	3.63277		5.24923	27.826	1.6339	0	0.428417	2.021	0.517028	2.96644		5.95077	34.374	4.63906	0	1.21638	2.49659	0.586127	4.2991				3.63277	0.666326
Suprasolidus	5.4	37.7	2.39849	0	0.628894	2.73815	0.531878	3.89892		5.04694	33.976	0.735449	0	0.192838	2.46767	0.497103	3.15761		5.75306	41.424	4.06153	0	1.06495	3.00863	0.566654	4.64023				3.89892	0.741309
Suprasolidus	2.8	25.3	1.70662	0	0.447483	1.83754	0.275789	2.56081		2.5584	22.4577	0.415937	0	0.109061	1.6311	0.251992	1.99215		3.0416	28.1423	2.9973	0	0.785904	2.04398	0.299585	3.12947				2.56081	0.568656
Suprasolidus	1.9	20.8	1.29149	0	0.338635	1.5107	0.187142	2.03648		1.7048	18.3157	0.152465	0	0.0399771	1.33027	0.167916	1.53816		2.0952	23.2843	2.43052	0	0.637294	1.69114	0.206369	2.5348				2.03648	0.49832
Suprasolidus	2.4	23.1	1.89112	0	0.495859	1.67775	0.23639	2.41		2.1787	20.4302	0.666028	0	0.174636	1.48384	0.214594	1.87307		2.6213	25.7698	3.1162	0	0.817082	1.87166	0.258187	2.94693				2.41	0.536931
Suprasolidus	3	30.5	1.84499	0	0.483765	2.21522	0.295488	2.99447		2.74142	27.2693	0.399937	0	0.104865	1.98057	0.270019	2.35545		3.25858	33.7307	3.29004	0	0.862665	2.44986	0.320957	3.63349				2.99447	0.639017
Suprasolidus	3.4	32.3	2.53686	0	0.665177	2.34595	0.334886	3.34601		3.12271	28.9411	1.02761	0	0.269445	2.10199	0.307575	2.67901		3.67729	35.6589	4.04611	0	1.06091	2.58991	0.362198	4.01302				3.34601	0.667003
Suprasolidus	5	34.9	2.12174	0	0.55633	2.53479	0.49248	3.5836		4.66319	31.3616	0.538171	0	0.141111	2.27779	0.459306	2.87821		5.33681	38.4384	3.70531	0	0.971548	2.79178	0.525654	4.28898				3.5836	0.705387
Suprasolidus	4.6	31.5	2.81361	0	0.737741	2.28785	0.453082	3.47867		4.28073	28.1975	1.31295	0	0.344262	2.04799	0.421635	2.81388		4.91927	34.8025	4.31427	0	1.13122	2.5277	0.484528	4.14345				3.47867	0.664785
Suprasolidus	2.3	27.6	1.79887	0	0.471671	2.00459	0.226541	2.7028		2.07455	24.5826	0.442462	0	0.116016	1.78543	0.204335	2.10578		2.52545	30.6174	3.15527	0	0.827326	2.22374	0.248747	3.29982				2.7028	0.597016
Suprasolidus	4.5	28.6	2.76749	0	0.725647	2.07722	0.443232	3.2461		4.18824	25.5079	1.34886	0	0.353678	1.85264	0.412524	2.61884		4.81176	31.6921	4.18611	0	1.09762	2.3018	0.47394	3.87335				3.2461	0.627257
Suprasolidus	5.6	36.9	2.72136	0	0.713553	2.68005	0.551578	3.94518		5.24193	33.2282	1.07249	0	0.281212	2.41336	0.516309	3.21088		5.95807	40.5718	4.37023	0	1.14589	2.94673	0.586846	4.67947				3.94518	0.734295
Suprasolidus	7.3	41.8	3.82836	0	1.00381	3.03593	0.719021	4.75877		6.89254	37.8182	2.03181	0	0.53275	2.74673	0.678888	3.95837		7.70746	45.7818	5.6249	0	1.47487	3.32514	0.759154	5.55916				4.75877	0.800397
Suprasolidus	5.3	35.4	3.13648	0	0.8224	2.5711	0.522029	3.91553		4.9527	31.8278	1.52152	0	0.398948	2.31165	0.487821	3.19842		5.6473	38.9722	4.75145	0	1.24585	2.83055	0.556237	4.63264				3.91553	0.717107
Suprasolidus	2	21.9	1.75274	0	0.459577	1.5906	0.196992	2.24717		1.798	19.3263	0.569909	0	0.149433	1.40367	0.177096	1.7302		2.202	24.4737	2.93557	0	0.76972	1.77753	0.216888	2.76413				2.24717	0.516968
Suprasolidus	3.6	30.5	2.76749	0	0.725647	2.21522	0.354586	3.29545		3.31796	27.2692	1.30243	0	0.341502	1.98056	0.326806	2.64887		3.88204	33.7308	4.23254	0	1.10979	2.44987	0.382365	3.94203				3.29545	0.646579
Suprasolidus	5	35.4	3.04423	0	0.798212	2.5711	0.49248	3.86179		4.6621	31.8278	1.43279	0	0.375684	2.31166	0.459198	3.14654		5.3379	38.9722	4.65568	0	1.22074	2.83055	0.525762	4.57705				3.86179	0.715256
Suprasolidus	4.9	31.7	2.49074	0	0.653083	2.30237	0.48263	3.43808		4.57061	28.3833	0.987988	0	0.259055	2.06148	0.450187	2.77072		5.22939	35.0167	3.99349	0	1.04711	2.54326	0.515074	4.10544				3.43808	0.667361
Suprasolidus	4.4	32.9	2.12174	0	0.55633	2.38953	0.433382	3.37924		4.0859	29.499	0.595925	0	0.156254	2.14251	0.402445	2.70121		4.7141	36.301	3.64755	0	0.956405	2.63654	0.46432	4.05726				3.37924	0.678026
Suprasolidus	4.4	35.1	2.39849	0	0.628894	2.54931	0.433382	3.61159		4.08259	31.5481	0.80941	0	0.212231	2.29134	0.402118	2.90569		4.71741	38.6519	3.98757	0	1.04556	2.80729	0.464646	4.31749				3.61159	0.705901
Suprasolidus	2.5	21.7	1.56824	0	0.4112	1.57607	0.24624	2.23351		2.27719	19.1424	0.39133	0	0.102608	1.39031	0.224294	1.71722		2.72281	24.2576	2.74515	0	0.719792	1.76183	0.268186	2.74981				2.23351	0.516294
Suprasolidus	2.1	21.8	1.79887	0	0.471671	1.58333	0.206842	2.26185		1.89389	19.2344	0.617449	0	0.161898	1.39699	0.18654	1.74543		2.30611	24.3656	2.98028	0	0.781444	1.76968	0.227143	2.77826				2.26185	0.516417
Suprasolidus	2.9	27.7	2.21399	0	0.580518	2.01185	0.285638	2.87801		2.64993	24.675	0.843151	0	0.221078	1.79215	0.261008	2.27423		3.15007	30.725	3.58483	0	0.939958	2.23155	0.310269	3.48178				2.87801	0.603774
Suprasolidus	4.7	39.3	2.99811	0	0.786118	2.85436	0.462931	4.10341		4.36634	35.4734	1.29011	0	0.338273	2.57643	0.430067	3.34477		5.03366	43.1266	4.70611	0	1.23396	3.13228	0.495795	4.86204				4.10341	0.758634
Suprasolidus	2.2	28	2.26011	0	0.592612	2.03364	0.216691	2.84294		1.97751	24.9526	0.884635	0	0.231955	1.81231	0.194777	2.23904		2.42249	31.0474	3.63559	0	0.953269	2.25497	0.238606	3.44684				2.84294	0.6039
Suprasolidus	1.6	21.8	2.21399	0	0.580518	1.58333	0.157594	2.32145		1.41486	19.2344	1.02766	0	0.269457	1.39699	0.139358	1.80581		1.78514	24.3656	3.40032	0	0.891579	1.76968	0.175829	2.83708				2.32145	0.515639
Suprasolidus	3.5	33.8	2.49074	0	0.653083	2.45489	0.344736	3.45271		3.21658	30.3367	0.940922	0	0.246714	2.20336	0.31682	2.76689		3.78342	37.2633	4.04055	0	1.05945	2.70643	0.372652	4.13853				3.45271	0.685821
Suprasolidus	4	32.6	2.39849	0	0.628894	2.36774	0.393984	3.39062		3.70027	29.22	0.879167	0	0.230522	2.12225	0.364461	2.71723		4.29973	35.98	3.91781	0	1.02727	2.61323	0.423507	4.064				3.39062	0.673386
Suprasolidus	4.5	33.1	2.44461	0	0.640988	2.40405	0.443232	3.48827		4.18204	29.6851	0.907457	0	0.237939	2.15603	0.411914	2.80588		4.81796	36.5149	3.98177	0	1.04404	2.65208	0.47455	4.17067				3.48827	0.682393
Suprasolidus	1.6	21.2	2.35236	0	0.6168	1.53976	0.157594	2.31415		1.416	18.683	1.18146	0	0.309784	1.35695	0.13947	1.8062		1.784	23.717	3.52327	0	0.923817	1.72257	0.175717	2.8221				2.31415	0.507949
Suprasolidus	3.9	27	2.44461	0	0.640988	1.96101	0.384134	2.98613		3.61227	24.0276	1.08215	0	0.283744	1.74513	0.355794	2.38466		4.18773	29.9724	3.80708	0	0.998233	2.17689	0.412474	3.5876				2.98613	0.601469
Suprasolidus	2.8	25.2	1.84499	0	0.483765	1.83028	0.275789	2.58983		2.55848	22.3654	0.554769	0	0.145463	1.6244	0.252	2.02186		3.04152	28.0346	3.13521	0	0.822067	2.03615	0.299577	3.1578				2.58983	0.567967
Suprasolidus	4.8	31.7	2.26011	0	0.592612	2.30237	0.472781	3.36776		4.47401	28.3833	0.761928	0	0.199781	2.06148	0.440672	2.70194		5.12599	35.0167	3.7583	0	0.985443	2.54326	0.504889	4.03359				3.36776	0.665828
Suprasolidus	1.4	25.3	1.79887	0	0.471671	1.83754	0.137894	2.4471		1.21582	22.4578	0.516021	0	0.135303	1.63111	0.119753	1.88616		1.58418	28.1422	3.08171	0	0.808038	2.04397	0.156036	3.00805				2.4471	0.560941
Suprasolidus	5.2	32.8	2.76749	0	0.725647	2.38226	0.512179	3.62009		4.85941	29.4059	1.22813	0	0.322022	2.13575	0.478632	2.93641		5.54059	36.1941	4.30684	0	1.12927	2.62878	0.545726	4.30378				3.62009	0.683685
Suprasolidus	4.8	35.9	3.09036	0	0.810306	2.60742	0.472781	3.8905		4.46782	32.2944	1.4665	0	0.384522	2.34554	0.440062	3.17013		5.13218	39.5056	4.71422	0	1.23609	2.86929	0.505499	4.61088				3.8905	0.720379
Suprasolidus	2.5	26.1	2.49074	0	0.653083	1.89564	0.24624	2.79497		2.26872	23.1961	1.16413	0	0.305241	1.68474	0.22346	2.21344		2.73128	29.0039	3.81734	0	1.00092	2.10655	0.26902	3.37649				2.79497	0.581528
Suprasolidus	2.9	24.4	1.75274	0	0.459577	1.77217	0.285638	2.51739		2.65582	21.6276	0.487283	0	0.127768	1.57082	0.261588	1.96017		3.14418	27.1724	3.0182	0	0.791385	1.97353	0.309689	3.0746				2.51739	0.557217
Suprasolidus	5.5	39.3	3.36711	0	0.882871	2.85436	0.541728	4.27896		5.14147	35.4734	1.64828	0	0.432187	2.57643	0.506414	3.51503		5.85853	43.1266	5.08593	0	1.33356	3.13229	0.577042	5.04288				4.27896	0.763927
Suprasolidus	4.7	37.3	2.81361	0	0.737741	2.7091	0.462931	3.90977		4.36924	33.602	1.15888	0	0.303863	2.44051	0.430352	3.17473		5.03076	40.998	4.46834	0	1.17162	2.97768	0.49551	4.64481				3.90977	0.735042
Suprasolidus	3.7	29.8	2.26011	0	0.592612	2.16437	0.364435	3.12142		3.41559	26.6199	0.822757	0	0.215731	1.9334	0.336422	2.48556		3.98441	32.9801	3.69747	0	0.969493	2.39534	0.392449	3.75729				3.12142	0.635865
Suprasolidus	5.3	43.4	2.53686	0	0.665177	3.15214	0.522029	4.33935		4.94232	39.3223	0.732937	0	0.192179	2.85598	0.486799	3.53496		5.65768	47.4777	4.34079	0	1.13817	3.4483	0.557259	5.14374				4.33935	0.80439
Suprasolidus	1.8	21.3	1.10699	0	0.290259	1.54702	0.177293	2.01457		1.60827	18.7749	-0.0433704	0	-0.0113719	1.36362	0.158409	1.51066		1.99173	23.8251	2.25736	0	0.59189	1.73041	0.196177	2.51848				2.01457	0.50391
Suprasolidus	4.1	28.4	2.12174	0	0.55633	2.06269	0.403834	3.02286		3.80304	25.3228	0.723401	0	0.189679	1.83919	0.374584	2.40346		4.39696	31.4772	3.52008	0	0.92298	2.28619	0.433083	3.64225				3.02286	0.619399
Suprasolidus	3.8	27.3	2.02949	0	0.532141	1.9828	0.374285	2.88923		3.51578	24.305	0.666668	0	0.174803	1.76527	0.346291	2.28637		4.08422	30.295	3.39231	0	0.889479	2.20032	0.402279	3.49208				2.88923	0.602858
Suprasolidus	5.4	36.6	2.58299	0	0.677271	2.65826	0.531878	3.86741		5.04831	32.9479	0.945265	0	0.247853	2.39301	0.497238	3.1381		5.75169	40.2521	4.22071	0	1.10669	2.92351	0.566518	4.59672				3.86741	0.729308
Suprasolidus	4.4	35.4	2.44461	0	0.640988	2.5711	0.433382	3.64547		4.08213	31.8279	0.84691	0	0.222064	2.31166	0.402073	2.9358		4.71787	38.9721	4.04231	0	1.05991	2.83054	0.464691	4.35515				3.64547	0.709675
Suprasolidus	6.2	43	2.95198	0	0.774024	3.12309	0.610675	4.50779		5.81752	38.946	1.14632	0	0.300572	2.82865	0.573003	3.70222		6.58248	47.054	4.75764	0	1.24748	3.41753	0.648348	5.31336				4.50779	0.805566
Suprasolidus	3.2	21.8	1.98336	0	0.520047	1.58333	0.315187	2.41857		2.94763	19.2343	0.789356	0	0.206973	1.39698	0.29033	1.89429		3.45237	24.3657	3.17737	0	0.833122	1.76968	0.340044	2.94285				2.41857	0.524281
Suprasolidus	5	34.4	2.81361	0	0.737741	2.49847	0.49248	3.72869		4.66356	30.8955	1.23222	0	0.323092	2.24394	0.459342	3.02638		5.33644	37.9045	4.39501	0	1.15239	2.753	0.525618	4.43101				3.72869	0.702316
Suprasolidus	2.8	28.7	2.02949	0	0.532141	2.08448	0.275789	2.89241		2.55229	25.6007	0.633862	0	0.166202	1.85938	0.25139	2.27697		3.04771	31.7993	3.42512	0	0.898081	2.30959	0.300187	3.50785				2.89241	0.615444

## Sheet: Broken Hill
					Units - micro watts m-3					heat production lower bound									heat production upper bound											heat production	1 sigma error
Sample	K2O (wt%)	Th (ppm)	U (ppm)	∆Time (Ma)	heat from U at nominated time	heat from Th at time	heat from K at time	total heat production at time (micro watts m-3)		K2O (wt%)	Th (ppm)	U (ppm)	∆Time (Ma)	heat from U at nominated time	heat from Th at time	heat from K at time	total heat production at time (micro watts m-3)		K2O (wt%)	Th (ppm)	U (ppm)	∆Time (Ma)	heat from U at nominated time	heat from Th at time	heat from K at time	total heat production at time (micro watts m-3)
Subsolidus	2.4	18.4	2.44461	0	0.640988	1.33639	0.23639	2.21377		2.18652	16.1147	1.35158	0	0.35439	1.17041	0.215364	1.74017		2.61348	20.6853	3.53764	0	0.927586	1.50237	0.257417	2.68737				2.21377	0.473603
Subsolidus	2.2	18.7	1.98336	0	0.520047	1.35818	0.216691	2.09492		1.99509	16.3896	0.893112	0	0.234178	1.19038	0.196508	1.62106		2.40491	21.0104	3.07362	0	0.805916	1.52599	0.236874	2.56878				2.09492	0.473858
Subsolidus	4.6	23.9	3.59773	0	0.943342	1.73586	0.453082	3.13228		4.29073	21.1666	2.29593	0	0.602004	1.53733	0.42262	2.56195		4.90927	26.6334	4.89953	0	1.28468	1.93438	0.483544	3.70261				3.13228	0.570325
Subsolidus	2.6	18.5	1.91304	0	0.501609	1.34366	0.25609	2.10135		2.37805	16.2063	0.827138	0	0.216879	1.17707	0.234229	1.62818		2.82195	20.7937	2.99895	0	0.786338	1.51024	0.27795	2.57453				2.10135	0.473178
Subsolidus	1.6	14.9	1.47599	0	0.387012	1.08219	0.157594	1.62679		1.42938	12.9156	0.522308	0	0.136951	0.938063	0.140788	1.2158		1.77062	16.8844	2.42968	0	0.637072	1.22631	0.174399	2.03778				1.62679	0.41099
Subsolidus	2.2	21.4	2.39849	0	0.628894	1.55428	0.216691	2.39987		1.98991	18.8667	1.21621	0	0.318895	1.37029	0.195998	1.88518		2.41009	23.9333	3.58077	0	0.938894	1.73827	0.237384	2.91455				2.39987	0.514685
Subsolidus	3.9	24	2.44461	0	0.640988	1.74312	0.384134	2.76824		3.61664	21.2589	1.16963	0	0.306682	1.54403	0.356224	2.20694		4.18336	26.7411	3.7196	0	0.975295	1.94221	0.412044	3.32955				2.76824	0.561305
Subsolidus	2.5	16.8	2.16786	0	0.568424	1.22018	0.24624	2.03485		2.28497	14.6507	1.12996	0	0.296281	1.06408	0.22506	1.58542		2.71503	18.9493	3.20577	0	0.840567	1.37629	0.26742	2.48427				2.03485	0.449425
Subsolidus	0.7	6.1	1.06087	0	0.278165	0.443043	0.0689472	0.790155		0.589679	4.92599	0.407807	0	0.106929	0.357774	0.058081	0.522784		0.810321	7.27401	1.71393	0	0.449401	0.528312	0.0798134	1.05753				0.790155	0.267371
Subsolidus	4.8	22.5	2.26011	0	0.592612	1.63417	0.472781	2.69957		4.48621	19.8778	1.02548	0	0.268886	1.44373	0.441874	2.15449		5.11379	25.1222	3.49475	0	0.916338	1.82462	0.503688	3.24465				2.69957	0.545082
Subsolidus	0.8	6.3	1.29149	0	0.338635	0.457569	0.0787968	0.875001		0.684011	5.10667	0.623767	0	0.163554	0.370898	0.0673723	0.601825		0.915989	7.49333	1.95922	0	0.513716	0.54424	0.0902213	1.14818				0.875001	0.273177
Subsolidus	0.8	9.9	2.39849	0	0.628894	0.719037	0.0787968	1.42673		0.675495	8.36649	1.58416	0	0.415374	0.607658	0.0665335	1.08957		0.924505	11.4335	3.21281	0	0.842414	0.830416	0.0910601	1.76389				1.42673	0.337162
Subsolidus	2.3	18.8	1.75274	0	0.459577	1.36544	0.226541	2.05156		2.09071	16.4812	0.663553	0	0.173987	1.19703	0.205926	1.57694		2.50929	21.1188	2.84193	0	0.745167	1.53386	0.247155	2.52618				2.05156	0.474619
Subsolidus	2.8	18.7	1.93724	0	0.507953	1.35818	0.275789	2.14192		2.56914	16.3895	0.842815	0	0.22099	1.19037	0.25305	1.66441		3.03086	21.0105	3.03167	0	0.794916	1.52599	0.298528	2.61943				2.14192	0.477512
Subsolidus	2.6	14.7	1.52212	0	0.399106	1.06766	0.25609	1.72286		2.38425	12.7331	0.564528	0	0.148022	0.924805	0.234839	1.30767		2.81575	16.6669	2.47971	0	0.65019	1.21052	0.27734	2.13805				1.72286	0.41519
Subsolidus	2.1	14.2	2.53686	0	0.665177	1.03135	0.206842	1.90336		1.9068	12.2771	1.57427	0	0.412781	0.891688	0.187812	1.49228		2.2932	16.1229	3.49945	0	0.917572	1.171	0.225871	2.31445				1.90336	0.411083
Subsolidus	3.6	24.5	2.07561	0	0.544235	1.77944	0.354586	2.67826		3.32759	21.7197	0.795484	0	0.208579	1.57751	0.327754	2.11384		3.87241	27.2803	3.35575	0	0.879892	1.98136	0.381417	3.24267				2.67826	0.564417
Subsolidus	3.6	25.6	2.95198	0	0.774024	1.85933	0.354586	2.98794		3.32545	22.7344	1.62259	0	0.42545	1.6512	0.327543	2.40419		3.87455	28.4656	4.28138	0	1.1226	2.06746	0.381628	3.57168				2.98794	0.583744
Subsolidus	3.9	24.9	3.41323	0	0.894965	1.80849	0.384134	3.08759		3.61485	22.0885	2.09225	0	0.548597	1.60429	0.356048	2.50893		4.18515	27.7115	4.73422	0	1.24133	2.01269	0.412221	3.66624				3.08759	0.578653
Subsolidus	3.4	23.1	2.53686	0	0.665177	1.67775	0.334886	2.67782		3.13728	20.43	1.29089	0	0.338477	1.48383	0.30901	2.13132		3.66272	25.77	3.78284	0	0.991877	1.87167	0.360763	3.22431				2.67782	0.546496
Subsolidus	2.8	23.1	2.58299	0	0.677271	1.67775	0.275789	2.63081		2.56157	20.4301	1.34096	0	0.351607	1.48384	0.252304	2.08775		3.03843	25.7699	3.82501	0	1.00293	1.87167	0.299273	3.17388				2.63081	0.543065
Subsolidus	2.8	23.2	1.66049	0	0.435388	1.68502	0.275789	2.39619		2.562	20.5222	0.433661	0	0.113708	1.49053	0.252346	1.85658		3.038	25.8778	2.88732	0	0.757069	1.87951	0.299231	2.93581				2.39619	0.539612
Subsolidus	2.6	20.9	2.07561	0	0.544235	1.51797	0.25609	2.31829		2.37397	18.4074	0.9122	0	0.239183	1.33693	0.233826	1.80994		2.82603	23.3926	3.23903	0	0.849288	1.699	0.278353	2.82664				2.31829	0.508352
Subsolidus	3.9	30.1	2.95198	0	0.774024	2.18616	0.384134	3.34432		3.60738	26.8981	1.49254	0	0.39135	1.95361	0.355312	2.70027		4.19262	33.3019	4.41143	0	1.1567	2.41872	0.412956	3.98837				3.34432	0.644052
Subsolidus	3.2	20.8	2.30624	0	0.604706	1.5107	0.315187	2.4306		2.94896	18.3155	1.13591	0	0.29784	1.33026	0.290461	1.91856		3.45104	23.2845	3.47657	0	0.911572	1.69115	0.339913	2.94264				2.4306	0.512039
Subsolidus	2.6	21.1	1.93724	0	0.507953	1.53249	0.25609	2.29654		2.37372	18.5911	0.770559	0	0.202044	1.35027	0.233802	1.78612		2.82628	23.6089	3.10392	0	0.813862	1.71471	0.278377	2.80695				2.29654	0.510417
Subsolidus	3.8	24	2.62911	0	0.689365	1.74312	0.374285	2.80677		3.52033	21.2589	1.35129	0	0.354313	1.54403	0.346739	2.24508		4.07967	26.7411	3.90694	0	1.02442	1.94221	0.401831	3.36846				2.80677	0.561686
Subsolidus	3.5	28.1	1.29149	0	0.338635	2.0409	0.344736	2.72427		3.22635	25.0452	-0.079666	0	-0.0208888	1.81903	0.317782	2.11592		3.77365	31.1548	2.66265	0	0.69816	2.26278	0.37169	3.33263				2.72427	0.608351
Subsolidus	3.8	28.9	3.64386	0	0.955436	2.09901	0.374285	3.42873		3.51254	25.7858	2.20546	0	0.578281	1.87282	0.345971	2.79707		4.08746	32.0142	5.08226	0	1.33259	2.32519	0.402598	4.06038				3.42873	0.631656
Subsolidus	4.3	30.1	2.76749	0	0.725647	2.18616	0.423533	3.33534		3.99311	26.8981	1.30841	0	0.343071	1.95361	0.393305	2.68998		4.60689	33.3019	4.22656	0	1.10822	2.41872	0.453761	3.98071				3.33534	0.645362
Subsolidus	3.9	27.6	2.85974	0	0.749836	2.00459	0.384134	3.13856		3.61117	24.5824	1.47232	0	0.386049	1.78542	0.355686	2.52716		4.18883	30.6176	4.24715	0	1.11362	2.22375	0.412583	3.74996				3.13856	0.611402
Subsolidus	3.9	25.4	1.79887	0	0.471671	1.8448	0.384134	2.70061		3.61497	22.5499	0.494793	0	0.129737	1.6378	0.35606	2.12359		4.18503	28.2501	3.10294	0	0.813604	2.05181	0.412209	3.27762				2.70061	0.577013
Subsolidus	3.6	21.9	2.58299	0	0.677271	1.5906	0.354586	2.62245		3.33114	19.3261	1.37016	0	0.359262	1.40366	0.328104	2.09102		3.86886	24.4739	3.79582	0	0.99528	1.77754	0.381067	3.15388				2.62245	0.531431
Subsolidus	3.4	23.7	2.53686	0	0.665177	1.72133	0.334886	2.72139		3.13637	20.9825	1.27307	0	0.333806	1.52396	0.30892	2.16669		3.66363	26.4175	3.80065	0	0.996548	1.9187	0.360853	3.2761				2.72139	0.554708
Subsolidus	3.3	23.7	1.93724	0	0.507953	1.72133	0.325037	2.55432		3.04069	20.9826	0.686034	0	0.179881	1.52396	0.299496	2.00334		3.55931	26.4174	3.18845	0	0.836025	1.9187	0.350578	3.1053				2.55432	0.55098
Subsolidus	3.5	28.4	1.33762	0	0.35073	2.06269	0.344736	2.75816		3.22585	25.3229	-0.0429631	0	-0.0112651	1.8392	0.317733	2.14567		3.77415	31.4771	2.7182	0	0.712724	2.28619	0.371739	3.37065				2.75816	0.612491
Subsolidus	3.6	22.6	1.42987	0	0.374918	1.64144	0.354586	2.37094		3.33078	19.97	0.218822	0	0.0573761	1.45042	0.328069	1.83586		3.86922	25.23	2.64091	0	0.692459	1.83246	0.381102	2.90602				2.37094	0.535078
Subsolidus	2.7	22.3	0.96862	0	0.253977	1.61965	0.265939	2.13956		2.46814	19.6941	-0.217174	0	-0.0569441	1.43038	0.243102	1.61654		2.93186	24.9059	2.15441	0	0.564897	1.80892	0.288776	2.66259				2.13956	0.523025
Subsolidus	4.9	31.8	2.16786	0	0.568424	2.30963	0.48263	3.36069		4.57063	28.4763	0.667732	0	0.175082	2.06823	0.450189	2.6935		5.22937	35.1237	3.668	0	0.961765	2.55104	0.515072	4.02787				3.36069	0.667187
Subsolidus	3.4	23.7	1.24537	0	0.326541	1.72133	0.334886	2.38276		3.13713	20.9826	0.00607732	0	0.0015935	1.52397	0.308995	1.83455		3.66287	26.4174	2.48466	0	0.651489	1.9187	0.360778	2.93096				2.38276	0.548204
Subsolidus	1.4	11.4	1.70662	0	0.447483	0.827982	0.137894	1.41336		1.245	9.72863	0.860624	0	0.22566	0.70659	0.122627	1.05488		1.555	13.0714	2.55261	0	0.669305	0.949374	0.153161	1.77184				1.41336	0.358481
Subsolidus	3.8	26.4	2.49074	0	0.653083	1.91743	0.374285	2.9448		3.51688	23.4732	1.14552	0	0.300361	1.70486	0.346399	2.35161		4.08312	29.3268	3.83595	0	1.0058	2.13001	0.402171	3.53798				2.9448	0.593185
Subsolidus	4.2	25	1.66049	0	0.435388	1.81575	0.413683	2.66482		3.9045	22.1808	0.368222	0	0.0965496	1.61099	0.384577	2.09212		4.4955	27.8192	2.95276	0	0.774227	2.02051	0.442789	3.23752				2.66482	0.572702
Subsolidus	3.8	20	1.70662	0	0.447483	1.4526	0.374285	2.27437		3.52649	17.5813	0.567738	0	0.148863	1.27693	0.347345	1.77314		4.07351	22.4187	2.84549	0	0.746102	1.62827	0.401225	2.7756				2.27437	0.501232
Subsolidus	5.4	29.3	3.45936	0	0.907059	2.12806	0.531878	3.567		5.05746	26.1563	2.00156	0	0.524817	1.89973	0.498139	2.92269		5.74254	32.4437	4.91716	0	1.2893	2.35639	0.565617	4.21131				3.567	0.644311
Subsolidus	5.4	25.4	2.07561	0	0.544235	1.8448	0.531878	2.92092		5.06296	22.5497	0.75422	0	0.19776	1.63779	0.498681	2.33423		5.73704	28.2503	3.39701	0	0.890711	2.05182	0.565076	3.5076				2.92092	0.586687
Subsolidus	1.7	14.5	1.52212	0	0.399106	1.05314	0.167443	1.61968		1.52549	12.5508	0.579296	0	0.151894	0.911563	0.150254	1.21371		1.87451	16.4492	2.46494	0	0.646318	1.19471	0.184632	2.02566				1.61968	0.405973
Subsolidus	4.7	28.9	3.13648	0	0.8224	2.09901	0.462931	3.38434		4.38079	25.7857	1.70108	0	0.446031	1.87282	0.431491	2.75034		5.01921	32.0143	4.57189	0	1.19877	2.3252	0.494372	4.01834				3.38434	0.634
Subsolidus	4.6	26.2	2.99811	0	0.786118	1.90291	0.453082	3.14211		4.28795	23.2883	1.64251	0	0.430674	1.69143	0.422345	2.54445		4.91205	29.1117	4.35371	0	1.14156	2.11438	0.483818	3.73976				3.14211	0.597655
Subsolidus	4.2	25.4	3.36711	0	0.882871	1.8448	0.413683	3.14136		3.90307	22.5498	2.03025	0	0.532342	1.63779	0.384437	2.55457		4.49693	28.2502	4.70396	0	1.2334	2.05181	0.442929	3.72814				3.14136	0.586788
Subsolidus	3.1	21.9	1.29149	0	0.338635	1.5906	0.305338	2.23457		2.85199	19.3262	0.108723	0	0.0285078	1.40366	0.28091	1.71308		3.34801	24.4738	2.47426	0	0.648763	1.77753	0.329766	2.75606				2.23457	0.521488
Subsolidus	3.3	24	1.24537	0	0.326541	1.74312	0.325037	2.3947		3.04064	21.259	-0.00214323	0	-0.000561966	1.54404	0.299491	1.84297		3.55936	26.741	2.49288	0	0.653645	1.9422	0.350583	2.94643				2.3947	0.551729
Subsolidus	3.4	27.1	1.38374	0	0.362824	1.96827	0.334886	2.66598		3.13174	24.1202	0.0409545	0	0.0107385	1.75185	0.308463	2.07105		3.66826	30.0798	2.72653	0	0.714909	2.1847	0.361309	3.26092				2.66598	0.594935
Subsolidus	3.6	21.2	1.61437	0	0.423294	1.53976	0.354586	2.31764		3.33271	18.6829	0.442433	0	0.116008	1.35694	0.328259	1.80121		3.86729	23.7171	2.7863	0	0.730581	1.72257	0.380913	2.83407				2.31764	0.51643
Subsolidus	4	25.5	1.75274	0	0.459577	1.85207	0.393984	2.70563		3.71111	22.6422	0.445731	0	0.116873	1.6445	0.36553	2.1269		4.28889	28.3578	3.05975	0	0.802281	2.05963	0.422438	3.28435				2.70563	0.578724
Subsolidus	3.4	21.3	1.84499	0	0.483765	1.54702	0.334886	2.36567		3.14039	18.7748	0.667215	0	0.174947	1.36361	0.309316	1.84787		3.65961	23.8252	3.02277	0	0.792583	1.73043	0.360457	2.88347				2.36567	0.517796
Subsolidus	3.1	24.3	2.26011	0	0.592612	1.76491	0.305338	2.66286		2.84756	21.5354	0.986438	0	0.258649	1.56412	0.280473	2.10324		3.35244	27.0646	3.53379	0	0.926575	1.9657	0.330202	3.22248				2.66286	0.559619
Subsolidus	3.7	22.6	2.76749	0	0.725647	1.64144	0.364435	2.73152		3.42613	19.9699	1.52905	0	0.400924	1.45041	0.33746	2.1888		3.97387	25.2301	4.00592	0	1.05037	1.83246	0.39141	3.27425				2.73152	0.542725
Subsolidus	3.3	34.9	3.22873	0	0.846589	2.53479	0.325037	3.70641		3.02182	31.3617	1.63864	0	0.429659	2.2778	0.297637	3.00509		3.57818	38.4383	4.81883	0	1.26352	2.79178	0.352436	4.40773				3.70641	0.701319
Subsolidus	2.1	17.3	2.26011	0	0.592612	1.2565	0.206842	2.05595		1.90175	15.108	1.20797	0	0.316736	1.09729	0.187315	1.60134		2.29825	19.492	3.31225	0	0.868488	1.41571	0.226368	2.51056				2.05595	0.454609
Subsolidus	2	20.5	1.56824	0	0.4112	1.48891	0.196992	2.09711		1.80083	18.0402	0.432325	0	0.113358	1.31026	0.177374	1.601		2.19917	22.9598	2.70416	0	0.709043	1.66757	0.21661	2.59322				2.09711	0.496112
Subsolidus	2.5	22.2	2.12174	0	0.55633	1.61239	0.24624	2.41496		2.27593	19.6021	0.918579	0	0.240855	1.4237	0.22417	1.88872		2.72407	24.7979	3.3249	0	0.871804	1.80107	0.26831	2.94119				2.41496	0.526231
Subsolidus	3.1	29.7	2.62911	0	0.689365	2.15711	0.305338	3.15181		2.83842	26.5272	1.19244	0	0.312664	1.92667	0.279573	2.51891		3.36158	32.8728	4.06578	0	1.06607	2.38755	0.331102	3.78472				3.15181	0.632905
Subsolidus	3.3	24.4	2.30624	0	0.604706	1.77217	0.325037	2.70191		3.03938	21.6276	1.0271	0	0.26931	1.57081	0.299367	2.13949		3.56062	27.1724	3.58538	0	0.940103	1.97353	0.350707	3.26434				2.70191	0.562428
Subsolidus	3.5	22.1	1.93724	0	0.507953	1.60512	0.344736	2.45781		3.23516	19.5101	0.732469	0	0.192057	1.41702	0.318651	1.92772		3.76484	24.6899	3.14201	0	0.823849	1.79323	0.370821	2.9879				2.45781	0.53009
Subsolidus	2.8	25.7	1.70662	0	0.447483	1.86659	0.275789	2.58986		2.55771	22.8268	0.40407	0	0.105949	1.65791	0.251925	2.01579		3.04229	28.5732	3.00916	0	0.789016	2.07527	0.299653	3.16394				2.58986	0.574075
Subsolidus	3.1	21.7	1.98336	0	0.520047	1.57607	0.305338	2.40146		2.85187	19.1424	0.793248	0	0.207993	1.39031	0.280898	1.8792		3.34813	24.2576	3.17348	0	0.832101	1.76183	0.329778	2.92371				2.40146	0.522256
Subsolidus	2.6	20.9	2.30624	0	0.604706	1.51797	0.25609	2.37876		2.37381	18.4074	1.13797	0	0.298381	1.33693	0.233811	1.86912		2.82619	23.3926	3.47451	0	0.911031	1.699	0.278368	2.8884				2.37876	0.509641
Subsolidus	2.8	23.5	2.44461	0	0.640988	1.70681	0.275789	2.62358		2.56098	20.7984	1.19347	0	0.312934	1.51059	0.252247	2.07577		3.03902	26.2016	3.69575	0	0.969043	1.90302	0.299331	3.1714				2.62358	0.547816
Subsolidus	3	17.9	1.66049	0	0.435388	1.30008	0.295488	2.03095		2.76205	15.657	0.59513	0	0.156046	1.13716	0.272051	1.56526		3.23795	20.143	2.72585	0	0.714731	1.46299	0.318925	2.49665				2.03095	0.465692
Subsolidus	2.9	18	3.13648	0	0.8224	1.30734	0.285638	2.41538		2.66519	15.7484	2.03482	0	0.53354	1.14381	0.26251	1.93986		3.13481	20.2516	4.23814	0	1.11126	1.47087	0.308767	2.8909				2.41538	0.475522
Subsolidus	2.6	19.1	3.87448	0	1.01591	1.38723	0.25609	2.65923		2.3758	16.756	2.72413	0	0.714279	1.21699	0.234006	2.16527		2.8242	21.444	5.02483	0	1.31753	1.55748	0.278173	3.15319				2.65923	0.493958
Subsolidus	3.3	20.1	3.32098	0	0.870777	1.45986	0.325037	2.65568		3.04534	17.6729	2.1482	0	0.563268	1.28359	0.299954	2.14681		3.55466	22.5271	4.49377	0	1.17829	1.63614	0.35012	3.16455				2.65568	0.508869
Subsolidus	2.7	22.7	3.04423	0	0.798212	1.6487	0.265939	2.71285		2.46609	20.0619	1.80519	0	0.473329	1.4571	0.2429	2.17333		2.93391	25.3381	4.28328	0	1.12309	1.8403	0.288978	3.25238				2.71285	0.539524
Subsolidus	2.5	31.5	3.73611	0	0.979624	2.28785	0.24624	3.51371		2.25805	28.1976	2.2332	0	0.585556	2.04799	0.222409	2.85596		2.74195	34.8024	5.23901	0	1.37369	2.5277	0.270071	4.17146				3.51371	0.657751
Subsolidus	2.4	32	3.32098	0	0.870777	2.32416	0.23639	3.43133		2.16126	28.6622	1.81277	0	0.475315	2.08174	0.212875	2.76993		2.63874	35.3378	4.8292	0	1.26624	2.56658	0.259906	4.09273				3.43133	0.6614
Subsolidus	2.1	30.4	3.55161	0	0.931247	2.20795	0.206842	3.34604		1.87595	27.1765	2.08492	0	0.546676	1.97383	0.184774	2.70528		2.32405	33.6235	5.01829	0	1.31582	2.44208	0.22891	3.98681				3.34604	0.640766
Subsolidus	3	23.7	4.38185	0	1.14894	1.72133	0.295488	3.16576		2.75138	20.9825	3.08131	0	0.807933	1.52396	0.271	2.60289		3.24862	26.4175	5.6824	0	1.48995	1.91871	0.319976	3.72863				3.16576	0.562871
Subsolidus	3	23	4.15123	0	1.08847	1.67049	0.295488	3.05445		2.75263	20.3379	2.87625	0	0.754166	1.47714	0.271123	2.50243		3.24737	25.6621	5.42621	0	1.42278	1.86384	0.319853	3.60646				3.05445	0.552016
Subsolidus	2.1	16.1	2.12174	0	0.55633	1.16934	0.206842	1.93251		1.90394	14.0111	1.11036	0	0.291142	1.01762	0.187531	1.4963		2.29606	18.1889	3.13312	0	0.821517	1.32106	0.226152	2.36873				1.93251	0.436219
Subsolidus	3.5	30.6	2.99811	0	0.786118	2.22248	0.344736	3.35333		3.22144	27.362	1.52686	0	0.40035	1.9873	0.317299	2.70495		3.77856	33.838	4.46936	0	1.17189	2.45766	0.372173	4.00172				3.35333	0.648383
Subsolidus	4.2	33.1	4.2896	0	1.12475	2.40405	0.413683	3.94249		3.89157	29.685	2.72181	0	0.713671	2.15602	0.383304	3.253		4.50843	36.515	5.85739	0	1.53584	2.65208	0.444062	4.63198				3.94249	0.689491
Subsolidus	3.5	25.8	3.59773	0	0.943342	1.87385	0.344736	3.16193		3.22866	22.919	2.25018	0	0.590007	1.66461	0.31801	2.57263		3.77134	28.681	4.94528	0	1.29668	2.0831	0.371462	3.75124				3.16193	0.589306
Subsolidus	3.6	22.9	3.64386	0	0.955436	1.66323	0.354586	2.97325		3.32912	20.2459	2.37844	0	0.623637	1.47046	0.327905	2.422		3.87088	25.5541	4.90928	0	1.28723	1.856	0.381266	3.5245				2.97325	0.551248
Subsolidus	4.8	31.6	5.7656	0	1.51177	2.29511	0.472781	4.27965		4.47279	28.2903	4.20343	0	1.10216	2.05472	0.440552	3.59743		5.12721	34.9097	7.32776	0	1.92137	2.53549	0.50501	4.96187				4.27965	0.68222
Subsolidus	2.9	22	2.53686	0	0.665177	1.59786	0.285638	2.54868		2.65928	19.4181	1.32795	0	0.348195	1.41034	0.261928	2.02046		3.14072	24.5819	3.74577	0	0.982159	1.78538	0.309349	3.07689				2.54868	0.528214
Subsolidus	4.4	33.3	3.13648	0	0.8224	2.41858	0.433382	3.67436		4.08484	29.8712	1.58298	0	0.415064	2.16954	0.402341	2.98695		4.71516	36.7288	4.68999	0	1.22974	2.66761	0.464424	4.36177				3.67436	0.687413
Subsolidus	3.9	24.2	5.11985	0	1.34245	1.75765	0.384134	3.48423		3.61511	21.443	3.78066	0	0.991305	1.55741	0.356074	2.90479		4.18489	26.957	6.45904	0	1.69359	1.95788	0.412195	4.06367				3.48423	0.57944
Subsolidus	4.4	23.6	2.49074	0	0.653083	1.71407	0.433382	2.80053		4.09874	20.8903	1.2224	0	0.320518	1.51727	0.403709	2.24149		4.70126	26.3097	3.75908	0	0.985647	1.91087	0.463056	3.35957				2.80053	0.55904
Subsolidus	4.6	33.5	2.58299	0	0.677271	2.4331	0.453082	3.56346		4.27802	30.0574	1.0321	0	0.270621	2.18307	0.421368	2.87506		4.92198	36.9426	4.13387	0	1.08392	2.68314	0.484795	4.25186				3.56346	0.688402
Subsolidus	1.8	18.7	1.42987	0	0.374918	1.35818	0.177293	1.91039		1.61314	16.3896	0.354689	0	0.0930011	1.19038	0.158887	1.44227		1.98686	21.0104	2.50505	0	0.656834	1.52598	0.195698	2.37851				1.91039	0.468123
Subsolidus	1.9	20.3	2.81361	0	0.737741	1.47439	0.187142	2.39927		1.70457	17.8566	1.65793	0	0.434716	1.29693	0.167893	1.89954		2.09543	22.7434	3.96929	0	1.04077	1.65185	0.206392	2.89901				2.39927	0.499738
Subsolidus	1.6	21.7	2.07561	0	0.544235	1.57607	0.157594	2.2779		1.41518	19.1425	0.895197	0	0.234725	1.39032	0.13939	1.76443		1.78482	24.2575	3.25603	0	0.853746	1.76183	0.175797	2.79137				2.2779	0.513469
Subsolidus	2	16.6	1.70662	0	0.447483	1.20566	0.196992	1.85013		1.8079	14.468	0.690112	0	0.18095	1.05081	0.178071	1.40983		2.1921	18.732	2.72312	0	0.714015	1.36051	0.215913	2.29043				1.85013	0.440302
Subsolidus	2.7	20.7	2.12174	0	0.55633	1.50344	0.265939	2.32571		2.47004	18.2238	0.962646	0	0.25241	1.32359	0.243289	1.81929		2.92996	23.1762	3.28083	0	0.860249	1.68329	0.28859	2.83213				2.32571	0.506419
Subsolidus	1.1	8.3	1.24537	0	0.326541	0.602829	0.108346	1.03772		0.9656	6.91613	0.513842	0	0.134732	0.502319	0.0951078	0.732158		1.2344	9.68387	1.9769	0	0.518351	0.703339	0.121583	1.34327				1.03772	0.305558
Subsolidus	0.8	8.4	1.10699	0	0.290259	0.610092	0.0787968	0.979148		0.680231	7.00675	0.37897	0	0.0993678	0.508901	0.0670001	0.675268		0.919769	9.79325	1.83502	0	0.48115	0.711283	0.0905935	1.28303				0.979148	0.303879
Subsolidus	0.8	9.3	1.66049	0	0.435388	0.675459	0.0787968	1.18964		0.677673	7.82235	0.887325	0	0.232661	0.568137	0.0667481	0.867546		0.922327	10.7777	2.43366	0	0.638116	0.782781	0.0908455	1.51174				1.18964	0.322098
Subsolidus	0.5	5.5	1.10699	0	0.290259	0.399465	0.049248	0.738972		0.400644	4.38405	0.472525	0	0.123898	0.318413	0.0394618	0.481774		0.599356	6.61595	1.74146	0	0.45662	0.480517	0.0590342	0.99617				0.738972	0.257198
Subsolidus	2.3	15.9	1.06087	0	0.278165	1.15482	0.226541	1.65952		2.09613	13.8284	0.0784431	0	0.0205681	1.00436	0.20646	1.23139		2.50387	17.9716	2.0433	0	0.535761	1.30528	0.246621	2.08766				1.65952	0.428136
Subsolidus	2.2	26.4	1.19924	0	0.314447	1.91743	0.216691	2.44857		1.98135	23.4733	-0.110968	0	-0.0290962	1.70487	0.195155	1.87093		2.41865	29.3267	2.50946	0	0.657991	2.13	0.238227	3.02621				2.44857	0.577644
Subsolidus	4	24.1	2.16786	0	0.568424	1.75038	0.393984	2.71279		3.71289	21.351	0.894477	0	0.234536	1.55073	0.365704	2.15097		4.28711	26.849	3.44125	0	0.902312	1.95004	0.422264	3.27462				2.71279	0.561825
Subsolidus	3.7	29.3	2.95198	0	0.774024	2.12806	0.364435	3.26652		3.41599	26.1564	1.51633	0	0.397588	1.89974	0.336462	2.63379		3.98401	32.4436	4.38764	0	1.15046	2.35638	0.392409	3.89925				3.26652	0.632729
Subsolidus	2.8	22.2	2.44461	0	0.640988	1.61239	0.275789	2.52916		2.56315	19.602	1.23243	0	0.323149	1.4237	0.25246	1.9993		3.03685	24.798	3.65679	0	0.958828	1.80108	0.299117	3.05902				2.52916	0.529858
Subsolidus	3	22.6	2.02949	0	0.532141	1.64144	0.295488	2.46907		2.75451	19.97	0.812036	0	0.212919	1.45042	0.271308	1.93465		3.24549	25.23	3.24694	0	0.851363	1.83246	0.319668	3.00349				2.46907	0.534421
Subsolidus	2.9	30.6	2.16786	0	0.568424	2.22248	0.285638	3.07654		2.64495	27.3621	0.715332	0	0.187563	1.98731	0.260517	2.43539		3.15505	33.8379	3.6204	0	0.949284	2.45765	0.31076	3.71769				3.07654	0.641154
Subsolidus	2.1	21.4	1.84499	0	0.483765	1.55428	0.206842	2.24489		1.8946	18.8667	0.674926	0	0.176969	1.37029	0.186611	1.73387		2.3054	23.9333	3.01506	0	0.790561	1.73827	0.227072	2.75591				2.24489	0.511017
Subsolidus	3.4	23.9	1.47599	0	0.387012	1.73586	0.334886	2.45776		3.13668	21.1668	0.226536	0	0.0593987	1.53735	0.308951	1.9057		3.66332	26.6332	2.72545	0	0.714625	1.93437	0.360822	3.00981				2.45776	0.552059
Subsolidus	3	29	1.52212	0	0.399106	2.10627	0.295488	2.80086		2.74418	25.8785	0.124976	0	0.0327693	1.87956	0.270291	2.18262		3.25582	32.1215	2.91926	0	0.765443	2.33298	0.320685	3.41911				2.80086	0.618245
Subsolidus	3.2	23.7	2.12174	0	0.55633	1.72133	0.315187	2.59285		2.94458	20.9826	0.867803	0	0.227542	1.52396	0.29003	2.04154		3.45542	26.4174	3.37567	0	0.885117	1.9187	0.340345	3.14416				2.59285	0.551312
Subsolidus	3.3	28.5	1.79887	0	0.471671	2.06996	0.325037	2.86666		3.03313	25.4154	0.409289	0	0.107317	1.84592	0.298751	2.25199		3.56687	31.5846	3.18844	0	0.836024	2.29399	0.351323	3.48133				2.86666	0.614672
Subsolidus	3.1	23.7	1.75274	0	0.459577	1.72133	0.305338	2.48625		2.84884	20.9826	0.506668	0	0.132851	1.52397	0.280599	1.93742		3.35116	26.4174	2.99881	0	0.786303	1.9187	0.330076	3.03507				2.48625	0.548829
Subsolidus	3.2	23.4	1.89112	0	0.495859	1.69954	0.315187	2.51059		2.9452	20.7063	0.650611	0	0.170593	1.5039	0.29009	1.96458		3.4548	26.0937	3.13162	0	0.821125	1.89519	0.340284	3.0566				2.51059	0.546007
Subsolidus	4.2	29.9	2.85974	0	0.749836	2.17164	0.413683	3.33516		3.89689	26.7126	1.4053	0	0.368477	1.94013	0.383828	2.69244		4.50311	33.0874	4.31417	0	1.13119	2.40314	0.443538	3.97787				3.33516	0.642716
Subsolidus	3.8	29	2.90586	0	0.76193	2.10627	0.374285	3.24248		3.51275	25.8784	1.47873	0	0.38773	1.87955	0.345992	2.61327		4.08725	32.1216	4.33299	0	1.13613	2.33299	0.402578	3.8717				3.24248	0.629212
Subsolidus	2.1	19.2	1.61437	0	0.423294	1.3945	0.206842	2.02463		1.89885	16.8478	0.517259	0	0.135628	1.22366	0.187029	1.54631		2.30115	21.5522	2.71147	0	0.710961	1.56534	0.226654	2.50295				2.02463	0.47832
Subsolidus	3.4	26.3	2.07561	0	0.544235	1.91017	0.334886	2.78929		3.1326	23.3808	0.744145	0	0.195118	1.69815	0.308548	2.20182		3.6674	29.2192	3.40708	0	0.893353	2.12219	0.361225	3.37677				2.78929	0.587475
Subsolidus	3.1	25	2.26011	0	0.592612	1.81575	0.305338	2.7137		2.84643	22.1809	0.965723	0	0.253217	1.611	0.280362	2.14457		3.35357	27.8191	3.5545	0	0.932007	2.0205	0.330313	3.28282				2.7137	0.569125
Subsolidus	3.4	22.5	2.58299	0	0.677271	1.63417	0.334886	2.64633		3.13816	19.8779	1.35394	0	0.35501	1.44373	0.309097	2.10784		3.66184	25.1221	3.81203	0	0.999531	1.82462	0.360676	3.18483				2.64633	0.538493
Subsolidus	3.8	30.5	1.75274	0	0.459577	2.21522	0.374285	3.04908		3.51107	27.2692	0.303435	0	0.0795621	1.98056	0.345827	2.40595		4.08893	33.7308	3.20205	0	0.839591	2.44987	0.402743	3.6922				3.04908	0.643124
Subsolidus	3.8	31.3	1.84499	0	0.483765	2.27332	0.374285	3.13137		3.50979	28.0119	0.371857	0	0.0975025	2.0345	0.345701	2.4777		4.09021	34.5881	3.31812	0	0.870027	2.51214	0.402869	3.78503				3.13137	0.653664
Subsolidus	2.4	15.6	1.52212	0	0.399106	1.13303	0.23639	1.76852		2.19178	13.5544	0.537934	0	0.141049	0.984459	0.215882	1.34139		2.60822	17.6456	2.5063	0	0.657163	1.2816	0.256899	2.19566				1.76852	0.427135
Subsolidus	4.1	31.5	2.58299	0	0.677271	2.28785	0.403834	3.36895		3.79824	28.1976	1.08992	0	0.285782	2.04799	0.374112	2.70788		4.40176	34.8024	4.07605	0	1.06876	2.5277	0.433555	4.03002				3.36895	0.661066
Subsolidus	3.9	24.1	2.62911	0	0.689365	1.75038	0.384134	2.82388		3.6164	21.351	1.34751	0	0.353323	1.55072	0.356201	2.26025		4.1836	26.849	3.91071	0	1.02541	1.95004	0.412068	3.38752				2.82388	0.563635
Subsolidus	2.9	24.9	1.61437	0	0.423294	1.80849	0.285638	2.51742		2.65507	22.0887	0.336492	0	0.0882298	1.6043	0.261514	1.95404		3.14493	27.7113	2.89224	0	0.758359	2.01267	0.309763	3.0808				2.51742	0.563376
Subsolidus	2.9	23.6	2.49074	0	0.653083	1.71407	0.285638	2.65279		2.65668	20.8905	1.2349	0	0.323796	1.51727	0.261673	2.10274		3.14332	26.3095	3.74658	0	0.982369	1.91086	0.309604	3.20284				2.65279	0.550046
Subsolidus	4.1	22.8	1.93724	0	0.507953	1.65596	0.403834	2.56775		3.81109	20.1539	0.706155	0	0.185157	1.46378	0.375377	2.02431		4.38891	25.4461	3.16833	0	0.830749	1.84815	0.43229	3.11119				2.56775	0.543439
Subsolidus	2.8	22.8	1.70662	0	0.447483	1.65596	0.275789	2.37924		2.56264	20.154	0.491032	0	0.128751	1.46379	0.252409	1.84495		3.03736	25.446	2.9222	0	0.766214	1.84814	0.299168	2.91352				2.37924	0.534288
Subsolidus	3.9	28.1	1.75274	0	0.459577	2.0409	0.384134	2.88461		3.61101	25.0451	0.370872	0	0.0972444	1.81903	0.35567	2.27194		4.18899	31.1549	3.13461	0	0.821909	2.26278	0.412599	3.49729				2.88461	0.612674
Subsolidus	1.6	15.2	1.61437	0	0.423294	1.10398	0.157594	1.68486		1.42868	13.1894	0.647802	0	0.169857	0.957944	0.14072	1.26852		1.77132	17.2106	2.58093	0	0.676732	1.25001	0.174468	2.10121				1.68486	0.416344
Subsolidus	3.9	24.3	2.58299	0	0.677271	1.76491	0.384134	2.82631		3.61613	21.5353	1.29643	0	0.339929	1.56411	0.356175	2.26022		4.18387	27.0647	3.86955	0	1.01461	1.96571	0.412094	3.39241				2.82631	0.566099
Subsolidus	4.7	34.2	2.76749	0	0.725647	2.48395	0.462931	3.67252		4.37362	30.7092	1.1942	0	0.313124	2.23041	0.430784	2.97432		5.02638	37.6908	4.34077	0	1.13817	2.73748	0.495079	4.37073				3.67252	0.698206
Subsolidus	4.8	33	2.58299	0	0.677271	2.39679	0.472781	3.54684		4.47207	29.592	1.04413	0	0.273777	2.14927	0.440481	2.86353		5.12793	36.408	4.12184	0	1.08076	2.64431	0.505081	4.23016				3.54684	0.683316
Subsolidus	3.7	27.7	1.61437	0	0.423294	2.01185	0.364435	2.79958		3.41917	24.675	0.247925	0	0.065007	1.79215	0.336775	2.19393		3.98083	30.725	2.98081	0	0.781582	2.23156	0.392096	3.40523				2.79958	0.605653
Subsolidus	3.8	29	1.42987	0	0.374918	2.10627	0.374285	2.85547		3.51354	25.8785	0.0282724	0	0.00741316	1.87956	0.34607	2.23304		4.08646	32.1215	2.83146	0	0.742422	2.33298	0.4025	3.47791				2.85547	0.622435
Subsolidus	3.2	22.6	1.66049	0	0.435388	1.64144	0.315187	2.39201		2.94659	19.97	0.44854	0	0.117609	1.45042	0.290227	1.85826		3.45341	25.23	2.87244	0	0.753168	1.83246	0.340147	2.92577				2.39201	0.533758
Subsolidus	3.3	23.4	1.79887	0	0.471671	1.69954	0.325037	2.49625		3.04124	20.7063	0.559288	0	0.146648	1.5039	0.29955	1.9501		3.55876	26.0937	3.03844	0	0.796694	1.89519	0.350524	3.0424				2.49625	0.546154
Subsolidus	3.6	20.1	1.42987	0	0.374918	1.45986	0.354586	2.18937		3.33438	17.673	0.295352	0	0.0774426	1.28359	0.328424	1.68946		3.86562	22.527	2.56438	0	0.672393	1.63613	0.380748	2.68927				2.18937	0.499907
Subsolidus	3.3	21.3	2.62911	0	0.689365	1.54702	0.325037	2.56142		3.04395	18.7747	1.4359	0	0.376501	1.36361	0.299817	2.03993		3.55605	23.8253	3.82232	0	1.00223	1.73043	0.350256	3.08291				2.56142	0.521494
Subsolidus	2.3	21.2	1.75274	0	0.459577	1.53976	0.226541	2.22587		2.08647	18.683	0.589144	0	0.154476	1.35695	0.205509	1.71693		2.51353	23.717	2.91634	0	0.764677	1.72257	0.247573	2.73482				2.22587	0.508942
Subsolidus	2.4	24.1	1.38374	0	0.362824	1.75038	0.23639	2.3496		2.17725	21.3512	0.137875	0	0.0361514	1.55074	0.21445	1.80134		2.62275	26.8488	2.62961	0	0.689496	1.95003	0.258331	2.89786				2.3496	0.548259
Subsolidus	2.1	16.4	1.70662	0	0.447483	1.19113	0.206842	1.84546		1.90376	14.2852	0.695573	0	0.182382	1.03753	0.187512	1.40743		2.29624	18.5148	2.71766	0	0.712583	1.34473	0.226171	2.28348				1.84546	0.438029
Subsolidus	2	19.9	2.07561	0	0.544235	1.44534	0.196992	2.18656		1.80156	17.4896	0.947732	0	0.2485	1.27027	0.177447	1.69622		2.19844	22.3104	3.2035	0	0.839971	1.6204	0.216537	2.67691				2.18656	0.490345
Subsolidus	3.2	28.6	1.75274	0	0.459577	2.07722	0.315187	2.85198		2.93688	25.508	0.361811	0	0.0948684	1.85265	0.289271	2.23679		3.46312	31.692	3.14367	0	0.824285	2.30179	0.341104	3.46718				2.85198	0.615194
Subsolidus	2.9	25.3	2.62911	0	0.689365	1.83754	0.285638	2.81254		2.65376	22.4576	1.3203	0	0.346189	1.6311	0.261385	2.23867		3.14624	28.1424	3.93792	0	1.03254	2.04398	0.309892	3.38641				2.81254	0.573871
Subsolidus	3.3	27.2	2.44461	0	0.640988	1.97554	0.325037	2.94156		3.03485	24.2126	1.08103	0	0.28345	1.75856	0.298921	2.34093		3.56515	30.1874	3.8082	0	0.998527	2.19251	0.351153	3.54219				2.94156	0.600632
Subsolidus	3.2	22.9	2.81361	0	0.737741	1.66323	0.315187	2.71616		2.94543	20.246	1.56951	0	0.411533	1.47046	0.290113	2.17211		3.45457	25.554	4.05771	0	1.06395	1.85599	0.340262	3.2602				2.71616	0.544046
Subsolidus	2.9	20.1	2.30624	0	0.604706	1.45986	0.285638	2.35021		2.66246	17.673	1.15984	0	0.304115	1.28359	0.262242	1.84995		3.13754	22.527	3.45264	0	0.905297	1.63613	0.309035	2.85046				2.35021	0.500257
Subsolidus	3	24.5	2.07561	0	0.544235	1.77944	0.295488	2.61916		2.75139	21.7198	0.800336	0	0.209852	1.57751	0.271001	2.05836		3.24861	27.2802	3.35089	0	0.878619	1.98136	0.319975	3.17996				2.61916	0.560798
Subsolidus	2.4	20.6	1.89112	0	0.495859	1.49618	0.23639	2.22843		2.18314	18.132	0.742372	0	0.194653	1.31693	0.215031	1.72661		2.61686	23.068	3.03986	0	0.797065	1.67543	0.25775	2.73024				2.22843	0.501817
Subsolidus	2.9	26.5	1.84499	0	0.483765	1.9247	0.285638	2.6941		2.65222	23.5656	0.515651	0	0.135206	1.71157	0.261233	2.10801		3.14778	29.4344	3.17433	0	0.832324	2.13782	0.310044	3.28019				2.6941	0.586088
Subsolidus	3	25.9	2.26011	0	0.592612	1.88112	0.295488	2.76922		2.74896	23.0114	0.940032	0	0.246481	1.67132	0.270761	2.18856		3.25104	28.7886	3.58019	0	0.938743	2.09091	0.320215	3.34987				2.76922	0.580654
Subsolidus	2.8	24.5	1.89112	0	0.495859	1.77944	0.275789	2.55108		2.55965	21.7198	0.620878	0	0.162797	1.57751	0.252115	1.99242		3.04035	27.2802	3.16135	0	0.828921	1.98136	0.299462	3.10974				2.55108	0.55866
Subsolidus	2.7	22.2	2.44461	0	0.640988	1.61239	0.265939	2.51931		2.46732	19.602	1.23324	0	0.323361	1.4237	0.243021	1.99008		2.93268	24.798	3.65599	0	0.958616	1.80108	0.288857	3.04855				2.51931	0.529236
Subsolidus	2.2	17.9	2.35236	0	0.6168	1.30008	0.216691	2.13357		1.99621	15.657	1.2786	0	0.335255	1.13717	0.196619	1.66904		2.40379	20.143	3.42613	0	0.898346	1.46299	0.236764	2.5981				2.13357	0.464529
Subsolidus	2.9	19.3	1.66049	0	0.435388	1.40176	0.285638	2.12279		2.66414	16.9394	0.552463	0	0.144858	1.23031	0.262407	1.63757		3.13586	21.6606	2.76852	0	0.725919	1.57321	0.30887	2.608				2.12279	0.485212
Subsolidus	2.8	20.1	2.53686	0	0.665177	1.45986	0.275789	2.40083		2.56652	17.673	1.38628	0	0.363488	1.28359	0.252792	1.89987		3.03348	22.527	3.68745	0	0.966866	1.63613	0.298786	2.90178				2.40083	0.500956
Subsolidus	2.9	24.7	5.0276	0	1.31826	1.79396	0.285638	3.39786		2.65348	21.9041	3.68421	0	0.966017	1.59089	0.261357	2.81827		3.14652	27.4959	6.37099	0	1.6705	1.99703	0.309919	3.97745				3.39786	0.579592
Subsolidus	3.1	22.5	5.16597	0	1.35454	1.63417	0.305338	3.29405		2.84889	19.8778	3.88026	0	1.01742	1.44372	0.280605	2.74175		3.35111	25.1222	6.45169	0	1.69166	1.82463	0.330071	3.84636				3.29405	0.552303
Subsolidus	3.3	21.7	6.22684	0	1.63271	1.57607	0.325037	3.53381		3.04169	19.1421	4.93488	0	1.29395	1.39029	0.299594	2.98384		3.55831	24.2579	7.51881	0	1.97146	1.76185	0.35048	4.08379				3.53381	0.549979
Subsolidus	3.1	21.9	5.62722	0	1.47548	1.5906	0.305338	3.37142		2.84965	19.326	4.34691	0	1.13978	1.40365	0.280679	2.82411		3.35035	24.474	6.90753	0	1.81119	1.77755	0.329996	3.91873				3.37142	0.54731
Subsolidus	2.8	21.3	4.88922	0	1.28198	1.54702	0.275789	3.10478		2.56324	18.7747	3.64726	0	0.956327	1.3636	0.252469	2.5724		3.03676	23.8253	6.13119	0	1.60763	1.73043	0.299108	3.63717				3.10478	0.532385
Subsolidus	2.6	27.4	3.27486	0	0.858683	1.99006	0.25609	3.10483		2.36183	24.3975	1.89474	0	0.496809	1.77199	0.232631	2.50143		2.83817	30.4025	4.65498	0	1.22056	2.20813	0.279548	3.70824				3.10483	0.603403
Subsolidus	2.6	22.3	3.36711	0	0.882871	1.61965	0.25609	2.75861		2.37074	19.694	2.13363	0	0.559447	1.43037	0.233509	2.22333		2.82926	24.906	4.60059	0	1.2063	1.80893	0.27867	3.29389				2.75861	0.535281
Subsolidus	3.8	29.5	2.90586	0	0.76193	2.14259	0.374285	3.2788		3.51199	26.3418	1.46471	0	0.384054	1.9132	0.345917	2.64317		4.08801	32.6582	4.34701	0	1.1398	2.37197	0.402652	3.91443				3.2788	0.635626
Subsolidus	2.4	27.1	2.02949	0	0.532141	1.96827	0.23639	2.7368		2.17127	24.1202	0.682915	0	0.179063	1.75185	0.213861	2.14477		2.62873	30.0798	3.37606	0	0.885219	2.1847	0.25892	3.32884				2.7368	0.592031
Subsolidus	4.3	32.5	4.8431	0	1.26988	2.36048	0.423533	4.05389		3.98875	29.1269	3.2797	0	0.859953	2.11549	0.392876	3.36831		4.61125	35.8731	6.4065	0	1.67981	2.60546	0.45419	4.73947				4.05389	0.685577
Subsolidus	4.3	30.7	4.38185	0	1.14894	2.22974	0.423533	3.80222		3.99153	27.4547	2.87578	0	0.754042	1.99403	0.393149	3.14122		4.60847	33.9453	5.88793	0	1.54384	2.46545	0.453916	4.46321				3.80222	0.660992
Subsolidus	3.8	31.7	2.49074	0	0.653083	2.30237	0.374285	3.32974		3.50884	28.3834	0.995901	0	0.26113	2.06149	0.345606	2.66822		4.09116	35.0166	3.98557	0	1.04504	2.54326	0.402963	3.99125				3.32974	0.661517
Subsolidus	4.2	32	2.30624	0	0.604706	2.32416	0.413683	3.34255		3.89409	28.6622	0.803394	0	0.210653	2.08173	0.383553	2.67594		4.50591	35.3378	3.80908	0	0.998759	2.56659	0.443814	4.00916				3.34255	0.666611
Subsolidus	4.8	31.7	2.81361	0	0.737741	2.30237	0.472781	3.51289		4.47376	28.3833	1.30606	0	0.342454	2.06148	0.440647	2.84458		5.12624	35.0167	4.32116	0	1.13303	2.54326	0.504914	4.1812				3.51289	0.668312
Subsolidus	3.9	27.8	2.85974	0	0.749836	2.01911	0.384134	3.15308		3.61087	24.7674	1.46663	0	0.384557	1.79886	0.355656	2.53907		4.18913	30.8326	4.25284	0	1.11511	2.23937	0.412612	3.76709				3.15308	0.614011
Subsolidus	4	28.8	2.02949	0	0.532141	2.09174	0.393984	3.01787		3.70614	25.6932	0.622122	0	0.163123	1.8661	0.36504	2.39426		4.29386	31.9068	3.43686	0	0.90116	2.31739	0.422928	3.64148				3.01787	0.62361
Subsolidus	4.5	33.2	2.99811	0	0.786118	2.41132	0.443232	3.64067		4.18163	29.7781	1.44897	0	0.379927	2.16278	0.411874	2.95459		4.81837	36.6219	4.54725	0	1.19231	2.65985	0.47459	4.32675				3.64067	0.68608
Subsolidus	4.1	35.3	3.18261	0	0.834494	2.56384	0.403834	3.80217		3.79228	31.7346	1.5775	0	0.413628	2.30489	0.373525	3.09204		4.40772	38.8654	4.78772	0	1.25536	2.82279	0.434142	4.5123				3.80217	0.710129
Subsolidus	3.40887	26.122	7.37477	0	1.9337	1.89724	0.33576	4.1667		3.13923	23.2163	5.93077	0	1.55507	1.6862	0.309201	3.55047		3.67851	29.0278	8.81877	0	2.31232	2.10829	0.362318	4.78293				4.1667	0.616228
Subsolidus	3.25259	21.6391	8.56425	0	2.24558	1.57164	0.320367	4.1376		2.99587	19.0861	7.20922	0	1.89029	1.38622	0.295081	3.57159		3.50931	24.192	9.91928	0	2.60088	1.75707	0.345653	4.7036				4.1376	0.566003
Subsolidus	2.01211	18.1906	4.75791	0	1.24755	1.32118	0.198185	2.76691		1.81443	15.9229	3.6161	0	0.948157	1.15648	0.178714	2.28335		2.2098	20.4583	5.89973	0	1.54694	1.48589	0.217656	3.25048				2.76691	0.483565
Subsolidus	2.04141	29.3119	4.99581	0	1.30992	2.12892	0.201071	3.63992		1.82102	26.1674	3.53016	0	0.925624	1.90054	0.179363	3.00553		2.26181	32.4563	6.46146	0	1.69422	2.3573	0.222779	4.27431				3.63992	0.634389
Subsolidus	1.49443	17.8458	5.7095	0	1.49706	1.29614	0.147196	2.94039		1.31949	15.6072	4.5548	0	1.19429	1.13355	0.129965	2.4578		1.66937	20.0843	6.8642	0	1.79982	1.45872	0.164426	3.42297				2.94039	0.482585
Subsolidus	3.94608	20.1735	4.28212	0	1.12279	1.4652	0.388673	2.97666		3.66536	17.7402	3.07828	0	0.807139	1.28847	0.361024	2.45664		4.2268	22.6067	5.48597	0	1.43845	1.64192	0.416323	3.49669				2.97666	0.520027
Subsolidus	0.7521	5.86237	5.23371	0	1.3723	0.425784	0.0740788	1.87216		0.634565	4.7108	4.43232	0	1.16217	0.342145	0.0625022	1.56682		0.869635	7.01395	6.0351	0	1.58243	0.509423	0.0856555	2.17751				1.87216	0.305344
Subsolidus	3.0377	21.208	2.85475	0	0.748528	1.54034	0.299202	2.58807		2.79236	18.6902	1.66164	0	0.435691	1.35747	0.275037	2.0682		3.28304	23.7258	4.04785	0	1.06137	1.7232	0.323367	3.10793				2.58807	0.519869
Subsolidus	3.3991	32.0706	11.1811	0	2.93174	2.32929	0.334798	5.59582		3.12056	28.7277	9.48652	0	2.48741	2.08649	0.307362	4.88126		3.67764	35.4135	12.8757	0	3.37606	2.57209	0.362233	6.31038				5.59582	0.714559
Subsolidus	1.76792	15.4318	8.80214	0	2.30796	1.12081	0.174133	3.60291		1.58472	13.4006	7.61536	0	1.99678	0.973287	0.156088	3.12616		1.95113	17.463	9.98892	0	2.61914	1.26834	0.192178	4.07966				3.60291	0.476752
Subsolidus	2.75444	18.6217	7.85056	0	2.05845	1.35249	0.271302	3.68224		2.52294	16.3175	6.60168	0	1.73099	1.18514	0.2485	3.16463		2.98594	20.9258	9.09944	0	2.38591	1.51984	0.294104	4.19986				3.68224	0.517615
Subsolidus	2.11955	22.3287	3.33054	0	0.873283	1.62174	0.208768	2.70379		1.91051	19.7204	2.10062	0	0.550793	1.4323	0.188177	2.17127		2.3286	24.937	4.56046	0	1.19577	1.81118	0.229358	3.23631				2.70379	0.532521
Subsolidus	2.26607	16.3802	7.61266	0	1.99607	1.18969	0.223199	3.40896		2.05925	14.2667	6.43579	0	1.68749	1.03619	0.202828	2.92651		2.47288	18.4936	8.78954	0	2.30466	1.34319	0.243569	3.89142				3.40896	0.482451
Subsolidus	3.61399	22.9322	4.04423	0	1.06041	1.66557	0.355963	3.08195		3.34232	20.2755	2.7687	0	0.725966	1.47261	0.329205	2.52778		3.88566	25.5889	5.31975	0	1.39486	1.85852	0.382722	3.63611				3.08195	0.554164
Subsolidus	3.51631	25.9496	8.56425	0	2.24558	1.88472	0.346343	4.47665		3.24268	23.057	7.09298	0	1.85981	1.67463	0.319391	3.85383		3.78994	28.8422	10.0355	0	2.63136	2.09481	0.373294	5.09946				4.47665	0.622813
Subsolidus	2.79351	21.2942	2.85475	0	0.748528	1.5466	0.27515	2.57028		2.55817	18.7694	1.6611	0	0.435547	1.36322	0.251969	2.05074		3.02886	23.819	4.0484	0	1.06151	1.72997	0.298331	3.08981				2.57028	0.519536
Subsolidus	3.06701	25.4323	8.08846	0	2.12083	1.84715	0.302088	4.27007		2.81177	22.5796	6.64676	0	1.74281	1.63995	0.276948	3.65971		3.32224	28.2851	9.53015	0	2.49885	2.05435	0.327227	4.88043				4.27007	0.610357
Subsolidus	2.92049	23.4495	7.61266	0	1.99607	1.70314	0.287657	3.98687		2.67443	20.7517	6.23813	0	1.63567	1.50719	0.26342	3.40628		3.16656	26.1473	8.9872	0	2.35648	1.89908	0.311893	4.56746				3.98687	0.580589
Subsolidus	6.11	32.47	1.94647	0	0.510372	2.3583	0.601811	3.47048		5.7434	29.099	0.423223	0	0.110971	2.11346	0.565702	2.79013		6.4766	35.841	3.46971	0	0.909773	2.60313	0.637919	4.15082				3.47048	0.680346
Subsolidus	5.68	28.33	5.26745	0	1.38115	2.05761	0.559457	3.99821		5.32956	25.2577	3.79713	0	0.995625	1.83447	0.52494	3.35503		6.03044	31.4023	6.73776	0	1.76667	2.28075	0.593974	4.64139				3.99821	0.64318
Subsolidus	5.48	24.1	7.14473	0	1.87338	1.75038	0.539758	4.16352		5.14035	21.3507	5.74546	0	1.50648	1.5507	0.506304	3.56349		5.81965	26.8493	8.54399	0	2.24027	1.95006	0.573212	4.76355				4.16352	0.60003
Subsolidus	3.12	13.85	2.91509	0	0.764349	1.00593	0.307308	2.07758		2.88181	11.958	1.94301	0	0.509467	0.868509	0.283847	1.66182		3.35819	15.742	3.88716	0	1.01923	1.14334	0.330768	2.49334				2.07758	0.415759
Subsolidus	4.89	24.71	3.39478	0	0.890127	1.79469	0.481645	3.16646		4.56982	21.9132	2.07158	0	0.543177	1.59156	0.450109	2.58484		5.21018	27.5068	4.71799	0	1.23708	1.99782	0.513182	3.74808				3.16646	0.581618
Subsolidus	5.09	25.09	1.5544	0	0.407572	1.82229	0.501345	2.7312		4.76354	22.2638	0.253953	0	0.0665877	1.61702	0.46919	2.1528		5.41646	27.9162	2.85486	0	0.748556	2.02756	0.533499	3.30961				2.7312	0.578408
Subsolidus	5.57	27.9	2.41694	0	0.633732	2.02638	0.548623	3.20873		5.22446	24.8599	1.01631	0	0.266481	1.80557	0.514589	2.58664		5.91554	30.9401	3.81756	0	1.00098	2.24718	0.582657	3.83082				3.20873	0.622089
Subsolidus	5.84	35.48	1.94647	0	0.510372	2.57691	0.575217	3.6625		5.47717	31.9025	0.344718	0	0.0903866	2.31708	0.53948	2.94694		6.20283	39.0575	3.54821	0	0.930357	2.83675	0.610954	4.37806				3.6625	0.715558
Subsolidus	6.13	33.27	3.54238	0	0.928829	2.4164	0.60378	3.94901		5.76123	29.8431	1.97083	0	0.51676	2.16751	0.567458	3.25173		6.49877	36.6969	5.11393	0	1.3409	2.66529	0.640103	4.64629				3.94901	0.697283
Subsolidus	4.88	25.36	1.63743	0	0.429341	1.8419	0.48066	2.7519		4.56014	22.5129	0.329314	0	0.0863477	1.63511	0.449156	2.17061		5.19986	28.2071	2.94554	0	0.772335	2.04868	0.512165	3.33318				2.7519	0.581284
Subsolidus	2.54	14.14	1.75735	0	0.460786	1.02699	0.25018	1.73795		2.32759	12.2225	0.812366	0	0.213006	0.887717	0.229258	1.32998		2.75241	16.0575	2.70234	0	0.708566	1.16626	0.271102	2.14593				1.73795	0.407973
Subsolidus	2.6	14.44	0.797958	0	0.209228	1.04878	0.25609	1.5141		2.38517	12.496	-0.134625	0	-0.0352993	0.907587	0.234929	1.10722		2.81483	16.384	1.73054	0	0.453756	1.18997	0.27725	1.92097				1.5141	0.406878
Subsolidus	3.85	21.01	1.93263	0	0.506744	1.52596	0.37921	2.41191		3.57304	18.5083	0.757861	0	0.198715	1.34426	0.35193	1.89491		4.12696	23.5117	3.10739	0	0.814773	1.70765	0.40649	2.92891				2.41191	0.517004
Subsolidus	5.26	26.12	1.32378	0	0.347101	1.8971	0.518089	2.76229		4.92685	23.2145	-0.0042874	0	-0.00112418	1.68607	0.485275	2.17022		5.59315	29.0255	2.65185	0	0.695327	2.10812	0.550903	3.35435				2.76229	0.592068
Subsolidus	6.36	32.8	3.22412	0	0.845379	2.38226	0.626435	3.85408		5.98577	29.4058	1.66919	0	0.437668	2.13575	0.589574	3.16299		6.73423	36.1942	4.77906	0	1.25309	2.62878	0.663295	4.54517				3.85408	0.69109
Subsolidus	6.71	38.69	2.06178	0	0.540607	2.81005	0.660908	4.01157		6.32028	34.9021	0.370816	0	0.0972295	2.53494	0.622522	3.25469		7.09972	42.4779	3.75274	0	0.983985	3.08517	0.699294	4.76845				4.01157	0.756876
Subsolidus	5.43	27.37	2.59221	0	0.67969	1.98788	0.534833	3.20241		5.08934	24.3696	1.20448	0	0.31582	1.76996	0.50128	2.58706		5.77066	30.3704	3.97994	0	1.04356	2.2058	0.568387	3.81775				3.20241	0.615342
Subsolidus	4.53	24.5	2.80439	0	0.735323	1.77944	0.446187	2.96094		4.22276	21.7196	1.50231	0	0.393912	1.5775	0.415925	2.38733		4.83724	27.2804	4.10646	0	1.07673	1.98137	0.476449	3.53456				2.96094	0.573611
Subsolidus	4.15	20.56	4.01285	0	1.05219	1.49327	0.408758	2.95422		3.86119	18.095	2.8025	0	0.734828	1.31424	0.380312	2.42938		4.43881	23.025	5.22321	0	1.36955	1.67231	0.437205	3.47906				2.95422	0.524841
Subsolidus	4.51	14.22	2.82745	0	0.74137	1.0328	0.444217	2.21839		4.21598	12.2951	1.83156	0	0.480243	0.892992	0.415258	1.78849		4.80402	16.1449	3.82334	0	1.0025	1.17261	0.473176	2.64828				2.21839	0.429892
Subsolidus	4.18	21.61	1.56824	0	0.4112	1.56953	0.411713	2.39245		3.88992	19.0596	0.379464	0	0.0994973	1.3843	0.383141	1.86694		4.47008	24.1604	2.75702	0	0.722903	1.75477	0.440285	2.91796				2.39245	0.525512
Subsolidus	4.48	20.03	1.96491	0	0.51521	1.45478	0.441262	2.41125		4.18075	17.6087	0.813405	0	0.213279	1.27892	0.411787	1.90399		4.77925	22.4513	3.11642	0	0.817141	1.63064	0.470737	2.91852				2.41125	0.507265
Subsolidus	3.33	20.2	0.848696	0	0.222532	1.46713	0.327992	2.01765		3.07546	17.7649	-0.275239	0	-0.072169	1.29026	0.30292	1.52101		3.58454	22.6351	1.97263	0	0.517233	1.64399	0.353063	2.51429				2.01765	0.496637
Subsolidus	4.6	22.59	1.08393	0	0.284212	1.64071	0.453082	2.37801		4.29366	19.9607	-0.12938	0	-0.0339241	1.44975	0.422908	1.83873		4.90634	25.2193	2.29724	0	0.602348	1.83168	0.483255	2.91728				2.37801	0.539276
Subsolidus	4.76	23.27	1.30994	0	0.343473	1.6901	0.468841	2.50241		4.44709	20.5865	0.07069	0	0.0185352	1.4952	0.43802	1.95175		5.07291	25.9535	2.5492	0	0.668411	1.885	0.499662	3.05307				2.50241	0.550661
Subsolidus	4.25	19.55	2.64756	0	0.694203	1.41992	0.418608	2.53273		3.95943	17.1684	1.49799	0	0.392778	1.24694	0.389988	2.02971		4.54057	21.9316	3.79714	0	0.995627	1.59289	0.447228	3.03575				2.53273	0.503018
Subsolidus	4.08	23.56	1.05626	0	0.276955	1.71116	0.401864	2.38998		3.79126	20.8536	-0.181315	0	-0.0475415	1.5146	0.373424	1.84048		4.36874	26.2664	2.29383	0	0.601452	1.90773	0.430304	2.93948				2.38998	0.549502
Subsolidus	4.89	24.87	2.09868	0	0.550283	1.80631	0.481645	2.83824		4.57021	22.0608	0.796473	0	0.208839	1.60228	0.450148	2.26126		5.20979	27.6792	3.40088	0	0.891726	2.01034	0.513143	3.41521				2.83824	0.576972
Subsolidus	4.51	23.25	1.21308	0	0.318075	1.68865	0.444217	2.45094		4.20592	20.5681	-0.0216583	0	-0.00567891	1.49386	0.414267	1.90245		4.81408	25.9319	2.44782	0	0.64183	1.88343	0.474167	2.99943				2.45094	0.54849
Subsolidus	3.48	20.53	1.45293	0	0.380965	1.49109	0.342766	2.21482		3.21855	18.0677	0.30581	0	0.0801847	1.31226	0.317014	1.70945		3.74145	22.9923	2.60005	0	0.681745	1.66993	0.368518	2.7202				2.21482	0.505371
Subsolidus	3.73	20.51	1.78964	0	0.469252	1.48964	0.36739	2.32628		3.45847	18.0493	0.634107	0	0.166266	1.31092	0.340646	1.81783		4.00153	22.9707	2.94517	0	0.772238	1.66836	0.394134	2.83474				2.32628	0.508453
Suprasolidus	3.8	27.7	2.58299	0	0.677271	2.01185	0.374285	3.06341		3.51489	24.6749	1.19867	0	0.314295	1.79214	0.346202	2.45264		4.08511	30.7251	3.96731	0	1.04025	2.23156	0.402367	3.67417				3.06341	0.610768
Suprasolidus	4.2	30.6	2.53686	0	0.665177	2.22248	0.413683	3.30134		3.89603	27.362	1.0687	0	0.280218	1.9873	0.383743	2.65126		4.50397	33.838	4.00502	0	1.05014	2.45766	0.443623	3.95142				3.30134	0.650078
Suprasolidus	4.1	29.5	3.55161	0	0.931247	2.14259	0.403834	3.47767		3.80073	26.3417	2.09611	0	0.54961	1.9132	0.374356	2.83716		4.39927	32.6583	5.0071	0	1.31288	2.37197	0.433311	4.11817				3.47767	0.640502
Suprasolidus	4.9	34.9	3.50548	0	0.919153	2.53479	0.48263	3.93657		4.56579	31.3616	1.8999	0	0.498163	2.27779	0.449712	3.22566		5.23421	38.4384	5.11106	0	1.34014	2.79178	0.515549	4.64748				3.93657	0.710906
Suprasolidus	3.7	27.1	2.44461	0	0.640988	1.96827	0.364435	2.9737		3.41963	24.1201	1.08083	0	0.283399	1.75184	0.33682	2.37206		3.98037	30.0799	3.80839	0	0.998578	2.1847	0.392051	3.57533				2.9737	0.601637
Suprasolidus	3.7	26.8	2.02949	0	0.532141	1.94648	0.364435	2.84306		3.42031	23.8428	0.681935	0	0.178806	1.7317	0.336887	2.2474		3.97969	29.7572	3.37704	0	0.885476	2.16127	0.391983	3.43873				2.84306	0.595666
Suprasolidus	4	26.3	2.58299	0	0.677271	1.91017	0.393984	2.98142		3.70952	23.3808	1.23733	0	0.324433	1.69814	0.365372	2.38795		4.29048	29.2192	3.92865	0	1.03011	2.12219	0.422596	3.5749				2.98142	0.593474
Suprasolidus	5	27.9	2.58299	0	0.677271	2.02638	0.49248	3.19613		4.67238	24.8599	1.18368	0	0.310367	1.80557	0.460211	2.57615		5.32762	30.9401	3.98229	0	1.04418	2.24718	0.524749	3.8161				3.19613	0.619975
Suprasolidus	3.8	30.1	2.81361	0	0.737741	2.18616	0.374285	3.29819		3.51112	26.8981	1.35739	0	0.355915	1.95361	0.345832	2.65535		4.08888	33.3019	4.26983	0	1.11957	2.41872	0.402738	3.94102				3.29819	0.642835
Suprasolidus	2.9	29.3	2.53686	0	0.665177	2.12806	0.285638	3.07887		2.64698	26.1565	1.11453	0	0.292235	1.89974	0.260717	2.4527		3.15302	32.4435	3.95919	0	1.03812	2.35637	0.31056	3.70505				3.07887	0.626178
Suprasolidus	3.2	31	2.58299	0	0.677271	2.25153	0.315187	3.24399		2.93242	27.7333	1.11013	0	0.291081	2.01427	0.288831	2.59418		3.46758	34.2667	4.05584	0	1.06346	2.48879	0.341543	3.89379				3.24399	0.649806
Suprasolidus	3.1	29.6	2.44461	0	0.640988	2.14985	0.305338	3.09617		2.8387	26.4345	1.01403	0	0.265884	1.91994	0.2796	2.46542		3.3613	32.7655	3.87519	0	1.01609	2.37976	0.331075	3.72692				3.09617	0.63075
Suprasolidus	2.8	28.6	2.85974	0	0.749836	2.07722	0.275789	3.10284		2.55196	25.508	1.45204	0	0.38073	1.85265	0.251358	2.48473		3.04804	31.692	4.26743	0	1.11894	2.30179	0.30022	3.72095				3.10284	0.618108
Suprasolidus	3.4	28.5	2.26011	0	0.592612	2.06996	0.334886	2.99745		3.129	25.4154	0.861813	0	0.225971	1.84592	0.308194	2.38009		3.671	31.5846	3.65841	0	0.959253	2.29399	0.361579	3.61482				2.99745	0.617368
Suprasolidus	3.2	30	2.44461	0	0.640988	2.1789	0.315187	3.13508		2.93416	26.8054	1.00207	0	0.262747	1.94688	0.289003	2.49863		3.46584	33.1946	3.88716	0	1.01923	2.41092	0.341372	3.77153				3.13508	0.636451
Suprasolidus	3	26.7	2.35236	0	0.6168	1.93922	0.295488	2.85151		2.74756	23.7504	1.00722	0	0.264098	1.72499	0.270624	2.25971		3.25244	29.6496	3.69751	0	0.969503	2.15345	0.320352	3.44331				2.85151	0.591796
Suprasolidus	3.4	35.4	3.22873	0	0.846589	2.5711	0.334886	3.75258		3.1173	31.8279	1.62486	0	0.426047	2.31166	0.307041	3.04475		3.6827	38.9721	4.8326	0	1.26713	2.83054	0.362732	4.4604				3.75258	0.707826
Suprasolidus	3.7	44	3.87448	0	1.01591	3.19572	0.364435	4.57606		3.39264	39.887	2.04605	0	0.536484	2.89699	0.334162	3.76764		4.00736	48.113	5.70291	0	1.49533	3.49445	0.394709	5.38448				4.57606	0.808423
Suprasolidus	2.6	33.8	2.62911	0	0.689365	2.45489	0.25609	3.40035		2.35059	30.3368	1.08288	0	0.283937	2.20336	0.231523	2.71882		2.84941	37.2632	4.17534	0	1.09479	2.70643	0.280656	4.08188				3.40035	0.681527
Suprasolidus	3.4	39.6	2.21399	0	0.580518	2.87615	0.334886	3.79155		3.11098	35.7546	0.518491	0	0.135951	2.59686	0.306419	3.03923		3.68902	43.4454	3.90949	0	1.02509	3.15544	0.363354	4.54388				3.79155	0.752327
Suprasolidus	2.9	31.7	2.39849	0	0.628894	2.30237	0.285638	3.2169		2.64289	28.3835	0.911463	0	0.23899	2.06149	0.260315	2.56079		3.15711	35.0165	3.88551	0	1.0188	2.54325	0.310962	3.87301				3.2169	0.656109
Suprasolidus	2.9	33.9	2.90586	0	0.76193	2.46216	0.285638	3.50973		2.63876	30.4299	1.35041	0	0.354084	2.21012	0.259907	2.82411		3.16124	37.3701	4.46131	0	1.16978	2.71419	0.31137	4.19534				3.50973	0.685611
Suprasolidus	3	32.5	2.21399	0	0.580518	2.36048	0.295488	3.23648		2.73776	29.1271	0.707342	0	0.185468	2.1155	0.269659	2.57063		3.26224	35.8729	3.72063	0	0.975567	2.60545	0.321317	3.90234				3.23648	0.665855
Suprasolidus	3.1	31.6	2.76749	0	0.725647	2.29511	0.305338	3.32609		2.83514	28.2905	1.27554	0	0.334451	2.05474	0.27925	2.66844		3.36486	34.9095	4.25944	0	1.11684	2.53548	0.331425	3.98374				3.32609	0.657651
Suprasolidus	3.5	41.6	2.85974	0	0.749836	3.02141	0.344736	4.11598		3.20386	37.6306	1.10489	0	0.289707	2.73311	0.315567	3.33838		3.79614	45.5694	4.61458	0	1.20996	3.30971	0.373905	4.89358				4.11598	0.777597
Suprasolidus	2.6	32.3	2.30624	0	0.604706	2.34595	0.25609	3.20674		2.35353	28.9411	0.806184	0	0.211385	2.10199	0.231813	2.54519		2.84647	35.6589	3.80629	0	0.998027	2.5899	0.280366	3.8683				3.20674	0.661553
Suprasolidus	3.4	32.9	2.49074	0	0.653083	2.38953	0.334886	3.3775		3.12176	29.4991	0.965914	0	0.253267	2.14252	0.307481	2.70327		3.67824	36.3009	4.01556	0	1.0529	2.63654	0.362292	4.05173				3.3775	0.674231
Suprasolidus	3.3	36.7	2.72136	0	0.713553	2.66552	0.325037	3.70411		3.01911	33.0415	1.09263	0	0.286492	2.3998	0.29737	2.98366		3.58089	40.3585	4.35009	0	1.14061	2.93124	0.352703	4.42456				3.70411	0.720448
Suprasolidus	3.5	39.1	2.58299	0	0.677271	2.83983	0.344736	3.86184		3.208	35.2862	0.893937	0	0.234394	2.56284	0.315975	3.1132		3.792	42.9138	4.27204	0	1.12015	3.11683	0.373497	4.61047				3.86184	0.748635
Suprasolidus	3.2	30.4	2.53686	0	0.665177	2.20795	0.315187	3.18832		2.93344	27.1764	1.08151	0	0.283576	1.97382	0.288932	2.54633		3.46656	33.6236	3.99222	0	1.04678	2.44208	0.341442	3.8303				3.18832	0.641984
Suprasolidus	3.3	31.2	2.76749	0	0.725647	2.26606	0.325037	3.31674		3.02816	27.919	1.28518	0	0.336979	2.02776	0.298262	2.663		3.57184	34.481	4.24979	0	1.11432	2.50436	0.351812	3.97048				3.31674	0.653743
Suprasolidus	4	32.4	2.85974	0	0.749836	2.35321	0.393984	3.49703		3.70034	29.034	1.33806	0	0.350845	2.10874	0.364468	2.82405		4.29966	35.766	4.38141	0	1.14883	2.59769	0.4235	4.17001				3.49703	0.672979
Suprasolidus	3.5	34.6	1.75274	0	0.459577	2.513	0.344736	3.31731		3.21569	31.0821	0.193014	0	0.0506091	2.25749	0.316733	2.62483		3.78431	38.1179	3.31247	0	0.868544	2.76851	0.372739	4.00979				3.31731	0.692479
Suprasolidus	3	33.3	2.16786	0	0.568424	2.41858	0.295488	3.28249		2.73641	29.8713	0.640127	0	0.167844	2.16955	0.269525	2.60692		3.26359	36.7287	3.6956	0	0.969003	2.6676	0.321451	3.95806				3.28249	0.675568
Suprasolidus	3	23.8	2.30624	0	0.604706	1.72859	0.295488	2.62879		2.75239	21.0747	1.04733	0	0.274614	1.53065	0.2711	2.07637		3.24761	26.5253	3.56515	0	0.934799	1.92653	0.319876	3.18121				2.62879	0.55242
Suprasolidus	3.1	30	2.44461	0	0.640988	2.1789	0.305338	3.12523		2.83803	26.8054	1.00278	0	0.262932	1.94688	0.279534	2.48934		3.36197	33.1946	3.88645	0	1.01904	2.41092	0.331141	3.76111				3.12523	0.635883
Suprasolidus	3	33.1	3.45936	0	0.907059	2.40405	0.295488	3.6066		2.73603	29.6851	1.91504	0	0.502133	2.15603	0.269488	2.92765		3.26397	36.5149	5.00367	0	1.31199	2.65207	0.321488	4.28555				3.6066	0.678948
Suprasolidus	3.2	37.1	2.44461	0	0.640988	2.69457	0.315187	3.65075		2.92228	33.4152	0.8105	0	0.212517	2.42695	0.287833	2.9273		3.47772	40.7848	4.07872	0	1.06946	2.9622	0.342541	4.3742				3.65075	0.723453
Suprasolidus	4	37.7	2.67524	0	0.701459	2.73815	0.393984	3.83359		3.6924	33.976	1.01703	0	0.266669	2.46768	0.363687	3.09803		4.3076	41.424	4.33344	0	1.13625	3.00862	0.424281	4.56915				3.83359	0.735559
Suprasolidus	3.1	34.2	3.55161	0	0.931247	2.48395	0.305338	3.72053		2.83031	30.7093	1.97566	0	0.518028	2.23042	0.278775	3.02722		3.36969	37.6907	5.12755	0	1.34447	2.73748	0.331901	4.41384				3.72053	0.693313
Suprasolidus	2.5	29.5	2.21399	0	0.580518	2.14259	0.24624	2.96934		2.26267	26.3419	0.794407	0	0.208297	1.91321	0.222864	2.34437		2.73733	32.6581	3.63357	0	0.952739	2.37196	0.269616	3.59431				2.96934	0.624972
Suprasolidus	3	34	2.95198	0	0.774024	2.46942	0.295488	3.53893		2.73476	30.523	1.39243	0	0.365102	2.21689	0.269363	2.85135		3.26524	37.477	4.51154	0	1.18295	2.72195	0.321613	4.22651				3.53893	0.68758
Suprasolidus	3	32.2	2.62911	0	0.689365	2.33869	0.295488	3.32354		2.73804	28.8481	1.12376	0	0.294654	2.09524	0.269686	2.65958		3.26196	35.5519	4.13447	0	1.08408	2.58213	0.32129	3.9875				3.32354	0.663961
Suprasolidus	4	41	3.68998	0	0.96753	2.97783	0.393984	4.33934		3.68695	37.0673	1.9337	0	0.507026	2.6922	0.36315	3.56237		4.31305	44.9327	5.44626	0	1.42803	3.26346	0.424818	5.11632				4.33934	0.776971
Suprasolidus	4.9	45	4.33573	0	1.13685	3.26835	0.48263	4.88783		4.55161	40.8288	2.47008	0	0.647666	2.9654	0.448315	4.06138		5.24839	49.1712	6.20138	0	1.62603	3.5713	0.516945	5.71428				4.88783	0.826448
Suprasolidus	3.2	34.8	3.41323	0	0.894965	2.52752	0.315187	3.73768		2.92562	31.2684	1.82324	0	0.478061	2.27103	0.288162	3.03725		3.47438	38.3316	5.00323	0	1.31187	2.78402	0.342213	4.4381				3.73768	0.700427
Suprasolidus	3.2	38.2	3.36711	0	0.882871	2.77447	0.315187	3.97252		2.91996	34.4437	1.6902	0	0.443177	2.50165	0.287604	3.23243		3.48004	41.9563	5.04402	0	1.32256	3.04728	0.34277	4.71262				3.97252	0.740095
Suprasolidus	4.1	44.9	2.30624	0	0.604706	3.26109	0.403834	4.26963		3.7784	40.7347	0.477679	0	0.125249	2.95856	0.372157	3.45597		4.4216	49.0653	4.1348	0	1.08416	3.56361	0.43551	5.08328				4.26963	0.813658
Suprasolidus	3.2	30.8	2.67524	0	0.701459	2.237	0.315187	3.25365		2.9327	27.5476	1.20632	0	0.316302	2.00078	0.288859	2.60595		3.4673	34.0524	4.14415	0	1.08662	2.47322	0.341515	3.90136				3.25365	0.647705
Suprasolidus	3.2	34.6	2.35236	0	0.6168	2.513	0.315187	3.44499		2.92652	31.0821	0.785357	0	0.205924	2.25749	0.288251	2.75166		3.47348	38.1179	3.91937	0	1.02768	2.76851	0.342124	4.13831				3.44499	0.693321
Suprasolidus	3.2	34.9	2.44461	0	0.640988	2.53479	0.315187	3.49096		2.92597	31.3617	0.868148	0	0.227632	2.2778	0.288196	2.79363		3.47403	38.4383	4.02108	0	1.05434	2.79177	0.342178	4.1883				3.49096	0.697334
Suprasolidus	3.4	36.1	2.95198	0	0.774024	2.62194	0.334886	3.73085		3.1163	32.4812	1.33446	0	0.349902	2.35911	0.306943	3.01595		3.6837	39.7188	4.56951	0	1.19815	2.88478	0.36283	4.44575				3.73085	0.714902
Suprasolidus	3.7	38.5	2.76749	0	0.725647	2.79626	0.364435	3.88634		3.4017	34.7244	1.08946	0	0.285662	2.52204	0.335054	3.14275		3.9983	42.2756	4.44551	0	1.16563	3.07047	0.393816	4.62992				3.88634	0.743585
Suprasolidus	3.9	38.5	3.27486	0	0.858683	2.79626	0.384134	4.03907		3.5944	34.7244	1.58752	0	0.416256	2.52203	0.354034	3.29232		4.2056	42.2756	4.96219	0	1.30111	3.07048	0.414235	4.78582				4.03907	0.746748
Suprasolidus	3.7	35.9	2.30624	0	0.604706	2.60742	0.364435	3.57656		3.40602	32.2945	0.702273	0	0.184139	2.34555	0.33548	2.86517		3.99398	39.5055	3.9102	0	1.02527	2.86929	0.393391	4.28795				3.57656	0.711391
Suprasolidus	3.6	35.8	2.67524	0	0.701459	2.60015	0.354586	3.6562		3.30961	32.2011	1.06873	0	0.280226	2.33877	0.325984	2.94498		3.89039	39.3989	4.28174	0	1.12269	2.86154	0.383188	4.36742				3.6562	0.71122
Suprasolidus	4	42.1	4.15123	0	1.08847	3.05772	0.393984	4.54018		3.68511	38.1001	2.36109	0	0.619088	2.76721	0.362968	3.74927		4.31489	46.0999	5.94137	0	1.55785	3.34823	0.425	5.33109				4.54018	0.79091
Suprasolidus	3.5	41.1	3.78223	0	0.991718	2.98509	0.344736	4.32155		3.20422	37.1612	2.02507	0	0.530982	2.69901	0.315602	3.5456		3.79578	45.0388	5.53939	0	1.45245	3.27117	0.37387	5.0975				4.32155	0.775949
Suprasolidus	3.4	31.2	3.04423	0	0.798212	2.26606	0.334886	3.39915		3.12422	27.919	1.55631	0	0.408072	2.02775	0.307724	2.74355		3.67578	34.481	4.53216	0	1.18835	2.50436	0.362049	4.05476				3.39915	0.655605
Suprasolidus	3.5	32	2.12174	0	0.55633	2.32416	0.344736	3.22523		3.21967	28.6622	0.626906	0	0.164377	2.08174	0.317125	2.56324		3.78033	35.3378	3.61657	0	0.948282	2.56658	0.372347	3.88721				3.22523	0.661987
Suprasolidus	3.8	25.6	2.67524	0	0.701459	1.85933	0.374285	2.93507		3.51797	22.7344	1.34969	0	0.353895	1.6512	0.346506	2.3516		4.08203	28.4656	4.00078	0	1.04902	2.06746	0.402064	3.51854				2.93507	0.58347
Suprasolidus	3.3	32.5	2.76749	0	0.725647	2.36048	0.325037	3.41116		3.02603	29.127	1.24955	0	0.327637	2.1155	0.298051	2.74118		3.57397	35.873	4.28542	0	1.12366	2.60545	0.352022	4.08113				3.41116	0.669975
Suprasolidus	2.9	35.5	2.76749	0	0.725647	2.57837	0.285638	3.58965		2.63604	31.9213	1.17186	0	0.307266	2.31844	0.259639	2.88535		3.16396	39.0787	4.36311	0	1.14403	2.83829	0.311637	4.29395				3.58965	0.704304
Suprasolidus	2	32.7	2.35236	0	0.6168	2.375	0.196992	3.18879		1.77603	29.3131	0.844204	0	0.221354	2.12901	0.174931	2.5253		2.22397	36.0869	3.86052	0	1.01225	2.62099	0.219053	3.85229				3.18879	0.663496
Suprasolidus	2.9	30.9	2.30624	0	0.604706	2.24427	0.285638	3.13461		2.64434	27.6405	0.842979	0	0.221033	2.00753	0.260457	2.48902		3.15566	34.1595	3.7695	0	0.988379	2.481	0.31082	3.7802				3.13461	0.645592
Suprasolidus	3.4	43.4	2.67524	0	0.701459	3.15214	0.334886	4.18849		3.10462	39.3224	0.880658	0	0.230912	2.85599	0.305792	3.39269		3.69538	47.4776	4.46981	0	1.17201	3.4483	0.36398	4.98428				4.18849	0.795796
Suprasolidus	2.9	34	2.39849	0	0.628894	2.46942	0.285638	3.38395		2.63888	30.523	0.848763	0	0.222549	2.21689	0.259919	2.69936		3.16112	37.477	3.94821	0	1.03524	2.72195	0.311358	4.06855				3.38395	0.684596
Suprasolidus	2.9	35.4	2.62911	0	0.689365	2.5711	0.285638	3.54611		2.63629	31.828	1.03836	0	0.272263	2.31167	0.259664	2.84359		3.16371	38.972	4.21986	0	1.10647	2.83054	0.311612	4.24862				3.54611	0.702511
Suprasolidus	2.8	39.7	3.78223	0	0.991718	2.88341	0.275789	4.15092		2.53187	35.8483	2.06337	0	0.541026	2.60366	0.249379	3.39406		3.06813	43.5517	5.50109	0	1.44241	3.16316	0.302199	4.90777				4.15092	0.756854
Suprasolidus	3.1	37.6	2.16786	0	0.568424	2.73089	0.305338	3.60465		2.82529	33.8826	0.525673	0	0.137834	2.46089	0.27828	2.87701		3.37471	41.3174	3.81005	0	0.999014	3.00088	0.332396	4.33229				3.60465	0.727643
Suprasolidus	3	39	2.76749	0	0.725647	2.83257	0.295488	3.85371		2.72626	35.1926	1.08118	0	0.28349	2.55604	0.268526	3.10805		3.27374	42.8074	4.45379	0	1.1678	3.1091	0.32245	4.59936				3.85371	0.745654
Suprasolidus	2.8	28.6	2.44461	0	0.640988	2.07722	0.275789	2.994		2.55221	25.508	1.04452	0	0.273878	1.85265	0.251382	2.37791		3.04779	31.692	3.8447	0	1.0081	2.30179	0.300195	3.61008				2.994	0.616086
Suprasolidus	3.2	35.3	3.32098	0	0.870777	2.56384	0.315187	3.7498		2.92483	31.7347	1.71945	0	0.450848	2.30489	0.288084	3.04382		3.47517	38.8653	4.92252	0	1.29071	2.82279	0.34229	4.45579				3.7498	0.705983
Suprasolidus	3.8	28.2	2.49074	0	0.653083	2.04817	0.374285	3.07553		3.51418	25.1376	1.09384	0	0.28681	1.82575	0.346133	2.45869		4.08582	31.2624	3.88763	0	1.01936	2.27059	0.402437	3.69238				3.07553	0.616844
Suprasolidus	3.9	30.9	2.67524	0	0.701459	2.24427	0.384134	3.32986		3.60631	27.6404	1.19855	0	0.314266	2.00752	0.355207	2.677		4.19369	34.1596	4.15192	0	1.08865	2.48101	0.413062	3.98272				3.32986	0.652864
Suprasolidus	4.3	33.2	2.95198	0	0.774024	2.41132	0.423533	3.60887		3.98853	29.7781	1.40504	0	0.368407	2.16279	0.392854	2.92405		4.61147	36.6219	4.49893	0	1.17964	2.65985	0.454212	4.2937				3.60887	0.684826
Suprasolidus	3.3	37.4	3.22873	0	0.846589	2.71636	0.325037	3.88799		3.01769	33.6956	1.57379	0	0.412656	2.44731	0.29723	3.15719		3.58231	41.1044	4.88367	0	1.28052	2.98542	0.352843	4.61878				3.88799	0.730793
Suprasolidus	3	31.3	3.22873	0	0.846589	2.27332	0.295488	3.4154		2.73925	28.0118	1.73747	0	0.455574	2.0345	0.269805	2.75988		3.26075	34.5882	4.71999	0	1.2376	2.51214	0.321171	4.07091				3.4154	0.655516
Suprasolidus	3.5	32.4	2.99811	0	0.786118	2.35321	0.344736	3.48407		3.21856	29.034	1.47752	0	0.387413	2.10874	0.317015	2.81317		3.78144	35.766	4.5187	0	1.18482	2.59768	0.372457	4.15496				3.48407	0.670897
Suprasolidus	3.4	26.8	2.07561	0	0.544235	1.94648	0.334886	2.82561		3.13181	23.8428	0.729575	0	0.191298	1.7317	0.308471	2.23147		3.66819	29.7572	3.42165	0	0.897173	2.16126	0.361302	3.41974				2.82561	0.594134
Suprasolidus	4.1	34.1	3.32098	0	0.870777	2.47668	0.403834	3.75129		3.79402	30.6161	1.74506	0	0.457564	2.22365	0.373695	3.05491		4.40598	37.5839	4.8969	0	1.28399	2.72972	0.433972	4.44768				3.75129	0.696388
Suprasolidus	4.2	31.6	2.26011	0	0.592612	2.29511	0.413683	3.3014		3.8947	28.2905	0.769015	0	0.201639	2.05474	0.383613	2.63999		4.5053	34.9095	3.75121	0	0.983585	2.53548	0.443754	3.96282				3.3014	0.661414
Suprasolidus	3.2	26	2.21399	0	0.580518	1.88838	0.315187	2.78409		2.94085	23.1038	0.890302	0	0.233441	1.67803	0.289662	2.20113		3.45915	28.8962	3.53768	0	0.927595	2.09873	0.340712	3.36704				2.78409	0.582955
Suprasolidus	4	26.7	2.26011	0	0.592612	1.93922	0.393984	2.92582		3.7091	23.7503	0.908909	0	0.23832	1.72499	0.365332	2.32864		4.2909	29.6497	3.61132	0	0.946904	2.15345	0.422636	3.52299				2.92582	0.597178
Suprasolidus	3.6	23.3	2.72136	0	0.713553	1.69228	0.354586	2.76042		3.32902	20.6141	1.46399	0	0.383865	1.4972	0.327895	2.20897		3.87098	25.9859	3.97873	0	1.04324	1.88735	0.381276	3.31187				2.76042	0.551453
Suprasolidus	3.8	24	2.44461	0	0.640988	1.74312	0.374285	2.75839		3.52043	21.2589	1.17047	0	0.306901	1.54403	0.346749	2.19768		4.07957	26.7411	3.71876	0	0.975076	1.94221	0.401821	3.3191				2.75839	0.560711
Suprasolidus	3.6	27	2.30624	0	0.604706	1.96101	0.354586	2.9203		3.32366	24.0276	0.948665	0	0.248744	1.74513	0.327367	2.32124		3.87634	29.9724	3.66381	0	0.960668	2.17689	0.381804	3.51936				2.9203	0.599063
Suprasolidus	5	36.6	3.09036	0	0.810306	2.65826	0.49248	3.96104		4.66044	32.9479	1.44713	0	0.379445	2.39301	0.459035	3.23149		5.33956	40.2521	4.73359	0	1.24117	2.92351	0.525925	4.6906				3.96104	0.729556
Suprasolidus	4.6	27.3	2.90586	0	0.76193	1.9828	0.453082	3.19781		4.2865	24.3049	1.52066	0	0.398723	1.76527	0.422203	2.58619		4.9135	30.2951	4.29106	0	1.12514	2.20033	0.48396	3.80943				3.19781	0.611618
Suprasolidus	5.8	38.6	3.64386	0	0.955436	2.80352	0.571277	4.33023		5.43364	34.8179	1.93602	0	0.507634	2.52882	0.535192	3.57165		6.16636	42.3821	5.35169	0	1.40324	3.07821	0.607362	5.08881				4.33023	0.758582
Suprasolidus	4.1	29.5	1.79887	0	0.471671	2.14259	0.403834	3.01809		3.8016	26.3418	0.374755	0	0.0982624	1.9132	0.374442	2.38591		4.3984	32.6582	3.22298	0	0.845079	2.37197	0.433225	3.65027				3.01809	0.632181
Suprasolidus	4.2	28.4	2.07561	0	0.544235	2.06269	0.413683	3.02061		3.89945	25.3228	0.677307	0	0.177593	1.83919	0.384081	2.40087		4.50055	31.4772	3.47392	0	0.910878	2.28619	0.443286	3.64036				3.02061	0.619744
Suprasolidus	4.5	29.2	2.26011	0	0.592612	2.1208	0.443232	3.15664		4.18764	26.0637	0.83364	0	0.218584	1.89301	0.412466	2.52406		4.81236	32.3363	3.68659	0	0.96664	2.34858	0.473998	3.78922				3.15664	0.632583
Suprasolidus	4.9	33.8	2.62911	0	0.689365	2.45489	0.48263	3.62689		4.56768	30.3367	1.06737	0	0.279868	2.20335	0.449898	2.93312		5.23232	37.2633	4.19086	0	1.09886	2.70644	0.515363	4.32066				3.62689	0.693772
Suprasolidus	4.3	29.1	2.81361	0	0.737741	2.11353	0.423533	3.27481		3.99452	25.971	1.38161	0	0.362265	1.88628	0.393444	2.64199		4.60548	32.229	4.24561	0	1.11322	2.34079	0.453622	3.90763				3.27481	0.632822
Suprasolidus	4.6	33.9	2.30624	0	0.604706	2.46216	0.453082	3.51994		4.27759	30.4298	0.749128	0	0.196425	2.21012	0.421325	2.82787		4.92241	37.3702	3.86335	0	1.01299	2.7142	0.484838	4.21202				3.51994	0.692078
Suprasolidus	4.2	31.4	3.13648	0	0.8224	2.28058	0.413683	3.51667		3.89457	28.1047	1.63572	0	0.428894	2.04124	0.3836	2.85373		4.50543	34.6953	4.63724	0	1.21591	2.51992	0.443767	4.1796				3.51667	0.662931
Suprasolidus	4.7	5.2	2.85974	0	0.749836	0.377676	0.462931	1.59044		4.40689	4.11226	2.11766	0	0.555261	0.298673	0.434061	1.28799		4.99311	6.28774	3.60181	0	0.94441	0.456679	0.491802	1.89289				1.59044	0.302448
Suprasolidus	3.6	24.9	2.07561	0	0.544235	1.80849	0.354586	2.70731		3.32699	22.0886	0.783656	0	0.205478	1.60429	0.327695	2.13747		3.87301	27.7114	3.36757	0	0.882993	2.01268	0.381476	3.27715				2.70731	0.56984
Suprasolidus	4.2	33.4	3.36711	0	0.882871	2.42584	0.413683	3.7224		3.89152	29.9643	1.80828	0	0.47414	2.1763	0.3833	3.03374		4.50848	36.8357	4.92593	0	1.2916	2.67538	0.444067	4.41105				3.7224	0.688652
Suprasolidus	4.7	45.5	4.05898	0	1.06428	3.30467	0.462931	4.83188		4.35727	41.3002	2.18758	0	0.573593	2.99963	0.429174	4.0024		5.04273	49.6998	5.93038	0	1.55497	3.6097	0.496688	5.66136				4.83188	0.829479
Suprasolidus	3.2	27.7	2.62911	0	0.689365	2.01185	0.315187	3.0164		2.93784	24.675	1.24848	0	0.327358	1.79214	0.289366	2.40887		3.46216	30.725	4.00974	0	1.05137	2.23156	0.341009	3.62394				3.0164	0.607535
Suprasolidus	1.6	24.3	1.66049	0	0.435388	1.76491	0.157594	2.35789		1.41001	21.5355	0.409048	0	0.107254	1.56413	0.13888	1.81026		1.78999	27.0645	2.91194	0	0.763523	1.96569	0.176307	2.90552				2.35789	0.54763
Suprasolidus	4	36.4	2.58299	0	0.677271	2.64373	0.393984	3.71499		3.69442	32.7612	0.959672	0	0.25163	2.37945	0.363886	2.99496		4.30558	40.0388	4.2063	0	1.10291	2.90802	0.424082	4.43501				3.71499	0.720023
Suprasolidus	3.1	39.6	2.85974	0	0.749836	2.87615	0.305338	3.93132		2.82153	35.7546	1.15639	0	0.303211	2.59685	0.277909	3.17797		3.37847	43.4454	4.56308	0	1.19646	3.15544	0.332766	4.68467				3.93132	0.753346
Suprasolidus	5.4	37.2	2.16786	0	0.568424	2.70184	0.531878	3.80214		5.0477	33.5085	0.521048	0	0.136621	2.43372	0.497178	3.06752		5.7523	40.8915	3.81468	0	1.00023	2.96995	0.566579	4.53675				3.80214	0.734614
Suprasolidus	4.6	28.6	1.79887	0	0.471671	2.07722	0.453082	3.00197		4.28525	25.5079	0.396487	0	0.103961	1.85264	0.42208	2.37868		4.91475	31.6921	3.20124	0	0.839381	2.30179	0.484083	3.62526				3.00197	0.623288
Suprasolidus	3.4	26	2.49074	0	0.653083	1.88838	0.334886	2.87635		3.13283	23.1037	1.16029	0	0.304233	1.67802	0.308571	2.29083		3.66717	28.8963	3.82119	0	1.00193	2.09874	0.361202	3.46187				2.87635	0.585521
Suprasolidus	3.8	26.7	2.16786	0	0.568424	1.93922	0.374285	2.88193		3.51661	23.7504	0.819927	0	0.214989	1.72499	0.346372	2.28635		4.08339	29.6496	3.5158	0	0.921859	2.15345	0.402198	3.47751				2.88193	0.595581
Suprasolidus	4.6	25.2	2.62911	0	0.689365	1.83028	0.453082	2.97272		4.28946	22.3652	1.30957	0	0.343374	1.62439	0.422495	2.39026		4.91054	28.0348	3.94866	0	1.03536	2.03617	0.483669	3.55519				2.97272	0.582467
Suprasolidus	6.1	37.2	3.68998	0	0.96753	2.70184	0.600826	4.27019		5.72711	33.5084	2.01458	0	0.528233	2.43372	0.564097	3.52605		6.47289	40.8916	5.36538	0	1.40683	2.96995	0.637554	5.01433				4.27019	0.744143
Suprasolidus	4.2	27.85	2.85974	0	0.749836	2.02275	0.413683	3.18626		3.89985	24.8137	1.4629	0	0.383579	1.80222	0.38412	2.56992		4.50015	30.8863	4.25657	0	1.11609	2.24327	0.443247	3.80261				3.18626	0.616348
Suprasolidus	4	26.6	2.81361	0	0.737741	1.93196	0.393984	3.06368		3.70896	23.6579	1.4549	0	0.381481	1.71827	0.365318	2.46507		4.29104	29.5421	4.17232	0	1.094	2.14564	0.42265	3.66229				3.06368	0.598611
Suprasolidus	4.2	32.5	2.67524	0	0.701459	2.36048	0.413683	3.47562		3.89318	29.127	1.15259	0	0.302214	2.11549	0.383462	2.80117		4.50682	35.873	4.19788	0	1.1007	2.60546	0.443904	4.15007				3.47562	0.674449
Suprasolidus	4.4	34	2.53686	0	0.665177	2.46942	0.433382	3.56798		4.08411	30.523	0.97475	0	0.255584	2.21688	0.402269	2.87473		4.71589	37.477	4.09897	0	1.07477	2.72196	0.464496	4.26122				3.56798	0.693245
Suprasolidus	3.4	35	1.98336	0	0.520047	2.54205	0.334886	3.39698		3.11861	31.4549	0.410131	0	0.107538	2.28457	0.307171	2.69928		3.68139	38.5451	3.5566	0	0.932556	2.79953	0.362602	4.09469				3.39698	0.697702
Suprasolidus	3.8	29.9	2.16786	0	0.568424	2.17164	0.374285	3.11435		3.51177	26.7126	0.728534	0	0.191025	1.94014	0.345895	2.47706		4.08823	33.0874	3.60719	0	0.945823	2.40314	0.402674	3.75163				3.11435	0.637287
Suprasolidus	3.1	27.7	2.39849	0	0.628894	2.01185	0.305338	2.94608		2.8419	24.675	1.02285	0	0.268195	1.79215	0.279916	2.34026		3.3581	30.725	3.77413	0	0.989593	2.23156	0.330759	3.55191				2.94608	0.605826
Suprasolidus	4.8	25.3	2.35236	0	0.6168	1.83754	0.472781	2.92712		4.48258	22.4575	1.03358	0	0.27101	1.63109	0.441516	2.34361		5.11742	28.1425	3.67114	0	0.96259	2.04399	0.504046	3.51063				2.92712	0.583506
Suprasolidus	3.6	30.5	2.72136	0	0.713553	2.21522	0.354586	3.28335		3.31799	27.2692	1.25712	0	0.329623	1.98056	0.326808	2.63699		3.88201	33.7308	4.1856	0	1.09748	2.44987	0.382363	3.92972				3.28335	0.646362
Suprasolidus	2.7	25.1	2.35236	0	0.6168	1.82301	0.265939	2.70575		2.46241	22.2731	1.05633	0	0.276973	1.6177	0.242538	2.13721		2.93759	27.9269	3.6484	0	0.956627	2.02833	0.289341	3.2743				2.70575	0.568544
Suprasolidus	3.8	35	2.21399	0	0.580518	2.54205	0.374285	3.49685		3.50387	31.4549	0.634523	0	0.166375	2.28457	0.345117	2.79606		4.09613	38.5451	3.79345	0	0.994661	2.79953	0.403452	4.19764				3.49685	0.70079
Suprasolidus	5.4	28.7	2.72136	0	0.713553	2.08448	0.531878	3.32991		5.05853	25.6004	1.29398	0	0.339287	1.85936	0.498245	2.69689		5.74147	31.7996	4.14874	0	1.08782	2.3096	0.565511	3.96293				3.32991	0.63302
Suprasolidus	3.5	33.4	2.62911	0	0.689365	2.42584	0.344736	3.45994		3.21715	29.9643	1.08778	0	0.28522	2.17631	0.316876	2.77841		3.78285	36.8357	4.17045	0	1.09351	2.67537	0.372596	4.14148				3.45994	0.681537
Suprasolidus	3.5	28.4	2.16786	0	0.568424	2.06269	0.344736	2.97585		3.22538	25.3228	0.773296	0	0.202762	1.8392	0.317687	2.35964		3.77462	31.4772	3.56243	0	0.934086	2.28619	0.371785	3.59206				2.97585	0.616208
Suprasolidus	3.1	29.8	2.58299	0	0.677271	2.16437	0.305338	3.14698		2.83828	26.6199	1.14433	0	0.300048	1.93341	0.279559	2.51301		3.36172	32.9801	4.02164	0	1.05449	2.39534	0.331116	3.78095				3.14698	0.633969
Suprasolidus	3.1	34.4	2.26011	0	0.592612	2.49847	0.305338	3.39642		2.83068	30.8957	0.700573	0	0.183693	2.24395	0.27881	2.70646		3.36932	37.9043	3.81965	0	1.00153	2.75299	0.331865	4.08639				3.39642	0.689964
Suprasolidus	2.9	33.4	2.16786	0	0.568424	2.42584	0.285638	3.2799		2.64006	29.9644	0.638066	0	0.167304	2.17631	0.260035	2.60365		3.15994	36.8356	3.69766	0	0.969544	2.67537	0.311241	3.95616				3.2799	0.676251
Suprasolidus	2.8	30	2.12174	0	0.55633	2.1789	0.275789	3.01102		2.54995	26.8054	0.687553	0	0.18028	1.94688	0.25116	2.37832		3.05005	33.1946	3.55593	0	0.93238	2.41092	0.300418	3.64372				3.01102	0.6327
Suprasolidus	2.5	8	0.922495	0	0.241882	0.58104	0.24624	1.06916		2.29825	6.64432	0.194291	0	0.0509439	0.482577	0.226368	0.759889		2.70175	9.35568	1.6507	0	0.432821	0.679503	0.266112	1.37844				1.06916	0.309273
Suprasolidus	2.6	32.4	2.12174	0	0.55633	2.35321	0.25609	3.16563		2.35346	29.0341	0.621959	0	0.16308	2.10875	0.231806	2.50363		2.84654	35.7659	3.62152	0	0.949579	2.59768	0.280373	3.82763				3.16563	0.661997
Suprasolidus	2.8	29.5	2.39849	0	0.628894	2.14259	0.275789	3.04727		2.55066	26.3418	0.973648	0	0.255295	1.91321	0.25123	2.41973		3.04934	32.6582	3.82333	0	1.00249	2.37196	0.300348	3.6748				3.04727	0.627535
Suprasolidus	2.9	33.4	2.85974	0	0.749836	2.42584	0.285638	3.46132		2.63966	29.9644	1.3185	0	0.345718	2.17631	0.259996	2.78203		3.16034	36.8356	4.40097	0	1.15395	2.67537	0.311281	4.14061				3.46132	0.679291
Suprasolidus	2.8	36.5	2.16786	0	0.568424	2.65099	0.275789	3.49521		2.53839	32.8547	0.556063	0	0.145802	2.38624	0.250022	2.78206		3.06161	40.1453	3.77967	0	0.991045	2.91575	0.301556	4.20835				3.49521	0.713147
Suprasolidus	3.4	41	2.07561	0	0.544235	2.97783	0.334886	3.85695		3.10879	37.0674	0.34737	0	0.0910821	2.6922	0.306203	3.08949		3.69121	44.9326	3.80386	0	0.997389	3.26346	0.36357	4.62442				3.85695	0.767463
Suprasolidus	2.7	36.5	1.66049	0	0.435388	2.65099	0.265939	3.35232		2.44246	32.8547	0.0568113	0	0.0148962	2.38624	0.240573	2.64171		2.95754	40.1453	3.26417	0	0.855881	2.91575	0.291305	4.06294				3.35232	0.710614
Suprasolidus	2.7	32.1	1.84499	0	0.483765	2.33142	0.265939	3.08113		2.45029	28.7552	0.35729	0	0.0936831	2.08849	0.241344	2.42352		2.94971	35.4448	3.33269	0	0.873847	2.57435	0.290535	3.73874				3.08113	0.657609
Suprasolidus	2.8	32.6	2.39849	0	0.628894	2.36774	0.275789	3.27242		2.54518	29.2201	0.887386	0	0.232677	2.12225	0.25069	2.60562		3.05482	35.9799	3.90959	0	1.02511	2.61322	0.300888	3.93922				3.27242	0.666801
Suprasolidus	3.1	33.9	2.62911	0	0.689365	2.46216	0.305338	3.45686		2.83132	30.4299	1.077	0	0.282395	2.21012	0.278874	2.77139		3.36868	37.3701	4.18122	0	1.09634	2.71419	0.331802	4.14233				3.45686	0.685468
Suprasolidus	3.2	38.6	2.90586	0	0.76193	2.80352	0.315187	3.88063		2.91953	34.8181	1.22627	0	0.321532	2.52884	0.287562	3.13793		3.48047	42.3819	4.58545	0	1.20233	3.0782	0.342813	4.62334				3.88063	0.742705
Suprasolidus	3.1	32.2	2.44461	0	0.640988	2.33869	0.305338	3.28501		2.83431	28.8481	0.941705	0	0.246919	2.09524	0.279168	2.62133		3.36569	35.5519	3.94752	0	1.03506	2.58213	0.331507	3.9487				3.28501	0.663686
Suprasolidus	3.6	36.3	2.49074	0	0.653083	2.63647	0.354586	3.64414		3.30891	32.6679	0.874102	0	0.229194	2.37267	0.325915	2.92778		3.89109	39.9321	4.10737	0	1.07697	2.90027	0.383257	4.3605				3.64414	0.716361
Suprasolidus	3.3	34.9	2.30624	0	0.604706	2.53479	0.325037	3.46453		3.02231	31.3617	0.731317	0	0.191755	2.2778	0.297686	2.76724		3.57769	38.4383	3.88116	0	1.01766	2.79177	0.352388	4.16182				3.46453	0.69729
Suprasolidus	3.3	37.1	2.67524	0	0.701459	2.69457	0.325037	3.72107		3.01847	33.4152	1.0369	0	0.27188	2.42694	0.297307	2.99613		3.58153	40.7848	4.31357	0	1.13104	2.9622	0.352766	4.44601				3.72107	0.724937
Suprasolidus	3.2	32.8	2.49074	0	0.653083	2.38226	0.315187	3.35053		2.92946	29.4061	0.969991	0	0.254336	2.13576	0.28854	2.67864		3.47054	36.1939	4.01148	0	1.05183	2.62877	0.341834	4.02243				3.35053	0.671896
Suprasolidus	2.7	37.2	2.90586	0	0.76193	2.70184	0.265939	3.7297		2.44047	33.5087	1.26496	0	0.331678	2.43373	0.240377	3.00579		2.95953	40.8913	4.54676	0	1.19218	2.96994	0.291502	4.45362				3.7297	0.723917
Suprasolidus	3.4	35.4	2.95198	0	0.774024	2.5711	0.334886	3.68001		3.11744	31.8279	1.35276	0	0.354699	2.31166	0.307055	2.97342		3.68256	38.9721	4.55121	0	1.19335	2.83054	0.362718	4.38661				3.68001	0.706595
Suprasolidus	2.9	28	2.39849	0	0.628894	2.03364	0.285638	2.94817		2.64931	24.9526	1.01569	0	0.266318	1.81231	0.260946	2.33957		3.15069	31.0474	3.78129	0	0.99147	2.25497	0.310331	3.55677				2.94817	0.608601
Suprasolidus	2.9	40.2	2.39849	0	0.628894	2.91973	0.285638	3.83426		2.62807	36.317	0.68834	0	0.180486	2.6377	0.258854	3.07704		3.17193	44.083	4.10864	0	1.0773	3.20175	0.312423	4.59148				3.83426	0.757216
Suprasolidus	3.5	36	2.81361	0	0.737741	2.61468	0.344736	3.69716		3.21287	32.3878	1.2003	0	0.314725	2.35233	0.316454	2.98351		3.78713	39.6122	4.42692	0	1.16076	2.87703	0.373018	4.41081				3.69716	0.713652
Suprasolidus	2.8	34.9	2.39849	0	0.628894	2.53479	0.275789	3.43947		2.5411	31.3617	0.825314	0	0.216401	2.2778	0.250288	2.74449		3.0589	38.4383	3.97166	0	1.04139	2.79177	0.30129	4.13445				3.43947	0.694979
Suprasolidus	3.2	35	2.53686	0	0.665177	2.54205	0.315187	3.52241		2.92575	31.4549	0.956264	0	0.250737	2.28457	0.288175	2.82348		3.47425	38.5451	4.11746	0	1.07962	2.79953	0.3422	4.22134				3.52241	0.698931
Suprasolidus	3	40.8	2.81361	0	0.737741	2.9633	0.295488	3.99653		2.72316	36.8797	1.0819	0	0.283679	2.67857	0.268221	3.23047		3.27684	44.7203	4.54532	0	1.1918	3.24803	0.322755	4.76259				3.99653	0.766061
Suprasolidus	3.2	32.3	2.35236	0	0.6168	2.34595	0.315187	3.27794		2.93038	28.9411	0.847572	0	0.222237	2.10199	0.28863	2.61286		3.46962	35.6589	3.85715	0	1.01136	2.58991	0.341744	3.94301				3.27794	0.665078
Suprasolidus	2.8	37.7	2.72136	0	0.713553	2.73815	0.275789	3.72749		2.53595	33.9761	1.06996	0	0.280548	2.46768	0.249781	2.99801		3.06405	41.4239	4.37276	0	1.14656	3.00862	0.301797	4.45697				3.72749	0.729481
Suprasolidus	3.4	34.6	2.49074	0	0.653083	2.513	0.334886	3.50097		3.11899	31.082	0.920195	0	0.241279	2.25749	0.307208	2.80598		3.68101	38.118	4.06128	0	1.06489	2.76851	0.362565	4.19596				3.50097	0.694991
Suprasolidus	3.3	40.8	1.52212	0	0.399106	2.9633	0.325037	3.68745		3.013	36.8797	-0.193036	0	-0.0506149	2.67858	0.296769	2.92473		3.587	44.7203	3.23727	0	0.848827	3.24803	0.353305	4.45016				3.68745	0.762718
Suprasolidus	3.5	32.4	3.04423	0	0.798212	2.35321	0.344736	3.49616		3.21854	29.034	1.52284	0	0.399295	2.10874	0.317013	2.82505		3.78146	35.766	4.56563	0	1.19713	2.59768	0.372459	4.16727				3.49616	0.671112
Suprasolidus	3.4	38.9	2.85974	0	0.749836	2.82531	0.334886	3.91003		3.11178	35.0989	1.17208	0	0.307325	2.54923	0.306498	3.16306		3.68822	42.7011	4.54739	0	1.19235	3.10138	0.363275	4.657				3.91003	0.746973
Suprasolidus	3.1	38.7	2.72136	0	0.713553	2.81078	0.305338	3.82967		2.82312	34.9117	1.04272	0	0.273407	2.53564	0.278066	3.08711		3.37688	42.4883	4.4	0	1.1537	3.08593	0.332609	4.57224				3.82967	0.742564
Suprasolidus	3.2	34.5	2.49074	0	0.653083	2.50574	0.315187	3.474		2.92661	30.9889	0.924179	0	0.242324	2.25072	0.28826	2.7813		3.47339	38.0111	4.0573	0	1.06384	2.76075	0.342115	4.16671				3.474	0.6927
Suprasolidus	3.1	32	2.58299	0	0.677271	2.32416	0.305338	3.30677		2.83457	28.6622	1.08323	0	0.284027	2.08174	0.279194	2.64496		3.36543	35.3378	4.08275	0	1.07051	2.56658	0.331482	3.96858				3.30677	0.661811
Suprasolidus	2.8	31.3	1.79887	0	0.471671	2.27332	0.275789	3.02078		2.54785	28.0119	0.333491	0	0.0874428	2.03451	0.250953	2.3729		3.05215	34.5881	3.26424	0	0.855899	2.51213	0.300625	3.66866				3.02078	0.647877
Suprasolidus	3.5	38.7	2.12174	0	0.55633	2.81078	0.344736	3.71185		3.20888	34.9117	0.44963	0	0.117895	2.53564	0.316062	2.96959		3.79112	42.4883	3.79385	0	0.994764	3.08593	0.37341	4.4541				3.71185	0.742254
Suprasolidus	3	37.5	1.98336	0	0.520047	2.72363	0.295488	3.53916		2.72927	33.7891	0.347098	0	0.0910107	2.4541	0.268822	2.81394		3.27073	41.2109	3.61963	0	0.949084	2.99315	0.322154	4.26438				3.53916	0.725224
Suprasolidus	3.4	37.6	2.44461	0	0.640988	2.73089	0.334886	3.70676		3.11411	33.8826	0.796366	0	0.208811	2.46089	0.306728	2.97643		3.68589	41.3174	4.09286	0	1.07317	3.00089	0.363045	4.4371				3.70676	0.730334
Suprasolidus	3.5	33.7	2.76749	0	0.725647	2.44763	0.344736	3.51801		3.21659	30.2436	1.21577	0	0.318781	2.19659	0.316822	2.8322		3.78341	37.1564	4.3192	0	1.13251	2.69867	0.37265	4.20383				3.51801	0.685818
Suprasolidus	3.4	40.1	2.85974	0	0.749836	2.91246	0.334886	3.99718		3.10983	36.2232	1.14218	0	0.299484	2.63089	0.306306	3.23668		3.69017	43.9768	4.57729	0	1.20019	3.19404	0.363466	4.75769				3.99718	0.760505
Suprasolidus	3.4	35.7	2.85974	0	0.749836	2.59289	0.334886	3.67761		3.117	32.1078	1.25416	0	0.328847	2.33199	0.307012	2.96785		3.683	39.2922	4.46531	0	1.17082	2.85379	0.362761	4.38737				3.67761	0.709762
Suprasolidus	2.6	31	3.13648	0	0.8224	2.25153	0.25609	3.33002		2.3554	27.7333	1.65782	0	0.434688	2.01427	0.231997	2.68096		2.8446	34.2667	4.61515	0	1.21011	2.48879	0.280182	3.97908				3.33002	0.649065
Suprasolidus	3.3	37	2.07561	0	0.544235	2.68731	0.325037	3.55658		3.01896	33.3218	0.449054	0	0.117744	2.42016	0.297356	2.83526		3.58104	40.6782	3.70217	0	0.970727	2.95446	0.352718	4.27791				3.55658	0.721323
Suprasolidus	3.1	38	2.72136	0	0.713553	2.75994	0.305338	3.77883		2.82431	34.2566	1.06048	0	0.278063	2.48806	0.278183	3.04431		3.37569	41.7434	4.38224	0	1.14904	3.03182	0.332492	4.51336				3.77883	0.734525
Suprasolidus	2.9	36.6	2.58299	0	0.677271	2.65826	0.285638	3.62117		2.63422	32.9481	0.961542	0	0.252121	2.39302	0.25946	2.9046		3.16578	40.2519	4.20443	0	1.10242	2.9235	0.311816	4.33773				3.62117	0.716567
Suprasolidus	2.8	35.3	2.53686	0	0.665177	2.56384	0.275789	3.5048		2.54031	31.7347	0.950862	0	0.24932	2.30489	0.25021	2.80442		3.05969	38.8653	4.12286	0	1.08103	2.82279	0.301368	4.20519				3.5048	0.700381
Suprasolidus	2.8	36.3	2.72136	0	0.713553	2.63647	0.275789	3.62581		2.53843	32.6679	1.10614	0	0.290035	2.37267	0.250025	2.91273		3.06157	39.9321	4.33658	0	1.13707	2.90027	0.301553	4.33889				3.62581	0.713081
Suprasolidus	2.8	35.5	2.16786	0	0.568424	2.57837	0.275789	3.42258		2.54017	31.9213	0.582378	0	0.152702	2.31844	0.250196	2.72134		3.05983	39.0787	3.75335	0	0.984145	2.83829	0.301381	4.12381				3.42258	0.701235
Suprasolidus	2.7	36.3	2.62911	0	0.689365	2.63647	0.265939	3.59177		2.44225	32.6679	1.01597	0	0.266392	2.37267	0.240551	2.87961		2.95775	39.9321	4.24225	0	1.11234	2.90027	0.291327	4.30393				3.59177	0.712158
Suprasolidus	3	31.6	2.49074	0	0.653083	2.29511	0.295488	3.24368		2.73915	28.2905	1.00424	0	0.263316	2.05474	0.269795	2.58785		3.26085	34.9095	3.97724	0	1.04285	2.53547	0.321181	3.8995				3.24368	0.655826
Suprasolidus	3.1	39.8	2.02949	0	0.532141	2.89067	0.305338	3.72815		2.82164	35.942	0.333458	0	0.0874343	2.61047	0.27792	2.97582		3.37836	43.658	3.72552	0	0.976848	3.17088	0.332755	4.48048				3.72815	0.752329
Suprasolidus	2.9	34.7	1.84499	0	0.483765	2.52026	0.285638	3.28966		2.63798	31.1753	0.285133	0	0.0747633	2.26426	0.25983	2.59886		3.16202	38.2247	3.40485	0	0.892766	2.77626	0.311447	3.98047				3.28966	0.690809
Suprasolidus	3.4	45.7	2.90586	0	0.76193	3.31919	0.334886	4.41601		3.10085	41.4889	1.05465	0	0.276535	3.01334	0.305422	3.59529		3.69915	49.9111	4.75707	0	1.24732	3.62504	0.364351	5.23672				4.41601	0.820712
Suprasolidus	1.8	25.3	2.12174	0	0.55633	1.83754	0.177293	2.57116		1.59931	22.4577	0.830462	0	0.217751	1.6311	0.157525	2.00638		2.00069	28.1423	3.41302	0	0.894908	2.04397	0.19706	3.13594				2.57116	0.564781
Suprasolidus	3.5	34.4	2.30624	0	0.604706	2.49847	0.344736	3.44791		3.21571	30.8957	0.743317	0	0.194901	2.24395	0.316735	2.75559		3.78429	37.9043	3.86916	0	1.01451	2.75299	0.372737	4.14024				3.44791	0.692327
Suprasolidus	3.3	28.5	2.30624	0	0.604706	2.06996	0.325037	2.9997		3.03283	25.4154	0.907863	0	0.238046	1.84592	0.298722	2.38269		3.56717	31.5846	3.70461	0	0.971366	2.29399	0.351352	3.61671				2.9997	0.617009
Suprasolidus	3.6	32.5	2.49074	0	0.653083	2.36048	0.354586	3.36814		3.31495	29.127	0.975417	0	0.255759	2.1155	0.32651	2.69776		3.88505	35.873	4.00606	0	1.05041	2.60545	0.382662	4.03852				3.36814	0.67038
Suprasolidus	3.5	34.7	2.07561	0	0.544235	2.52026	0.344736	3.40923		3.21535	31.1753	0.508296	0	0.133277	2.26426	0.316699	2.71424		3.78465	38.2247	3.64293	0	0.955194	2.77626	0.372773	4.10423				3.40923	0.694997
Suprasolidus	3.3	33	2.02949	0	0.532141	2.39679	0.325037	3.25397		3.02561	29.5921	0.510116	0	0.133755	2.14928	0.29801	2.58104		3.57439	36.4079	3.54886	0	0.930528	2.6443	0.352063	3.92689				3.25397	0.672926
Suprasolidus	3.5	33.1	2.39849	0	0.628894	2.40405	0.344736	3.37768		3.21775	29.6851	0.869075	0	0.227875	2.15603	0.316936	2.70084		3.78225	36.5149	3.9279	0	1.02991	2.65207	0.372536	4.05452				3.37768	0.67684
Suprasolidus	2.9	49.9	4.56635	0	1.19732	3.62424	0.285638	5.10719		2.61075	45.4587	2.60116	0	0.682035	3.30167	0.257149	4.24085		3.18925	54.3413	6.53155	0	1.7126	3.94681	0.314128	5.97354				5.10719	0.866343
Suprasolidus	3.4	27	2.02949	0	0.532141	1.96101	0.334886	2.82804		3.13152	24.0277	0.678467	0	0.177897	1.74513	0.308442	2.23147		3.66848	29.9723	3.38051	0	0.886386	2.17689	0.361331	3.42461				2.82804	0.596569
Suprasolidus	3.2	30.6	1.66049	0	0.435388	2.22248	0.315187	2.97305		2.93361	27.3621	0.2142	0	0.0561643	1.98731	0.288949	2.33242		3.46639	33.8379	3.10678	0	0.814612	2.45765	0.341425	3.61369				2.97305	0.640634
Suprasolidus	3	29.9	2.58299	0	0.677271	2.17164	0.295488	3.1444		2.74201	26.7127	1.14222	0	0.299496	1.94014	0.270077	2.50971		3.25799	33.0873	4.02375	0	1.05505	2.40313	0.320899	3.77908				3.1444	0.634682
Suprasolidus	3.1	22.4	2.35236	0	0.6168	1.62691	0.305338	2.54905		2.85054	19.786	1.1336	0	0.297235	1.43705	0.280767	2.01506		3.34946	25.014	3.57113	0	0.936366	1.81677	0.329908	3.08304				2.54905	0.533994
Suprasolidus	3.3	24.4	2.35236	0	0.6168	1.77217	0.325037	2.71401		3.03935	21.6276	1.07232	0	0.281168	1.57081	0.299364	2.15134		3.56065	27.1724	3.6324	0	0.952432	1.97353	0.35071	3.27668				2.71401	0.562666
Suprasolidus	2.9	18.2	1.61437	0	0.423294	1.32187	0.285638	2.0308		2.66587	15.9316	0.541569	0	0.142002	1.15711	0.262577	1.56169		3.13413	20.4684	2.68716	0	0.704587	1.48662	0.3087	2.49991				2.0308	0.469107
Suprasolidus	4	29.7	2.26011	0	0.592612	2.15711	0.393984	3.14371		3.70468	26.5272	0.823339	0	0.215883	1.92667	0.364897	2.50745		4.29532	32.8728	3.69689	0	0.969341	2.38755	0.423071	3.77997				3.14371	0.636259
Suprasolidus	4.9	36.9	2.26011	0	0.592612	2.68005	0.48263	3.75529		4.56358	33.2282	0.622883	0	0.163323	2.41337	0.449494	3.02618		5.23642	40.5718	3.89734	0	1.0219	2.94673	0.515767	4.4844				3.75529	0.729107
Suprasolidus	4.7	38.2	2.02949	0	0.532141	2.77447	0.462931	3.76954		4.36833	34.4437	0.363697	0	0.095363	2.50165	0.430263	3.02727		5.03167	41.9563	3.69528	0	0.96892	3.04729	0.495599	4.51181				3.76954	0.742268
Suprasolidus	4.5	32.3	1.89112	0	0.495859	2.34595	0.443232	3.28504		4.18345	28.941	0.384602	0	0.100844	2.10199	0.412053	2.61488		4.81655	35.659	3.39763	0	0.890874	2.58991	0.474411	3.9552				3.28504	0.670156
Suprasolidus	4.2	38.6	1.93724	0	0.507953	2.80352	0.413683	3.72515		3.8845	34.818	0.265859	0	0.0697095	2.52883	0.382608	2.98115		4.5155	42.382	3.60862	0	0.946197	3.0782	0.444758	4.46916				3.72515	0.744002
Suprasolidus	3.9	36.4	2.49074	0	0.653083	2.64373	0.384134	3.68095		3.598	32.7612	0.869529	0	0.227995	2.37945	0.354388	2.96183		4.202	40.0388	4.11195	0	1.07817	2.90802	0.413881	4.40007				3.68095	0.719117
Suprasolidus	4	30.3	2.26011	0	0.592612	2.20069	0.393984	3.18728		3.70379	27.0836	0.806526	0	0.211475	1.96708	0.364809	2.54337		4.29621	33.5164	3.7137	0	0.973749	2.43429	0.423159	3.8312				3.18728	0.643919
Suprasolidus	4.6	37.8	2.16786	0	0.568424	2.74541	0.453082	3.76692		4.27211	34.0695	0.510889	0	0.133957	2.47447	0.420786	3.02921		4.92789	41.5305	3.82484	0	1.00289	3.01636	0.485377	4.50463				3.76692	0.737707
Suprasolidus	4.5	31.8	1.98336	0	0.520047	2.30963	0.443232	3.27291		4.18411	28.4763	0.489106	0	0.128246	2.06823	0.412118	2.6086		4.81589	35.1237	3.47762	0	0.911849	2.55104	0.474346	3.93723				3.27291	0.664316
Suprasolidus	5.4	33.5	2.12174	0	0.55633	2.4331	0.531878	3.52131		5.05259	30.0573	0.572743	0	0.150176	2.18306	0.49766	2.8309		5.74741	36.9427	3.67074	0	0.962484	2.68315	0.566097	4.21173				3.52131	0.690414
Suprasolidus	4.8	27.1	1.98336	0	0.520047	1.96827	0.472781	2.9611		4.48038	24.12	0.619218	0	0.162362	1.75184	0.4413	2.3555		5.11962	30.08	3.34751	0	0.877733	2.18471	0.504262	3.5667				2.9611	0.605603
Suprasolidus	4.2	28.8	1.75274	0	0.459577	2.09174	0.413683	2.965		3.89904	25.6932	0.348516	0	0.0913825	1.8661	0.38404	2.34152		4.50096	31.9068	3.15697	0	0.827771	2.31739	0.443326	3.58849				2.965	0.623485
Suprasolidus	3.4	29.1	1.79887	0	0.471671	2.11353	0.334886	2.92009		3.1283	25.9711	0.391373	0	0.10262	1.88628	0.308125	2.29703		3.6717	32.2289	3.20636	0	0.840722	2.34078	0.361648	3.54315				2.92009	0.623061
Suprasolidus	4.5	35.2	1.84499	0	0.483765	2.55658	0.443232	3.48357		4.17932	31.6414	0.261084	0	0.0684575	2.29811	0.411646	2.77822		4.82068	38.7586	3.4289	0	0.899072	2.81504	0.474818	4.18893				3.48357	0.705356
Suprasolidus	4.9	32.7	2.49074	0	0.653083	2.375	0.48263	3.51071		4.56925	29.3129	0.960806	0	0.251928	2.129	0.450053	2.83098		5.23075	36.0871	4.02067	0	1.05424	2.621	0.515208	4.19045				3.51071	0.679735
Suprasolidus	3.1	25.7	2.07561	0	0.544235	1.86659	0.305338	2.71616		2.8454	22.8268	0.764067	0	0.200342	1.65791	0.28026	2.13851		3.3546	28.5732	3.38716	0	0.888129	2.07527	0.330415	3.29382				2.71616	0.577651
Suprasolidus	3.8	32.3	2.58299	0	0.677271	2.34595	0.374285	3.3975		3.50786	28.941	1.07017	0	0.280603	2.10199	0.34551	2.7281		4.09214	35.659	4.09581	0	1.07394	2.58991	0.403059	4.06691				3.3975	0.669404
Suprasolidus	3.7	33.3	1.79887	0	0.471671	2.41858	0.364435	3.25468		3.41038	29.8713	0.272173	0	0.071365	2.16955	0.335909	2.57683		3.98962	36.7287	3.32556	0	0.871977	2.66761	0.392962	3.93254				3.25468	0.67786
Suprasolidus	1.9	32.3	1.93724	0	0.507953	2.34595	0.187142	3.04104		1.68098	28.9412	0.447433	0	0.117319	2.102	0.16557	2.38489		2.11902	35.6588	3.42705	0	0.898587	2.5899	0.208715	3.6972				3.04104	0.656158
Suprasolidus	1.4	27.8	1.42987	0	0.374918	2.01911	0.137894	2.53193		1.21048	24.7677	0.0794209	0	0.0208245	1.79888	0.119227	1.93893		1.58952	30.8323	2.78031	0	0.729011	2.23935	0.156562	3.12492				2.53193	0.592998
Suprasolidus	2.1	24.5	1.47599	0	0.387012	1.77944	0.206842	2.37329		1.88896	21.7199	0.218557	0	0.0573067	1.57752	0.186055	1.82088		2.31104	27.2801	2.73343	0	0.716717	1.98135	0.227628	2.9257				2.37329	0.552411
Suprasolidus	2.8	32.5	3.04423	0	0.798212	2.36048	0.275789	3.43448		2.54498	29.127	1.52482	0	0.399814	2.1155	0.25067	2.76598		3.05502	35.873	4.56365	0	1.19661	2.60545	0.300907	4.10297				3.43448	0.668495
Suprasolidus	4.7	37	2.76749	0	0.725647	2.68731	0.462931	3.87589		4.36968	33.3216	1.12116	0	0.293972	2.42015	0.430396	3.14452		5.03032	40.6784	4.41381	0	1.15732	2.95447	0.495466	4.60726				3.87589	0.731369
Suprasolidus	2.6	26.4	1.93724	0	0.507953	1.91743	0.25609	2.68147		2.36447	23.4733	0.611394	0	0.16031	1.70486	0.232891	2.09806		2.83553	29.3267	3.26309	0	0.855596	2.13	0.279288	3.26489				2.68147	0.58341
Suprasolidus	2.5	25.5	1.61437	0	0.423294	1.85207	0.24624	2.5216		2.2704	22.6423	0.321633	0	0.0843337	1.64451	0.223625	1.95247		2.7296	28.3577	2.9071	0	0.762255	2.05962	0.268855	3.09073				2.5216	0.569133
Suprasolidus	4.5	28.2	1.33762	0	0.35073	2.04817	0.443232	2.84213		4.1895	25.1376	-0.0449525	0	-0.0117867	1.82575	0.412649	2.22661		4.8105	31.2624	2.72019	0	0.713246	2.27058	0.473815	3.45765				2.84213	0.615518
Suprasolidus	4.1	29.2	2.53686	0	0.665177	2.1208	0.403834	3.18981		3.80166	26.0637	1.10855	0	0.290668	1.89301	0.374448	2.55812		4.39834	32.3363	3.96517	0	1.03969	2.34858	0.433219	3.82149				3.18981	0.631682
Suprasolidus	4.4	34.2	2.44461	0	0.640988	2.48395	0.433382	3.55832		4.08387	30.7093	0.87866	0	0.230389	2.23041	0.402245	2.86305		4.71613	37.6907	4.01056	0	1.05159	2.73748	0.46452	4.25359				3.55832	0.69527
Suprasolidus	3.5	29	2.30624	0	0.604706	2.10627	0.344736	3.05571		3.22435	25.8785	0.892156	0	0.233927	1.87955	0.317586	2.43107		3.77565	32.1215	3.72032	0	0.975485	2.33299	0.371886	3.68036				3.05571	0.624646
Suprasolidus	4.4	29.5	2.58299	0	0.677271	2.14259	0.433382	3.25324		4.09054	26.3417	1.14318	0	0.299747	1.9132	0.402902	2.61585		4.70946	32.6583	4.02279	0	1.05479	2.37197	0.463863	3.89063				3.25324	0.63739
Suprasolidus	3.5	32.2	2.99811	0	0.786118	2.33869	0.344736	3.46954		3.21888	28.8481	1.48296	0	0.388838	2.09524	0.317047	2.80112		3.78112	35.5519	4.51326	0	1.1834	2.58214	0.372425	4.13796				3.46954	0.668419
Suprasolidus	5.2	34.2	2.62911	0	0.689365	2.48395	0.512179	3.68549		4.8576	30.7092	1.05468	0	0.276542	2.23041	0.478454	2.98541		5.5424	37.6908	4.20354	0	1.10219	2.73748	0.545904	4.38557				3.68549	0.700085
Suprasolidus	4	19.5	1.56824	0	0.4112	1.41629	0.393984	2.22147		3.71951	17.1227	0.445657	0	0.116853	1.24362	0.366357	1.72683		4.28049	21.8773	2.69083	0	0.705547	1.58895	0.421611	2.71611				2.22147	0.49464
Suprasolidus	4.2	26.1	1.98336	0	0.520047	1.89564	0.413683	2.82937		3.90278	23.1961	0.653004	0	0.171221	1.68473	0.384409	2.24036		4.49722	29.0039	3.31373	0	0.868874	2.10656	0.442958	3.41839				2.82937	0.589015
Suprasolidus	3.8	24.2	2.30624	0	0.604706	1.75765	0.374285	2.73664		3.52022	21.4432	1.0289	0	0.269782	1.55742	0.346727	2.17393		4.07978	26.9568	3.58358	0	0.939631	1.95787	0.401842	3.29935				2.73664	0.562709
Suprasolidus	4.6	28	2.16786	0	0.568424	2.03364	0.453082	3.05515		4.2859	24.9525	0.77625	0	0.203536	1.8123	0.422144	2.43798		4.9141	31.0475	3.55948	0	0.933311	2.25498	0.484019	3.67231				3.05515	0.617166
Suprasolidus	4.2	30.7	2.16786	0	0.568424	2.22974	0.413683	3.21185		3.89607	27.4548	0.703205	0	0.184383	1.99404	0.383747	2.56217		4.50393	33.9452	3.63252	0	0.952464	2.46544	0.443619	3.86152				3.21185	0.649677
Suprasolidus	4.8	29.3	2.81361	0	0.737741	2.12806	0.472781	3.33858		4.47703	26.1563	1.37225	0	0.359811	1.89973	0.44097	2.70051		5.12297	32.4437	4.25497	0	1.11567	2.35638	0.504592	3.97665				3.33858	0.638066
Suprasolidus	4.5	29.6	1.98336	0	0.520047	2.14985	0.443232	3.11313		4.18722	26.4344	0.550339	0	0.144301	1.91993	0.412424	2.47666		4.81278	32.7656	3.41639	0	0.895793	2.37976	0.47404	3.74959				3.11313	0.636468
Suprasolidus	5.3	35.5	2.30624	0	0.604706	2.57837	0.522029	3.7051		4.95292	31.9211	0.702026	0	0.184074	2.31843	0.487843	2.99035		5.64708	39.0789	3.91045	0	1.02534	2.8383	0.556215	4.41985				3.7051	0.71475
Suprasolidus	3.8	25.3	2.39849	0	0.628894	1.83754	0.374285	2.84072		3.51856	22.4576	1.08703	0	0.285024	1.63109	0.346564	2.26268		4.08144	28.1424	3.70995	0	0.972765	2.04398	0.402006	3.41876				2.84072	0.578037
Suprasolidus	4.9	32.1	1.93724	0	0.507953	2.33142	0.48263	3.32201		4.57033	28.7551	0.432603	0	0.11343	2.08848	0.450159	2.65207		5.22967	35.4449	3.44188	0	0.902476	2.57437	0.515102	3.99194				3.32201	0.669936
Suprasolidus	3.9	28	2.90586	0	0.76193	2.03364	0.384134	3.1797		3.61055	24.9525	1.50621	0	0.394935	1.8123	0.355625	2.56286		4.18945	31.0475	4.30551	0	1.12892	2.25498	0.412644	3.79655				3.1797	0.616844
Suprasolidus	4.05	33.2	2.3	0	0.60307	2.41132	0.398909	3.4133		3.74763	29.7782	0.765663	0	0.20076	2.16279	0.369126	2.73268		4.35237	36.6218	3.83434	0	1.00538	2.65984	0.428691	4.09391				3.4133	0.68062
Suprasolidus	4.8	38.4	1.9	0	0.498189	2.78899	0.472781	3.75996		4.46487	34.6308	0.23034	0	0.0603961	2.51524	0.439772	3.0154		5.13513	42.1692	3.56966	0	0.935981	3.06275	0.50579	4.50452				3.75996	0.744556
Suprasolidus	4.35	35.5	2.3	0	0.60307	2.57837	0.428458	3.60989		4.03376	31.9212	0.702272	0	0.184139	2.31844	0.397309	2.89988		4.66624	39.0788	3.89773	0	1.022	2.83829	0.459606	4.3199				3.60989	0.710008
Suprasolidus	2.69	34	1.5	0	0.393307	2.46942	0.264954	3.12768		2.43746	30.5231	-0.0344627	0	-0.00903627	2.21689	0.24008	2.44794		2.94254	37.4769	3.03446	0	0.79565	2.72195	0.289829	3.80743				3.12768	0.679745
Suprasolidus	4.22	34.1	0	0	0	2.47668	0.415653	2.89234		3.91146	30.6162	-1.52734	0	-0.400474	2.22366	0.385263	2.20844		4.52854	37.5838	1.52734	0	0.400474	2.72971	0.446043	3.57623				2.89234	0.683892
Suprasolidus	3.72	29.6	2.1	0	0.55063	2.14985	0.366405	3.06688		3.43524	26.4345	0.670868	0	0.175905	1.91994	0.338357	2.4342		4.00476	32.7655	3.52913	0	0.925354	2.37976	0.394453	3.69957				3.06688	0.632684
Suprasolidus	3.9	32.8	2.6	0	0.681732	2.38226	0.384134	3.44813		3.60346	29.406	1.0726	0	0.281241	2.13576	0.354926	2.77193		4.19654	36.194	4.1274	0	1.08222	2.62877	0.413343	4.12433				3.44813	0.676205
Suprasolidus	3.92	36.7	2	0	0.524409	2.66552	0.386104	3.57603		3.61708	33.0414	0.37833	0	0.0991997	2.3998	0.356268	2.85527		4.22292	40.3586	3.62167	0	0.949618	2.93124	0.415941	4.2968				3.57603	0.720767
Suprasolidus	3.91	36.7	1.5	0	0.393307	2.66552	0.385119	3.44395		3.60769	33.0415	-0.114382	0	-0.0299916	2.3998	0.355343	2.72515		4.21231	40.3585	3.11438	0	0.816605	2.93124	0.414896	4.16274				3.44395	0.718794
Suprasolidus	3.63	39.9	1.9	0	0.498189	2.89794	0.35754	3.75367		3.33243	36.0357	0.200053	0	0.0524548	2.61727	0.328231	2.99796		3.92757	43.7643	3.59995	0	0.943922	3.1786	0.38685	4.50937				3.75367	0.755705
Suprasolidus	3.66	34.8	3.2	0	0.839055	2.52752	0.360495	3.72707		3.36875	31.2684	1.61066	0	0.422322	2.27102	0.331809	3.02516		3.95125	38.3316	4.78934	0	1.25579	2.78402	0.389182	4.42899				3.72707	0.701918
Suprasolidus	3.55	36.2	2.2	0	0.57685	2.62921	0.349661	3.55572		3.26104	32.5745	0.590798	0	0.15491	2.36589	0.3212	2.842		3.83896	39.8255	3.8092	0	0.99879	2.89252	0.378122	4.26944				3.55572	0.713719
Suprasolidus	3.23	39.2	2.47	0	0.647645	2.8471	0.318142	3.81288		2.94766	35.3799	0.781801	0	0.204992	2.56964	0.290333	3.06496		3.51234	43.0201	4.1582	0	1.0903	3.12455	0.345951	4.5608				3.81288	0.747919
Suprasolidus	3.41	38.4	1.4	0	0.367086	2.78899	0.335871	3.49195		3.12301	34.6309	-0.253744	0	-0.0665327	2.51524	0.307604	2.75632		3.69699	42.1691	3.05374	0	0.800705	3.06274	0.364139	4.22758				3.49195	0.735634
Suprasolidus	3.73	41.6	4.8	0	1.25858	3.02141	0.36739	4.64738		3.42492	37.6305	3.01236	0	0.789855	2.7331	0.337341	3.8603		4.03508	45.5695	6.58764	0	1.72731	3.30971	0.397439	5.43446				4.64738	0.787081
Suprasolidus	3.51	42.9	3.9	0	1.0226	3.11583	0.345721	4.48415		3.21096	38.8521	2.09795	0	0.550091	2.82183	0.316266	3.68818		3.80904	46.9479	5.70205	0	1.4951	3.40983	0.375175	5.28011				4.48415	0.795962
Suprasolidus	3.33	38.6	3	0	0.786614	2.80352	0.327992	3.91812		3.04474	34.818	1.31812	0	0.345618	2.52883	0.299894	3.17435		3.61526	42.382	4.68188	0	1.22761	3.0782	0.356089	4.6619				3.91812	0.743776
Suprasolidus	2.71	37.2	3	0	0.786614	2.70184	0.266924	3.75537		2.45004	33.5087	1.35752	0	0.355948	2.43373	0.24132	3.031		2.96996	40.8913	4.64248	0	1.21728	2.96994	0.292529	4.47975				3.75537	0.724373
Suprasolidus	3.02	37.6	3.8	0	0.996377	2.73089	0.297458	4.02472		2.74738	33.8825	2.13209	0	0.559045	2.46089	0.270606	3.29054		3.29262	41.3175	5.46791	0	1.43371	3.00089	0.32431	4.75891				4.02472	0.734184
Suprasolidus	3.4	33	0	0	0	2.39679	0.334886	2.73168		3.12299	29.5922	-1.49125	0	-0.391012	2.14928	0.307602	2.06587		3.67701	36.4078	1.49125	0	0.391012	2.6443	0.362171	3.39748				2.73168	0.665804
Suprasolidus	3.26	40.4	1.7	0	0.445748	2.93425	0.321097	3.7011		2.97501	36.5045	-0.00737748	0	-0.00193441	2.65132	0.293026	2.94242		3.54499	44.2955	3.40738	0	0.89343	3.21718	0.349168	4.45978				3.7011	0.75868
Suprasolidus	3.33	45.5	2.6	0	0.681732	3.30467	0.327992	4.31439		3.03377	41.3003	0.758057	0	0.198766	2.99964	0.298814	3.49722		3.62623	49.6997	4.44194	0	1.1647	3.60969	0.357169	5.13156				4.31439	0.817167
Suprasolidus	3.71	42.1	2.1	0	0.55063	3.05772	0.36542	3.97377		3.40607	38.1002	0.342746	0	0.0898694	2.76722	0.335484	3.19257		4.01393	46.0998	3.85725	0	1.01139	3.34823	0.395356	4.75497				3.97377	0.781201
Suprasolidus	3.28	41	2.4	0	0.629291	2.97783	0.323067	3.93019		2.99292	37.0674	0.667853	0	0.175114	2.6922	0.294791	3.16211		3.56708	44.9326	4.13215	0	1.08347	3.26346	0.351343	4.69827				3.93019	0.76808
Suprasolidus	3.82	41.7	2.2	0	0.57685	3.02867	0.376255	3.98178		3.5128	37.7245	0.450369	0	0.118089	2.73993	0.345997	3.20401		4.1272	45.6755	3.94963	0	1.03561	3.31741	0.406512	4.75954				3.98178	0.777761
Suprasolidus	3.54	38.9	1.6	0	0.419527	2.82531	0.348676	3.59351		3.2474	35.0989	-0.0700452	0	-0.0183662	2.54924	0.319856	2.85073		3.8326	42.7011	3.27005	0	0.857421	3.10138	0.377496	4.33629				3.59351	0.742785
Suprasolidus	2.94	36.3	2.6	0	0.681732	2.63647	0.289578	3.60778		2.67324	32.6679	0.985853	0	0.258495	2.37267	0.263303	2.89447		3.20676	39.9321	4.21415	0	1.10497	2.90027	0.315853	4.32109				3.60778	0.71331
Suprasolidus	3.6	37.3	1.8	0	0.471968	2.7091	0.354586	3.53565		3.30768	33.6021	0.167776	0	0.0439917	2.44052	0.325794	2.81031		3.89232	40.9979	3.43222	0	0.899945	2.97768	0.383378	4.261				3.53565	0.725345
Suprasolidus	2.86	38.6	2.5	0	0.655511	2.80352	0.281699	3.74073		2.59227	34.8181	0.828719	0	0.217294	2.52884	0.255328	3.00146		3.12773	42.3819	4.17128	0	1.09373	3.0782	0.308069	4.48				3.74073	0.739268
Suprasolidus	3.13	41.3	2.4	0	0.629291	2.99962	0.308292	3.9372		2.84783	37.3489	0.661399	0	0.173422	2.71265	0.2805	3.16658		3.41217	45.2511	4.1386	0	1.08516	3.28658	0.336085	4.70783				3.9372	0.770627
Suprasolidus	3.73	48.8	2.7	0	0.707952	3.54434	0.36739	4.61969		3.4149	44.4173	0.780953	0	0.204769	3.22603	0.336354	3.76715		4.0451	53.1827	4.61905	0	1.21114	3.86266	0.398426	5.47222				4.61969	0.852534
Suprasolidus	3.22	44.2	2.1	0	0.55063	3.21025	0.317157	4.07803		2.92999	40.0754	0.295639	0	0.0775179	2.91068	0.288593	3.27679		3.51001	48.3246	3.90436	0	1.02374	3.50982	0.345722	4.87928				4.07803	0.801246
Suprasolidus	3.02	35.6	3.1	0	0.812834	2.58563	0.297458	3.69592		2.75117	32.0145	1.4955	0	0.392126	2.32522	0.270979	2.98832		3.28883	39.1855	4.7045	0	1.23354	2.84604	0.323937	4.40352				3.69592	0.707598
Suprasolidus	4.78	56.6	1.5	0	0.393307	4.11086	0.470811	4.97498		4.42128	51.8281	-0.568211	0	-0.148987	3.76428	0.435478	4.05077		5.13872	61.3719	3.56821	0	0.935601	4.45744	0.506144	5.89919				4.97498	0.92421
Suprasolidus	3.37	44.7	2.1	0	0.55063	3.24656	0.331932	4.12912		3.0739	40.5463	0.283107	0	0.0742318	2.94488	0.302766	3.32188		3.6661	48.8537	3.91689	0	1.02703	3.54824	0.361097	4.93637				4.12912	0.807245
Suprasolidus	3.25	45.8	2.5	0	0.655511	3.32645	0.320112	4.30208		2.95614	41.5832	0.653033	0	0.171228	3.02019	0.291168	3.48259		3.54386	50.0168	4.34697	0	1.13979	3.63272	0.349056	5.12157				4.30208	0.819491
Suprasolidus	3.05	40.1	3	0	0.786614	2.91246	0.300413	3.99949		2.77243	36.2232	1.28238	0	0.336245	2.63089	0.273074	3.24021		3.32757	43.9768	4.71762	0	1.23698	3.19404	0.327752	4.75877				3.99949	0.75928
Suprasolidus	3.24	35.1	3.4	0	0.891495	2.54931	0.319127	3.75994		2.96363	31.5481	1.80209	0	0.472517	2.29134	0.291906	3.05576		3.51637	38.6519	4.99791	0	1.31047	2.80728	0.346348	4.46411				3.75994	0.704171
Suprasolidus	3.18	37.2	3.1	0	0.812834	2.70184	0.313217	3.82789		2.9025	33.5086	1.45304	0	0.380992	2.43373	0.285885	3.10061		3.4575	40.8914	4.74696	0	1.24468	2.96994	0.34055	4.55517				3.82789	0.727279
Suprasolidus	3.37	36.6	2.9	0	0.760393	2.65826	0.331932	3.75058		3.08661	32.948	1.27054	0	0.333143	2.39302	0.304018	3.03018		3.65339	40.252	4.52946	0	1.18764	2.9235	0.359845	4.47099				3.75058	0.720406
Suprasolidus	3.1	31.5	1.25	0	0.327756	2.28785	0.305338	2.92094		2.8362	28.1977	-0.214489	0	-0.0562399	2.048	0.279354	2.27111		3.3638	34.8023	2.71449	0	0.711751	2.52769	0.331321	3.57076				2.92094	0.649826
Suprasolidus	3.12	36.5	1.8	0	0.471968	2.65099	0.307308	3.43027		2.84662	32.8547	0.191689	0	0.0502617	2.38624	0.280381	2.71688		3.39338	40.1453	3.40831	0	0.893675	2.91575	0.334234	4.14366				3.43027	0.713391
Suprasolidus	2.8	37.7	2.1	0	0.55063	2.73815	0.275789	3.56457		2.53631	33.9761	0.45807	0	0.120108	2.46769	0.249816	2.83761		3.06369	41.4239	3.74193	0	0.981151	3.00862	0.301761	4.29153				3.56457	0.72696
Suprasolidus	3.77	40.9	1.3	0	0.340866	2.97057	0.37133	3.68276		3.46624	36.9736	-0.417598	0	-0.109496	2.68539	0.341411	2.9173		4.07376	44.8264	3.0176	0	0.791228	3.25575	0.401249	4.44822				3.68276	0.765459
Suprasolidus	4.12	44.5	2.6	0	0.681732	3.23204	0.405804	4.31957		3.79818	40.3579	0.776522	0	0.203607	2.93119	0.374105	3.5089		4.44182	48.6421	4.42348	0	1.15986	3.53288	0.437502	5.13024				4.31957	0.810666
Suprasolidus	3.43	38.8	1.1	0	0.288425	2.81804	0.337841	3.44431		3.1418	35.0053	-0.560111	0	-0.146864	2.54244	0.309455	2.70503		3.7182	42.5947	2.76011	0	0.723714	3.09365	0.366228	4.18359				3.44431	0.739281
Suprasolidus	3.28	38.8	3.1	0	0.812834	2.81804	0.323067	3.95394		2.99618	35.0053	1.41181	0	0.370184	2.54243	0.295111	3.20773		3.56382	42.5947	4.78819	0	1.25548	3.09366	0.351022	4.70016				3.95394	0.746217
Suprasolidus	3.69	43.1	2.2	0	0.57685	3.13035	0.36345	4.07065		3.38516	39.0402	0.417516	0	0.109475	2.83549	0.333425	3.27839		3.99484	47.1598	3.98248	0	1.04423	3.42522	0.393475	4.86292				4.07065	0.792263
Suprasolidus	4.15	39.3	2.1	0	0.55063	2.85436	0.408758	3.81375		3.83509	35.4735	0.408955	0	0.10723	2.57644	0.377741	3.06141		4.46491	43.1265	3.79104	0	0.994029	3.13228	0.439775	4.56608				3.81375	0.752336
Suprasolidus	3.63	39.7	3.1	0	0.812834	2.88341	0.35754	4.05379		3.33214	35.8482	1.38721	0	0.363733	2.60366	0.328203	3.29559		3.92786	43.5518	4.81279	0	1.26194	3.16316	0.386878	4.81198				4.05379	0.758192
Suprasolidus	2.98	40.5	2	0	0.524409	2.94152	0.293518	3.75944		2.70485	36.5983	0.287659	0	0.0754256	2.65814	0.266417	2.99998		3.25515	44.4017	3.71234	0	0.973393	3.22489	0.320619	4.51891				3.75944	0.759463
Suprasolidus	3.08	39.9	2.8	0	0.734173	2.89794	0.303368	3.93548		2.80178	36.0357	1.09023	0	0.285863	2.61727	0.275964	3.1791		3.35822	43.7643	4.50977	0	1.18248	3.1786	0.330771	4.69185				3.93548	0.756375
Suprasolidus	3.31	45.5	2.9	0	0.760393	3.30467	0.326022	4.39108		3.01432	41.3003	1.05394	0	0.276348	2.99964	0.296898	3.57289		3.60568	49.6997	4.74606	0	1.24444	3.60969	0.355145	5.20927				4.39108	0.818193
Suprasolidus	3.41	35.9	1	0	0.262205	2.60742	0.335871	3.20549		3.12732	32.2946	-0.583109	0	-0.152894	2.34555	0.308028	2.50069		3.69268	39.5054	2.58311	0	0.677303	2.86928	0.363715	3.9103				3.20549	0.704805
Suprasolidus	3.48	36.7	4	0	1.04882	2.66552	0.342766	4.05711		3.19189	33.0414	2.34866	0	0.61583	2.3998	0.314388	3.33002		3.76811	40.3586	5.65134	0	1.48181	2.93125	0.371144	4.7842				4.05711	0.72709
Suprasolidus	3.51	40.7	3	0	0.786614	2.95604	0.345721	4.08838		3.21487	36.7859	1.26487	0	0.331655	2.67176	0.316652	3.32006		3.80513	44.6141	4.73513	0	1.24157	3.24033	0.37479	4.85669				4.08838	0.768312
Suprasolidus	3.12	36.7	2.6	0	0.681732	2.66552	0.307308	3.65456		2.84583	33.0415	0.974325	0	0.255472	2.3998	0.280303	2.93558		3.39417	40.3585	4.22568	0	1.10799	2.93124	0.334312	4.37354				3.65456	0.718983
Suprasolidus	2.5	29.7	1.7	0	0.445748	2.15711	0.24624	2.8491		2.26264	26.5273	0.283398	0	0.0743082	1.92668	0.222861	2.22385		2.73736	32.8727	3.1166	0	0.817187	2.38754	0.269619	3.47435				2.8491	0.625252
Suprasolidus	3.45	36.6	3.6	0	0.943936	2.65826	0.339811	3.94201		3.16333	32.948	1.95837	0	0.513493	2.39301	0.311575	3.21808		3.73667	40.252	5.24163	0	1.37438	2.9235	0.368047	4.66593				3.94201	0.723923
Suprasolidus	4.44	44.5	3.7	0	0.970157	3.23204	0.437322	4.63951		4.10714	40.3578	1.85843	0	0.487288	2.93119	0.404536	3.82301		4.77286	48.6422	5.54157	0	1.45303	3.53288	0.470108	5.45602				4.63951	0.816502
Suprasolidus	3.67	38.2	3.1	0	0.812834	2.77447	0.36148	3.94878		3.37308	34.4437	1.4245	0	0.37351	2.50165	0.332235	3.20739		3.96692	41.9563	4.7755	0	1.25216	3.04729	0.390726	4.69017				3.94878	0.741389
Suprasolidus	3.82	36.3	2.7	0	0.707952	2.63647	0.376255	3.72068		3.52089	32.6679	1.07862	0	0.282818	2.37267	0.346794	3.00228		4.11911	39.9321	4.32138	0	1.13309	2.90027	0.405716	4.43907				3.72068	0.718398
Suprasolidus	3.5	39.4	2.9	0	0.760393	2.86162	0.344736	3.96675		3.20735	35.5672	1.19859	0	0.314275	2.58324	0.315912	3.21343		3.79265	43.2328	4.60141	0	1.20651	3.14	0.37356	4.72007				3.96675	0.753321
Suprasolidus	4.37	41.4	3.3	0	0.865275	3.00688	0.430428	4.30258		4.04404	37.4427	1.53798	0	0.403264	2.71946	0.398322	3.52105		4.69596	45.3573	5.06202	0	1.32729	3.2943	0.462533	5.08412				4.30258	0.781534
Suprasolidus	3.12	42.6	2.5	0	0.655511	3.09404	0.307308	4.05686		2.83597	38.5701	0.728578	0	0.191036	2.80135	0.279332	3.27171		3.40403	46.6299	4.27142	0	1.11999	3.38673	0.335283	4.842				4.05686	0.785142
Suprasolidus	3.12	42.6	2.5	0	0.655511	3.09404	0.307308	4.05686		2.83597	38.5701	0.728578	0	0.191036	2.80135	0.279332	3.27171		3.40403	46.6299	4.27142	0	1.11999	3.38673	0.335283	4.842				4.05686	0.785142
Suprasolidus	3.47	41.9	3.2	0	0.839055	3.0432	0.341781	4.22403		3.17428	37.9123	1.43294	0	0.375724	2.75357	0.312654	3.44195		3.76572	45.8877	4.96706	0	1.30238	3.33282	0.370909	5.00612				4.22403	0.782085
Suprasolidus	3.8	65.8	5.4	0	1.4159	4.77905	0.374285	6.56924		3.45878	60.6472	3.13095	0	0.82095	4.40481	0.340676	5.56643		4.14122	70.9528	7.66905	0	2.01086	5.1533	0.407894	7.57205				6.56924	1.00281
Suprasolidus	3.69	51.5	4	0	1.04882	3.74045	0.36345	5.15271		3.3717	46.9757	2.00601	0	0.525985	3.41184	0.332099	4.26993		4.0083	56.0243	5.99399	0	1.57165	4.06905	0.394801	6.0355				5.15271	0.882786
Suprasolidus	4.12	36.6	0	0	0	2.65826	0.405804	3.06406		3.81122	32.9481	-1.59385	0	-0.417914	2.39302	0.37539	2.3505		4.42878	40.2519	1.59385	0	0.417914	2.92349	0.436217	3.77763				3.06406	0.713564
Suprasolidus	3.74	33.9	1.4	0	0.367086	2.46216	0.368375	3.19762		3.44819	30.4299	-0.137279	0	-0.035995	2.21012	0.339633	2.51376		4.03181	37.3701	2.93728	0	0.770168	2.71419	0.397117	3.88147				3.19762	0.683856
Suprasolidus	2.86	28.9	0	0	0	2.09901	0.281699	2.38071		2.61083	25.786	-1.37048	0	-0.359347	1.87284	0.257156	1.77065		3.10917	32.014	1.37048	0	0.359347	2.32518	0.306241	2.99077				2.38071	0.61006
Suprasolidus	3.74	32.9	0	0	0	2.38953	0.368375	2.7579		3.4505	29.4992	-1.49087	0	-0.390914	2.14252	0.339861	2.09147		4.0295	36.3008	1.49087	0	0.390914	2.63653	0.396889	3.42433				2.7579	0.666431
Suprasolidus	3.23	40.6	2.6	0	0.681732	2.94878	0.318142	3.94865		2.94528	36.6921	0.875045	0	0.229441	2.66495	0.290098	3.18448		3.51472	44.5079	4.32495	0	1.13402	3.23261	0.346186	4.71282				3.94865	0.764167
Suprasolidus	3.57	30.3	1.6	0	0.419527	2.20069	0.351631	2.97185		3.29004	27.0837	0.16046	0	0.0420734	1.96709	0.324056	2.33322		3.84996	33.5163	3.03954	0	0.796981	2.43429	0.379206	3.61048				2.97185	0.63863
Suprasolidus	4.6	33.9	2	0	0.524409	2.46216	0.453082	3.43965		4.27773	30.4298	0.447703	0	0.11739	2.21012	0.421339	2.74885		4.92227	37.3702	3.5523	0	0.931428	2.7142	0.484824	4.13045				3.43965	0.6908
Suprasolidus	3.45	28.19	0	0	0	2.04744	0.339811	2.38725		3.17886	25.1285	-1.3541	0	-0.355051	1.82508	0.313105	1.78314		3.72114	31.2515	1.3541	0	0.355051	2.26979	0.366517	2.99136				2.38725	0.604111
Suprasolidus	3.82	30.8	1.5	0	0.393307	2.237	0.376255	3.00657		3.53001	27.5476	0.0461417	0	0.0120986	2.00079	0.347692	2.36058		4.10999	34.0524	2.95386	0	0.774515	2.47322	0.404817	3.65255				3.00657	0.645989
Suprasolidus	5.52	39	3.3	0	0.865275	2.83257	0.543698	4.24154		5.1613	35.1924	1.58955	0	0.416786	2.55602	0.508368	3.48118		5.8787	42.8076	5.01045	0	1.31376	3.10912	0.579028	5.00191				4.24154	0.760365
Suprasolidus	4.6	38.1	2.5	0	0.655511	2.7672	0.453082	3.8758		4.27153	34.3501	0.830418	0	0.217739	2.49485	0.420728	3.13332		4.92847	41.8499	4.16958	0	1.09328	3.03956	0.485435	4.61827				3.8758	0.742479
Suprasolidus	4.54	39.2	1.1	0	0.288425	2.8471	0.447172	3.58269		4.2126	35.3798	-0.577393	0	-0.151395	2.56964	0.414924	2.83317		4.8674	43.0202	2.77739	0	0.728245	3.12455	0.479419	4.33222				3.58269	0.749526
Suprasolidus	4.62	33.8	2.5	0	0.655511	2.45489	0.455052	3.56546		4.29697	30.3367	0.942304	0	0.247076	2.20335	0.423234	2.87366		4.94303	37.2633	4.0577	0	1.06395	2.70644	0.486869	4.25725				3.56546	0.691794
Suprasolidus	4.79	38.5	1.9	0	0.498189	2.79626	0.471796	3.76624		4.45505	34.7244	0.227869	0	0.0597482	2.52203	0.438805	3.02059		5.12495	42.2756	3.57213	0	0.936629	3.07048	0.504787	4.51189				3.76624	0.745652
Suprasolidus	4.43	36.6	1.8	0	0.471968	2.65826	0.436337	3.56656		4.10968	32.948	0.180473	0	0.0473207	2.39301	0.404787	2.84512		4.75032	40.252	3.41953	0	0.896616	2.9235	0.467887	4.288				3.56656	0.721441
Suprasolidus	4.92	33.7	2.4	0	0.629291	2.44763	0.4846	3.56152		4.58727	30.2435	0.844517	0	0.221436	2.19659	0.451828	2.86985		5.25273	37.1565	3.95548	0	1.03715	2.69867	0.517373	4.25319				3.56152	0.691669
Suprasolidus	4.22	36.9	2.5	0	0.655511	2.68005	0.415653	3.75121		3.90606	33.2283	0.863591	0	0.226437	2.41337	0.384732	3.02454		4.53394	40.5717	4.13641	0	1.08459	2.94673	0.446575	4.47789				3.75121	0.726675
Suprasolidus	4.33	37	2	0	0.524409	2.68731	0.426488	3.63821		4.01239	33.3217	0.367835	0	0.0964479	2.42016	0.395205	2.91181		4.64761	40.6783	3.63217	0	0.95237	2.95446	0.457771	4.36461				3.63821	0.726399
Suprasolidus	5.21	41.4	5.4	0	1.4159	3.00688	0.513164	4.93595		4.85663	37.4426	3.59761	0	0.943309	2.71946	0.478359	4.14112		5.56337	45.3574	7.20239	0	1.8885	3.29431	0.547969	5.73078				4.93595	0.794826
Suprasolidus	4.25	33.5	2	0	0.524409	2.4331	0.418608	3.37612		3.94029	30.0574	0.460921	0	0.120856	2.18307	0.388103	2.69203		4.55971	36.9426	3.53908	0	0.927963	2.68314	0.449113	4.06022				3.37612	0.684095
Suprasolidus	4	36.6	1.2	0	0.314645	2.65826	0.393984	3.36689		3.69482	32.9481	-0.408213	0	-0.107035	2.39302	0.363925	2.64991		4.30518	40.2519	2.80821	0	0.736326	2.9235	0.424043	4.08387				3.36689	0.716979
Suprasolidus	4.34	31	4	0	1.04882	2.25153	0.427473	3.72782		4.02985	27.7332	2.49301	0	0.653679	2.01426	0.396924	3.06486		4.65015	34.2668	5.50699	0	1.44396	2.4888	0.458021	4.39078				3.72782	0.662958
Suprasolidus	3.5	34.3	1.8	0	0.471968	2.49121	0.344736	3.30791		3.21615	30.8025	0.247616	0	0.0649261	2.23719	0.316778	2.61889		3.78385	37.7975	3.35238	0	0.87901	2.74523	0.372694	3.99694				3.30791	0.689023
Suprasolidus	4.3	40.6	4	0	1.04882	2.94878	0.423533	4.42113		3.97724	36.692	2.24648	0	0.589038	2.66494	0.391742	3.64572		4.62276	44.508	5.75352	0	1.5086	3.23262	0.455323	5.19654				4.42113	0.775411
Suprasolidus	5.31	48.8	2.8	0	0.734173	3.54434	0.523014	4.80153		4.94489	44.4172	0.870771	0	0.22832	3.22602	0.487052	3.9414		5.67511	53.1828	4.72923	0	1.24003	3.86266	0.558975	5.66167				4.80153	0.860135
Suprasolidus	4.2	33.7	1.1	0	0.288425	2.44763	0.413683	3.14974		3.8922	30.2436	-0.430758	0	-0.112947	2.1966	0.383366	2.46702		4.5078	37.1564	2.63076	0	0.689797	2.69867	0.444	3.83246				3.14974	0.682724
Suprasolidus	3.74	29.9	2.4	0	0.629291	2.17164	0.368375	3.1693		3.45387	26.7126	0.957122	0	0.250962	1.94014	0.340192	2.53129		4.02613	33.0874	3.84288	0	1.00762	2.40314	0.396558	3.80731				3.1693	0.638011
Suprasolidus	2.71	26.5	1.4	0	0.367086	1.9247	0.266924	2.55871		2.47017	23.5657	0.0798085	0	0.0209261	1.71157	0.243302	1.9758		2.94983	29.4343	2.72019	0	0.713247	2.13782	0.290546	3.14161				2.55871	0.582902
Suprasolidus	4.57	32.7	2.7	0	0.707952	2.375	0.450127	3.53308		4.25011	29.3129	1.1689	0	0.306491	2.129	0.418619	2.85411		4.88989	36.0871	4.2311	0	1.10941	2.621	0.481635	4.21205				3.53308	0.678971
Suprasolidus	4.61	34.1	2.2	0	0.57685	2.47668	0.454067	3.5076		4.28702	30.6161	0.639156	0	0.16759	2.22365	0.422254	2.81349		4.93298	37.5839	3.76084	0	0.98611	2.72972	0.485879	4.20171				3.5076	0.694109
Suprasolidus	4.4	33.3	2.6	0	0.681732	2.41858	0.433382	3.53369		4.08509	29.8712	1.0556	0	0.276783	2.16955	0.402365	2.84869		4.71491	36.7288	4.1444	0	1.08668	2.66761	0.464399	4.21869				3.53369	0.684999
Suprasolidus	4.77	30.7	1.1	0	0.288425	2.22974	0.469826	2.98799		4.44694	27.4548	-0.352001	0	-0.0922964	1.99404	0.438006	2.33975		5.09306	33.9452	2.552	0	0.669146	2.46544	0.501646	3.63623				2.98799	0.648241
Suprasolidus	3.98	33.4	3	0	0.786614	2.42584	0.392014	3.60447		3.67947	29.9643	1.44909	0	0.379959	2.17631	0.362414	2.91868		4.28053	36.8357	4.55091	0	1.19327	2.67538	0.421615	4.29026				3.60447	0.685791
Suprasolidus	5.02	32.2	2.9	0	0.760393	2.33869	0.49445	3.59353		4.68586	28.848	1.37582	0	0.360745	2.09523	0.461539	2.91751		5.35414	35.552	4.42418	0	1.16004	2.58214	0.527361	4.26955				3.59353	0.676016
Suprasolidus	3.69	27.7	3.1	0	0.812834	2.01185	0.36345	3.18814		3.40875	24.6749	1.70676	0	0.44752	1.79214	0.335748	2.57541		3.97125	30.7251	4.49324	0	1.17815	2.23156	0.391152	3.80086				3.18814	0.612727
Suprasolidus	3.88	29.1	2.7	0	0.707952	2.11353	0.382164	3.20365		3.58975	25.9711	1.27323	0	0.333846	1.88628	0.353576	2.5737		4.17025	32.2289	4.12677	0	1.08206	2.34079	0.410753	3.8336				3.20365	0.629948
Suprasolidus	4.33	29.7	1.1	0	0.288425	2.15711	0.426488	2.87202		4.02346	26.5272	-0.320442	0	-0.0840214	1.92667	0.396295	2.23894		4.63654	32.8728	2.52044	0	0.660871	2.38755	0.45668	3.5051				2.87202	0.633079
Suprasolidus	4.96	33.1	2	0	0.524409	2.40405	0.48854	3.417		4.62698	29.6851	0.466738	0	0.122381	2.15603	0.455739	2.73415		5.29302	36.5149	3.53326	0	0.926437	2.65208	0.521341	4.09986				3.417	0.682855
Suprasolidus	3.53	26.2	1.7	0	0.445748	1.90291	0.347691	2.69634		3.25792	23.2885	0.377151	0	0.0988907	1.69144	0.320892	2.11122		3.80208	29.1115	3.02285	0	0.792605	2.11437	0.374489	3.28146				2.69634	0.58512
Suprasolidus	4.25	31.1	1.1	0	0.288425	2.25879	0.418608	2.96583		3.94426	27.8261	-0.359354	0	-0.0942241	2.02101	0.388494	2.31528		4.55574	34.3739	2.55935	0	0.671074	2.49657	0.448722	3.61637				2.96583	0.650543
Suprasolidus	5.08	31.8	1.4	0	0.367086	2.30963	0.50036	3.17708		4.74516	28.4763	-0.0893743	0	-0.0234344	2.06823	0.46738	2.51218		5.41484	35.1237	2.88937	0	0.757607	2.55104	0.53334	3.84198				3.17708	0.664903
Suprasolidus	4.63	30.3	1.3	0	0.340866	2.20069	0.456036	2.99759		4.31212	27.0836	-0.14274	0	-0.0374271	1.96708	0.424727	2.35438		4.94788	33.5164	2.74274	0	0.719159	2.43429	0.487346	3.6408				2.99759	0.643208
Suprasolidus	4.82	32.3	1.7	0	0.445748	2.34595	0.474751	3.26645		4.49279	28.941	0.194171	0	0.0509126	2.10199	0.442522	2.59542		5.14721	35.659	3.20583	0	0.840583	2.58991	0.506979	3.93747				3.26645	0.671027
Suprasolidus	5.51	36.5	1.7	0	0.445748	2.65099	0.542713	3.63946		5.15554	32.8546	0.0773703	0	0.0202869	2.38623	0.5078	2.91431		5.86446	40.1454	3.32263	0	0.871209	2.91576	0.577626	4.3646				3.63946	0.725141
Suprasolidus	3.19	18.58	1.03319	0	0.270908	1.34947	0.314202	1.93458		2.94348	16.2796	-0.0422163	0	-0.0110693	1.18239	0.289921	1.46124		3.43652	20.8804	2.10861	0	0.552886	1.51654	0.338483	2.40791				1.93458	0.473334
Suprasolidus	4.61	21.83	1.04703	0	0.274537	1.58551	0.454067	2.31412		4.3043	19.2618	-0.142623	0	-0.0373964	1.39898	0.423956	1.78554		4.9157	24.3982	2.23669	0	0.58647	1.77204	0.484177	2.84269				2.31412	0.528573
Suprasolidus	3.75	25.02	0.691871	0	0.181412	1.8172	0.36936	2.36797		3.47183	22.1993	-0.580746	0	-0.152274	1.61234	0.341961	1.80203		4.02817	27.8407	1.96449	0	0.515098	2.02207	0.396759	2.93392				2.36797	0.565949
Suprasolidus	5.02	29.1	1.10699	0	0.290259	2.11353	0.49445	2.89824		4.69084	25.9711	-0.301742	0	-0.0791181	1.88628	0.462029	2.26919		5.34916	32.2289	2.51573	0	0.659636	2.34079	0.52687	3.52729				2.89824	0.629051
Suprasolidus	4.73	31.76	1.66972	0	0.437807	2.30673	0.465886	3.21042		4.40654	28.4391	0.179848	0	0.0471569	2.06553	0.434026	2.54672		5.05346	35.0809	3.15959	0	0.828458	2.54792	0.497746	3.87413				3.21042	0.663705
Suprasolidus	5.34	33.04	2.73059	0	0.715972	2.3997	0.525969	3.64164		4.99476	29.6292	1.18444	0	0.310567	2.15197	0.491964	2.9545		5.68524	36.4508	4.27673	0	1.12138	2.64742	0.559973	4.32877				3.64164	0.687137
Suprasolidus	5.33	32.62	1.57747	0	0.413619	2.36919	0.524984	3.30779		4.98614	29.2385	0.0611491	0	0.0160336	2.1236	0.491114	2.63074		5.67386	36.0015	3.09378	0	0.811204	2.61479	0.558853	3.98484				3.30779	0.67705
Suprasolidus	4.97	30.83	1.5913	0	0.417247	2.23918	0.489525	3.14596		4.63993	27.5754	0.126682	0	0.0332167	2.0028	0.457015	2.49303		5.30007	34.0846	3.05593	0	0.801278	2.47556	0.522036	3.79888				3.14596	0.652922
Suprasolidus	4.64	30.86	1.43448	0	0.376127	2.24136	0.457021	3.07451		4.32093	27.6033	-0.0261063	0	-0.00684519	2.00483	0.425595	2.42358		4.95907	34.1167	2.89507	0	0.7591	2.4779	0.488448	3.72544				3.07451	0.650934
Suprasolidus	5.28	33.19	1.9603	0	0.514	2.41059	0.520059	3.44465		4.93676	29.7688	0.422999	0	0.110912	2.16211	0.486251	2.75927		5.62324	36.6112	3.49761	0	0.917088	2.65907	0.553867	4.13003				3.44465	0.685377
Suprasolidus	4.79	29.29	1.68817	0	0.442645	2.12733	0.471796	3.04177		4.46791	26.1471	0.266575	0	0.0698971	1.89907	0.440072	2.40903		5.11209	32.4329	3.10976	0	0.815393	2.3556	0.50352	3.67451				3.04177	0.63274
Suprasolidus	4.68	27.7	1.52673	0	0.400315	2.01185	0.460961	2.87313		4.36388	24.6749	0.154051	0	0.0403928	1.79214	0.429824	2.26236		4.99612	30.7251	2.89941	0	0.760238	2.23156	0.492098	3.4839				2.87313	0.61077
Suprasolidus	4.99	28.35	1.49905	0	0.393059	2.05906	0.491495	2.94361		4.66263	25.2765	0.105756	0	0.0277296	1.83583	0.459251	2.32281		5.31737	31.4235	2.89235	0	0.758388	2.28229	0.52374	3.56442				2.94361	0.620806
Suprasolidus	3.76	21.01	0.936333	0	0.245511	1.52596	0.370345	2.14181		3.48709	18.5084	-0.218344	0	-0.0572507	1.34427	0.343465	1.63048		4.03291	23.5116	2.09101	0	0.548272	1.70765	0.397225	2.65314				2.14181	0.511332
Suprasolidus	5.46	28.35	1.75735	0	0.460786	2.05906	0.537788	3.05763		5.11756	25.2764	0.35621	0	0.0933998	1.83583	0.504059	2.43328		5.80244	31.4236	3.1585	0	0.828172	2.2823	0.571517	3.68199				3.05763	0.62435
Suprasolidus	5.14	36.91	1.96491	0	0.51521	2.68077	0.506269	3.70225		4.79612	33.2376	0.330242	0	0.0865908	2.41404	0.472399	2.97303		5.48388	40.5824	3.59959	0	0.943828	2.9475	0.54014	4.43147				3.70225	0.729219
Suprasolidus	4.45	26.38	1.65588	0	0.434179	1.91598	0.438307	2.78847		4.14361	23.4547	0.321116	0	0.084198	1.70351	0.408129	2.19584		4.75639	29.3053	2.99064	0	0.78416	2.12845	0.468485	3.38109				2.78847	0.592626
Suprasolidus	4.79	29.18	2.04794	0	0.536979	2.11934	0.471796	3.12812		4.46789	26.0452	0.623468	0	0.163476	1.89166	0.440069	2.49521		5.11211	32.3148	3.47241	0	0.910482	2.34703	0.503522	3.76103				3.12812	0.632912
Suprasolidus	4.88	32.34	1.89573	0	0.497068	2.34885	0.48066	3.32658		4.55067	28.9782	0.385326	0	0.101034	2.10469	0.448223	2.65394		5.20933	35.7018	3.40613	0	0.893103	2.59302	0.513098	3.99922				3.32658	0.67264
Suprasolidus	4.7	29.74	1.13928	0	0.298725	2.16002	0.462931	2.92167		4.3806	26.5643	-0.285708	0	-0.0749138	1.92936	0.431471	2.28592		5.0194	32.9157	2.56427	0	0.672363	2.39067	0.494391	3.55742				2.92167	0.635752
Suprasolidus	5.4	41.43	2.26934	0	0.595031	3.00906	0.531878	4.13597		5.04207	37.4709	0.515578	0	0.135187	2.72151	0.496624	3.35332		5.75793	45.3891	4.0231	0	1.05487	3.29661	0.567133	4.91862				4.13597	0.782651
Suprasolidus	4.55	34.2	1.57285	0	0.41241	2.48395	0.448157	3.34451		4.2292	30.7093	0.0193059	0	0.00506208	2.23042	0.416559	2.65204		4.8708	37.6907	3.1264	0	0.819757	2.73748	0.479755	4.03699				3.34451	0.692476
Suprasolidus	4.21	31.46	1.13006	0	0.296306	2.28494	0.414668	2.99591		3.90513	28.1605	-0.33951	0	-0.0890211	2.0453	0.38464	2.34091		4.51487	34.7595	2.59962	0	0.681633	2.52458	0.444696	3.65091				2.99591	0.655
Suprasolidus	4.61	34.39	1.50828	0	0.395478	2.49775	0.454067	3.34729		4.28694	30.8863	-0.0498377	0	-0.0130677	2.24327	0.422246	2.65245		4.93306	37.8937	3.0664	0	0.804023	2.75222	0.485887	4.04213				3.34729	0.694839
Suprasolidus	5.56	37.37	1.84038	0	0.482555	2.71418	0.547638	3.74438		5.20287	33.6674	0.192959	0	0.0505947	2.44527	0.512462	3.00832		5.91713	41.0726	3.4878	0	0.914516	2.9831	0.582814	4.48043				3.74438	0.736054
Suprasolidus	5.24	36.84	1.9972	0	0.523675	2.67569	0.516119	3.71548		4.89311	33.1722	0.363209	0	0.0952351	2.40929	0.481952	2.98648		5.58689	40.5078	3.6312	0	0.952116	2.94208	0.550286	4.44449				3.71548	0.729003
Suprasolidus	5.08	36.5	2.00643	0	0.526094	2.65099	0.50036	3.67745		4.73853	32.8546	0.382149	0	0.100201	2.38623	0.466726	2.95316		5.42147	40.1454	3.63071	0	0.951988	2.91576	0.533993	4.40174				3.67745	0.724293
Suprasolidus	4.7	32.44	1.51289	0	0.396687	2.35612	0.462931	3.21574		4.37667	29.0712	0.00694383	0	0.0018207	2.11144	0.431085	2.54435		5.02333	35.8088	3.01884	0	0.791554	2.60079	0.494778	3.88712				3.21574	0.671389
Suprasolidus	4.28	28.46	1.56824	0	0.4112	2.06705	0.421563	2.89981		3.97677	25.3783	0.176169	0	0.0461922	1.84323	0.391696	2.28112		4.58323	31.5417	2.96032	0	0.776208	2.29087	0.45143	3.51851				2.89981	0.618696
Suprasolidus	5.8	38.03	2.02949	0	0.532141	2.76212	0.571277	3.86554		5.43502	34.2846	0.361006	0	0.0946574	2.49009	0.535327	3.12007		6.16498	41.7754	3.69797	0	0.969625	3.03415	0.607226	4.611				3.86554	0.745463
Suprasolidus	4.47	27.61	1.54518	0	0.405153	2.00531	0.440277	2.85074		4.16126	24.5917	0.176447	0	0.0462651	1.7861	0.409868	2.24223		4.77874	30.6283	2.91391	0	0.764041	2.22453	0.470687	3.45926				2.85074	0.608517
Suprasolidus	4.58	26.75	1.66049	0	0.435388	1.94285	0.451112	2.82935		4.26855	23.7965	0.313832	0	0.0822882	1.72834	0.420435	2.23107		4.89145	29.7035	3.00715	0	0.788489	2.15736	0.481788	3.42764				2.82935	0.598287
Suprasolidus	4.58	29.68	1.46216	0	0.383384	2.15566	0.451112	2.99015		4.26461	26.5086	0.0347568	0	0.0091134	1.92532	0.420047	2.35448		4.89539	32.8514	2.88955	0	0.757654	2.38599	0.482176	3.62583				2.99015	0.635671
Suprasolidus	4.8	31.8	1.47138	0	0.385802	2.30963	0.472781	3.16822		4.47425	28.4763	-0.0170513	0	-0.00447092	2.06823	0.440696	2.50446		5.12575	35.1237	2.95981	0	0.776076	2.55103	0.504866	3.83198				3.16822	0.663759
Suprasolidus	5.1	30.42	1.64204	0	0.430551	2.2094	0.50233	3.14228		4.76625	27.1949	0.187101	0	0.0490586	1.97517	0.469457	2.49368		5.43375	33.6451	3.09698	0	0.812043	2.44364	0.535203	3.79089				3.14228	0.648604
Suprasolidus	5.37	34.27	1.95569	0	0.512791	2.48903	0.528924	3.53074		5.02257	30.7744	0.388881	0	0.101966	2.23515	0.494703	2.83182		5.71743	37.7656	3.5225	0	0.923615	2.74291	0.563144	4.22967				3.53074	0.698928
Suprasolidus	5.16	30.82	1.87728	0	0.492231	2.23846	0.508239	3.23893		4.8237	27.5661	0.406999	0	0.106717	2.00213	0.475115	2.58396		5.4963	34.0739	3.34756	0	0.877744	2.47479	0.541364	3.8939				3.23893	0.654969
Suprasolidus	3.36	21.06	1.10238	0	0.28905	1.52959	0.330947	2.14958		3.10281	18.5544	-0.0532707	0	-0.0139678	1.3476	0.305614	1.63925		3.61719	23.5656	2.25803	0	0.592067	1.71157	0.356279	2.65992				2.14958	0.510334
Suprasolidus	4.61	29.78	1.42987	0	0.374918	2.16292	0.454067	2.99191		4.29346	26.6013	-7.53769e-05	0	-1.97642e-05	1.93206	0.422889	2.35492		4.92654	32.9587	2.85981	0	0.749855	2.39379	0.485244	3.62889				2.99191	0.636981

## Sheet: Reynolds Range
					Units - micro watts m-3					heat production lower bound									heat production upper bound											heat production	1 sigma error
Sample	K2O (wt%)	Th (ppm)	U (ppm)	∆Time (Ma)	heat from U at nominated time	heat from Th at time	heat from K at time	total heat production at time (micro watts m-3)		K2O (wt%)	Th (ppm)	U (ppm)	∆Time (Ma)	heat from U at nominated time	heat from Th at time	heat from K at time	total heat production at time (micro watts m-3)		K2O (wt%)	Th (ppm)	U (ppm)	∆Time (Ma)	heat from U at nominated time	heat from Th at time	heat from K at time	total heat production at time (micro watts m-3)
Subsolidus	4.35	17.22	1.79425	0	0.470461	1.25069	0.428458	2.14961		4.05904	15.0346	0.733658	0	0.192368	1.09197	0.399799	1.68413		4.64096	19.4054	2.85485	0	0.748554	1.40941	0.457116	2.61508				2.14961	0.465475
Subsolidus	1.76	6.41	1.65127	0	0.43297	0.465558	0.173353	1.07188		1.59528	5.20593	0.958302	0	0.251271	0.378107	0.157129	0.786506		1.92472	7.61407	2.34423	0	0.614668	0.55301	0.189577	1.35726				1.07188	0.285374
Subsolidus	4.89	19.05	1.83115	0	0.480137	1.3836	0.481645	2.34538		4.57751	16.7101	0.708344	0	0.185731	1.21365	0.450867	1.85025		5.20249	21.3899	2.95396	0	0.774542	1.55355	0.512424	2.84052				2.34538	0.495135
Subsolidus	4.67	16.56	1.87728	0	0.492231	1.20275	0.459976	2.15496		4.36808	14.4311	0.831835	0	0.218111	1.04813	0.430239	1.69648		4.97192	18.6889	2.92272	0	0.766351	1.35737	0.489714	2.61344				2.15496	0.458476
Subsolidus	5.85	19.86	2.19093	0	0.574471	1.44243	0.576202	2.5931		5.50554	17.4526	1.02722	0	0.26934	1.26758	0.542274	2.0792		6.19446	22.2674	3.35464	0	0.879601	1.61728	0.610129	3.10701				2.5931	0.513906
Subsolidus	5.92	20.97	1.99259	0	0.522466	1.52305	0.583096	2.62861		5.57235	18.4714	0.799166	0	0.209545	1.34158	0.548854	2.09998		6.26765	23.4686	3.18601	0	0.835387	1.70452	0.617339	3.15725				2.62861	0.528635
Subsolidus	4.73	19.37	1.21308	0	0.318075	1.40684	0.465886	2.1908		4.42302	17.0034	0.0945645	0	0.0247953	1.23496	0.43565	1.6954		5.03698	21.7366	2.3316	0	0.611356	1.57873	0.496122	2.6862				2.1908	0.4954
Subsolidus	5.27	18.23	1.03319	0	0.270908	1.32404	0.519074	2.11403		4.94604	15.9589	-0.0518682	0	-0.0136001	1.1591	0.487166	1.63266		5.59396	20.5011	2.11826	0	0.555417	1.48899	0.550982	2.59539				2.11403	0.481367
Subsolidus	5.32	18.04	1.61437	0	0.423294	1.31025	0.523999	2.25754		4.99434	15.7849	0.522787	0	0.137077	1.14646	0.491922	1.77546		5.64566	20.2951	2.70595	0	0.709511	1.47403	0.556075	2.73962				2.25754	0.482082
Subsolidus	6.01	19.05	1.69278	0	0.443854	1.3836	0.591961	2.41942		5.66191	16.71	0.562385	0	0.14746	1.21364	0.557675	1.91878		6.35809	21.39	2.82317	0	0.740249	1.55356	0.626247	2.92005				2.41942	0.500637
Subsolidus	6.41	20.89	1.59592	0	0.418457	1.51724	0.631359	2.56706		6.04877	18.3979	0.408593	0	0.107135	1.33624	0.595779	2.03916		6.77123	23.3821	2.78324	0	0.729778	1.69824	0.666939	3.09496				2.56706	0.5279
Subsolidus	5.98	19.26	1.40219	0	0.367661	1.39885	0.589006	2.35552		5.63269	16.9025	0.27157	0	0.0712068	1.22763	0.554798	1.85363		6.32731	21.6175	2.53282	0	0.664116	1.57008	0.623214	2.85741				2.35552	0.50189
Subsolidus	5.55	17.94	1.33762	0	0.35073	1.30298	0.546653	2.20036		5.2172	15.6934	0.252627	0	0.0662401	1.13981	0.513873	1.71992		5.8828	20.1866	2.42261	0	0.635219	1.46616	0.579432	2.68081				2.20036	0.480443
Subsolidus	5.77	18.32	1.77119	0	0.464414	1.33058	0.568322	2.36332		5.42979	16.0412	0.663479	0	0.173967	1.16507	0.534812	1.87385		6.11021	20.5988	2.8789	0	0.754861	1.49609	0.601832	2.85278				2.36332	0.489465
Subsolidus	5.79	18.53	1.51289	0	0.396687	1.34583	0.570292	2.31281		5.44908	16.2336	0.403989	0	0.105928	1.17904	0.536712	1.82168		6.13092	20.8264	2.6218	0	0.687447	1.51262	0.603872	2.80394				2.31281	0.491129
Subsolidus	5.9	17.9	1.90957	0	0.500697	1.30008	0.581126	2.3819		5.55625	15.6567	0.810406	0	0.212492	1.13714	0.547268	1.8969		6.24375	20.1433	3.00872	0	0.788901	1.46301	0.614985	2.8669				2.3819	0.484996
Subsolidus	6.1	18.75	1.57285	0	0.41241	1.36181	0.600826	2.37505		5.74967	16.4351	0.453197	0	0.11883	1.19368	0.566319	1.87883		6.45033	21.0649	2.69251	0	0.705989	1.52995	0.635332	2.87127				2.37505	0.496219
Subsolidus	6.07	19.83	1.4806	0	0.388221	1.44025	0.597871	2.42634		5.71944	17.4251	0.330346	0	0.0866181	1.26559	0.563342	1.91555		6.42056	22.2349	2.63086	0	0.689825	1.61492	0.6324	2.93714				2.42634	0.510798
Subsolidus	6.69	22.46	1.86344	0	0.488603	1.63127	0.658938	2.77881		6.31962	19.8409	0.622047	0	0.163104	1.44104	0.622458	2.22661		7.06038	25.0791	3.10483	0	0.814102	1.8215	0.695419	3.33102				2.77881	0.552205
Subsolidus	4.89	16.19	1.72045	0	0.451111	1.17588	0.481645	2.10864		4.5808	14.093	0.687641	0	0.180303	1.02358	0.451191	1.65507		5.1992	18.287	2.75327	0	0.721919	1.32818	0.5121	2.5622				2.10864	0.453566
Subsolidus	5.17	17.61	1.49905	0	0.393059	1.27901	0.509224	2.1813		4.84981	15.3914	0.424564	0	0.111323	1.11787	0.477687	1.70688		5.49019	19.8286	2.57355	0	0.674795	1.44015	0.540762	2.65571				2.1813	0.474413
Subsolidus	5.25	18.61	1.79887	0	0.471671	1.35164	0.517104	2.34042		4.92591	16.3069	0.68668	0	0.180051	1.18437	0.485182	1.8496		5.57409	20.9131	2.91105	0	0.763291	1.51892	0.549026	2.83124				2.34042	0.490818
Subsolidus	6.33	21.87	2.31546	0	0.607125	1.58842	0.62348	2.81902		5.96959	19.2983	1.08542	0	0.284602	1.40164	0.58798	2.27422		6.69041	24.4417	3.54551	0	0.929648	1.7752	0.658979	3.36382				2.81902	0.544802
Subsolidus	6.32	21.03	1.63282	0	0.428132	1.52741	0.622495	2.57804		5.96106	18.5265	0.441328	0	0.115718	1.34558	0.58714	2.04844		6.67894	23.5335	2.82431	0	0.740546	1.70924	0.657849	3.10763				2.57804	0.529596
Subsolidus	6.09	18.42	1.5544	0	0.407572	1.33784	0.599841	2.34526		5.7403	16.1328	0.445233	0	0.116742	1.17172	0.565397	1.85386		6.4397	20.7072	2.66358	0	0.698402	1.50396	0.634285	2.83665				2.34526	0.491394
Subsolidus	5.92	18.08	1.76197	0	0.461995	1.31315	0.583096	2.35824		5.57553	15.8215	0.660333	0	0.173142	1.14911	0.549168	1.87142		6.26447	20.3385	2.8636	0	0.750848	1.47719	0.617025	2.84506				2.35824	0.48682
Subsolidus	5.64	18.64	1.61898	0	0.424504	1.35382	0.555517	2.33384		5.30351	16.3343	0.505944	0	0.132661	1.18636	0.522374	1.8414		5.97649	20.9457	2.73201	0	0.716347	1.52128	0.588661	2.82629				2.33384	0.492447
Subsolidus	5.85	19.74	1.72045	0	0.451111	1.43372	0.576202	2.46103		5.50588	17.3426	0.570074	0	0.149476	1.25959	0.542307	1.95138		6.19412	22.1374	2.87083	0	0.752745	1.60784	0.610096	2.97068				2.46103	0.509653
Subsolidus	5.37	18.5	1.84499	0	0.483765	1.34366	0.528924	2.35634		5.0421	16.2061	0.734025	0	0.192465	1.17705	0.496627	1.86614		5.6979	20.7939	2.95596	0	0.775065	1.51026	0.56122	2.84655				2.35634	0.490203
Subsolidus	5.73	20	1.87267	0	0.491021	1.4526	0.564382	2.508		5.38915	17.5811	0.712424	0	0.186801	1.27691	0.53081	1.99452		6.07085	22.4189	3.03291	0	0.795242	1.62829	0.597954	3.02148				2.508	0.513479
Subsolidus	5.98	20.01	1.84499	0	0.483765	1.45333	0.589006	2.5261		5.63169	17.5902	0.6828	0	0.179033	1.27758	0.554699	2.01131		6.32831	22.4298	3.00718	0	0.788497	1.62907	0.623313	3.04088				2.5261	0.514786
Subsolidus	6.18	18.59	1.83577	0	0.481346	1.35019	0.608705	2.44024		5.82743	16.2885	0.714776	0	0.187418	1.18303	0.573978	1.94443		6.53257	20.8915	2.95675	0	0.775275	1.51735	0.643432	2.93606				2.44024	0.495816
Subsolidus	5.93	18.05	1.58669	0	0.416038	1.31097	0.584081	2.31109		5.58535	15.794	0.489572	0	0.128368	1.14712	0.550134	1.82562		6.27465	20.306	2.68381	0	0.703708	1.47482	0.618028	2.79656				2.31109	0.48547
Subsolidus	6.07	21.43	1.67894	0	0.440226	1.55646	0.597871	2.59456		5.71762	18.894	0.476674	0	0.124986	1.37227	0.563163	2.06042		6.42238	23.966	2.88121	0	0.755466	1.74065	0.632578	3.12869				2.59456	0.534137
Subsolidus	6.3	20.98	1.85883	0	0.487393	1.52378	0.620525	2.6317		5.94156	18.4806	0.664573	0	0.174254	1.34225	0.58522	2.10172		6.65844	23.4794	3.05308	0	0.800532	1.70531	0.655829	3.16167				2.6317	0.529976
Subsolidus	6.65	22.15	1.6282	0	0.426923	1.60875	0.654998	2.69068		6.28108	19.5558	0.400751	0	0.105079	1.42034	0.618661	2.14408		7.01892	24.7442	2.85566	0	0.748766	1.79717	0.691336	3.23727				2.69068	0.546598
Subsolidus	5.78	18.78	1.58208	0	0.414828	1.36399	0.569307	2.34813		5.43908	16.4626	0.464243	0	0.121727	1.19568	0.535728	1.85313		6.12092	21.0974	2.69992	0	0.70793	1.53231	0.602886	2.84312				2.34813	0.494995
Subsolidus	4.74	14.26	1.59592	0	0.418457	1.0357	0.466871	1.92103		4.43823	12.3316	0.627099	0	0.164428	0.895646	0.437148	1.49722		5.04177	16.1884	2.56473	0	0.672485	1.17576	0.496595	2.34484				1.92103	0.42381
Subsolidus	5.91	18.8	1.56363	0	0.409991	1.36544	0.582111	2.35755		5.56517	16.4809	0.444367	0	0.116515	1.19701	0.548147	1.86167		6.25483	21.1191	2.68289	0	0.703466	1.53388	0.616076	2.85342				2.35755	0.495877
Subsolidus	4.79	14.14	1.72045	0	0.451111	1.02699	0.471796	1.94989		4.4865	12.2222	0.751804	0	0.197126	0.887699	0.441903	1.52673		5.0935	16.0578	2.6891	0	0.705095	1.16628	0.501689	2.37306				1.94989	0.423166
Subsolidus	4.94	16.79	1.34684	0	0.353148	1.21946	0.48657	2.05918		4.6286	14.6414	0.303202	0	0.0795009	1.06341	0.455898	1.5988		5.2514	18.9386	2.39048	0	0.626796	1.37551	0.517242	2.51955				2.05918	0.460372
Subsolidus	5.15	18.38	1.78964	0	0.469252	1.33494	0.507254	2.31145		4.82948	16.0962	0.685619	0	0.179772	1.16907	0.475685	1.82453		5.47052	20.6638	2.89366	0	0.758731	1.50081	0.538824	2.79837				2.31145	0.48692
Subsolidus	5.17	19.5	1.94185	0	0.509163	1.41629	0.509224	2.43467		4.84747	17.1225	0.800405	0	0.20987	1.24361	0.477457	1.93094		5.49253	21.8775	3.0833	0	0.808455	1.58896	0.540992	2.93841				2.43467	0.503735
Subsolidus	4.61	15.82	1.89573	0	0.497068	1.14901	0.454067	2.10014		4.31106	13.7551	0.873219	0	0.228962	0.999031	0.424623	1.65262		4.90894	17.8849	2.91824	0	0.765175	1.29898	0.483511	2.54767				2.10014	0.447526
Subsolidus	7.02	26.21	2.33853	0	0.613172	1.90363	0.691442	3.20825		6.63725	23.2974	0.977008	0	0.256176	1.69209	0.653743	2.60201		7.40275	29.1226	3.70004	0	0.970168	2.11517	0.729141	3.81448				3.20825	0.606235
Subsolidus	3.7	14.48	1.75274	0	0.459577	1.05168	0.364435	1.87569		3.43758	12.5323	0.784911	0	0.205807	0.910223	0.338588	1.45462		3.96242	16.4277	2.72057	0	0.713346	1.19314	0.390282	2.29677				1.87569	0.421076
Subsolidus	5.76	22.47	2.13558	0	0.559958	1.632	0.567337	2.75929		5.41536	19.8501	0.896069	0	0.234953	1.44172	0.533391	2.21006		6.10464	25.0899	3.37508	0	0.884962	1.82228	0.601283	3.30852				2.75929	0.549231
Subsolidus	6.03	20.58	2.09406	0	0.549073	1.49473	0.593931	2.63773		5.67952	18.1133	0.909282	0	0.238418	1.31557	0.55941	2.1134		6.38048	23.0467	3.27885	0	0.859728	1.67388	0.628452	3.16206				2.63773	0.524332
Subsolidus	6.84	22.51	2.13096	0	0.558748	1.6349	0.673713	2.86736		6.46568	19.8869	0.881807	0	0.231214	1.44438	0.636844	2.31244		7.21432	25.1331	3.38012	0	0.886283	1.82542	0.710582	3.42228				2.86736	0.554922
[truncated: 373 more rows]

## Sheet: Sierra de Quilmes
					Units - micro watts m-3					heat production lower bound									heat production upper bound											heat production	1 sigma error
[truncated: 225 more rows]
